# Supplementary material
Source: publisher figshare collection journal article supplement (https://acs.figshare.com/ndownloader/files/14417324)

## Supporting Information I (SI-I)

### **Gold-Catalyzed Atom-Economic Synthesis of Sulfone-Containing Pyrrolo[2,1-*a*] Isoquinolines from Diynamides: Evidence for Consecutive Sulfonyl Migration**

*Jibing Liu,<sup>a,c</sup> Pushkin Chakraborty,<sup>a</sup> Heng Zhang,<sup>a,c</sup> Liang Zhong,<sup>b</sup> Zhi-Xiang Wang<sup>\*b</sup> and Xueliang Huang<sup>\*a,c</sup>*

*<sup>a</sup>Key Laboratory of Coal to Ethylene Glycol and Its Related Technology, Center for Excellence in Molecular Synthesis, Fujian Institute of Research on the Structure of Matter, Chinese Academy of Sciences, Fuzhou, Fujian, 350002, P. R. China.*

*<sup>b</sup>School of Chemical Sciences, University of the Chinese Academy of Sciences, Beijing 100049, P. R. China*

*<sup>c</sup> University of Chinese Academy of Sciences, Beijing 100049, P. R. China*

[zxwang@ucas.ac.cn](mailto:zxwang@ucas.ac.cn)

[huangxl@fjirsm.ac.cn](mailto:huangxl@fjirsm.ac.cn)

## Table of Content

|                                                                           |     |
|---------------------------------------------------------------------------|-----|
| General information .....                                                 | S3  |
| General procedure for preparation of 1,3-Diynamides.....                  | S4  |
| General procedure for the synthesis of Pyrrolo [2,1-a] isoquinolines..... | S30 |
| Crossover experiments .....                                               | S48 |
| Separation of the intermediate 2aa' .....                                 | S49 |
| Transformations of the products.....                                      | S50 |
| Crystal structures .....                                                  | S60 |
| Reference .....                                                           | S64 |
| Copy of $^1\text{H}$ NMR and $^{13}\text{C}$ NMR spectra .....            | S66 |

## General information

Unless otherwise indicated, all glassware was dried by a heat gun before use and all reactions were performed under an atmosphere of Argon. All solvents were distilled from appropriate drying agents prior to use. All reagents were used as received from commercial suppliers unless otherwise stated. Several aryl ethylamines, bromocetylenes, and (Bromobuta-1,3-diyn-1-yl)benzene were prepared according to the procedures reported in the literatures. Reaction progress was monitored by thin layer chromatography (TLC). Visualization was achieved by ultraviolet light (254 nm). Flash column chromatography was performed using silica gel 60 (200-300 mesh, Merck and co.). Pressed KBr Disks for infra-red spectra were recorded using a Bruker-VERTEX 70 FT-IR spectrometer. Wavelengths ( $\nu$ ) are reported in  $\text{cm}^{-1}$ . Melting points were recorded using a SGW Melting Point thermometer (X-4). All  $^1\text{H}$  NMR,  $^{13}\text{C}$  NMR spectra were recorded on Bruker AV-III 400 in  $\text{CDCl}_3$ ,  $\text{CD}_3\text{CN}$  or  $\text{DMSO}-d_6$ . Chemical shifts were given in parts per million (ppm,  $\delta$ ), referenced to the peak of tetramethylsilane, defined at  $\delta = 0.00$  ( $^1\text{H}$  NMR), or the solvent peak of  $\text{CDCl}_3$ , defined at  $\delta = 77.0$  ( $^{13}\text{C}$  NMR); the peak of  $\text{CD}_3\text{CN}$ , defined at  $\delta = 1.94$  ( $^1\text{H}$  NMR), defined at  $\delta = 1.32$  ( $^{13}\text{C}$  NMR); the peak of  $\text{DMSO}-d_6$ , defined at  $\delta = 2.50$  ( $^1\text{H}$  NMR), defined at  $\delta = 40.0$  ( $^{13}\text{C}$  NMR). Coupling constants were quoted in Hz ( $J$ ).  $^1\text{H}$  NMR Spectroscopy splitting patterns were designated as singlet (s), doublet (d), triplet (t), quartet (q), pentet (p), septet (se), octet (o). Splitting patterns that could not be interpreted or easily visualized were designated as multiplet (m) or broad (br).

## General procedure for preparation of 1,3-Diynamides

### Representative synthetic procedures A for the preparation of 1,3-diynamides **1** (**1a-1j**, **1s-1ac**):

All bromocetylenes were synthesized according to known procedures reported in the literatures.<sup>1</sup>

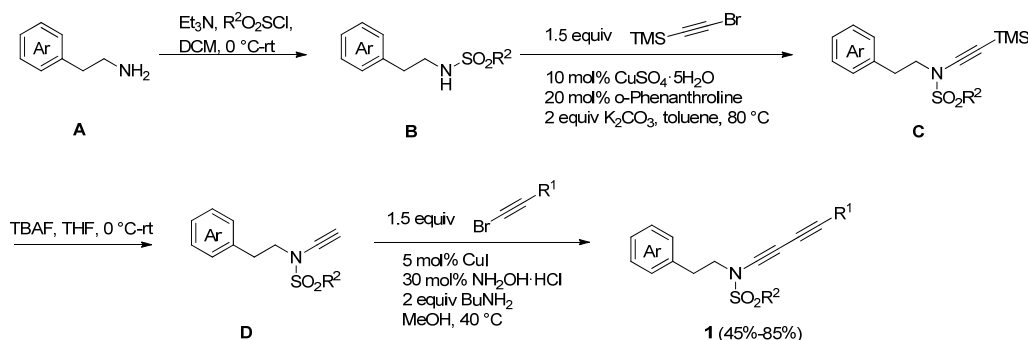

#### Choose **1a** as an example:

**Synthesis of B:** A solution of N-(3-methoxyphenethyl)methanesulfonamide (3.78 g, 25 mmol) in DCM (100 mL) at 0 °C was added Et<sub>3</sub>N (6.7 mL, 50 mmol). Then methylsulfonyl chloride (2.13 mL, 27.5 mmol) was added drop-wise via syringe at this temperature. The mixture was allowed to warm up to room temperature and stirred for 2 hours. The reaction was diluted with DCM (60 mL) and water (60 mL), the organic layer was separated and the aqueous layer was extracted with DCM (3 × 60 mL). The combined organic layers were washed with brine, dried over anhydrous Na<sub>2</sub>SO<sub>4</sub> and concentrated in vacuo to furnish the desired N-methyl indole. Recrystallization from PE/EA gave the product (5.55 g, 97%). R<sub>f</sub> = 0.40 (petroleum ether : ethyl acetate = 1 : 1); <sup>1</sup>H NMR (400 MHz, CDCl<sub>3</sub>) δ 7.26-7.21 (m, 1H), 6.81-6.75 (m, 3H), 4.51-4.39 (m, 1H), 3.80 (d, *J* = 1.6 Hz, 3H), 3.41-3.39 (m, 2H), 2.87-2.83 (m, 5H); <sup>13</sup>C NMR (100 MHz, CDCl<sub>3</sub>) δ 159.8, 139.4, 129.8, 121.0, 114.6, 112.1, 55.1, 44.3, 40.2, 36.4.

**Synthesis of C:** To a sealed tube was added N-(3-methoxyphenethyl)methanesulfonamide (2.27 g, 10 mmol), CuSO<sub>4</sub>·5H<sub>2</sub>O (500 mg, 2.0 mmol), 1,10-phenanthroline (720 mg, 4.0 mmol) and K<sub>2</sub>CO<sub>3</sub> (2.76 g, 20.0 mmol), and this mixture was treated with toluene (40 mL) and (bromoethynyl)trimethylsilane (2.65 g, 15 mmol) under argon. The solution was heated at 80 °C for 14 h. The resulting solution was cooled to room temperatures, filtered through celite, and concentrated in vacuo. Purification of the crude residue with silica flash chromatography gave the ynamide (2.30 g, 70 %). R<sub>f</sub> = 0.40 (petroleum ether : ethyl acetate = 5 : 1); <sup>1</sup>H NMR (400 MHz, CDCl<sub>3</sub>) δ 7.01 (t, *J* = 8.0 Hz, 1H), 6.63 (d, *J* = 7.6 Hz, 1H), 6.58 (dt, *J*<sub>1</sub> = 8.0 Hz, *J*<sub>2</sub> = 2.4 Hz, 2H), 3.58 (s, 3H), 3.50 (t, *J* = 7.2 Hz, 2H), 2.76 (t, *J* = 7.2 Hz, 2H), 2.48 (s, 3H), 0.00 (s, 9H); <sup>13</sup>C NMR (100 MHz, CDCl<sub>3</sub>) δ 159.7, 139.1, 129.6, 121.3, 114.7, 112.3, 93.7, 74.5, 55.0, 52.2, 38.0, 34.2. 0.1; IR (KBr) 2963, 2165, 1597, 1496, 1363, 125, 1163, 1044, 964, 852, 760, 701, 515 cm<sup>-1</sup>; HRMS-(ESI) (*m/z*): [M+Na]<sup>+</sup> calcd for C<sub>15</sub>H<sub>23</sub>NNaO<sub>3</sub>SSi, 348.1060; found 348.1060.

**Synthesis of D:** A solution of N-(3-methoxyphenethyl)-2-(trimethylsilyl)ethyn-1-amine (3.60 g, 11 mmol) in THF (80 mL) was cooled to 0 °C before drop-wise addition of TBAF (14.3 mL, 1 M in THF). The mixture was allowed to warm up to room temperature and stirred for 2 hours. The reaction mixture was diluted with ethyl acetate and washed with brine, dried over anhydrous Na<sub>2</sub>SO<sub>4</sub>, filtered, and concentrated. The residue was purified by column chromatography (petroleum: ethyl acetate = 6 : 1) to give N-(3-methoxyphenethyl)ethynamine (2.22 g, 80%) as a yellow oil. R<sub>f</sub> = 0.40 (petroleum ether : ethyl acetate = 5 : 1); <sup>1</sup>H NMR (400 MHz, CDCl<sub>3</sub>) δ 7.23 (t, *J* = 8.0 Hz, 1H), 6.85 (d, *J* = 7.6 Hz, 1H), 6.81-6.77 (m, 2H), 3.79 (s, 3H), 3.72 (t, *J* = 7.2 Hz, 2H), 3.00 (t, *J* =

7.2 Hz, 2H), 2.92 (s, 1H), 2.71 (s, 3H);  $^{13}\text{C}$  NMR (100 MHz,  $\text{CDCl}_3$ )  $\delta$  159.7, 139.0, 129.6, 121.2, 114.7, 112.3, 74.9, 60.5, 55.1, 52.1, 38.1, 34.1; IR (KBr) 3282, 2939, 2837, 2133, 1597, 1492, 1356, 1163, 1044, 964, 781, 515  $\text{cm}^{-1}$ ; HRMS-(ESI) (m/z):  $[\text{M}+\text{Na}]^+$  calcd for  $\text{C}_{12}\text{H}_{15}\text{NNaO}_3\text{S}$ , 276.0665; found 276.0665.<sup>2</sup>

**Synthesis of 1,3-diynamide 1a:** To a sealed tube was added CuI (15 mg, 0.075 mmol), hydroxylamine hydrochloride (31 mg, 0.45 mmol), MeOH (15 mL), N-(3-methoxyphenethyl)ethynamine (380 mg, 1.5 mmol), n-BuNH<sub>2</sub> (0.30 mL, 3.0 mmol) and 1-bromopropyne (407 mg, 0.23 mmol) under argon. The reaction mixture was stirred at 40 °C. Upon completion, the suspension was cooled to room temperature, diluted with ethyl acetate (30 mL) and water (20 mL), the organic layer was separated and the aqueous layer was extracted with ethyl acetate (3 × 20 mL). The combined organic layers were washed with brine, dried over anhydrous Na<sub>2</sub>SO<sub>4</sub> and concentrated in vacuo. The residue was purified by column chromatography to give N-(3-methoxyphenethyl)-N-(phenylbuta-1,3-diyn-1-yl)methanesulfonamide (392 mg, 74%).<sup>3</sup>

**Representative synthetic procedures B for the preparation of 1,3-diynamides 1 (1k-1p, 1r, 1ad-1ah):**

Aryl ethylamines were received from commercial suppliers or synthesized according to known procedures reported in the literatures.<sup>4</sup>

(Bromobuta-1,3-diyn-1-yl)benzene **F** was synthesized according to known procedures reported in the literature.<sup>5</sup>

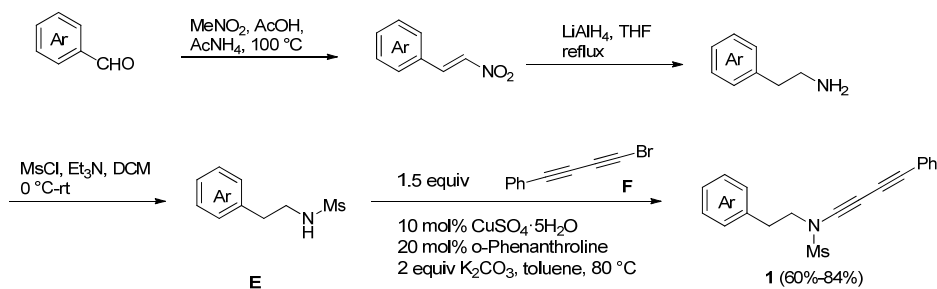

**Choose 1k as an example:**

**Synthesis of 1,3-diynamide 1k (same procedure as D to 1a):** To a sealed tube was added N-(2,3-dimethoxyphenethyl)methanesulfonamide (390 mg, 1.5 mmol),  $\text{CuSO}_4 \cdot 5\text{H}_2\text{O}$  (38 mg, 0.15 mmol), 1,10-phenanthroline (54 mg, 0.30 mmol) and  $\text{K}_2\text{CO}_3$  (621 mg, 4.5 mmol), and this mixture was treated with toluene (15 mL) and (bromobuta-1,3-diyn-1-yl)benzene (460 mg, 2.25 mmol) under argon. The solution was heated at 80 °C for 14 h. The resulting solution was cooled to room temperatures, filtered through celite, and concentrated in vacuo. Purification of the crude residue with silica flash chromatography gave N-(2,3-dimethoxyphenethyl)-N-(phenylbuta-1,3-diyn-1-yl)methanesulfonamide (426 mg, 74%).<sup>3</sup>

**Synthetic procedures for the preparation of 1,3-diynamides 1q:**<sup>6</sup>

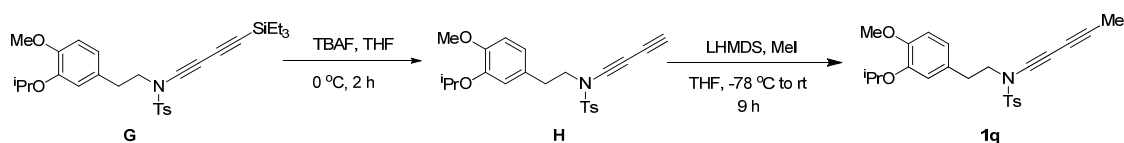

**N-(3-isopropoxy-4-methoxyphenethyl)-4-methyl-N-((triethylsilyl)buta-1,3-diyn-1-yl)benzenesulfonamide (G)**

Compound **G** was obtained according to the general procedure A outlined above as a yellow oil (748 mg, 95%);  $R_f = 0.7$  (Petroleum ether : ethyl acetate = 4 : 1);  $^1\text{H}$  NMR (400 MHz,  $\text{CDCl}_3$ )  $\delta$  7.52 (d,  $J = 8.0$  Hz, 2H), 7.13 (d,  $J = 8.0$  Hz, 2H), 6.60 (d,  $J = 8.0$  Hz, 1H), 6.52 (d,  $J = 10.8$  Hz, 2H), 4.35-4.29 (m, 1H), 3.66 (s, 3H), 3.40 (t,  $J = 7.2$  Hz,

2H), 2.69 (t,  $J = 7.2$  Hz, 2H), 2.28 (s, 3H), 1.19 (d,  $J = 6.0$  Hz, 6H), 0.86 (t,  $J = 8.0$  Hz, 9H), 0.49 (q,  $J = 7.6$  Hz, 6H);  $^{13}\text{C}$  NMR (100 MHz,  $\text{CDCl}_3$ )  $\delta$  149.2, 147.0, 144.8, 134.2, 129.7, 129.2, 127.3, 121.1, 116.5, 111.9, 88.3, 88.0, 71.2, 68.2, 59.7, 55.7, 52.6, 33.6, 21.9, 21.4, 7.2, 4.0; IR (KBr)  $\nu$  2953, 2918, 2851, 2221, 1510, 1471, 1377, 1261, 1170, 1023, 809, 676, 578, 543  $\text{cm}^{-1}$ ; HRMS (ESI)  $m/z$ :  $[\text{M} + \text{Na}]^+$  calcd for  $\text{C}_{29}\text{H}_{39}\text{NNaO}_4\text{SSi}$ , 548.2261; found 548.2258.

***N*-(buta-1,3-diy-1-yl)-*N*-(3-isopropoxy-4-methoxyphenethyl)-4-methylbenzenesulfonamide (**H**)**

To a solution of **G** (1.30 g, 2.47 mmol) in THF (15 mL), TBAF (4.9 mL, 1M in THF, 4.94 mmol) was added dropwise at 0 °C. The solution was stirred for 2 h during which the temperature gradually increased to room temperature. The reaction was quenched by water and extracted with ethyl acetate (3  $\times$  20 mL). The combined extracts was washed with brine and dried over  $\text{Na}_2\text{SO}_4$ . The solvent was removed under reduced pressure and the residual mass was purified by silica gel column chromatography using petroleum ether : ethyl acetate (5 : 1) as eluent to get **H** as a yellow oil (822 mg, 81%);  $R_f = 0.5$  (petroleum ether : ethyl acetate = 3 : 1);  $^1\text{H}$  NMR (400 MHz,  $\text{CDCl}_3$ )  $\delta$  7.58 (d,  $J = 8.4$  Hz, 2H), 7.21 (d,  $J = 8.0$  Hz, 2H), 6.68 (d,  $J = 8.0$  Hz, 1H), 6.61-6.58 (m, 2H), 4.45-4.36 (m, 1H), 3.73 (s, 3H), 3.50 (t,  $J = 7.2$  Hz, 2H), 2.76 (t,  $J = 7.2$  Hz, 2H), 2.46 (s, 1H), 2.35 (s, 3H), 1.26 (d,  $J = 6.4$  Hz, 6H);  $^{13}\text{C}$  NMR (100 MHz,  $\text{CDCl}_3$ )  $\delta$  149.1, 146.9, 144.9, 134.0, 129.7, 129.1, 127.1, 121.1, 116.4, 111.9, 71.6, 71.1, 67.4, 58.7, 55.6, 52.4, 33.4, 21.8, 21.3; IR (KBr)  $\nu$  2942, 2354, 1636, 1464, 1257, 753, 417  $\text{cm}^{-1}$ ; HRMS (ESI)  $m/z$ :  $[\text{M} + \text{Na}]^+$  calcd for  $\text{C}_{23}\text{H}_{25}\text{NNaO}_4\text{S}$ , 434.1396; found 434.1397.<sup>2</sup>



**Synthesis of 1,3-dynamide 1q:** To a solution of **H** (400 mg, 0.97 mmol) in THF (10 mL), LHMDs (1.5 mL, 1M in THF, 1.5 equiv.) was added dropwise at -78 °C. The temperature was increased to -60 °C and stirred for one hour after which the temperature was again maintained at -78 °C. Then MeI (1.94 mmol, 2 equiv.) was added slowly and the temperature was gradually increased to room temperature. It was stirred for another 9 h after which it was diluted by adding 10 mL of ethyl acetate and carefully quenched by saturated NH<sub>4</sub>Cl solution. The reaction mixture was partitioned in a separating flask and the aqueous layer was extracted by ethyl acetate (3 × 15 mL). The combined extracts was washed with brine and dried over Na<sub>2</sub>SO<sub>4</sub>. The solvent was removed under reduced pressure and the residual mass was purified by silica gel column chromatography using petroleum ether : ethyl acetate (5 : 1) as eluent to get **1q** as a yellow oil (256 mg, 62%).

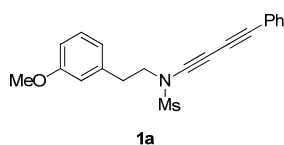

**N-(3-methoxyphenethyl)-N-(phenylbuta-1,3-diyne-1-yl)methanesulfonamide (1a)**

Compound **1a** was obtained according to the general procedure A outlined above as a yellow oil;  $R_f$  = 0.40 (petroleum ether : ethyl acetate = 5 : 1); <sup>1</sup>H NMR (400 MHz, CDCl<sub>3</sub>) δ 7.50 (dd,  $J_1$  = 7.6 Hz,  $J_2$  = 1.6 Hz, 2H), 7.37-7.31 (m, 3H), 7.25 (t,  $J$  = 8.0 Hz, 1H), 6.88 (d,  $J$  = 7.6 Hz, 1H), 6.84-6.83 (m, 1H), 6.82-6.79 (m, 1H), 3.81 (s, 3H), 3.80 (t,  $J$  = 7.2 Hz, 2H), 3.04 (t,  $J$  = 7.2 Hz, 2H), 2.74 (s, 3H); <sup>13</sup>C NMR (100 MHz, CDCl<sub>3</sub>) δ 159.9, 138.8, 132.4, 129.8, 129.1, 128.4, 121.9, 121.4, 114.7, 112.6, 81.8, 73.2, 72.7, 59.7, 55.2, 52.7, 39.0, 34.4; IR (KBr) 3170, 1643, 1570, 1412, 1163, 1016, 803, 645, 526 cm<sup>-1</sup>; HRMS-(ESI) (m/z): [M+Na]<sup>+</sup> calcd for C<sub>20</sub>H<sub>19</sub>NNaO<sub>3</sub>S, 376.0978; found 376.0976.

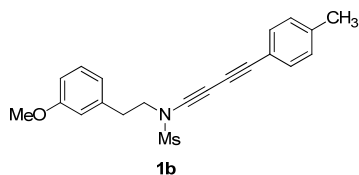

**N-(3-methoxyphenethyl)-N-(p-tolylbuta-1,3-diyn-1-yl)methanesulfonamide (1b)**

Compound **1b** was obtained according to the general procedure A outlined above as a yellow oil (297 mg, 54%);  $R_f = 0.40$  (petroleum ether : ethyl acetate = 5 : 1);  $^1\text{H}$  NMR (400 MHz,  $\text{CDCl}_3$ )  $\delta$  7.39 (d,  $J = 8.0$  Hz, 2H), 7.25-7.22 (m, 1H), 7.13 (d,  $J = 8.4$  Hz, 2H), 6.87 (d,  $J = 7.6$  Hz, 1H), 6.83 (s, 1H), 6.79 (dd,  $J_1 = 8.4$  Hz,  $J_2 = 2.4$  Hz, 1H), 3.80 (s, 3H), 3.79 (t,  $J = 7.2$  Hz, 2H), 3.02 (t,  $J = 7.2$  Hz, 2H), 2.72 (s, 3H), 2.35 (s, 3H);  $^{13}\text{C}$  NMR (100 MHz,  $\text{CDCl}_3$ )  $\delta$  159.9, 139.5, 138.8, 132.3, 129.8, 129.2, 121.4, 118.7, 114.7, 112.6, 82.0, 72.5, 72.4, 59.8, 55.2, 52.7, 38.9, 34.4, 21.6; IR (KBr)  $\nu$  2890, 2217, 1619, 1492, 1405, 1244, 1167, 768, 614  $\text{cm}^{-1}$ ; HRMS-(ESI) ( $m/z$ ):  $[\text{M}+\text{Na}]^+$  calcd for  $\text{C}_{21}\text{H}_{21}\text{NNaO}_3\text{S}$ , 390.1134; found 390.1134.

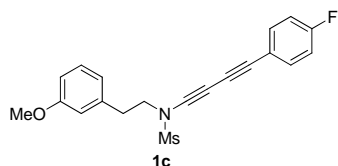

**N-((4-fluorophenyl)buta-1,3-diyn-1-yl)-N-(3-ethoxyphenethyl)methanesulfonamide (1c)**

Compound **1c** was obtained according to the general procedure A outlined above as a yellow oil (395 mg, 71%);  $R_f = 0.50$  (petroleum ether : ethyl acetate = 5 : 1);  $^1\text{H}$  NMR (400 MHz,  $\text{CDCl}_3$ )  $\delta$  7.51-7.47 (m, 2H), 7.25 (t,  $J = 8.0$  Hz, 1H), 7.03 (t,  $J = 8.0$  Hz, 2H), 6.88 (d,  $J = 7.6$  Hz, 1H), 6.83-6.79 (m, 2H), 3.82 (s, 3H), 3.81 (t,  $J = 7.2$  Hz, 2H), 3.04 (t,  $J = 7.2$  Hz, 2H), 2.73 (s, 3H);  $^{13}\text{C}$  NMR (100 MHz,  $\text{CDCl}_3$ )  $\delta$  162.9 (d,  $J_{\text{C-F}} = 249.9$  Hz), 159.9, 138.8, 134.4 (d,  $J_{\text{C-F}} = 8.5$  Hz), 129.8, 121.4, 118.0 (d,  $J_{\text{C-F}} = 3.6$  Hz), 115.8 (d,  $J_{\text{C-F}}$

$f = 22.1$  Hz), 114.8, 112.6, 80.7, 73.0, 72.7, 59.6, 55.2, 52.7, 39.0, 34.4;  $^{19}\text{F}$  NMR (376 MHz,  $\text{CDCl}_3$ )  $\delta$  -108.8; IR (KBr)  $\nu$  2886, 1622, 1517, 1401, 1209, 620  $\text{cm}^{-1}$ ; HRMS-(ESI) ( $m/z$ ):  $[\text{M}+\text{Na}]^+$  calcd for  $\text{C}_{20}\text{H}_{18}\text{FNNaO}_3\text{S}$ , 394.0884; found 394.0882.

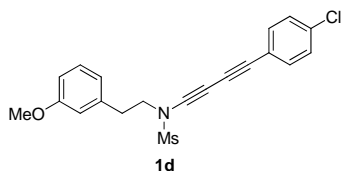

**N-((4-chlorophenyl)buta-1,3-diyne-1-yl)-N-(3-ethoxyphenethyl)methanesulfonamide (1d)**

Compound **1d** was obtained according to the general procedure A outlined above as a yellow oil (273 mg, 47%);  $R_f = 0.50$  (petroleum ether : ethyl acetate = 5 : 1);  $^1\text{H}$  NMR (400 MHz,  $\text{CDCl}_3$ )  $\delta$  7.42 (d,  $J = 6.4$  Hz, 2H), 7.30 (d,  $J = 8.4$  Hz, 2H), 7.25 (t,  $J = 8.0$  Hz, 1H), 6.87 (d,  $J = 7.6$  Hz, 1H), 6.83-3.79 (m, 2H), 3.81 (s, 3H), 3.80 (t,  $J = 7.2$  Hz, 2H), 3.03 (t,  $J = 7.2$  Hz, 2H), 2.73 (s, 3H);  $^{13}\text{C}$  NMR (100 MHz,  $\text{CDCl}_3$ )  $\delta$  159.9, 138.7, 135.2, 133.5, 129.8, 128.8, 121.3, 120.4, 114.8, 112.6, 80.6, 74.2, 73.3, 59.5, 55.2, 52.7, 39.0, 34.4; IR (KBr)  $\nu$  3002, 2354, 1618, 1401, 1160, 620, 466  $\text{cm}^{-1}$ ; HRMS-(ESI) ( $m/z$ ):  $[\text{M}+\text{Na}]^+$  calcd for  $\text{C}_{20}\text{H}_{18}\text{ClNNaO}_3\text{S}$ , 410.0588; found 410.0588.

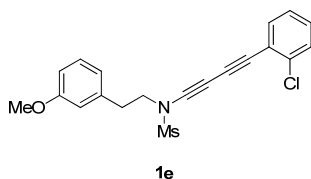

**N-((2-chlorophenyl)buta-1,3-diyne-1-yl)-N-(3-ethoxyphenethyl)methanesulfonamide (1e)**

Compound **1e** was obtained according to the general procedure A outlined above as a yellow oil (336 mg, 58%);  $R_f = 0.45$  (petroleum ether : ethyl acetate = 5 : 1);  $^1\text{H}$  NMR

(400 MHz, CDCl<sub>3</sub>)  $\delta$  7.52 (dd,  $J_1 = 7.2$  Hz,  $J_2 = 1.6$  Hz, 1H), 7.40 (dd,  $J_1 = 8.0$  Hz,  $J_2 = 0.8$  Hz, 1H), 7.31-7.27 (m, 1H), 7.26-7.24 (m, 1H), 7.21 (dd,  $J_1 = 7.6$  Hz,  $J_2 = 1.2$  Hz, 1H), 6.87 (d,  $J = 7.6$  Hz, 1H), 6.83 (t,  $J = 2.0$  Hz, 1H), 6.81 (dd,  $J_1 = 8.4$  Hz,  $J_2 = 2.4$  Hz, 1H), 3.81 (s, 3H), 3.82 (t,  $J = 4.8$  Hz, 2H), 3.04 (t,  $J = 7.2$  Hz, 2H), 2.75 (s, 3H); <sup>13</sup>C NMR (100 MHz, CDCl<sub>3</sub>)  $\delta$  159.9, 138.8, 136.7, 134.3, 130.1, 129.9, 129.34, 126.6, 122.1, 121.4, 114.8, 112.8, 78.3, 78.1, 74.3, 59.6, 55.3, 52.8, 39.1, 34.5; IR (KBr)  $\nu$  2935, 2231, 2150, 1590, 1478, 1370, 1268, 1167, 957, 897, 757, 508 cm<sup>-1</sup>; HRMS-(ESI) ( $m/z$ ): [M+Na]<sup>+</sup> calcd for C<sub>20</sub>H<sub>18</sub>ClNNaO<sub>3</sub>S, 410.0588; found 410.0585.

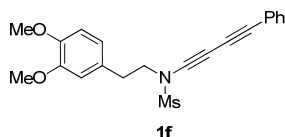

**N-(3,4-dimethoxyphenethyl)-N-(phenylbuta-1,3-diyn-1-yl)methanesulfonamide (1f)**

Compound **1f** was obtained according to the general procedure A outlined above as a yellow solid (356 mg, 62%);  $R_f = 0.40$  (petroleum ether : ethyl acetate = 5 : 1); mp: 120-123 °C; <sup>1</sup>H NMR (400 MHz, CDCl<sub>3</sub>)  $\delta$  7.50 (dd,  $J_1 = 7.6$  Hz,  $J_2 = 1.6$  Hz, 2H), 7.39-7.31 (m, 3H), 6.84 (appeared as a singlet, 2H), 6.81 (s, 1H), 3.91 (s, 3H), 3.86 (s, 3H), 3.79 (t,  $J = 8.0$  Hz, 2H), 3.01 (t,  $J = 8.0$  Hz, 2H), 2.76 (s, 3H); <sup>13</sup>C NMR (100 MHz, CDCl<sub>3</sub>)  $\delta$  149.1, 148.1, 132.4, 129.7, 129.1, 128.4, 121.8, 121.2, 112.3, 111.4, 81.8, 73.1, 72.8, 59.7, 55.94, 55.93, 52.8, 39.0, 34.0; IR (KBr)  $\nu$  2834, 2361, 2235, 2158, 1513, 1398, 1349, 1156, 967, 746, 617, 512 cm<sup>-1</sup>; HRMS-(ESI) ( $m/z$ ): [M+Na]<sup>+</sup> calcd for C<sub>21</sub>H<sub>21</sub>NNaO<sub>4</sub>S, 406.1083; found 406.1083.

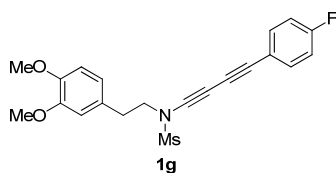

**N-(3,4-dimethoxyphenethyl)-N-((4-fluorophenyl)buta-1,3-diyn-1-yl)methanesulfonamide (1g)**

Compound **1g** was obtained according to the general procedure A outlined above as a yellow oil (391 mg, 65%);  $R_f = 0.20$  (petroleum ether : ethyl acetate = 5 : 1);  $^1\text{H}$  NMR (400 MHz,  $\text{CDCl}_3$ )  $\delta$  7.48 (dd,  $J_1 = 8.4$  Hz,  $J_2 = 5.2$  Hz, 2H), 7.03 (t,  $J = 8.8$  Hz, 2H), 6.82 (d,  $J = 9.6$  Hz, 3H), 3.90 (s, 3H), 3.86 (s, 3H), 3.79 (t,  $J = 7.2$  Hz, 2H), 3.00 (t,  $J = 7.2$  Hz, 2H), 2.76 (s, 3H);  $^{13}\text{C}$  NMR (100 MHz,  $\text{CDCl}_3$ )  $\delta$  162.9 (d,  $J_{\text{C-F}} = 249.9$  Hz), 149.1, 148.1, 134.4 (d,  $J_{\text{C-F}} = 8.5$  Hz), 129.6, 121.1, 117.9 (d,  $J_{\text{C-F}} = 3.6$  Hz), 115.8 (d,  $J_{\text{C-F}} = 22.1$  Hz), 112.2, 111.3, 80.7, 72.9, 72.8, 59.5, 55.89, 55.88, 52.8, 39.0, 34.0.  $^{19}\text{F}$  NMR (376 MHz,  $\text{CDCl}_3$ )  $\delta$  -108.7; IR (KBr)  $\nu$  3415, 2235, 2151, 1615, 1492, 1398, 1363, 1247, 1163, 1037, 764, 613  $\text{cm}^{-1}$ ; HRMS-(ESI) ( $m/z$ ):  $[\text{M}+\text{Na}]^+$  calcd for  $\text{C}_{21}\text{H}_{20}\text{FNNaO}_4\text{S}$ , 424.0989; found 424.0989.

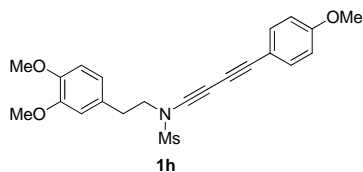

**N-(3,4-dimethoxyphenethyl)-N-((4-methoxyphenyl)buta-1,3-diyn-1-yl)methanesulfonamide (1h)**

Compound **1h** was obtained according to the general procedure A outlined above as a yellow oil (316 mg, 51%);  $R_f = 0.15$  (petroleum ether : ethyl acetate = 3 : 1);  $^1\text{H}$  NMR (400 MHz,  $\text{CDCl}_3$ )  $\delta$  7.44 (dt,  $J_1 = 9.2$  Hz,  $J_2 = 2.0$  Hz, 2H), 6.87-6.83 (m, 4H), 6.81 (d,  $J = 0.8$  Hz, 1H), 3.90 (s, 1H), 3.86 (s, 3H), 3.82 (s, 3H), 3.78 (t,  $J = 7.2$  Hz, 2H), 3.00 (t,  $J = 7.2$  Hz, 2H), 2.76 (s, 3H);  $^{13}\text{C}$  NMR (100 MHz,  $\text{CDCl}_3$ )  $\delta$  160.3, 149.0, 148.0, 134.1, 129.7, 121.1, 114.1, 113.6, 112.2, 111.3, 81.9, 72.3,

71.9, 59.8, 55.87, 55.86, 55.3, 52.8, 38.9, 33.9, 30.8; IR (KBr)  $\nu$  3105, 1644, 1528, 1417, 1165, 1028, 626  $\text{cm}^{-1}$ ; HRMS-(ESI) ( $m/z$ ):  $[\text{M}+\text{Na}]^+$  calcd for  $\text{C}_{22}\text{H}_{23}\text{NNaO}_5\text{S}$ , 436.1189; found 436.1189.

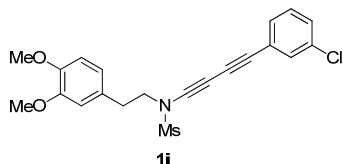

**N-((3-chlorophenyl)buta-1,3-diyn-1-yl)-N-(3,4-dimethoxyphenethyl)methanesulfonamide (1i)**

Compound **1i** was obtained according to the general procedure A outlined above as a yellow oil (394 mg, 63%);  $R_f$  = 0.20 (petroleum ether : ethyl acetate = 5 : 1);  $^1\text{H}$  NMR (400 MHz,  $\text{CDCl}_3$ )  $\delta$  7.46 (s, 1H), 7.35-7.32 (m, 2H), 7.28-7.24 (m, 1H), 6.82 (d,  $J$  = 9.6 Hz, 3H), 3.90 (s, 3H), 3.86 (s, 3H), 3.79 (t,  $J$  = 7.2 Hz, 2H), 3.00 (t,  $J$  = 6.8 Hz, 2H), 2.75 (s, 3H);  $^{13}\text{C}$  NMR (100 MHz,  $\text{CDCl}_3$ )  $\delta$  149.0, 148.1, 134.2, 131.9, 130.3, 129.6, 129.5, 129.3, 123.5, 121.1, 112.1, 111.3, 80.1, 74.3, 73.6, 59.3, 55.84, 55.82, 52.8, 39.0, 33.9; IR (KBr)  $\nu$  3005, 2357, 1615, 1405, 1170, 624, 473  $\text{cm}^{-1}$ ; HRMS-(ESI) ( $m/z$ ):  $[\text{M}+\text{Na}]^+$  calcd for  $\text{C}_{21}\text{H}_{20}\text{ClNNaO}_4\text{S}$ , 440.0694; found 440.0688.

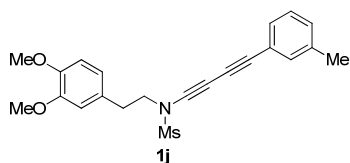

**N-(3,4-dimethoxyphenethyl)-N-(m-tolylbuta-1,3-diyn-1-yl)methanesulfonamide (1j)**

Compound **1j** was obtained according to the general procedure A outlined above as a yellow solid (425 mg, 72%);  $R_f$  = 0.30 (petroleum ether : ethyl acetate = 5 : 1); mp: 128-130  $^\circ\text{C}$ ;  $^1\text{H}$  NMR (400 MHz,  $\text{CDCl}_3$ )  $\delta$  7.31-7.27 (m, 2H), 7.21 (t,  $J$  = 7.8 Hz, 1H), 6.16 (d,  $J$  = 7.8 Hz, 1H), 6.82 (appeared as a

singlet, 2H), 6.81 (s, 1H), 3.89 (s, 3H), 3.87 (s, 3H), 3.77 (t,  $J = 6.8$  Hz, 2H), 3.00 (t,  $J = 6.8$  Hz, 2H), 2.75 (s, 3H), 2.32 (s, 3H);  $^{13}\text{C}$  NMR (100 MHz,  $\text{CDCl}_3$ )  $\delta$  149.1, 148.1, 138.1, 132.8, 130.1, 129.7, 129.4, 128.3, 121.6, 121.1, 112.2, 111.3, 82.0, 72.7, 72.6, 59.7, 55.90, 55.89, 52.8, 38.9, 34.0, 21.2; IR (KBr)  $\nu$  3137, 2237, 1589, 1512, 1393, 1260, 1238, 1155, 1028, 965, 851, 687, 520  $\text{cm}^{-1}$ ; HRMS-(ESI) ( $m/z$ ):  $[\text{M}+\text{Na}]^+$  calcd for  $\text{C}_{22}\text{H}_{23}\text{NNaO}_4\text{S}$ , 420.1240; found 420.1239.

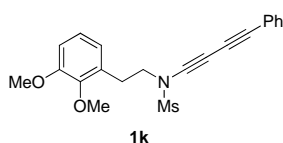

**N-(2,3-dimethoxyphenethyl)-N-(phenylbuta-1,3-diyn-1-yl)methanesulfonamide (1k)**

Compound **1k** was obtained according to the general procedure B outlined above as a yellow oil (426 mg, 74%);  $R_f = 0.70$  (petroleum ether : ethyl acetate = 3 : 1);  $^1\text{H}$  NMR (400 MHz,  $\text{CDCl}_3$ )  $\delta$  7.51-7.48 (m, 2H), 7.36-7.31 (m, 3H), 7.01 (t,  $J = 7.8$  Hz, 1H), 6.87-6.84 (m, 2H), 3.90 (s, 3H), 3.86 (s, 3H), 3.79 (t,  $J = 6.8$  Hz, 2H), 3.07 (t,  $J = 7.2$  Hz, 2H), 2.86 (s, 3H);  $^{13}\text{C}$  NMR (100 MHz,  $\text{CDCl}_3$ )  $\delta$  152.8, 147.6, 132.3, 130.8, 129.0, 128.4, 124.0, 122.7, 122.0, 111.7, 81.5, 73.3, 73.1, 60.7, 59.3, 55.7, 51.8, 39.1, 29.6; IR (KBr)  $\nu$  2928, 2834, 2235, 2151, 1583, 1485, 1359, 1163, 963, 893, 753, 680, 515  $\text{cm}^{-1}$ ; HRMS-(ESI) ( $m/z$ ):  $[\text{M}+\text{Na}]^+$  calcd for  $\text{C}_{21}\text{H}_{21}\text{NNaO}_4\text{S}$ , 406.1083; found 406.1079.

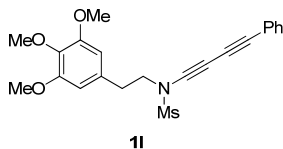

**N-(phenylbuta-1,3-diyn-1-yl)-N-(3,4,5-trimethoxyphenethyl)methanesulfonamide (1l)**

Compound **1l** was obtained according to the general procedure B outlined above as a yellow solid (405 mg, 65%);  $R_f = 0.55$  (petroleum ether : ethyl acetate = 3 : 1); mp: 116-

118 °C;  $^1\text{H}$  NMR (400 MHz,  $\text{CDCl}_3$ )  $\delta$  7.50-7.48 (m, 2H), 7.37-7.33 (m, 3H), 6.51 (s, 2H), 3.88 (s, 6H), 3.82 (s, 3H), 3.80 (t,  $J = 7.2$  Hz, 2H), 3.00 (t,  $J = 7.2$  Hz, 2H), 2.84 (s, 3H);  $^{13}\text{C}$  NMR (100 MHz,  $\text{CDCl}_3$ )  $\delta$  153.1, 136.7, 132.6, 132.0, 128.9, 128.2, 121.4, 105.8, 81.6, 72.9, 72.8, 60.5, 59.3, 55.8, 52.3, 38.6, 34.5; IR (KBr)  $\nu$  3022, 2923, 2232, 2145, 1494, 1365, 1172, 752, 570, 512  $\text{cm}^{-1}$ ; HRMS-(ESI) ( $m/z$ ):  $[\text{M}+\text{Na}]^+$  calcd for  $\text{C}_{22}\text{H}_{23}\text{NNaO}_5\text{S}$ , 436.1189; found 436.1187.

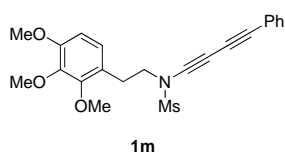

**N-(phenylbuta-1,3-diyn-1-yl)-N-(2,3,4-trimethoxyphenethyl)methanesulfonamide  
(1m)**

Compound **1m** was obtained according to the general procedure B outlined above as a yellow oil (371 mg, 60%);  $R_f = 0.75$  (petroleum ether : ethyl acetate = 3 : 1);  $^1\text{H}$  NMR (400 MHz,  $\text{CDCl}_3$ )  $\delta$  7.50-7.47 (m, 2H), 7.36-7.27 (m, 3H), 6.90 (d,  $J = 8.4$  Hz, 1H), 6.60 (d,  $J = 8.4$  Hz, 1H), 3.93 (s, 3H), 3.84 (s, 3H), 3.82 (s, 3H), 3.75 (t,  $J = 7.2$  Hz, 2H), 2.97 (t,  $J = 6.8$  Hz, 2H), 2.86 (s, 3H);  $^{13}\text{C}$  NMR (100 MHz,  $\text{CDCl}_3$ )  $\delta$  152.9, 151.9, 141.9, 132.0, 128.8, 128.2, 124.8, 122.5, 121.6, 106.8, 81.3, 73.2, 73.1, 60.6, 60.4, 58.8, 55.7, 51.6, 38.8, 29.3; IR (KBr)  $\nu$  2939, 2827, 2231, 2158, 1563, 1496, 1370, 1170, 1104, 1013, 967, 761, 698, 551  $\text{cm}^{-1}$ ; HRMS-(ESI) ( $m/z$ ):  $[\text{M}+\text{Na}]^+$  calcd for  $\text{C}_{22}\text{H}_{23}\text{NNaO}_5\text{S}$ , 436.1189; found 436.1187.

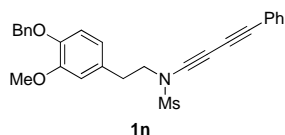



**N-(4-(benzyloxy)-3-methoxyphenethyl)-N-(phenylbuta-1,3-diyne-1-yl)methanesulfonamide (1n)**

Compound **1n** was obtained according to the general procedure B outlined above as a yellow oil (427 mg, 62%);  $R_f = 0.25$  (petroleum ether : ethyl acetate = 5 : 1);  $^1\text{H}$  NMR (400 MHz,  $\text{CDCl}_3$ )  $\delta$  7.48-7.45 (m, 2H), 7.40-7.38 (m, 2H), 7.34-7.26 (m, 6H), 6.83-6.81 (m, 2H), 6.72 (dd,  $J_1 = 8.0$  Hz,  $J_2 = 2.0$  Hz, 1H), 5.10 (s, 2H), 3.87 (s, 3H), 3.73 (t,  $J = 6.8$  Hz, 2H), 2.94 (t,  $J = 6.8$  Hz, 2H), 2.59 (s, 3H);  $^{13}\text{C}$  NMR (100 MHz,  $\text{CDCl}_3$ )  $\delta$  149.7, 146.9, 136.8, 132.1, 130.2, 129.0, 128.32, 128.29, 127.7, 127.1, 121.6, 121.0, 114.2, 112.7, 81.6, 73.1, 72.8, 70.2, 59.4, 55.8, 52.6, 38.7, 33.7; IR (KBr)  $\nu$  2921, 2231, 1646, 1510, 1366, 1160, 1012, 764, 536  $\text{cm}^{-1}$ ; HRMS-(ESI) ( $m/z$ ):  $[\text{M}+\text{Na}]^+$  calcd for  $\text{C}_{27}\text{H}_{25}\text{NNaO}_4\text{S}$ , 482.1396; found 482.1394.

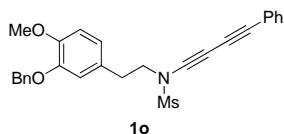

**N-(3-(benzyloxy)-4-methoxyphenethyl)-N-(phenylbuta-1,3-diyne-1-yl)methanesulfonamide (1o)**

Compound **1o** was obtained according to the general procedure B outlined above as a yellow oil (309 mg, 45%);  $R_f = 0.50$  (petroleum ether : ethyl acetate = 3 : 1);  $^1\text{H}$  NMR (400 MHz,  $\text{CDCl}_3$ )  $\delta$  7.51-7.46 (m, 4H), 7.38-7.30 (m, 6H), 6.85-6.84 (m, 3H), 5.18 (s, 2H), 3.86 (s, 3H), 3.73 (t,  $J = 6.8$  Hz, 2H), 2.93 (t,  $J = 6.8$  Hz, 2H), 2.54 (s, 3H);  $^{13}\text{C}$  NMR (100 MHz,  $\text{CDCl}_3$ )  $\delta$  148.8, 148.0, 136.9, 132.3, 129.7, 129.1, 128.6, 128.4, 127.9, 127.4, 121.8, 121.7, 115.2, 112.0, 81.8, 73.3, 72.8, 70.9, 59.7, 56.0, 52.8, 38.9, 33.8; IR (KBr)  $\nu$  3026, 2932, 2371, 2224, 2158, 1513, 1394, 1352, 1261, 1167, 1009, 697, 519  $\text{cm}^{-1}$ ; HRMS-(ESI) ( $m/z$ ):  $[\text{M}+\text{Na}]^+$  calcd for  $\text{C}_{27}\text{H}_{25}\text{NNaO}_4\text{S}$ , 482.1396; found 482.1393.

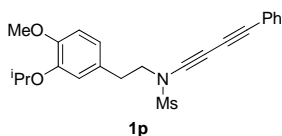

**N-(3-isopropoxy-4-methoxyphenethyl)-N-(phenylbuta-1,3-diyne-1-yl)methanesulfonamide (1p)**

Compound **1p** was obtained according to the general procedure B outlined above as a yellow oil (460 mg, 75%);  $R_f = 0.50$  (petroleum ether : ethyl acetate = 3 : 1);  $^1\text{H}$  NMR (400 MHz,  $\text{CDCl}_3$ )  $\delta$  7.49 (dd,  $J_1 = 8.0$  Hz,  $J_2 = 2.0$  Hz, 2H), 7.37-7.33 (m, 3H), 6.84 (s, appeared as a singlet, 3H), 4.60-4.51 (m, 1H), 3.83 (s, 3H), 3.78 (t,  $J = 7.2$  Hz, 2H), 2.98 (t,  $J = 7.2$  Hz, 2H), 2.71 (s, 3H), 1.38 (d,  $J = 6.0$  Hz, 6H);  $^{13}\text{C}$  NMR (100 MHz,  $\text{CDCl}_3$ )  $\delta$  149.5, 147.4, 132.3, 129.6, 129.1, 128.4, 121.8, 121.6, 116.8, 112.1, 81.7, 73.2, 72.8, 71.5, 59.6, 56.0, 52.9, 38.9, 33.8, 22.1; IR (KBr)  $\nu$  2928, 2230, 2155, 1647, 1509, 1362, 1260, 1168, 958, 754  $\text{cm}^{-1}$ ; HRMS-(ESI) ( $m/z$ ):  $[\text{M}+\text{Na}]^+$  calcd for  $\text{C}_{23}\text{H}_{25}\text{NNaO}_4\text{S}$ , 434.1396; found 434.1397.

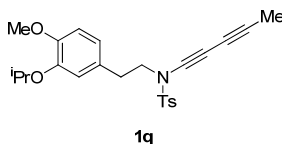

**N-(3-isopropoxy-4-methoxyphenethyl)-N-(phenylbuta-1,3-diyne-1-yl)methanesulfonamide (1q)**

Compound **1q** was obtained according to the general procedure outlined above as a yellow oil (256 mg, 62%);  $R_f = 0.5$  (petroleum ether : ethyl acetate = 3 : 1);  $^1\text{H}$  NMR (400 MHz,  $\text{CDCl}_3$ )  $\delta$  7.66 (d,  $J = 8.0$  Hz, 2H), 7.28 (d,  $J = 8.0$  Hz, 2H), 6.75 (d,  $J = 8.0$  Hz, 1H), 6.69-6.66 (m, 2H), 4.50-4.44 (m, 1H), 3.80 (s, 3H), 3.53 (t,  $J = 8.0$  Hz, 2H), 2.83 (t,  $J = 7.6$  Hz, 2H), 2.41 (s, 3H), 1.96 (s, 3H), 1.34 (d,  $J = 6.0$  Hz, 6H);  $^{13}\text{C}$  NMR (100 MHz,  $\text{CDCl}_3$ )  $\delta$  149.1, 147.0, 144.7, 134.2, 129.6, 129.4, 127.2, 121.1, 116.5, 111.9,

79.6, 71.2, 66.3, 63.5, 59.0, 55.7, 52.5, 33.5, 21.9, 21.4, 4.3; IR (KBr)  $\nu$  2925, 2848, 2372, 2168, 1699, 1506, 1366, 1167, 1027, 655, 575, 417  $\text{cm}^{-1}$ ; HRMS (ESI)  $m/z$ :  $[\text{M} + \text{Na}]^+$  calcd for  $\text{C}_{24}\text{H}_{27}\text{NNaO}_4\text{S}$ , 448.1553; found 448.1552.

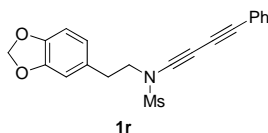

**N-(2-(benzo[d][1,3]dioxol-5-yl)ethyl)-N-(phenylbuta-1,3-diyne-1-yl)methanesulfonamide (1r)**

Compound **1r** was obtained according to the general procedure B outlined above as a yellow oil (462 mg, 84%);  $R_f$  = 0.35 (petroleum ether : ethyl acetate = 3 : 1);  $^1\text{H}$  NMR (400 MHz,  $\text{CDCl}_3$ )  $\delta$  7.50 (dd,  $J_1$  = 8.0 Hz,  $J_2$  = 2.0 Hz, 2H), 7.36-7.31 (m, 3H), 6.78-6.72 (m, 3H), 5.93 (s, 2H), 3.74 (t,  $J$  = 7.2 Hz, 2H), 2.97 (t,  $J$  = 7.2 Hz, 2H), 2.83 (s, 3H);  $^{13}\text{C}$  NMR (100 MHz,  $\text{CDCl}_3$ )  $\delta$  147.9, 146.6, 132.3, 130.8, 129.1, 128.4, 122.1, 121.8, 109.4, 108.5, 101.0, 87.8, 73.1, 72.7, 59.6, 52.9, 39.1, 34.2; IR (KBr)  $\nu$  3135, 3112, 1639, 1619, 1402, 617  $\text{cm}^{-1}$ ; HRMS-(ESI) ( $m/z$ ):  $[\text{M} + \text{Na}]^+$  calcd for  $\text{C}_{20}\text{H}_{17}\text{NNaO}_4\text{S}$ , 390.0770; found 390.0767.

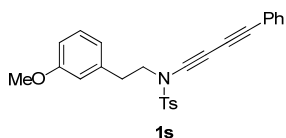

**N-(3-methoxyphenethyl)-4-methyl-N-(phenylbuta-1,3-diyne-1-yl)benzenesulfonamide (1s)**

Compound **1s** was obtained according to the general procedure A outlined above as a yellow oil (373 mg, 58%);  $R_f$  = 0.60 (petroleum ether : ethyl acetate = 5 : 1);  $^1\text{H}$  NMR (400 MHz,  $\text{CDCl}_3$ )  $\delta$  7.72 (d,  $J$  = 8.4 Hz, 2H), 7.49 (dd,  $J_1$  = 7.6 Hz,  $J_2$  = 1.6 Hz, 2H), 7.35-7.30 (m, 5H), 7.18 (t,  $J$  = 8.0 Hz, 1H), 6.76 (dd,  $J_1$  = 8.0 Hz,  $J_2$  = 2.4 Hz, 2H), 6.69

(d,  $J = 1.6$  Hz, 1H), 3.76 (s, 3H), 3.61 (t,  $J = 8.0$  Hz, 2H), 2.93 (t,  $J = 8.0$  Hz, 2H), 2.43 (s, 3H);  $^{13}\text{C}$  NMR (100 MHz,  $\text{CDCl}_3$ )  $\delta$  159.7, 145.0, 138.6, 134.4, 132.3, 129.9, 129.6, 129.0, 128.4, 127.5, 122.0, 121.1, 114.4, 112.3, 81.3, 73.7, 73.5, 58.9, 55.1, 52.6, 34.4, 21.6; IR (KBr)  $\nu$  2991, 2364, 1618, 1401, 1167, 617, 480  $\text{cm}^{-1}$ ; HRMS-(ESI) ( $m/z$ ):  $[\text{M}+\text{Na}]^+$  calcd for  $\text{C}_{26}\text{H}_{23}\text{NNaO}_3\text{S}$ , 452.1291; found 452.1290.

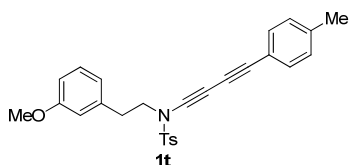

**N-(3-methoxyphenethyl)-4-methyl-N-(p-tolylbuta-1,3-diyn-1-yl)benzenesulfonamide (1t)**

Compound **1t** was obtained according to the general procedure A outlined above as a yellow solid (435 mg, 67%);  $R_f = 0.60$  (petroleum ether : ethyl acetate = 5 : 1); mp: 136–138  $^{\circ}\text{C}$ ;  $^1\text{H}$  NMR (400 MHz,  $\text{CDCl}_3$ )  $\delta$  7.73 (d,  $J = 8.0$  Hz, 2H), 7.39 (d,  $J = 8.4$  Hz, 2H), 7.31 (d,  $J = 8.4$  Hz, 2H), 7.18 (t,  $J = 8.0$  Hz, 1H), 7.13 (d,  $J = 8.0$  Hz, 2H), 6.77–6.75 (m, 2H), 6.69 (d,  $J = 2.0$  Hz, 1H), 3.77 (s, 3H), 3.61 (t,  $J = 8.0$  Hz, 2H), 2.93 (t,  $J = 8.0$  Hz, 2H), 2.44 (s, 3H), 2.36 (s, 3H);  $^{13}\text{C}$  NMR (100 MHz,  $\text{CDCl}_3$ )  $\delta$  159.7, 145.0, 139.4, 138.7, 134.5, 132.3, 129.9, 129.6, 129.2, 127.5, 121.1, 118.9, 114.4, 112.4, 81.6, 73.4, 72.9, 59.1, 55.1, 52.7, 34.4, 21.7, 21.6; IR (KBr)  $\nu$  2837, 2235, 2154, 1580, 1370, 1265, 1174, 1030, 771, 680, 547  $\text{cm}^{-1}$ ; HRMS-(ESI) ( $m/z$ ):  $[\text{M}+\text{Na}]^+$  calcd for  $\text{C}_{27}\text{H}_{25}\text{NNaO}_3\text{S}$ , 466.1447; found 466.1448.

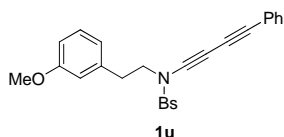

**N-(3-methoxyphenethyl)-N-(phenylbuta-1,3-diyn-1-yl)benzenesulfonamide (1u)**

Compound **1u** was obtained according to the general procedure A outlined above as a yellow solid (510 mg, 82%);  $R_f = 0.50$  (petroleum ether : ethyl acetate = 5 : 1); mp: 113-115 °C;  $^1\text{H}$  NMR (400 MHz,  $\text{CDCl}_3$ )  $\delta$  7.85-7.83 (m, 2H), 7.65-7.61 (m, 1H), 7.53-7.47 (m, 4H), 7.36-7.28 (m, 3H), 7.17 (t,  $J = 8.0$  Hz, 1H), 6.76-6.73 (m, 2H), 6.69 (t,  $J = 2.0$  Hz, 1H), 3.75 (s, 3H), 3.63 (t,  $J = 7.6$  Hz, 2H), 2.92 (t,  $J = 8.0$  Hz, 2H);  $^{13}\text{C}$  NMR (100 MHz,  $\text{CDCl}_3$ )  $\delta$  159.6, 138.4, 137.3, 133.8, 132.3, 129.6, 129.3, 129.0, 128.3, 127.4, 121.8, 121.0, 114.4, 112.3, 81.3, 73.5, 73.4, 59.0, 55.0, 52.6, 34.3; IR (KBr)  $\nu$  2949, 2837, 2224, 2151, 1612, 1492, 1398, 1258, 1044, 887, 733, 694, 603, 452  $\text{cm}^{-1}$ ; HRMS-(ESI) ( $m/z$ ):  $[\text{M}+\text{Na}]^+$  calcd for  $\text{C}_{25}\text{H}_{21}\text{NNaO}_3\text{S}$ , 438.1134; found 438.1134.

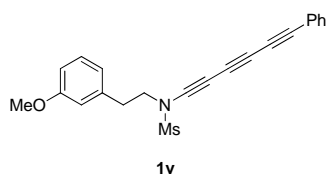

**N-(3-methoxyphenethyl)-N-(phenylhexa-1,3,5-triyn-1-yl)methanesulfonamide (1v)**

Compound **1v** was obtained according to the general procedure A outlined above as a yellow oil (306 mg, 51%);  $R_f = 0.40$  (petroleum ether : ethyl acetate = 5 : 1);  $^1\text{H}$  NMR (400 MHz,  $\text{CDCl}_3$ )  $\delta$  7.52 (d,  $J = 7.2$  Hz, 2H), 7.38 (d,  $J = 7.2$  Hz, 1H), 7.33 (t,  $J = 7.2$  Hz, 2H), 7.27-7.23 (m, 1H), 6.86 (d,  $J = 7.6$  Hz, 1H), 6.81 (d,  $J = 6.4$  Hz, 2H), 3.81 (s, 3H), 3.80 (t,  $J = 7.2$  Hz, 2H), 3.01 (t,  $J = 7.2$  Hz, 2H), 2.70 (s, 3H);  $^{13}\text{C}$  NMR (100 MHz,  $\text{CDCl}_3$ )  $\delta$  159.9, 138.6, 132.9, 129.8, 129.6, 128.5, 121.3, 121.0, 114.7, 112.7, 79.0, 74.4, 69.9, 67.5, 65.8, 61.3, 55.2, 52.7, 39.2, 34.4; IR (KBr)  $\nu$  2939, 2368, 2200, 1688, 1366, 1261, 1167, 957, 757, 687, 505  $\text{cm}^{-1}$ ; HRMS-(ESI) ( $m/z$ ):  $[\text{M}+\text{Na}]^+$  calcd for  $\text{C}_{22}\text{H}_{19}\text{NNaO}_3\text{S}$ , 400.0978; found 400.0968.

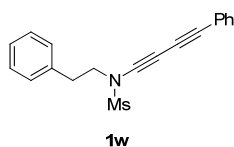

**N-phenethyl-N-(phenylbuta-1,3-diyne-1-yl)methanesulfonamide (1w)**

Compound **1w** was obtained according to the general procedure A outlined above as a yellow oil (363 mg, 75%);  $R_f = 0.50$  (petroleum ether : ethyl acetate = 3 : 1);  $^1\text{H}$  NMR (400 MHz,  $\text{CDCl}_3$ )  $\delta$  7.51-7.49 (m, 2H), 7.36-7.25 (m, 8H), 3.79 (t,  $J = 7.2$  Hz, 2H), 3.04 (t,  $J = 7.2$  Hz, 2H), 2.65 (s, 3H);  $^{13}\text{C}$  NMR (100 MHz,  $\text{CDCl}_3$ )  $\delta$  137.3, 132.3, 129.10, 129.05, 128.7, 128.4, 127.1, 121.8, 81.7, 73.2, 72.7, 59.6, 52.7, 38.8, 34.3; IR (KBr)  $\nu$  3303, 3016, 2932, 2228, 2161, 823, 753, 687  $\text{cm}^{-1}$ ; HRMS-(ESI) ( $m/z$ ):  $[\text{M}+\text{Na}]^+$  calcd for  $\text{C}_{19}\text{H}_{17}\text{NNaO}_2\text{S}$ , 346.0872; found 346.0872.

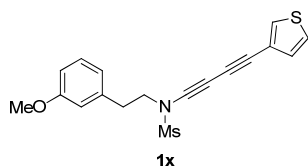

**N-(3-methoxyphenethyl)-N-(thiophen-3-ylbuta-1,3-diyne-1-yl)methanesulfonamide (1x)**

Compound **1x** was obtained according to the general procedure A outlined above as a yellow solid (340 mg, 63%);  $R_f = 0.40$  (petroleum ether : ethyl acetate = 5 : 1), mp: 155-158  $^{\circ}\text{C}$ ;  $^1\text{H}$  NMR (400 MHz,  $\text{CDCl}_3$ )  $\delta$  7.56 (dd,  $J_1 = 2.8$  Hz,  $J_2 = 1.2$  Hz, 1H), 7.28-7.25 (m, 1H), 7.25-7.22 (m, 1H), 7.15 (dd,  $J_1 = 5.2$  Hz,  $J_2 = 1.2$  Hz, 1H), 6.86 (d,  $J = 7.6$  Hz, 1H), 6.82-6.78 (m, 2H), 3.80 (s, 3H), 3.78 (t,  $J = 7.2$  Hz, 2H), 3.02 (t,  $J = 7.2$  Hz, 2H), 2.72 (s, 3H);  $^{13}\text{C}$  NMR (100 MHz,  $\text{CDCl}_3$ )  $\delta$  159.9, 138.8, 131.2, 130.1, 129.8, 125.6, 121.4, 120.9, 114.7, 112.6, 76.9, 72.8, 72.6, 59.7, 55.2, 52.7, 38.9, 34.4; IR (KBr)  $\nu$  2911,

2224, 2154, 1597, 1513, 1366, 1223, 1167, 964, 834, 767, 515  $\text{cm}^{-1}$ ; HRMS-(ESI) ( $m/z$ ):  $[\text{M}+\text{Na}]^+$  calcd for  $\text{C}_{18}\text{H}_{17}\text{NNaO}_3\text{S}_2$ , 382.0542; found 382.0542.

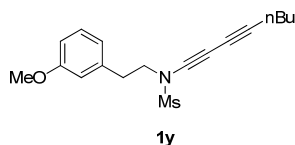

**N-(3-methoxyphenethyl)-N-(octa-1,3-diyn-1-yl)methanesulfonamide (1y)**

Compound **1y** was obtained according to the general procedure A outlined above as a yellow oil (370 mg, 74%);  $R_f$  = 0.50 (petroleum ether : ethyl acetate = 5 : 1);  $^1\text{H}$  NMR (400 MHz,  $\text{CDCl}_3$ )  $\delta$  7.23 (t,  $J$  = 7.6 Hz, 1H), 6.85 (d,  $J$  = 7.6 Hz, 1H), 6.80-6.78 (m, 2H), 3.81 (s, 3H), 3.74 (t,  $J$  = 7.2 Hz, 2H), 2.99 (t,  $J$  = 7.2 Hz, 2H), 2.71 (s, 3H), 2.34 (t,  $J$  = 7.2 Hz, 2H), 1.59-1.51 (m, 2H), 1.48-1.41 (m, 2H), 0.93 (t,  $J$  = 7.2 Hz, 3H);  $^{13}\text{C}$  NMR (100 MHz,  $\text{CDCl}_3$ )  $\delta$  159.8, 138.9, 129.7, 121.3, 114.7, 112.6, 84.8, 66.0, 64.1, 60.0, 55.2, 52.5, 38.7, 34.4, 30.3, 21.9, 19.2, 13.5; IR (KBr)  $\nu$  3005, 2364, 2168, 1622, 1405, 1160, 960, 624, 477  $\text{cm}^{-1}$ ; HRMS-(ESI) ( $m/z$ ):  $[\text{M}+\text{Na}]^+$  calcd for  $\text{C}_{18}\text{H}_{23}\text{NNaO}_3\text{S}$ , 356.1291; found 356.1292.

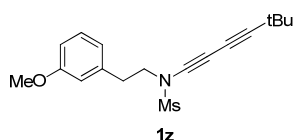

**N-(5,5-dimethylhexa-1,3-diyn-1-yl)-N-(3-methoxyphenethyl)methanesulfonamide (1z)**

Compound **1z** was obtained according to the general procedure A outlined above as a yellow oil (275 mg, 55%);  $R_f$  = 0.50 (petroleum ether : ethyl acetate = 5 : 1);  $^1\text{H}$  NMR (400 MHz,  $\text{CDCl}_3$ )  $\delta$  7.23 (t,  $J$  = 8.0 Hz, 1H), 6.85 (d,  $J$  = 7.2 Hz, 1H), 6.79 (d,  $J$  = 10.0 Hz, 2H), 3.80 (s, 3H), 3.73 (t,  $J$  = 7.2 Hz, 2H), 2.99 (t,  $J$  = 7.2 Hz, 2H), 2.71 (s, 3H), 1.27

(s, 9H);  $^{13}\text{C}$  NMR (100 MHz,  $\text{CDCl}_3$ )  $\delta$  159.8, 138.9, 129.7, 121.3, 114.7, 112.5, 92.0, 67.2, 62.8, 59.6, 55.2, 52.5, 38.7, 34.4, 30.5, 28.2; IR (KBr)  $\nu$  2970, 2252, 2154, 1604, 1359, 1265, 1163, 1044, 767, 501  $\text{cm}^{-1}$ ;  $[\text{M}+\text{Na}]^+$  calcd for  $\text{C}_{18}\text{H}_{23}\text{NNaO}_3\text{S}$ , 356.1291; found 356.1288.

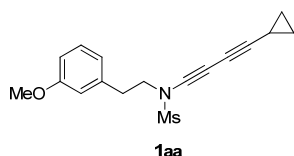

**N-(cyclopropylbuta-1,3-diyn-1-yl)-N-(3-methoxyphenethyl)methanesulfonamide  
(1aa)**

Compound **1aa** was obtained according to the general procedure A outlined above as a yellow solid (328 mg, 69%);  $R_f$  = 0.40 (petroleum ether : ethyl acetate = 5 : 1), mp: 118-120  $^{\circ}\text{C}$ ;  $^1\text{H}$  NMR (400 MHz,  $\text{CDCl}_3$ )  $\delta$  7.23 (t,  $J$  = 8.0 Hz, 1H), 6.84 (d,  $J$  = 7.6 Hz, 1H), 6.80-6.78 (m, 2H), 3.81 (s, 3H), 3.73 (t,  $J$  = 7.2 Hz, 2H), 2.99 (t,  $J$  = 7.2 Hz, 2H), 2.70 (s, 3H), 1.42-1.35 (m, 1H), 0.87-0.85 (m, 2H), 0.83-0.80 (m, 2H);  $^{13}\text{C}$  NMR (100 MHz,  $\text{CDCl}_3$ )  $\delta$  159.8, 138.9, 129.7, 121.3, 114.7, 112.5, 88.1, 65.7, 60.4, 59.6, 55.2, 52.5, 38.7, 34.3, 9.0, 0.3; IR (KBr)  $\nu$  2939, 2833, 2343, 2238, 2158, 1615, 1580, 1492, 1398, 1254, 1156, 1068, 943, 747, 687, 634, 515, 463  $\text{cm}^{-1}$ ; HRMS-(ESI) ( $m/z$ ):  $[\text{M}+\text{Na}]^+$  calcd for  $\text{C}_{17}\text{H}_{19}\text{NNaO}_3\text{S}$ , 340.0978; found 340.0979.

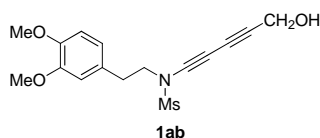

**N-(3,4-dimethoxyphenethyl)-N-(5-hydroxypenta-1,3-diyn-1-yl)methanesulfonamide  
(1ab)**



Compound **1ab** was obtained according to the general procedure A outlined above as a yellow oil (430 mg, 85%);  $R_f = 0.3$  (petroleum ether : ethyl acetate = 2 : 1);  $^1\text{H}$  NMR (400 MHz,  $\text{CDCl}_3$ )  $\delta$  6.82-6.77 (m, 3H), 4.38 (s, 2H), 3.88 (s, 3H), 3.84 (s, 3H), 3.74 (t,  $J = 7.2$  Hz, 2H), 2.95 (t,  $J = 7.2$  Hz, 2H), 2.71 (s, 3H);  $^{13}\text{C}$  NMR (100 MHz,  $\text{CDCl}_3$ )  $\delta$  148.8, 147.8, 129.4, 121.0, 112.0, 111.2, 81.5, 69.8, 69.1, 59.0, 55.7, 52.5, 51.1, 38.7, 33.7; IR (KBr)  $\nu$  2914, 2245, 1643, 1517, 1363, 1160, 1023, 757, 526  $\text{cm}^{-1}$ ; HRMS-(ESI) ( $m/z$ ):  $[\text{M}+\text{Na}]^+$  calcd for  $\text{C}_{16}\text{H}_{19}\text{NNaO}_5\text{S}$ , 360.0876; found 360.0873.

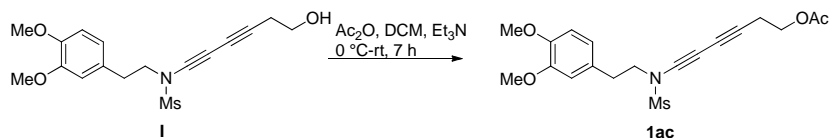

### **N-(3,4-dimethoxyphenethyl)-N-(6-hydroxyhexa-1,3-diyne-1-yl)methanesulfonamide**

#### **(I)**

Compound **I** was obtained according to the general procedure A outlined above as a yellow oil (253 mg, 50%);  $R_f = 0.20$  (petroleum ether : ethyl acetate = 1 : 1);  $^1\text{H}$  NMR (400 MHz,  $\text{CDCl}_3$ )  $\delta$  6.83-6.79 (m, 3H), 3.88 (s, 3H), 3.84 (s, 3H), 3.75 (t,  $J = 6.4$  Hz, 2H), 3.71 (t,  $J = 7.2$  Hz, 2H), 2.94 (t,  $J = 7.2$  Hz, 2H), 2.74 (s, 3H), 2.60 (t,  $J = 6.4$  Hz, 2H);  $^{13}\text{C}$  NMR (100 MHz,  $\text{CDCl}_3$ )  $\delta$  150.0, 148.0, 129.6, 121.1, 112.2, 111.3, 81.2, 66.7, 65.8, 60.6, 59.6, 55.8, 52.6, 38.8, 33.9, 23.9; IR (KBr)  $\nu$  2932, 2256, 2172, 1643, 1517, 1359, 1261, 1170, 1026, 960, 771, 536  $\text{cm}^{-1}$ ; HRMS-(ESI) ( $m/z$ ):  $[\text{M}+\text{Na}]^+$  calcd for  $\text{C}_{17}\text{H}_{21}\text{NNaO}_5\text{S}$ , 374.1033; found 374.1033.

### **6-(N-(3,4-dimethoxyphenethyl)methylsulfonamido)hexa-3,5-diyne-1-yl acetate (1ac)**

A solution of **I** (425 mg, 1.26 mmol) in DCM (15 mL) at 0 °C was added  $\text{Et}_3\text{N}$  (0.70 mL, 5.0 mmol). Then acetic anhydride (257 mg, 2.52 mmol) was added drop-wise via syringe at this temperature. The mixture was allowed to warm up to room temperature and stirred

for 7 h. The reaction was diluted with DCM (20 mL) and water (20 mL), the organic layer was separated and the aqueous layer was extracted with DCM (3 × 20 mL). The combined organic layers were washed with brine, dried over anhydrous Na<sub>2</sub>SO<sub>4</sub> and concentrated in vacuo to furnish the product as a yellow oil (255 mg, 59%); R<sub>f</sub> = 0.35 (petroleum ether : ethyl acetate = 1 : 1); <sup>1</sup>H NMR (400 MHz, CDCl<sub>3</sub>) δ 6.84-6.79 (m, 3H), 4.18 (t, *J* = 6.8 Hz, 2H), 3.88 (s, 3H), 3.85 (s, 3H), 3.72 (t, *J* = 6.8 Hz, 2H), 2.96 (t, *J* = 6.8 Hz, 2H), 2.73 (s, 3H), 2.69 (t, *J* = 6.8 Hz, 2H), 2.09 (s, 3H); <sup>13</sup>C NMR (100 MHz, CDCl<sub>3</sub>) δ 170.5, 148.8, 147.9, 129.5, 120.9, 112.0, 111.2, 79.8, 66.8, 65.5, 61.5, 59.4, 55.7, 52.4, 38.6, 33.7, 20.6, 19.8; IR (KBr) ν 3170, 2537, 2252, 2165, 1739, 1517, 1400, 1240, 1026 cm<sup>-1</sup>; HRMS-(ESI) (*m/z*): [M+Na]<sup>+</sup> calcd for C<sub>19</sub>H<sub>23</sub>NNaO<sub>6</sub>S, 416.1138; found 416.1138.<sup>7</sup>

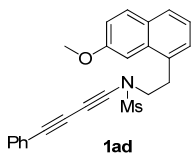

**N-(2-(7-methoxynaphthalen-1-yl)ethyl)-N-(phenylbuta-1,3-diyn-1-yl)methanesulfonamide (1ad)**

Compound **1ad** was obtained according to the general procedure B outlined above as a yellow solid (210 mg, 70%); R<sub>f</sub> = 0.40 (petroleum ether : ethyl acetate = 5 : 1), mp: 105-108 °C; <sup>1</sup>H NMR (400 MHz, CDCl<sub>3</sub>) δ 7.76 (d, *J* = 8.8 Hz, 1H), 7.70 (d, *J* = 8.0 Hz, 1H), 7.51 (d, *J* = 7.2 Hz, 2H), 7.41-7.25 (m, 6H), 7.18-7.16 (m, 1H), 3.99 (s, 3H), 3.87 (d, *J* = 8.0 Hz, 2H), 3.51 (d, *J* = 8.0 Hz, 2H), 2.85 (s, 3H); <sup>13</sup>C NMR (100 MHz, CDCl<sub>3</sub>) δ 158.3, 132.8, 132.4, 131.5, 130.4, 129.24, 129.18, 128.5, 128.0, 127.7, 123.2, 121.8, 118.8, 101.4, 81.9, 73.2, 73.1, 59.3, 55.4, 52.3, 39.3, 32.6; IR (KBr) ν 2921, 2361, 1468, 1307,

1146, 964, 768, 554  $\text{cm}^{-1}$ ; HRMS-(ESI) ( $m/z$ ):  $[\text{M}+\text{Na}]^+$  calcd for  $\text{C}_{24}\text{H}_{21}\text{NNaO}_3\text{S}$ , 426.1134; found 426.1135.

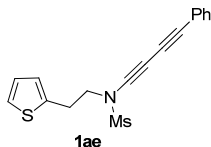

**N-(phenylbuta-1,3-diyn-1-yl)-N-(2-(thiophen-2-yl)ethyl)methanesulfonamide (1ae)**

Compound **1ae** was obtained according to the general procedure B outlined above as a yellow solid (576 mg, 87%);  $R_f = 0.50$  (petroleum ether : ethyl acetate = 5 : 1), mp: 90-93  $^{\circ}\text{C}$ ;  $^1\text{H}$  NMR (400 MHz,  $\text{CDCl}_3$ )  $\delta$  7.52-7.49 (m, 2H), 7.38-7.30 (m, 3H), 7.21-7.19 (m, 1H), 6.98-6.96 (m, 2H), 3.82 (t,  $J = 7.2$  Hz, 2H), 3.28 (t,  $J = 7.2$  Hz, 2H), 2.82 (s, 3H);  $^{13}\text{C}$  NMR (100 MHz,  $\text{CDCl}_3$ )  $\delta$  139.1, 132.4, 129.1, 128.4, 127.2, 126.5, 124.6, 121.8, 81.8, 73.1, 72.4, 59.8, 52.7, 39.0, 28.5; IR (KBr)  $\nu$  2925, 2364, 2221, 1594, 1493, 1366, 1156, 964, 761, 547, 512  $\text{cm}^{-1}$ ; HRMS-(ESI) ( $m/z$ ):  $[\text{M}+\text{Na}]^+$  calcd for  $\text{C}_{17}\text{H}_{15}\text{NNaO}_2\text{S}_2$ , 352.0436; found 352.0439.

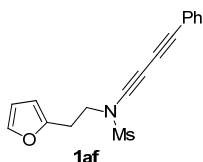

**N-(2-(furan-2-yl)ethyl)-N-(phenylbuta-1,3-diyn-1-yl)methanesulfonamide (1af)**

Compound **1af** was obtained according to the general procedure B outlined above as a yellow oil (253 mg, 67%);  $R_f = 0.40$  (petroleum ether : ethyl acetate = 5 : 1);  $^1\text{H}$  NMR (400 MHz,  $\text{CDCl}_3$ )  $\delta$  7.50-7.47 (m, 2H), 7.37-7.30 (m, 4H), 6.33-6.31 (m, 1H), 6.22-6.21 (m, 1H), 3.82 (t,  $J = 6.8$  Hz, 2H), 3.09 (t,  $J = 6.8$  Hz, 2H), 2.89 (s, 3H);  $^{13}\text{C}$  NMR (100 MHz,  $\text{CDCl}_3$ )  $\delta$  150.8, 141.8, 132.3, 129.1, 128.4, 121.8, 110.6, 107.8, 81.7, 73.1, 72.4, 59.3, 49.9, 39.1, 27.0; IR (KBr)  $\nu$  3026, 2231, 1769, 1493, 1317, 1146, 1076, 970, 764,

522  $\text{cm}^{-1}$ ; HRMS-(ESI) ( $m/z$ ):  $[\text{M}+\text{Na}]^+$  calcd for  $\text{C}_{17}\text{H}_{15}\text{NNaO}_3\text{S}$ , 336.0665; found 336.0664.

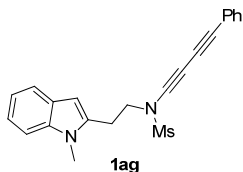

**N-(2-(1-methyl-1H-indol-2-yl)ethyl)-N-(phenylbuta-1,3-diyne-1-yl)methanesulfonamide (1ag)**

Compound **1ag** was obtained according to the general procedure B outlined above as a yellow oil (328 mg, 67%);  $R_f$  = 0.40 (petroleum ether : ethyl acetate = 5 : 1);  $^1\text{H}$  NMR (400 MHz,  $\text{CDCl}_3$ )  $\delta$  7.54 (d,  $J$  = 7.6 Hz, 1H), 7.50-7.48 (m, 2H), 7.38-7.29 (m, 4H), 7.21-7.17 (m, 1H), 7.10-7.06 (m, 1H), 6.39 (s, 1H), 3.86 (t,  $J$  = 7.2 Hz, 2H), 3.71 (s, 3H), 3.22 (t,  $J$  = 7.2 Hz, 2H), 2.81 (s, 3H);  $^{13}\text{C}$  NMR (100 MHz,  $\text{CDCl}_3$ )  $\delta$  137.5, 135.3, 132.4, 129.2, 128.4, 127.5, 121.7, 121.4, 120.1, 119.7, 109.1, 100.9, 81.9, 73.0, 72.6, 59.6, 50.7, 39.2, 29.6, 26.0; IR (KBr)  $\nu$  2983, 2883, 2399, 2207, 1482, 1388, 1179, 991, 724, 512  $\text{cm}^{-1}$ ; HRMS-(ESI) ( $m/z$ ):  $[\text{M}+\text{Na}]^+$  calcd for  $\text{C}_{22}\text{H}_{20}\text{N}_2\text{NaO}_2\text{S}$ , 399.1138; found 399.1138.

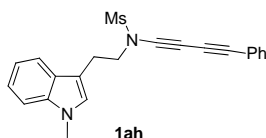

**N-(2-(1-methyl-1H-indol-3-yl)ethyl)-N-(phenylbuta-1,3-diyne-1-yl)methanesulfonamide (1ah)**

Compound **1ah** was obtained according to the general procedure B outlined above as a yellow oil (563 mg, 83%);  $R_f$  = 0.40 (petroleum ether : ethyl acetate = 5 : 1);  $^1\text{H}$  NMR (400 MHz,  $\text{CDCl}_3$ )  $\delta$  7.55 (d,  $J$  = 8.0 Hz, 1H), 7.42-7.28 (m, 6H), 7.19 (t,  $J$  = 7.6 Hz, 1H), 7.09 (t,  $J$  = 7.2 Hz, 1H), 6.40 (s, 1H), 3.88 (t,  $J$  = 7.2 Hz, 2H), 3.73 (s, 3H), 3.24 (t,  $J$  =

7.2 Hz, 2H), 2.82 (s, 3H);  $^{13}\text{C}$  NMR (100 MHz,  $\text{CDCl}_3$ )  $\delta$  137.5, 135.33, 135.28, 133.6, 128.8, 127.5, 121.5, 120.3, 120.2, 119.7, 109.1, 101.0, 80.8, 74.0, 73.1, 59.5, 50.7, 39.3, 29.7, 26.1; IR (KBr)  $\nu$  2983, 2883, 2399, 2207, 1482, 1388, 1179, 991, 724, 512, 463  $\text{cm}^{-1}$ ; HRMS-(ESI) ( $m/z$ ):  $[\text{M}+\text{Na}]^+$  calcd for  $\text{C}_{22}\text{H}_{20}\text{N}_2\text{NaO}_2\text{S}$ , 399.1138; found 399.1137.

## General procedure for the synthesis of Pyrrolo [2,1-a] isoquinolines

A dry Schlenk tube was charged with gold catalyst (5 mol %) and evacuated and back filled with argon. To this tube was added the solution of 1,3-diynamide (0.15 mmol) in DCM (1 mL). The reaction mixture was stirred at 30 °C or 40 °C and the progress of the reaction was monitored by TLC. The reaction typically took 4 h. Upon completion, the mixture was then quenched with small amount of water, diluted with DCM, washed with brine, dried over anhydrous Na<sub>2</sub>SO<sub>4</sub> and concentrated in vacuo. The residue was purified by chromatography on silica gel (eluent : petroleum ether/DCM) to afford the desired pyrrolo [2, 1-a] isoquinolines **2**.

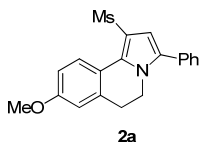

### 8-methoxy-1-(methylsulfonyl)-3-phenyl-5,6-dihydropyrrolo[2,1-a]isoquinoline (**2a**)

Compound **2a** was obtained as a white solid, 45.8 mg, in 87% yield;  $R_f$  = 0.50 (petroleum ether : ethyl acetate = 3 : 1); mp: 212-214 °C; <sup>1</sup>H NMR (400 MHz, CDCl<sub>3</sub>)  $\delta$  8.44 (d,  $J$  = 8.8 Hz, 1H), 7.47-7.43 (m, 2H), 7.39-7.36 (m, 3H), 6.92 (dd,  $J_1$  = 8.8 Hz,  $J_2$  = 2.8 Hz, 1H), 6.81 (d,  $J$  = 2.4 Hz, 1H), 6.77 (s, 1H), 4.08 (t,  $J$  = 6.4 Hz, 2H), 3.85 (s, 3H), 3.10 (s, 3H), 2.96 (t,  $J$  = 6.4 Hz, 2H); <sup>13</sup>C NMR (100 MHz, CDCl<sub>3</sub>)  $\delta$  159.4, 135.4, 132.6, 130.9, 130.2, 128.9, 128.62, 128.57, 127.9, 120.2, 119.1, 113.7, 112.7, 110.9, 55.3, 43.8, 42.2, 30.0; IR (KBr)  $\nu$  2932, 2231, 2154, 1601, 1493, 1370, 1265, 1170, 964, 764, 694, 512 cm<sup>-1</sup>; HRMS-(ESI) ( $m/z$ ): [M+Na]<sup>+</sup> calcd for C<sub>20</sub>H<sub>19</sub>NNaO<sub>3</sub>S, 376.0978; found 376.0976.

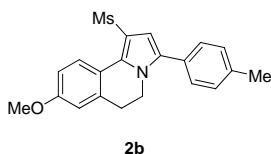

**8-methoxy-1-(methylsulfonyl)-3-(p-tolyl)-5,6-dihydropyrrolo[2,1-a]isoquinoline (2b)**

Compound **2b** was obtained as a white solid, 46.0 mg, in 83% yield;  $R_f$  = 0.60 (petroleum ether : ethyl acetate = 3 : 1); mp: 216-218 °C;  $^1\text{H}$  NMR (400 MHz,  $\text{CDCl}_3$ )  $\delta$  8.44 (d,  $J$  = 8.8 Hz, 1H), 7.26 (appeared as a singlet, 4H), 6.92 (dd,  $J_1$  = 8.8 Hz,  $J_2$  = 2.0 Hz, 1H), 6.81 (s, 1H), 6.74 (s, 1H), 4.07 (t,  $J$  = 6.4 Hz, 2H), 3.85 (s, 3H), 3.10 (s, 3H), 2.95 (t,  $J$  = 6.4 Hz, 2H), 2.41 (s, 3H);  $^{13}\text{C}$  NMR (100 MHz,  $\text{CDCl}_3$ )  $\delta$  159.4, 138.0, 135.4, 132.8, 130.0, 129.4, 128.9, 128.6, 128.0, 120.3, 119.1, 113.8, 112.7, 110.6, 55.3, 43.9, 42.2, 30.0, 21.2; IR (KBr)  $\nu$  2837, 2361, 1902, 1608, 1496, 1394, 1132, 946, 827, 767, 543  $\text{cm}^{-1}$ ; HRMS-(ESI) ( $m/z$ ):  $[\text{M}+\text{Na}]^+$  calcd for  $\text{C}_{21}\text{H}_{21}\text{NNaO}_3\text{S}$ , 390.1134; found 390.1129.

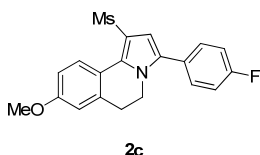

**3-(4-fluorophenyl)-8-methoxy-1-(methylsulfonyl)-5,6-dihydropyrrolo[2,1-a]isoquinoline (2c)**

Compound **2c** was obtained as a white solid, 49.5 mg, in 89% yield;  $R_f$  = 0.50 (petroleum ether : ethyl acetate = 3 : 1); mp: 211-213 °C;  $^1\text{H}$  NMR (400 MHz,  $\text{CDCl}_3$ )  $\delta$  8.44 (d,  $J$  = 8.4 Hz, 1H), 7.34 (dd,  $J_1$  = 8.0 Hz,  $J_2$  = 5.6 Hz, 2H), 7.14 (t,  $J$  = 8.4 Hz, 2H), 6.93 (dd,  $J_1$  = 8.4 Hz,  $J_2$  = 2.0 Hz, 1H), 6.82 (s, 1H), 6.74 (s, 1H), 4.04 (t,  $J$  = 6.4 Hz, 2H), 3.85 (s, 3H), 3.10 (s, 3H), 2.97 (t,  $J$  = 6.4 Hz, 2H);  $^{13}\text{C}$  NMR (100 MHz,  $\text{CDCl}_3$ )  $\delta$  162.5 (d,  $J_{\text{C-F}}$  = 123.5 Hz), 159.5, 135.3, 131.6, 130.8 (d,  $J_{\text{C-F}}$  = 8.2 Hz), 130.2, 128.7, 127.1 (d,  $J_{\text{C-F}}$  = 3.3 Hz), 120.1, 119.1, 115.7 (d,  $J_{\text{C-F}}$  = 21.6 Hz), 113.81, 112.7, 111.0, 55.3, 43.8, 42.1,

30.0;  $^{19}\text{F}$  NMR (376 MHz,  $\text{CDCl}_3$ )  $\delta$  -113.2; IR (KBr)  $\nu$  2921, 2368, 1611, 1496, 1391, 1135, 953, 837, 767, 655, 526, 480  $\text{cm}^{-1}$ ; HRMS-(ESI) ( $m/z$ ):  $[\text{M}+\text{Na}]^+$  calcd for  $\text{C}_{20}\text{H}_{18}\text{FNNaO}_3\text{S}$ , 394.0884; found 394.0887.

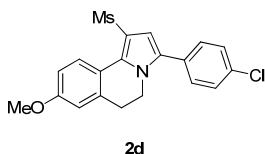

**3-(4-chlorophenyl)-8-methoxy-1-(methylsulfonyl)-5,6-dihydropyrrolo[2,1-a]isoquinoline (2d)**

Compound **2d** was obtained as a white solid, 41.8 mg, in 72% yield;  $R_f$  = 0.80 (petroleum ether : ethyl acetate = 3 : 1); mp: 211-213  $^{\circ}\text{C}$ ;  $^1\text{H}$  NMR (400 MHz,  $\text{CDCl}_3$ )  $\delta$  8.45 (d,  $J$  = 8.8 Hz, 1H), 7.43 (d,  $J$  = 8.4 Hz, 2H), 7.31 (d,  $J$  = 8.4 Hz, 2H), 6.93 (dd,  $J_1$  = 8.8 Hz,  $J_2$  = 2.8 Hz, 1H), 6.82 (d,  $J$  = 2.4 Hz, 1H), 6.78 (s, 1H), 4.06 (t,  $J$  = 6.4 Hz, 2H), 3.86 (s, 3H), 3.10 (s, 3H), 2.97 (t,  $J$  = 6.4 Hz, 2H);  $^{13}\text{C}$  NMR (100 MHz,  $\text{CDCl}_3$ )  $\delta$  159.5, 135.3, 134.0, 131.4, 130.5, 130.1, 129.3, 128.9, 128.6, 120.0, 119.3, 113.8, 112.7, 111.2, 55.3, 43.8, 42.2, 29.9; IR (KBr)  $\nu$  3009, 2364, 1615, 1394, 1296, 1146, 816, 617, 484  $\text{cm}^{-1}$ ; HRMS-(ESI) ( $m/z$ ):  $[\text{M}+\text{Na}]^+$  calcd for  $\text{C}_{20}\text{H}_{18}\text{ClNNaO}_3\text{S}$ , 410.0588; found 410.0588.

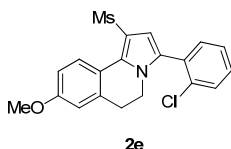

**3-(2-chlorophenyl)-8-methoxy-1-(methylsulfonyl)-5,6-dihydropyrrolo[2,1-a]isoquinoline (2e)**

Compound **2e** was obtained as a white solid, 37.2 mg, in 64% yield;  $R_f$  = 0.70 (petroleum ether : ethyl acetate = 3 : 1); mp: 195-197  $^{\circ}\text{C}$ ;  $^1\text{H}$  NMR (400 MHz,  $\text{CDCl}_3$ )  $\delta$  8.47 (d,  $J$  = 8.8 Hz, 1H), 7.50 (d,  $J$  = 7.2 Hz, 1H), 7.40-7.35 (m, 3H), 6.93 (dd,  $J_1$  = 8.4 Hz,  $J_2$  = 2.4



Hz, 1H), 6.81 (d,  $J = 2.4$  Hz, 1H), 6.72 (s, 1H), 3.85 (appeared as a singlet, 5H), 3.12 (s, 3H), 2.98 (t,  $J = 6.4$  Hz, 2H);  $^{13}\text{C}$  NMR (100 MHz,  $\text{CDCl}_3$ )  $\delta$  159.4, 135.4, 135.0, 132.9, 130.24, 130.25, 130.0, 129.7, 129.4, 128.7, 127.0, 120.1, 118.7, 113.9, 112.7, 112.0, 55.3, 43.9, 42.4, 29.8; IR (KBr)  $\nu$  3117, 2960, 2837, 1604, 1520, 1468, 1293, 1237, 1132, 1030, 981, 844, 760, 554  $\text{cm}^{-1}$ ; HRMS-(ESI) ( $m/z$ ):  $[\text{M}+\text{Na}]^+$  calcd for  $\text{C}_{20}\text{H}_{18}\text{ClNNaO}_3\text{S}$ , 410.0588; found 410.0588.

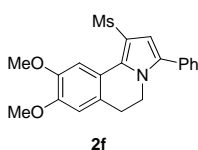

**8,9-dimethoxy-1-(methylsulfonyl)-3-phenyl-5,6-dihydropyrrolo[2,1-a]isoquinoline (2f)**

Compound **2f** was obtained as a white solid, 48.8 mg, in 85% yield;  $R_f = 0.60$  (petroleum ether : ethyl acetate = 3 : 1); mp: 224-226  $^{\circ}\text{C}$ ;  $^1\text{H}$  NMR (400 MHz,  $\text{CDCl}_3$ )  $\delta$  8.31 (s, 1H), 7.48-7.44 (m, 2H), 7.41-7.38 (m, 3H), 6.78 (d,  $J = 1.6$  Hz, 2H), 4.10 (t,  $J = 6.4$  Hz, 2H), 3.98 (s, 3H), 3.93 (s, 3H), 3.10 (s, 3H), 2.94 (t,  $J = 6.4$  Hz, 2H);  $^{13}\text{C}$  NMR (100 MHz,  $\text{CDCl}_3$ )  $\delta$  148.7, 148.3, 132.7, 130.9, 130.2, 129.0, 128.7, 128.0, 126.2, 120.0, 119.2, 111.1, 110.8, 110.4, 56.2, 55.9, 44.0, 42.5, 29.2; IR (KBr)  $\nu$  2834, 2364, 1615, 1394, 1132, 890, 768, 610, 463  $\text{cm}^{-1}$ ; HRMS-(ESI) ( $m/z$ ):  $[\text{M}+\text{Na}]^+$  calcd for  $\text{C}_{21}\text{H}_{21}\text{NNaO}_4\text{S}$ , 406.1083; found 406.1083.

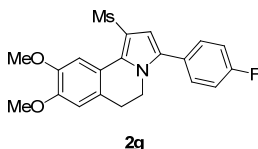

**3-(4-fluorophenyl)-8,9-dimethoxy-1-(methylsulfonyl)-5,6-dihydropyrrolo[2,1-a]isoquinoline (2g)**

Compound **2g** was obtained as a white solid, 42.1 mg, in 70% yield;  $R_f = 0.60$  (petroleum ether : ethyl acetate = 3 : 1); mp: 228-230 °C;  $^1\text{H}$  NMR (400 MHz,  $\text{CDCl}_3$ )  $\delta$  8.30 (s, 1H), 7.35 (dd,  $J_1 = 8.4$  Hz,  $J_2 = 5.6$  Hz, 2H), 7.15 (t,  $J = 8.8$  Hz, 2H), 6.76 (d,  $J = 14.0$  Hz, 2H), 4.05 (t,  $J = 6.8$  Hz, 2H), 3.97 (s, 3H), 3.93 (s, 3H), 3.10 (s, 3H), 2.95 (t,  $J = 6.8$  Hz, 2H);  $^{13}\text{C}$  NMR (100 MHz,  $\text{CDCl}_3$ )  $\delta$  162.6 (d,  $J_{\text{C-F}} = 246.9$  Hz), 148.8, 148.4, 131.6, 130.8 (d,  $J_{\text{C-F}} = 8.2$  Hz), 130.2, 127.0 (d,  $J_{\text{C-F}} = 3.4$  Hz), 126.1, 119.9, 119.2, 115.8 (d,  $J_{\text{C-F}} = 21.6$  Hz), 111.1, 110.9, 110.4, 56.2, 56.0, 44.0, 42.4, 29.2;  $^{19}\text{F}$  NMR (376 MHz,  $\text{CDCl}_3$ )  $\delta$  -113.2; IR (KBr)  $\nu$  2837, 2361, 1615, 1499, 1394, 1265, 995, 837, 795, 557, 456  $\text{cm}^{-1}$ ; HRMS-(ESI) ( $m/z$ ):  $[\text{M}+\text{Na}]^+$  calcd for  $\text{C}_{21}\text{H}_{20}\text{FNNaO}_4\text{S}$ , 424.0989; found 424.0988.

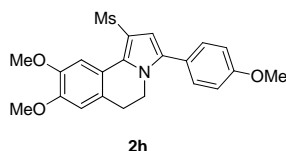

**8,9-dimethoxy-3-(4-methoxyphenyl)-1-(methylsulfonyl)-5,6-dihydropyrrolo[2,1-a]isoquinoline (2h)**

Compound **2h** was obtained as a white solid, 34.1 mg, in 55% yield;  $R_f = 0.45$  (petroleum ether : ethyl acetate = 3 : 1); mp: 243-245 °C;  $^1\text{H}$  NMR (400 MHz,  $\text{CDCl}_3$ )  $\delta$  8.29 (s, 1H), 7.30 (t,  $J = 8.4$  Hz, 2H), 6.77 (s, 1H), 6.71 (s, 1H), 4.05 (t,  $J = 6.4$  Hz, 2H), 3.97 (s, 3H), 3.93 (s, 3H), 3.86 (s, 3H), 3.10 (s, 3H), 2.93 (t,  $J = 6.4$  Hz, 2H);  $^{13}\text{C}$  NMR (100 MHz,  $\text{CDCl}_3$ )  $\delta$  159.5, 148.6, 148.3, 132.6, 130.3, 129.8, 126.1, 123.3, 120.1, 119.0, 114.1, 110.8, 110.5, 110.4, 56.2, 55.9, 55.4, 44.0, 42.3, 29.2; IR (KBr)  $\nu$  3137, 2923, 1549, 1499, 1402, 1278, 1127, 891, 806, 762, 550  $\text{cm}^{-1}$ ; HRMS-(ESI) ( $m/z$ ):  $[\text{M}+\text{Na}]^+$  calcd for  $\text{C}_{22}\text{H}_{23}\text{NNaO}_5\text{S}$ , 436.1189; found 436.1187.

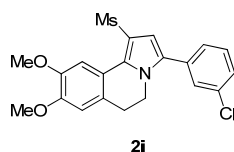

**3-(3-chlorophenyl)-8,9-dimethoxy-1-(methylsulfonyl)-5,6-dihydropyrrolo[2,1-a]isoquinoline (2i)**

Compound **2i** was obtained as a white solid, 45.7 mg, in 73% yield;  $R_f$  = 0.60 (petroleum ether : ethyl acetate = 3 : 1); mp: 213-215 °C;  $^1\text{H}$  NMR (400 MHz,  $\text{CDCl}_3$ )  $\delta$  8.30 (s, 1H), 7.41-7.36 (m, 3H), 7.27 (d,  $J$  = 4.4 Hz, 1H), 6.79 (d,  $J$  = 6.4 Hz, 2H), 4.09 (t,  $J$  = 6.4 Hz, 2H), 3.97 (s, 3H), 3.94 (s, 3H), 3.09 (s, 3H), 2.96 (t,  $J$  = 6.4 Hz, 2H);  $^{13}\text{C}$  NMR (100 MHz,  $\text{CDCl}_3$ )  $\delta$  148.9, 148.4, 134.6, 132.7, 131.2, 130.7, 130.0, 128.9, 128.1, 127.1, 126.1, 119.8, 119.5, 111.8, 110.8, 110.5, 56.3, 56.0, 44.0, 42.6, 29.2; IR (KBr)  $\nu$  3002, 2354, 1611, 1398, 1131, 1002, 620, 557  $\text{cm}^{-1}$ ; HRMS-(ESI) ( $m/z$ ):  $[\text{M}+\text{Na}]^+$  calcd for  $\text{C}_{21}\text{H}_{20}\text{ClNNaO}_4\text{S}$ , 440.0694; found 440.0694.

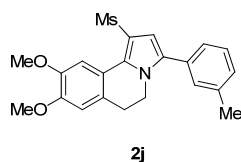

**8,9-dimethoxy-1-(methylsulfonyl)-3-(m-tolyl)-5,6-dihydropyrrolo[2,1-a]isoquinoline (2j)**

Compound **2j** was obtained as a white solid, 46.4 mg, in 78% yield;  $R_f$  = 0.60 (petroleum ether : ethyl acetate = 3 : 1); mp: 237-239 °C;  $^1\text{H}$  NMR (400 MHz,  $\text{CDCl}_3$ )  $\delta$  8.30 (s, 1H), 7.34 (t,  $J$  = 8.0 Hz, 1H), 7.21-7.19 (m, 2H), 7.17 (d,  $J$  = 7.8 Hz, 1H), 6.78 (s, 1H), 6.76 (s, 1H), 4.09 (t,  $J$  = 7.2 Hz, 2H), 3.97 (s, 3H), 3.93 (s, 3H), 3.10 (s, 3H), 2.93 (t,  $J$  = 6.8 Hz, 2H), 2.41 (s, 3H);  $^{13}\text{C}$  NMR (100 MHz,  $\text{CDCl}_3$ )  $\delta$  148.7, 148.3, 138.4, 129.7, 128.8, 128.5, 126.2, 126.0, 120.0, 119.1, 111.1, 110.8, 110.4, 56.2, 55.9, 44.0, 42.5, 29.2, 21.4;

IR (KBr)  $\nu$  3122, 1532, 1402, 1190, 1133, 983  $\text{cm}^{-1}$ ; HRMS-(ESI) ( $m/z$ ):  $[\text{M}+\text{Na}]^+$  calcd for  $\text{C}_{22}\text{H}_{23}\text{NNaO}_4\text{S}$ , 420.1240; found 420.1241.

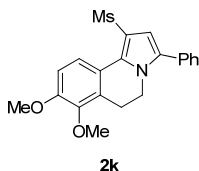

**7,8-dimethoxy-1-(methylsulfonyl)-3-phenyl-5,6-dihydropyrrolo[2,1-a]isoquinoline (2k)**

Compound **2k** was obtained as a white solid, 50.6 mg, in 88% yield;  $R_f$  = 0.75 (petroleum ether : ethyl acetate = 3 : 1); mp: 238-240  $^{\circ}\text{C}$ ;  $^1\text{H}$  NMR (400 MHz,  $\text{CDCl}_3$ )  $\delta$  8.25 (d,  $J$  = 8.8 Hz, 1H), 7.48-7.44 (m, 2H), 7.41-7.37 (m, 3H), 6.95 (d,  $J$  = 8.4 Hz, 1H), 6.78 (s, 1H), 4.07 (t,  $J$  = 6.4 Hz, 2H), 3.93 (s, 3H), 3.84 (s, 3H), 3.11 (s, 3H), 3.05 (t,  $J$  = 6.4 Hz, 2H);  $^{13}\text{C}$  NMR (100 MHz,  $\text{CDCl}_3$ )  $\delta$  152.5, 145.5, 132.7, 130.9, 130.0, 128.9, 128.6, 127.92, 127.85, 123.4, 120.7, 119.3, 111.0, 110.9, 60.7, 55.7, 43.7, 42.1, 22.8; IR (KBr)  $\nu$  2924, 2851, 2357, 1601, 1489, 1272, 1139, 957, 806, 767, 694, 564, 449  $\text{cm}^{-1}$ ; HRMS-(ESI) ( $m/z$ ):  $[\text{M}+\text{Na}]^+$  calcd for  $\text{C}_{21}\text{H}_{21}\text{NNaO}_4\text{S}$ , 406.1083; found 406.1084.

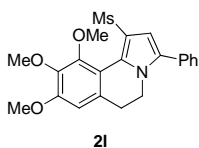

**8,9,10-trimethoxy-1-(methylsulfonyl)-3-phenyl-5,6-dihydropyrrolo[2,1-a]isoquinoline (2l)**

Compound **2l** was obtained as a white solid, 50.2 mg, in 81% yield,  $R_f$  = 0.40 (petroleum ether : ethyl acetate = 3 : 1); mp: 243-245  $^{\circ}\text{C}$ ;  $^1\text{H}$  NMR (400 MHz,  $\text{CDCl}_3$ )  $\delta$  7.47-7.40 (m, 4H), 7.39-7.37 (m, 1H), 6.78 (s, 1H), 6.59 (s, 1H), 4.00 (t,  $J$  = 6.0 Hz, 2H), 3.95 (s, 3H), 3.88 (s, 3H), 3.85 (s, 3H), 3.31 (s, 3H), 2.75 (t,  $J$  = 6.0 Hz, 2H);  $^{13}\text{C}$  NMR (100

MHz, CDCl<sub>3</sub>)  $\delta$  153.6, 151.5, 140.9, 134.0, 131.9, 130.9, 128.9, 128.7, 128.6, 127.8, 121.3, 114.7, 110.3, 106.4, 61.3, 60.7, 56.1, 43.1, 42.4, 31.0; IR (KBr)  $\nu$  2930, 1599, 1484, 1420, 1293, 996, 846, 762, 550 cm<sup>-1</sup>; HRMS-(ESI) ( $m/z$ ): [M+Na]<sup>+</sup> calcd for C<sub>22</sub>H<sub>23</sub>NNaO<sub>5</sub>S, 436.1189; found 436.1191.

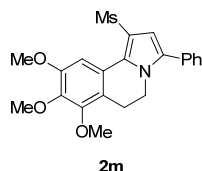

**7,8,9-trimethoxy-1-(methylsulfonyl)-3-phenyl-5,6-dihydropyrrolo[2,1-*a*]isoquinoline (2m)**

Compound **2m** was obtained as a white solid, 21.1 mg, in 34% yield;  $R_f$  = 0.70 (petroleum ether : ethyl acetate = 3 : 1); mp: 259-261 °C; <sup>1</sup>H NMR (400 MHz, CDCl<sub>3</sub>)  $\delta$  8.12 (s, 1H), 7.48-7.44 (m, 2H), 7.41-7.38 (m, 3H), 6.80 (s, 1H), 4.07 (t,  $J$  = 6.4 Hz, 2H), 3.95 (s, 3H), 3.94 (s, 3H), 3.89 (s, 3H), 3.12 (s, 3H), 2.97 (t,  $J$  = 6.4 Hz, 2H); <sup>13</sup>C NMR (100 MHz, CDCl<sub>3</sub>)  $\delta$  152.7, 150.3, 142.0, 133.0, 130.8, 129.7, 129.0, 128.7, 128.1, 123.0, 120.0, 119.6, 111.4, 106.8, 61.1, 61.0, 56.3, 44.0, 42.4, 22.3; IR (KBr)  $\nu$  2921, 2858, 2368, 1720, 1601, 1461, 1293, 1139, 1111, 767, 561, 512 cm<sup>-1</sup>; HRMS-(ESI) ( $m/z$ ): [M+Na]<sup>+</sup> calcd for C<sub>22</sub>H<sub>23</sub>NNaO<sub>5</sub>S, 436.1189; found 436.1188.

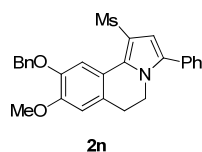

**9-(benzyloxy)-8-methoxy-1-(methylsulfonyl)-3-phenyl-5,6-dihydropyrrolo[2,1-*a*]isoquinoline (2n)**

Compound **2n** was obtained as a white solid, 47.5 mg, in 69% yield;  $R_f$  = 0.75 (petroleum ether : ethyl acetate = 3 : 1); mp: 262-264 °C; <sup>1</sup>H NMR (400 MHz, CDCl<sub>3</sub>)  $\delta$  8.23 (s, 1H),

7.51 (d,  $J = 3.2$  Hz, 2H), 7.45-7.42 (m, 2H), 7.39-7.34 (m, 5H), 7.28-7.26 (m, 1H), 6.79 (s, 1H), 6.73 (s, 1H), 5.32 (s, 2H), 4.05 (t,  $J = 6.4$  Hz, 2H), 3.94 (s, 3H), 3.90 (t,  $J = 6.4$  Hz, 2H), 2.77 (s, 3H);  $^{13}\text{C}$  NMR (100 MHz,  $\text{CDCl}_3$ )  $\delta$  149.2, 147.0, 137.0, 132.7, 130.9, 130.0, 128.9, 128.6, 128.4, 127.9, 127.6, 127.2, 126.5, 119.9, 119.3, 112.0, 111.3, 111.0, 70.1, 56.0, 43.4, 42.4, 29.2; IR (KBr)  $\nu$  2921, 2851, 1527, 1494, 1293, 1270, 1133, 879, 759, 702, 550  $\text{cm}^{-1}$ ; HRMS-(ESI) ( $m/z$ ):  $[\text{M}+\text{Na}]^+$  calcd for  $\text{C}_{27}\text{H}_{25}\text{NNaO}_4\text{S}$ , 482.1397; found 482.1396.

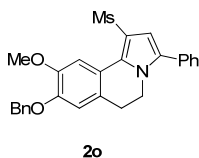

**8-(benzyloxy)-9-methoxy-1-(methylsulfonyl)-3-phenyl-5,6-dihydropyrrolo[2,1-a]isoquinoline (2o)**

Compound **2o** was obtained as a white solid, 42.0 mg, in 61% yield;  $R_f = 0.80$  (petroleum ether : ethyl acetate = 3 : 1); mp: 259-261  $^{\circ}\text{C}$ ;  $^1\text{H}$  NMR (400 MHz,  $\text{CDCl}_3$ )  $\delta$  8.31 (s, 1H), 7.47-7.32 (m, 10H), 6.78 (d,  $J = 6.0$  Hz, 2H), 5.20 (s, 2H), 4.06 (t,  $J = 6.4$  Hz, 2H), 3.98 (s, 3H), 3.10 (s, 3H), 2.87 (t,  $J = 6.4$  Hz, 2H);  $^{13}\text{C}$  NMR (100 MHz,  $\text{CDCl}_3$ )  $\delta$  149.0, 147.8, 136.7, 132.8, 130.9, 130.2, 128.9, 128.64, 128.58, 128.0, 127.9, 127.2, 126.0, 120.5, 119.3, 113.3, 111.1, 110.8, 71.0, 56.3, 44.0, 42.5, 29.1; IR (KBr)  $\nu$  2925, 1652, 1494, 1295, 1130, 803, 763, 697, 550  $\text{cm}^{-1}$ ; HRMS-(ESI) ( $m/z$ ):  $[\text{M}+\text{Na}]^+$  calcd for  $\text{C}_{27}\text{H}_{25}\text{NNaO}_4\text{S}$ , 482.1397; found 482.1393.

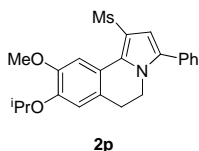

**8-isopropoxy-9-methoxy-1-(methylsulfonyl)-3-phenyl-5,6-dihydropyrrolo[2,1-a]isoquinoline (2p)**

Compound **2p** was obtained as a white solid, 49.3 mg, in 80% yield;  $R_f$  = 0.60 (petroleum ether : ethyl acetate = 3 : 1); mp: 187-189 °C;  $^1\text{H}$  NMR (400 MHz,  $\text{CDCl}_3$ )  $\delta$  8.28 (s, 1H), 7.46-7.43 (m, 2H), 7.43-7.36 (m, 3H), 6.78 (d,  $J$  = 9.6 Hz, 2H), 4.60 (dt,  $J_1$  = 12.0 Hz,  $J_2$  = 6.0 Hz, 1H), 4.08 (t,  $J$  = 6.4 Hz, 2H), 3.94 (s, 3H), 3.10 (s, 3H), 2.91 (t,  $J$  = 6.4 Hz, 2H), 1.41 (d,  $J$  = 6.0 Hz, 6H);  $^{13}\text{C}$  NMR (100 MHz,  $\text{CDCl}_3$ )  $\delta$  149.5, 147.0, 132.6, 130.9, 130.3, 128.9, 128.6, 127.9, 126.0, 120.1, 119.1, 114.7, 111.0, 110.9, 71.4, 56.2, 43.9, 42.5, 29.1, 22.0; IR (KBr)  $\nu$  3135, 3019, 2840, 1608, 1517, 1436, 1335, 1289, 1125, 887, 757, 690, 561, 515, 470  $\text{cm}^{-1}$ ; HRMS-(ESI) ( $m/z$ ):  $[\text{M}+\text{Na}]^+$  calcd for  $\text{C}_{23}\text{H}_{25}\text{NNaO}_4\text{S}$ , 434.1396; found 434.1395.

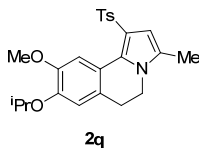

**8-isopropoxy-9-methoxy-3-methyl-1-tosyl-5,6-dihydropyrrolo[2,1-a]isoquinoline (2q)**

Compound **2q** was obtained as a white solid, 37.0 mg, in 58% yield;  $R_f$  = 0.40 (petroleum ether : ethyl acetate = 3 : 1); mp: 209-211 °C;  $^1\text{H}$  NMR (400 MHz,  $\text{CDCl}_3$ )  $\delta$  8.04 (s, 1H), 7.73 (d,  $J$  = 8.0 Hz, 2H), 7.17 (d,  $J$  = 8.0 Hz, 2H), 6.67 (s, 1H), 6.40 (s, 1H), 4.55-4.49 (m, 1H), 3.85-3.83 (m, 5H (O- $\text{CH}_3$  and N- $\text{CH}_2$  overlapped)), 2.85 (t,  $J$  = 6.4 Hz, 2H), 2.33 (s, 3H), 2.21 (s, 3H), 1.35 (d,  $J$  = 6.0 Hz, 6H);  $^{13}\text{C}$  NMR (100 MHz,  $\text{CDCl}_3$ )  $\delta$  149.1, 146.5, 142.8, 141.0, 130.0, 129.2, 127.3, 126.3, 124.9, 120.3, 117.2, 114.6, 111.4, 110.6, 71.3, 56.1, 41.1, 28.7, 22.0, 21.4, 11.8; IR (KBr)  $\nu$  3135, 3019, 2840, 1608, 1517, 1436, 1335, 1289, 1125, 887, 757, 690, 561, 515  $\text{cm}^{-1}$ ; HRMS-(ESI) ( $m/z$ ):  $[\text{M}+\text{Na}]^+$  calcd for  $\text{C}_{24}\text{H}_{27}\text{NNaO}_4\text{S}$ , 448.1553; found 448.1551.

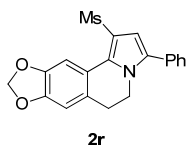

**1-(methylsulfonyl)-3-phenyl-5,6-dihydro-[1,3]dioxolo[4,5-g]pyrrolo[2,1-a]isoquinoline (2r)**

Compound **2r** was obtained as a white solid, 40.2 mg, in 73% yield;  $R_f = 0.70$  (petroleum ether : ethyl acetate = 3 : 1); mp: 251-253 °C;  $^1\text{H}$  NMR (400 MHz,  $\text{CDCl}_3$ )  $\delta$  8.11 (s, 1H), 7.44-7.36 (m, 5H), 6.76 (d,  $J = 11.2$  Hz, 2H), 5.99 (s, 2H), 4.05 (t,  $J = 7.2$  Hz, 2H), 3.11 (s, 3H), 2.88 (t,  $J = 7.2$  Hz, 2H);  $^{13}\text{C}$  NMR (100 MHz,  $\text{CDCl}_3$ )  $\delta$  147.4, 147.2, 132.7, 130.8, 130.0, 128.9, 128.6, 128.1, 128.0, 121.0, 119.5, 111.0, 108.3, 107.6, 101.3, 44.1, 42.3, 29.8; IR (KBr)  $\nu$  3127, 1611, 1489, 1400, 1288, 1133, 781, 704  $\text{cm}^{-1}$ ; HRMS-(ESI) ( $m/z$ ):  $[\text{M}+\text{Na}]^+$  calcd for  $\text{C}_{20}\text{H}_{17}\text{NNaO}_4\text{S}$ , 390.0770; found 390.0764.

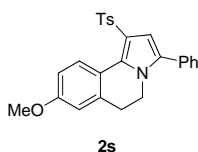

**8-methoxy-3-phenyl-1-tosyl-5,6-dihydropyrrolo[2,1-a]isoquinoline (2s)**

Compound **2s** was obtained as a white solid, 47.0 mg, in 73% yield;  $R_f = 0.40$  (petroleum ether : ethyl acetate = 3 : 1); mp: 218-220 °C;  $^1\text{H}$  NMR (400 MHz,  $\text{CDCl}_3$ )  $\delta$  8.32 (d,  $J = 8.8$  Hz, 1H), 7.84 (d,  $J = 8.0$  Hz, 2H), 7.46-7.42 (m, 2H), 7.39-7.36 (m, 3H), 7.23 (d,  $J = 8.0$  Hz, 2H), 6.85 (dd,  $J_1 = 8.8$  Hz,  $J_2 = 2.8$  Hz, 1H), 6.75 (s, 1H), 6.72 (d,  $J = 2.4$  Hz, 1H), 4.04 (t,  $J = 6.4$  Hz, 2H), 3.83 (s, 3H), 2.88 (t,  $J = 6.4$  Hz, 2H), 2.37 (s, 3H);  $^{13}\text{C}$  NMR (100 MHz,  $\text{CDCl}_3$ )  $\delta$  159.3, 143.1, 140.5, 135.1, 132.7, 131.1, 130.9, 129.40, 129.35, 129.0, 128.6, 127.9, 126.9, 120.1, 119.2, 113.4, 112.2, 111.8, 55.3, 42.3, 30.0, 21.5; IR



(KBr)  $\nu$  3002, 2357, 1615, 1394, 1307, 1149, 1096, 1033, 764, 676, 582, 480  $\text{cm}^{-1}$ ;

HRMS-(ESI) ( $m/z$ ):  $[\text{M}+\text{Na}]^+$  calcd for  $\text{C}_{26}\text{H}_{23}\text{NNaO}_3\text{S}$ , 452.1291; found 452.1291.

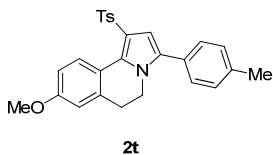

#### 8-methoxy-3-(p-tolyl)-1-tosyl-5,6-dihydropyrrolo[2,1-a]isoquinoline (**2t**)

Compound **2t** was obtained as a white solid, 42.9 mg, in 66% yield;  $R_f$  = 0.40 (petroleum ether : ethyl acetate = 3 : 1); mp: 223-225  $^{\circ}\text{C}$ ;  $^1\text{H}$  NMR (400 MHz,  $\text{CDCl}_3$ )  $\delta$  8.31 (d,  $J$  = 8.8 Hz, 1H), 7.83 (d,  $J$  = 8.0 Hz, 2H), 7.26-7.21 (m, 6H), 6.84 (dd,  $J_1$  = 8.8 Hz,  $J_2$  = 2.4 Hz, 1H), 6.71 (s, 2H), 4.01 (t,  $J$  = 6.4 Hz, 2H), 3.82 (s, 3H), 2.86 (t,  $J$  = 6.4 Hz, 2H), 2.40 (s, 3H), 2.36 (s, 3H);  $^{13}\text{C}$  NMR (100 MHz,  $\text{CDCl}_3$ )  $\delta$  159.2, 143.0, 140.5, 137.9, 135.1, 132.8, 130.7, 129.4, 129.3, 128.9, 128.1, 126.9, 120.2, 119.0, 113.3, 112.1, 111.5, 55.3, 42.2, 30.0, 21.5, 21.2; IR (KBr)  $\nu$  2935, 1611, 1496, 1244, 1146, 1030, 830, 683, 540  $\text{cm}^{-1}$ ; HRMS-(ESI) ( $m/z$ ):  $[\text{M}+\text{Na}]^+$  calcd for  $\text{C}_{27}\text{H}_{25}\text{NNaO}_3\text{S}$ , 466.1447; found 466.1450.

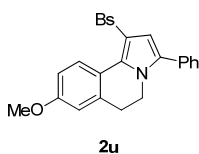

#### 8-methoxy-3-phenyl-1-(phenylsulfonyl)-5,6-dihydropyrrolo[2,1-a]isoquinoline (**2u**)

Compound **2u** was obtained as a white solid, 51.7 mg, in 83% yield;  $R_f$  = 0.40 (petroleum ether : ethyl acetate = 3 : 1); mp: 220-222  $^{\circ}\text{C}$ ;  $^1\text{H}$  NMR (400 MHz,  $\text{CDCl}_3$ )  $\delta$  8.30 (d,  $J$  = 8.8 Hz, 1H), 7.96-7.94 (m, 2H), 7.50-7.43 (m, 5H), 7.39-7.36 (m, 3H), 6.84 (dd,  $J_1$  = 8.8 Hz,  $J_2$  = 2.8 Hz, 1H), 6.78 (s, 1H), 6.72 (d,  $J$  = 2.4 Hz, 1H), 4.04 (t,  $J$  = 8.0 Hz, 2H), 3.82 (s, 3H), 2.88 (t,  $J$  = 8.0 Hz, 2H);  $^{13}\text{C}$  NMR (100 MHz,  $\text{CDCl}_3$ )  $\delta$  159.4, 143.4, 135.2, 132.9, 132.4, 131.2, 131.0, 129.4, 129.0, 128.8, 128.7, 127.9, 126.8, 120.1, 118.7, 113.4,

112.2, 111.9, 55.3, 42.3, 30.0; IR (KBr)  $\nu$  2834, 2354, 2035, 1611, 1405, 1289, 1146, 1030, 831, 732, 592, 484  $\text{cm}^{-1}$ ; HRMS-(ESI) ( $m/z$ ):  $[\text{M}+\text{Na}]^+$  calcd for  $\text{C}_{25}\text{H}_{21}\text{NNaO}_3\text{S}$ , 438.1134; found 438.1128.

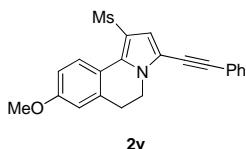

**8-methoxy-1-(methylsulfonyl)-3-(phenylethynyl)-5,6-dihydropyrrolo[2,1-a]isoquinoline (2v)**

Compound **2v** was obtained as a white solid, 31.1 mg, in 55% yield;  $R_f$  = 0.50 (petroleum ether : ethyl acetate = 3 : 1); mp: 179-181  $^{\circ}\text{C}$ ;  $^1\text{H}$  NMR (400 MHz,  $\text{CDCl}_3$ )  $\delta$  8.45 (d,  $J$  = 8.8 Hz, 1H), 7.53-7.51 (m, 2H), 7.37-7.36 (m, 3H), 7.01 (s, 1H), 6.91 (dd,  $J_1$  = 8.8 Hz,  $J_2$  = 2.4 Hz, 1H), 6.83 (d,  $J$  = 2.4 Hz, 1H), 4.22 (t,  $J$  = 6.4 Hz, 2H), 3.85 (s, 3H), 3.07 (t,  $J$  = 6.4 Hz, 2H), 3.07 (s, 3H);  $^{13}\text{C}$  NMR (100 MHz,  $\text{CDCl}_3$ )  $\delta$  159.8, 135.2, 131.3, 130.8, 128.75, 128.67, 128.4, 122.3, 119.5, 119.2, 117.2, 114.13, 114.09, 112.8, 95.2, 78.9, 55.3, 43.9, 42.2, 29.5; IR (KBr)  $\nu$  3019, 2203, 1604, 1517, 1457, 1296, 1135, 1026, 942, 753, 690, 557, 508  $\text{cm}^{-1}$ ; HRMS-(ESI) ( $m/z$ ):  $[\text{M}+\text{Na}]^+$  calcd for  $\text{C}_{22}\text{H}_{19}\text{NNaO}_3\text{S}$ , 400.0978; found 400.0977.

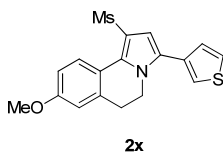

**8-methoxy-1-(methylsulfonyl)-3-(thiophen-3-yl)-5,6-dihydropyrrolo[2,1-a]isoquinoline (2x)**

Compound **2x** was obtained as a white solid, 44.7 mg, in 83% yield;  $R_f$  = 0.70 (petroleum ether : ethyl acetate = 3 : 1); mp: 214-216  $^{\circ}\text{C}$ ;  $^1\text{H}$  NMR (400 MHz,  $\text{CDCl}_3$ )  $\delta$  8.43 (d,  $J$  =

8.4 Hz, 1H), 7.42 (dd,  $J_1 = 4.8$  Hz,  $J_2 = 4.0$  Hz, 1H), 7.26-7.25 (m, 1H), 7.16 (d,  $J = 4.0$  Hz, 1H), 6.92 (dd,  $J_1 = 8.8$  Hz,  $J_2 = 2.8$  Hz, 1H), 6.81 (d,  $J = 2.0$  Hz, 1H), 6.78 (s, 1H), 4.12 (t,  $J = 6.4$  Hz, 2H), 3.85 (s, 3H), 3.09 (s, 3H), 2.98 (t,  $J = 6.4$  Hz, 2H);  $^{13}\text{C}$  NMR (100 MHz,  $\text{CDCl}_3$ )  $\delta$  159.4, 135.2, 131.4, 130.0, 128.6, 128.0, 127.8, 126.3, 123.2, 120.1, 119.0, 113.8, 112.7, 110.9, 55.3, 43.9, 41.9, 29.9; IR (KBr)  $\nu$  3019, 2841, 2357, 1611, 1576, 1471, 1398, 1132, 1030, 946, 859, 816, 760, 550  $\text{cm}^{-1}$ ; HRMS-(ESI) ( $m/z$ ):  $[\text{M}+\text{Na}]^+$  calcd for  $\text{C}_{18}\text{H}_{17}\text{NNaO}_3\text{S}_2$ , 382.0542; found 382.0535.

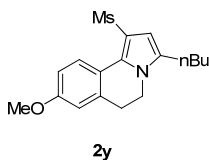

### 3-butyl-8-methoxy-1-(methylsulfonyl)-5,6-dihydropyrrolo[2,1-a]isoquinoline (**2y**)

Compound **2y** was obtained as a white solid, 35.0 mg, in 70% yield;  $R_f = 0.70$  (petroleum ether : ethyl acetate = 3 : 1); mp: 203-205  $^\circ\text{C}$ ;  $^1\text{H}$  NMR (400 MHz,  $\text{CDCl}_3$ )  $\delta$  8.39 (d,  $J = 8.8$  Hz, 1H), 6.89 (dd,  $J_1 = 8.8$  Hz,  $J_2 = 2.4$  Hz, 1H), 6.79 (d,  $J = 2.4$  Hz, 1H), 6.43 (s, 1H), 3.93 (t,  $J = 6.4$  Hz, 2H), 3.84 (s, 3H), 3.04 (s, 3H), 3.00 (t,  $J = 6.4$  Hz, 2H), 2.56 (t,  $J = 7.6$  Hz, 2H), 1.61 (dt,  $J_1 = 15.2$  Hz,  $J_2 = 7.2$  Hz, 2H), 1.42 (dq,  $J_1 = 14.8$  Hz,  $J_2 = 7.2$  Hz, 2H), 0.95 (t,  $J = 7.2$  Hz, 3H);  $^{13}\text{C}$  NMR (100 MHz,  $\text{CDCl}_3$ )  $\delta$  159.0, 134.6, 131.9, 129.1, 128.3, 120.3, 117.7, 113.7, 112.6, 108.6, 55.3, 43.9, 40.8, 30.3, 29.7, 25.7, 22.3, 13.8; IR (KBr)  $\nu$  2928, 2361, 1608, 1517, 1408, 1247, 1142, 1037, 949, 830, 757, 564, 480  $\text{cm}^{-1}$ ; HRMS-(ESI) ( $m/z$ ):  $[\text{M}+\text{Na}]^+$  calcd for  $\text{C}_{18}\text{H}_{23}\text{NNaO}_3\text{S}$ , 356.1291; found 356.1290.

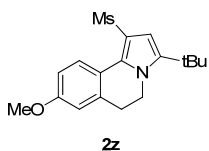

**3-(tert-butyl)-8-methoxy-1-(methylsulfonyl)-5,6-dihydropyrrolo[2,1-a]isoquinoline**

**(2z)**

Compound **2z** was obtained as a white solid, 31.0 mg, in 62% yield;  $R_f = 0.60$  (petroleum ether : ethyl acetate = 3 : 1); mp: 181-183 °C;  $^1\text{H}$  NMR (400 MHz,  $\text{CDCl}_3$ )  $\delta$  8.63 (d,  $J = 8.8$  Hz, 1H), 6.78 (d,  $J = 8.4$  Hz, 1H), 6.68 (s, 1H), 6.08 (s, 1H), 3.83 (s, 3H), 3.80 (t,  $J = 6.0$  Hz, 2H), 2.91 (t,  $J = 6.0$  Hz, 2H), 2.78 (s, 3H), 1.30 (s, 9H);  $^{13}\text{C}$  NMR (100 MHz,  $\text{CDCl}_3$ )  $\delta$  159.8, 139.3, 136.4, 128.9, 123.9, 113.1, 111.9, 107.1, 104.5, 55.3, 45.6, 38.5, 30.6, 29.7, 28.2; IR (KBr)  $\nu$  2960, 2851, 1608, 1492, 1342, 1160, 1020, 963, 869, 736, 578  $\text{cm}^{-1}$ ; HRMS-(ESI) ( $m/z$ ):  $[\text{M}+\text{Na}]^+$  calcd for  $\text{C}_{18}\text{H}_{23}\text{NNaO}_3\text{S}$ , 356.1291; found 356.1292.

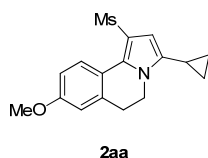

**3-cyclopropyl-8-methoxy-1-(methylsulfonyl)-5,6-dihydropyrrolo[2,1-a]isoquinoline**

**(2aa)**

Compound **2aa** was obtained as a white solid, 38.0 mg, in 80% yield;  $R_f = 0.70$  (petroleum ether : ethyl acetate = 3 : 1); mp: 204-206 °C;  $^1\text{H}$  NMR (400 MHz,  $\text{CDCl}_3$ )  $\delta$  8.39 (d,  $J = 8.8$  Hz, 1H), 6.89 (dd,  $J_1 = 8.8$  Hz,  $J_2 = 2.8$  Hz, 1H), 6.80 (d,  $J = 2.4$  Hz, 1H), 6.34 (d,  $J = 0.4$  Hz, 1H), 4.13 (t,  $J = 6.4$  Hz, 2H), 3.84 (s, 3H), 3.04 (s, 3H), 3.02 (t,  $J = 6.4$  Hz, 2H), 1.71-1.64 (m, 1H), 0.94-0.89 (m, 2H), 0.69-0.65 (m, 2H);  $^{13}\text{C}$  NMR (100 MHz,  $\text{CDCl}_3$ )  $\delta$  159.1, 134.8, 133.7, 129.3, 128.3, 120.3, 117.4, 113.9, 112.6, 108.3, 55.3, 43.9, 41.0, 29.7, 6.4, 5.8; IR (KBr)  $\nu$  3002, 2837, 2361, 1615, 1577, 1524, 1524, 1293, 1090, 984, 823, 767, 645, 543, 508, 435  $\text{cm}^{-1}$ ; HRMS-(ESI) ( $m/z$ ):  $[\text{M}+\text{Na}]^+$  calcd for  $\text{C}_{17}\text{H}_{19}\text{NNaO}_3\text{S}$ , 340.0978; found 340.0978.

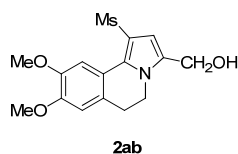

**(8,9-dimethoxy-1-(methylsulfonyl)-5,6-dihydropyrrolo[2,1-a]isoquinolin-3-yl)methanol (2ab)**

Compound **2ab** was obtained as a white solid (21.2 mg, 42%);  $R_f = 0.30$  (petroleum ether : ethyl acetate = 3 : 1); mp: 249-251 °C;  $^1\text{H}$  NMR (400 MHz,  $\text{CDCl}_3$ )  $\delta$  8.22 (s, 1H), 6.75 (s, 1H), 6.60 (s, 1H), 4.61 (s, 2H), 4.12 (t,  $J = 6.8$  Hz, 2H), 3.91 (appeared as doublet as  $\text{O}-\text{CH}_3$  protons overlapped,  $J = 2.4$  Hz, 6H), 3.01-2.96 (appeared as multiplet as  $\text{Ar}-\text{CH}_2$  and  $-\text{SO}_2-\text{CH}_3$  overlapped, 5H);  $^{13}\text{C}$  NMR (100 MHz,  $\text{CDCl}_3$ )  $\delta$  148.8, 148.3, 131.1, 130.1, 126.0, 119.5, 117.7, 111.5, 111.0, 110.3, 56.2, 55.9, 44.0, 41.7, 28.7; IR (KBr)  $\nu$  2914, 2354, 1643, 715, 424  $\text{cm}^{-1}$ ; HRMS-(ESI) ( $m/z$ ):  $[\text{M}+\text{Na}]^+$  calcd for  $\text{C}_{16}\text{H}_{19}\text{NNaO}_5\text{S}$ , 360.0876; found 360.0876.

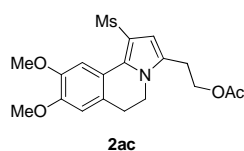

**2-(8,9-dimethoxy-1-(methylsulfonyl)-5,6-dihydropyrrolo[2,1-a]isoquinolin-3-yl)ethyl acetate (2ac)**

Compound **2ac** was obtained as a white solid, 38.9 mg, in 66% yield;  $R_f = 0.22$  (petroleum ether : ethyl acetate = 3 : 1); mp: 239-241 °C;  $^1\text{H}$  NMR (400 MHz,  $\text{CDCl}_3$ )  $\delta$  8.25 (s, 1H), 6.77 (s, 1H), 6.52 (s, 1H), 4.27 (t,  $J = 6.8$  Hz, 2H), 4.00 (t,  $J = 6.8$  Hz, 2H), 3.94 (s, 3H), 3.92 (s, 3H), 3.04 (s, 3H), 3.00 (t,  $J = 6.4$  Hz, 2H), 2.94 (t,  $J = 7.2$  Hz, 2H), 2.07 (s, 3H);  $^{13}\text{C}$  NMR (100 MHz,  $\text{CDCl}_3$ )  $\delta$  170.8, 148.6, 148.3, 129.8, 127.3, 125.4, 119.8, 118.2, 110.8, 110.2, 110.1, 62.6, 56.1, 55.9, 44.0, 41.4, 28.9, 25.6, 20.9; IR (KBr)

$\nu$  3130, 1741, 1529, 1397, 1233, 1233, 1138, 891, 806, 552  $\text{cm}^{-1}$ ; HRMS-(ESI) ( $m/z$ ):

$[\text{M}+\text{Na}]^+$  calcd for  $\text{C}_{19}\text{H}_{23}\text{NNaO}_6\text{S}$ , 416.1138; found 416.1137.

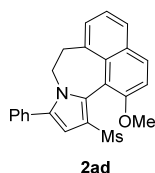

**12-methoxy-1-(methylsulfonyl)-3-phenyl-5,6-dihydronaphtho[1,8-cd]pyrrolo[1,2-a]azepine (2ad)**

Compound **2ad** was obtained as a white solid, 39.0 mg, in 65% yield;  $R_f$  = 0.70 (petroleum ether : ethyl acetate = 3 : 1); mp: 178-180  $^{\circ}\text{C}$ ;  $^1\text{H}$  NMR (400 MHz,  $\text{CDCl}_3$ )  $\delta$  8.53 (d,  $J$  = 8.4 Hz, 1H), 7.80 (t,  $J$  = 8.4 Hz, 2H), 7.50-7.39 (m, 5H), 7.25 (s, 1H), 7.19 (dd,  $J_1$  = 8.0 Hz,  $J_2$  = 2.0 Hz, 1H), 6.88 (s, 1H), 4.22 (t,  $J$  = 6.4 Hz, 2H), 3.95 (s, 3H), 3.33 (t,  $J$  = 6.4 Hz, 2H), 3.11 (s, 3H);  $^{13}\text{C}$  NMR (100 MHz,  $\text{CDCl}_3$ )  $\delta$  158.4, 133.0, 132.0, 130.8, 130.3, 130.2, 128.9, 128.7, 128.5, 128.14, 128.11, 127.5, 125.4, 122.2, 121.2, 118.5, 111.7, 102.3, 55.3, 44.2, 41.9, 25.1; IR (KBr)  $\nu$  2921, 2361, 1468, 1307, 1146, 964, 768, 554, 508, 435  $\text{cm}^{-1}$ ; HRMS-(ESI) ( $m/z$ ):  $[\text{M}+\text{Na}]^+$  calcd for  $\text{C}_{24}\text{H}_{21}\text{NNaO}_3\text{S}$ , 426.1134; found 426.1135.

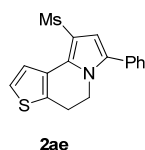

**9-(methylsulfonyl)-7-phenyl-4,5-dihydrothieno[2,3-g]indolizine (2ae)**

Compound **2ae** was obtained as a white solid, 35.0 mg, in 72% yield;  $R_f$  = 0.70 (petroleum ether : ethyl acetate = 3 : 1); mp: 120-122  $^{\circ}\text{C}$ ;  $^1\text{H}$  NMR (400 MHz,  $\text{CDCl}_3$ )  $\delta$  8.01 (d,  $J$  = 5.2 Hz, 1H), 7.48-7.44 (m, 2H), 7.41-7.37 (m, 3H), 7.23 (d,  $J$  = 5.6 Hz, 1H), 6.68 (s, 1H), 4.19 (t,  $J$  = 6.8 Hz, 2H), 3.13 (t,  $J$  = 6.8 Hz, 2H), 3.12 (s, 3H);  $^{13}\text{C}$  NMR

(100 MHz, CDCl<sub>3</sub>)  $\delta$  133.9, 133.4, 131.1, 129.1, 128.7, 128.2, 128.1, 126.3, 123.7, 118.1, 110.2, 44.9, 43.0, 24.5; IR (KBr)  $\nu$  2914, 2368, 1293, 1139, 869, 767, 561, 515, 435 cm<sup>-1</sup>; HRMS-(ESI) ( $m/z$ ): [M+Na]<sup>+</sup> calcd for C<sub>17</sub>H<sub>15</sub>NNaO<sub>2</sub>S<sub>2</sub>, 352.0436; found 352.0436.

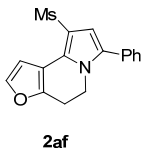

#### 9-(methylsulfonyl)-7-phenyl-4,5-dihydrofuro[2,3-g]indolizine (**2af**)

Compound **2af** was obtained as a white oil, 15.0 mg, in 25% yield;  $R_f$  = 0.70 (petroleum ether : ethyl acetate = 3 : 1); <sup>1</sup>H NMR (400 MHz, CDCl<sub>3</sub>)  $\delta$  7.47-7.37 (m, 6H), 7.21 (s, 1H), 6.58 (s, 1H), 4.23 (t,  $J$  = 7.2 Hz, 2H), 3.11 (s, 3H), 3.09 (t,  $J$  = 7.2 Hz, 2H); <sup>13</sup>C NMR (100 MHz, CDCl<sub>3</sub>)  $\delta$  149.6, 142.5, 133.9, 131.2, 129.0, 128.7, 128.2, 117.8, 112.1, 109.7, 108.9, 45.3, 43.2, 22.8; IR (KBr)  $\nu$  2928, 1758, 1478, 1310, 1135, 764, 561, 522, 435 cm<sup>-1</sup>; HRMS-(ESI) ( $m/z$ ): [M+Na]<sup>+</sup> calcd for C<sub>17</sub>H<sub>15</sub>NNaO<sub>3</sub>S, 336.0665; found 336.0665.

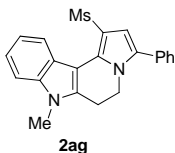

#### 7-methyl-1-(methylsulfonyl)-3-phenyl-6,7-dihydro-5H-indolizino[7,8-b]indole (**2ag**)

Compound **2ag** was obtained as a white solid, 36.6 mg, in 65% yield;  $R_f$  = 0.70 (petroleum ether : ethyl acetate = 3 : 1); mp: 237-239 °C; <sup>1</sup>H NMR (400 MHz, CDCl<sub>3</sub>)  $\delta$  8.65 (dd,  $J_1$  = 6.4,  $J_2$  = 2.4 Hz, 1H), 7.47-7.37 (m, 5H), 7.34-7.26 (m, 3H), 6.77 (s, 1H), 4.14 (t,  $J$  = 6.4 Hz, 2H), 3.74 (s, 3H), 3.16 (s, 3H), 3.02 (t,  $J$  = 6.4 Hz, 2H); <sup>13</sup>C NMR (100 MHz, CDCl<sub>3</sub>)  $\delta$  137.2, 136.9, 132.2, 131.3, 129.2, 128.9, 128.5, 127.7, 123.6, 121.8, 121.4, 120.8, 117.5, 109.3, 109.2, 103.9, 44.4, 41.7, 29.7, 21.6; IR (KBr)  $\nu$  2925, 2368,

2329, 2035, 1398, 1356, 1212, 991, 687, 494  $\text{cm}^{-1}$ ; HRMS-(ESI) ( $m/z$ ):  $[\text{M}+\text{Na}]^+$  calcd for  $\text{C}_{22}\text{H}_{20}\text{N}_2\text{NaO}_2\text{S}$ , 399.1138; found 399.1138.

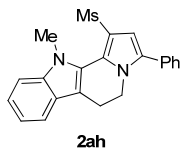

### 11-methyl-1-(methylsulfonyl)-3-phenyl-6,11-dihydro-5H-indolizino[8,7-b]indole

#### (2ah)

Compound **2ah** was obtained as a white solid, 24.7 mg, in 45% yield;  $R_f$  = 0.70 (petroleum ether : ethyl acetate = 3 : 1); mp: 235-237  $^{\circ}\text{C}$ ;  $^1\text{H}$  NMR (400 MHz,  $\text{CDCl}_3$ )  $\delta$  7.55 (d,  $J$  = 8.0 Hz, 1H), 7.50-7.46 (m, 2H), 7.43-7.41 (m, 4H), 7.28 (t,  $J$  = 7.2 Hz, 1H), 7.17 (t,  $J$  = 7.2 Hz, 1H), 6.70 (s, 1H), 4.08 (t,  $J$  = 6.4 Hz, 2H), 3.98 (s, 3H), 3.20 (s, 3H), 2.99 (t,  $J$  = 6.4 Hz, 2H);  $^{13}\text{C}$  NMR (100 MHz,  $\text{CDCl}_3$ )  $\delta$  140.3, 135.8, 130.9, 130.4, 129.1, 128.7, 128.3, 125.5, 124.8, 122.9, 120.3, 119.1, 118.6, 112.6, 110.8, 109.3, 45.2, 43.6, 34.5, 21.9; IR (KBr)  $\nu$  2935, 2848, 2364, 1566, 1457, 1349, 1293, 1132, 1019, 767, 708, 547  $\text{cm}^{-1}$ ; HRMS-(ESI) ( $m/z$ ):  $[\text{M}+\text{Na}]^+$  calcd for  $\text{C}_{22}\text{H}_{20}\text{N}_2\text{NaO}_2\text{S}$ , 399.1138; found 399.1137.

### Crossover experiments

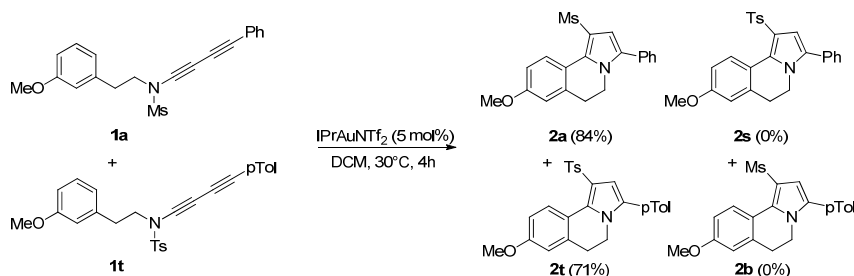



A dry Schlenk tube was charged with gold catalyst (5 mol %) and evacuated and back filled with argon. To this tube was added the solution of **1a** (0.15 mmol) and **1t** (0.15 mmol) in DCM. The reaction mixture was stirred at 30 °C for 4 h. Upon completion, the mixture was then quenched with small amount of water, diluted with DCM, washed with brine, dried over anhydrous Na<sub>2</sub>SO<sub>4</sub> and concentrated in vacuo. The residue was checked by <sup>1</sup>H NMR using as an internal standard.

### Separation of the intermediate **2aa'**

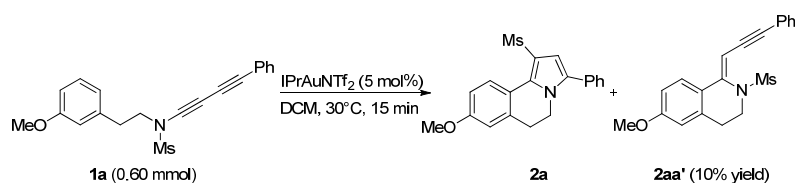

A dry Schlenk tube was charged with gold catalyst (26 mg, 5 mol %) and evacuated and back filled with argon. To this tube was added the solution of **1a** (212 mg, 0.60 mmol) in DCM (4 mL). The reaction mixture was stirred at 30 °C for 15 min. Then the mixture was then quenched with small amount of water, diluted with DCM, washed with brine, dried over anhydrous Na<sub>2</sub>SO<sub>4</sub> and concentrated in vacuo. The residue was purified by chromatography on silica gel (eluent: petroleum ether/DCM) and recrystallized (petroleum ether/DCM) to afford **2aa'** (21 mg, 10%). *R*<sub>f</sub> = 0.35 (petroleum ether : ethyl acetate = 3 : 1); mp: 164-166 °C; <sup>1</sup>H NMR (400 MHz, CDCl<sub>3</sub>) δ 7.55 (d, *J* = 8.8 Hz, 1H), 7.47-7.44 (m, 2H), 7.34-7.32 (m, 3H), 6.78 (dd, *J*<sub>1</sub> = 8.8 Hz, *J*<sub>2</sub> = 2.8 Hz, 1H), 6.63 (d, *J* = 2.8 Hz, 1H), 6.35 (s, 1H), 3.82 (t, *J* = 6.0 Hz, 2H), 3.81 (s, 3H), 3.26 (s, 3H), 3.09 (t, *J* = 6.0 Hz, 2H); <sup>13</sup>C NMR (100 MHz, CDCl<sub>3</sub>) δ 160.3, 142.6, 135.6, 131.3, 128.5, 125.4, 124.0, 123.2, 113.7, 113.6, 101.8, 96.9, 87.7, 55.3, 46.0, 42.2, 28.9; IR (KBr) ν 2916,

1664, 1607, 1342, 1330, 1148, 1108, 970, 759, 520  $\text{cm}^{-1}$ ; HRMS-(ESI) ( $m/z$ ):  $[\text{M}+\text{Na}]^+$  calcd for  $\text{C}_{20}\text{H}_{19}\text{NNaO}_3\text{S}$ , 376.0978; found 376.0979.

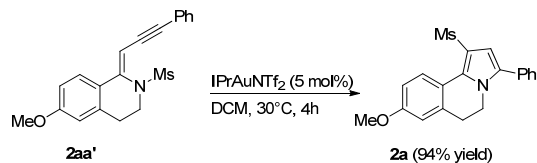

A dry Schlenk tube was charged with gold catalyst (2.6 mg, 5 mol %) and evacuated and back filled with argon. To this tube was added the solution of **2aa'** (21 mg, 0.06 mmol) in DCM (1 mL). The reaction mixture was stirred at 30 °C for 4 h. Then the mixture was then quenched with small amount of water, diluted with DCM, washed with brine, dried over anhydrous  $\text{Na}_2\text{SO}_4$  and concentrated in vacuo. The residue was purified by chromatography on silica gel (eluent: petroleum ether/DCM) to afford **2a** (19.7 mg, 94%).

## Transformations of the products

a)

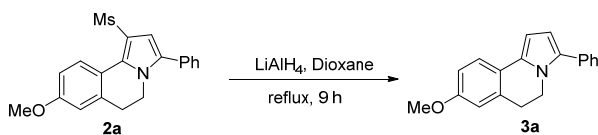

### 8-methoxy-3-phenyl-5,6-dihydropyrrolo[2,1-a]isoquinoline (**3a**)

In a two-neck RB,  $\text{LiAlH}_4$  (40 mg, 0.98 mmol, 7 equiv.) was weighed and 5 mL of dioxane (previously degassed with argon) was added under inert atmosphere. To this suspension solid **2a** (50 mg, 0.14 mmol) was added at room temperature. The mixture was then refluxed for 9 h. The reaction mixture was cooled to 0 °C, diluted by adding 5 mL of ethyl acetate and carefully quenched by saturated  $\text{NH}_4\text{Cl}$  solution. It was then filtered using a short pad of celite and filtrate was then extracted by ethyl acetate ( $3 \times 10$  mL). The combined extracts was washed with brine and dried over  $\text{Na}_2\text{SO}_4$ . The solvent

was removed under reduced pressure and the residual mass was purified by silica gel column chromatography using petroleum ether : ethylacetate (10 : 1) as eluent to afford the pure product **3a** (27.7 mg, 72%);  $R_f$  = 0.70 (petroleum ether : ethyl acetate = 5 : 1); mp: 231-233 °C;  $^1\text{H}$  NMR (400 MHz,  $\text{CDCl}_3$ )  $\delta$  7.50 (d,  $J$  = 8.4 Hz, 1H), 7.43-7.33 (m, 4H), 7.32-7.29 (m, 1H), 6.82 (d,  $J$  = 8.4 Hz, 1H), 6.76 (s, 1H), 6.50 (d,  $J$  = 3.6 Hz, 1H), 6.32 (d,  $J$  = 3.6 Hz, 1H), 4.14 (t,  $J$  = 6.4 Hz, 2H), 3.83 (s, 3H), 3.01 (t,  $J$  = 6.4 Hz, 2H);  $^{13}\text{C}$  NMR (100 MHz,  $\text{CDCl}_3$ )  $\delta$  157.8, 133.6, 133.0, 132.4, 131.1, 128.5, 128.4, 126.6, 123.9, 123.1, 113.2, 112.8, 109.2, 102.8, 55.3, 42.0, 30.0; IR (KBr)  $\nu$  2960, 2364, 1646, 1247, 1034, 806, 536  $\text{cm}^{-1}$ ; HRMS (ESI)  $m/z$ :  $[\text{M} + \text{H}]^+$  calcd for  $\text{C}_{19}\text{H}_{18}\text{NO}$ , 276.1383; found 276.1383.<sup>8</sup>

b)

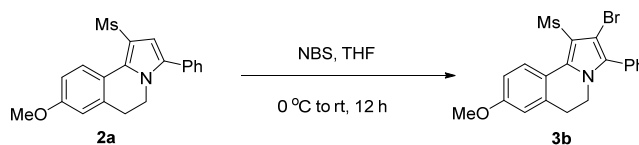

**2-bromo-8-methoxy-1-(methanesulfonyl)-3-phenyl-5,6-dihydro-2,1-benzopyrrolo[2,1-a]isoquinoline (3b)**

To a solution of **2a** (40 mg, 0.11 mmol) in 2 mL of THF, a THF (1 mL) solution of NBS (1.2 equiv.) was added at 0 °C and stirred for 12 h during which the temperature raised to room temperature. The reaction was quenched with water and extracted with DCM (3  $\times$  10 mL). The organic layers were combined, washed with brine and dried over sodium sulfate. The pure product **3b** (45.6 mg, 95%) was obtained by flash column chromatography on silica gel (petroleum ether : DCM = 1 : 1);  $R_f$  = 0.40 (petroleum ether : DCM = 1 : 1); mp: 237-239 °C;  $^1\text{H}$  NMR (400 MHz,  $\text{CDCl}_3$ )  $\delta$  8.19 (d,  $J$  = 8.8 Hz, 1H), 7.51-7.45 (m, 3H), 7.40 (dd,  $J_1$  = 7.6 Hz,  $J_2$  = 1.6 Hz, 2H), 6.90 (dd,  $J_1$  = 8.8 Hz,  $J_2$  =

2.8 Hz, 1H), 6.76 (d,  $J = 2.4$  Hz, 1H), 3.84 (appeared as triplet,  $J = 6.4$  Hz, 5H), 3.30 (s, 3H), 2.87 (t,  $J = 6.4$  Hz, 2H);  $^{13}\text{C}$  NMR (100 MHz,  $\text{CDCl}_3$ )  $\delta$  159.8, 136.2, 132.7, 132.5, 131.3, 130.7, 129.04, 129.00, 128.5, 119.1, 116.7, 113.3, 111.9, 96.2, 55.3, 44.9, 43.0, 30.0; IR (KBr)  $\nu$  2921, 2844, 2368, 1608, 1454, 1303, 1146, 1030, 953.31, 708, 561  $\text{cm}^{-1}$ ; HRMS (ESI)  $m/z$ :  $[\text{M} + \text{Na}]^+$  calcd for  $\text{C}_{20}\text{H}_{18}\text{BrNNaO}_3\text{S}$ , 454.0083; found 454.0081.<sup>9</sup>

c)

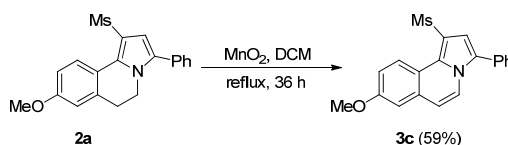

### 8-methoxy-1-(methylsulfonyl)-3-phenylpyrrolo[2,1-a]isoquinoline (**3c**)

A mixture of **2a** (71 mg, 0.20 mmol) and activated  $\text{MnO}_2$  (869 mg, 10 mmol) in dichloromethane (15 mL) was refluxed for 36 h. After cooling to room temperature, the mixture was passed through a pad of Celite and evaporated. The residue was purified by column chromatography eluted by petroleum ether/DCM to give **3c** as a yellow solid (41.7 mg, 59%).  $R_f = 0.25$  (petroleum ether : ethyl acetate = 3 : 1); mp: 187-189  $^\circ\text{C}$ ;  $^1\text{H}$  NMR (400 MHz,  $\text{CDCl}_3$ )  $\delta$  9.12 (d,  $J = 9.2$  Hz, 1H), 8.04 (d,  $J = 7.8$  Hz, 1H), 7.53 (appeared as a singlet, 2H), 7.52 (appeared as a singlet, 2H), 7.48-7.43 (m, 1H), 7.29-7.25 (m, 2H), 7.10 (d,  $J = 2.8$  Hz, 1H), 6.94 (d,  $J = 7.2$  Hz, 1H), 3.94 (s, 3H), 3.26 (s, 3H);  $^{13}\text{C}$  NMR (100 MHz,  $\text{CDCl}_3$ )  $\delta$  159.1, 130.8, 130.4, 129.4, 129.2, 129.1, 128.5, 127.8, 127.4, 122.3, 118.5, 117.8, 115.3, 114.7, 113.7, 108.8, 55.4, 44.3; IR (KBr)  $\nu$  2923, 1647, 1539, 1135, 766  $\text{cm}^{-1}$ ; HRMS-(ESI) ( $m/z$ ):  $[\text{M} + \text{Na}]^+$  calcd for  $\text{C}_{20}\text{H}_{17}\text{NNaO}_3\text{S}$ , 374.0821; found 374.0822.<sup>10</sup>

d)

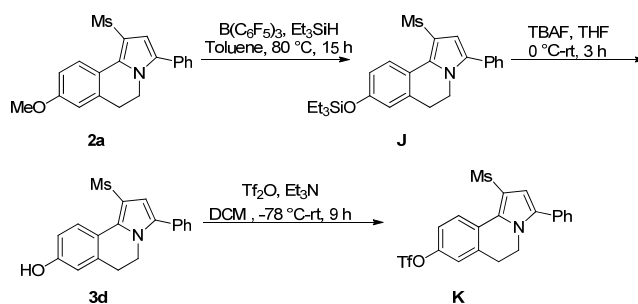

### 1-(methanesulfonyl)-3-phenyl-8-((triethylsilyl)oxy)-5,6-dihydropyrrolo[2,1-a]isoquinoline (**J**)

To a mixture of **2a** (150 mg, 0.42 mmol) and  $\text{B}(\text{C}_6\text{F}_5)_3$  (10 mol%) in toluene (6 mL, degassed with argon),  $\text{Et}_3\text{SiH}$  (5 equiv.) was added at room temperature (immediate bubbling from the reaction mixture observed). It was then refluxed for 7 h during which the initial heterogeneous mixture turned into a yellow solution. The reaction was cooled to rt, diluted by adding 10 mL of ethyl acetate and quenched by saturated  $\text{NH}_4\text{Cl}$  solution. The reaction mixture was partitioned in a separating flask and the aqueous layer was extracted by ethyl acetate ( $3 \times 15$  mL). The combined extracts was washed with brine and dried over  $\text{Na}_2\text{SO}_4$ . The solvent was removed under reduced pressure and the residual mass was purified by silica gel column chromatography using petroleum ether : ethyl acetate (5 : 1) as eluent to give **J** as a yellow oil (138.0 mg, 74%).  $R_f = 0.60$  (petroleum ether : ethyl acetate = 5 : 1);  $^1\text{H}$  NMR (400 MHz,  $\text{CDCl}_3$ )  $\delta$  8.38 (d,  $J = 8.4$  Hz, 1H), 7.47-7.43 (m, 2H), 7.39-7.37 (m, 3H), 6.88 (d,  $J = 8.4$  Hz, 1H), 6.80-6.77 (m, 2H), 4.09 (t,  $J = 6.0$  Hz, 2H), 3.11 (s, 3H), 2.93 (t,  $J = 6.0$  Hz, 2H), 1.03 (t,  $J = 8.0$  Hz, 9H), 0.78 (dd,  $J_1 = 15.6$  Hz,  $J_2 = 8.0$  Hz, 6H);  $^{13}\text{C}$  NMR (100 MHz,  $\text{CDCl}_3$ )  $\delta$  155.7, 135.3, 132.7, 131.0, 130.3, 129.0, 128.7, 128.6, 127.9, 120.7, 119.4, 119.2, 118.9, 111.0, 43.9, 42.3, 31.6, 29.9, 22.6, 14.1, 6.6, 5.0; IR (KBr)  $\nu$  2960, 2872, 2350, 1608, 1457, 1300, 1135, 953, 816, 757,

547  $\text{cm}^{-1}$ ; HRMS-(ESI) ( $m/z$ ):  $[\text{M}+\text{Na}]^+$  calcd for  $\text{C}_{25}\text{H}_{31}\text{NNaO}_3\text{SSi}$ , 476.1686; found 476.1685.

**1-(methanesulfonyl)-3-phenyl-5,6-dihydropyrrolo[2,1-a]isoquinolin-8-ol (3d)**

To a solution of **J** (120 mg, 0.26 mmol) in THF (5 mL), TBAF (0.52 mL, 1M in THF, 0.52 mmol) was added dropwise at 0 °C. The solution was stirred for 2 h during which the temperature gradually increased to room temperature. The reaction was quenched by water and extracted with ethyl acetate ( $3 \times 10$  mL). The combined extracts were washed with brine and dried over  $\text{Na}_2\text{SO}_4$ . The solvent was removed under reduced pressure and the residual mass was purified by silica gel column chromatography using petroleum ether : ethyl acetate (3 : 1) as eluent to give **3d** as a yellow solid (81.2 mg, 92%).  $R_f$  = 0.70 (petroleum ether : ethyl acetate = 5 : 1); mp: 199-201 °C;  $^1\text{H}$  NMR (400 MHz,  $(\text{CD}_3)_2\text{SO}$ )  $\delta$  9.77 (broad singlet, 1H), 8.14 (d,  $J$  = 8.4 Hz, 1H), 7.47 (appeared as doublet,  $J$  = 4.4 Hz, 4H), 7.42-7.36 (m, 1H), 6.78-6.76 (m, 2H), 6.62 (s, 1H), 4.07 (t,  $J$  = 6.4 Hz, 2H), 3.11 (s, 3H), 2.89 (t,  $J$  = 6.4 Hz, 2H);  $^{13}\text{C}$  NMR (100 MHz,  $(\text{CD}_3)_2\text{SO}$ )  $\delta$  158.0, 136.6, 132.5, 131.1, 130.5, 129.2, 128.7, 128.3, 119.2, 118.6, 115.3, 114.5, 110.2, 44.2, 42.5, 29.6; IR (KBr)  $\nu$  3348, 2364, 1611, 1457, 1264, 1132, 985, 767, 550  $\text{cm}^{-1}$ ; HRMS-(ESI) ( $m/z$ ):  $[\text{M}+\text{Na}]^+$  calcd for  $\text{C}_{19}\text{H}_{17}\text{NNaO}_3\text{S}$ , 362.0821; found 362.0820.

**1-(methanesulfonyl)-3-phenyl-5,6-dihydropyrrolo[2,1-a]isoquinolin-8-yl**

**trifluoromethanesulfonate (K)**

**3d** (80 mg, 0.24 mmol) was dissolved in DCM (3.0 mL) and then cooled to -78 °C. Triethylamine (TEA, 70.0  $\mu\text{L}$ , 0.50 mmol) was added, followed by addition of trifluoromethanesulfonic anhydride ( $\text{Tf}_2\text{O}$ , 60.0  $\mu\text{L}$ , 0.53 mmol) within 3 minutes via a syringe. The resulting solution was gradually warmed to room temperature and stirred for

2 h until **3d** had been completely consumed as determined by TLC. The solvent was then removed under reduced pressure to get the crude product, which was purified by flash column chromatography on silica gel, eluted by petroleum ether/DCM to afford the pure product **K** as a yellow solid (100.0 mg, 90% yield).  $R_f = 0.50$  (petroleum ether : ethyl acetate = 5 : 1); mp: 161-163 °C;  $^1\text{H}$  NMR (400 MHz,  $\text{CDCl}_3$ )  $\delta$  8.63 (d,  $J = 8.8$  Hz, 1H), 7.50-7.46 (m, 2H), 7.44-7.42 (m, 1H), 7.41-7.37 (m, 2H), 7.29 (dd,  $J_1 = 8.8$  Hz,  $J_2 = 2.8$  Hz, 1H), 7.22 (d,  $J = 2.4$  Hz, 1H), 6.83 (s, 1H), 4.15 (t,  $J = 6.4$  Hz, 2H), 3.12 (s, 3H), 3.04 (t,  $J = 6.4$  Hz, 2H);  $^{13}\text{C}$  NMR (100 MHz,  $\text{CDCl}_3$ )  $\delta$  148.4, 135.9, 134.1, 130.4, 129.1, 129.0, 128.8, 128.5, 127.8, 127.7, 121.7, 120.8, 120.6, 118.7 (q,  $J_{\text{C-F}} = 319.1$  Hz), 111.8, 44.3, 42.0, 29.7;  $^{19}\text{F}$  NMR (376 MHz,  $\text{CDCl}_3$ )  $\delta$  -72.8; IR (KBr)  $\nu$  2361, 1636, 1422, 1212, 1135, 932, 757, 606  $\text{cm}^{-1}$ ; HRMS-(ESI) ( $m/z$ ):  $[\text{M}+\text{Na}]^+$  calcd for  $\text{C}_{20}\text{H}_{16}\text{F}_3\text{NNaO}_5\text{S}_2$ , 494.0314; found 494.0313.<sup>11</sup>

e)

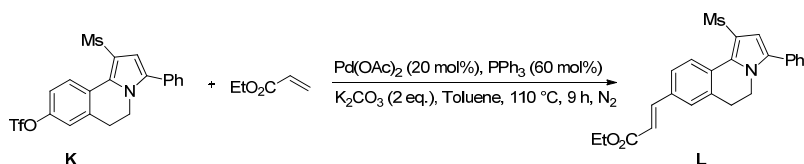

**Ethyl (E)-3-(1-(methylsulfonyl)-3-phenyl-5,6-dihydropyrrolo[2,1-a]isoquinolin-8-yl)acrylate (L)**

**K** (48.0 mg, 0.1 mmol), ethyl acrylate (106.4  $\mu\text{L}$ , 1.0 mmol), palladium(II) acetate ( $\text{Pd}(\text{OAc})_2$ , 4.4 mg, 0.02 mmol), triphenylphosphine ( $\text{PPh}_3$ , 15.7 mg, 0.06 mmol), potassium carbonate ( $\text{K}_2\text{CO}_3$ , 27.6 mg, 0.2 mmol), and toluene (1.0 mL) were added to a pressure tube. The reaction mixture was heated at 110 °C under  $\text{N}_2$  condition for 9 h until **K** had been completely consumed as determined by TLC. The reaction mixture was cooled to room temperature and the solvent was removed under reduced pressure to get

the crude product, which was purified by flash column chromatography on silica gel, eluted by petroleum ether/DCM to afford the pure product **L** as a white solid (36.2 mg, 86% yield).  $R_f = 0.50$  (petroleum ether : ethyl acetate = 5 : 1); mp: 162-164 °C;  $^1\text{H}$  NMR (400 MHz,  $\text{CDCl}_3$ )  $\delta$  8.52 (d,  $J = 8.0$  Hz, 1H), 7.67 (d,  $J = 16.0$  Hz, 1H), 7.55 (d,  $J = 8.0$  Hz, 1H), 7.49-7.45 (m, 2H), 7.43-7.38 (m, 4H), 6.84 (s, 1H), 6.47 (d,  $J = 15.6$  Hz, 1H), 4.28 (q,  $J = 7.2$  Hz, 2H), 4.14 (t,  $J = 6.4$  Hz, 2H), 3.13 (s, 3H), 3.02 (t,  $J = 6.4$  Hz, 2H), 1.35 (t,  $J = 7.2$  Hz, 3H);  $^{13}\text{C}$  NMR (100 MHz,  $\text{CDCl}_3$ )  $\delta$  166.8, 143.5, 133.9, 133.8, 130.6, 129.03, 128.97, 128.9, 128.8, 128.3, 127.5, 127.4, 121.5, 118.8, 111.9, 60.6, 44.0, 42.4, 29.7, 14.3; IR (KBr)  $\nu$  2918, 2364, 1713, 1268, 1135, 754, 561  $\text{cm}^{-1}$ ; HRMS-(ESI) ( $m/z$ ):  $[\text{M}+\text{Na}]^+$  calcd for  $\text{C}_{24}\text{H}_{23}\text{NNaO}_4\text{S}$ , 444.1240; found 444.1242.<sup>12</sup>

f)

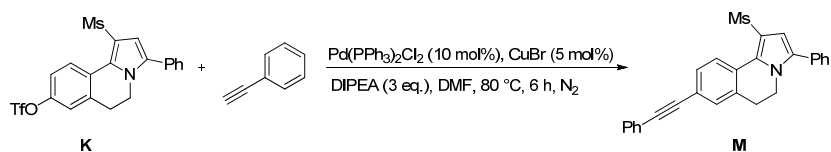

**1-(methanesulfonyl)-3-phenyl-8-(phenylethynyl)-5,6-dihydro-2,1-benzopyrrolo[2,1-a]isoquinoline (**M**)**

**K** (48.0mg, 0.1mmol), phenylacetylene (33.0  $\mu\text{L}$ , 0.3mmol), bis(triphenylphosphine)palladium(II) dichloride ( $\text{Pd}(\text{PPh}_3)_2\text{Cl}_2$ , 7.0 mg, 0.01 mmol), copper(I) bromide ( $\text{CuBr}$ , 0.7 mg, 0.005 mmol), diisopropylethylamine ( $\text{DIPEA}$ , 52.0  $\mu\text{L}$ , 0.3 mmol), and  $\text{DMF}$  (1.0 mL) were added to a pressure tube. The reaction mixture was heated to 80 °C under  $\text{N}_2$  condition for 6 h until **K** had been completely consumed as determined by TLC. The reaction mixture was cooled down to room temperature and then diluted with ethyl acetate (50 mL). The organic phase was washed with brine ( $4 \times 10$  mL) and dried with  $\text{Na}_2\text{SO}_4$ . The solvent was removed under reduced pressure to get the



crude product, which was purified by flash column chromatography on silica gel, eluted by petroleum ether/DCM to afford the product **M** as a white solid (38.0 mg, 90% yield).  $R_f = 0.50$  (petroleum ether : ethyl acetate = 5 : 1); mp: 209-211 °C;  $^1\text{H}$  NMR (400 MHz,  $\text{CDCl}_3$ )  $\delta$  8.50 (d,  $J = 8.0$  Hz, 1H), 7.55-7.53 (m, 3H), 7.48-7.35 (m, 9H), 6.83 (s, 1H), 4.12 (t,  $J = 6.4$  Hz, 2H), 3.12 (s, 3H), 2.99 (t,  $J = 6.4$  Hz, 2H);  $^{13}\text{C}$  NMR (100 MHz,  $\text{CDCl}_3$ )  $\delta$  133.7, 133.3, 131.6, 131.0, 130.8, 130.6, 129.1, 129.0, 128.7, 128.5, 128.4, 128.2, 127.1, 126.9, 123.0, 122.8, 121.2, 111.7, 90.9, 89.0, 43.9, 42.3, 29.5; IR (KBr)  $\nu$  2361, 1485, 1300, 1135, 985, 767, 701, 550  $\text{cm}^{-1}$ ; HRMS-(ESI) ( $m/z$ ):  $[\text{M}+\text{Na}]^+$  calcd for  $\text{C}_{27}\text{H}_{21}\text{NNaO}_2\text{S}$ , 446.1185; found 446.1183.<sup>12</sup>

g)

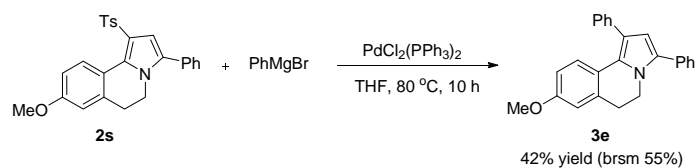

### 8-methoxy-1,3-diphenyl-5,6-dihydropyrrolo[2,1-a]isoquinoline (**3e**)

Under argon atmosphere, **2s** (43.0 mg 0.1mmol),  $\text{PdCl}_2(\text{PPh}_3)_2$  (7.02mg, 10 mol%), dehydrated THF 1.0 mL were charged in a flask and cooled to 0 °C. Phenyl magnesium bromide (1M in THF, 0.4 mL, 4.0 equiv.) was added dropwise and stirred for 10 hours at 80 °C, water 2 mL were added and then filtered. The organic layer of the filtrate was dried over magnesium sulfate. Concentration and flash chromatography on a silica column (PE : EA = 100 : 1) afforded compound **3e** as yellow oil (14.7 mg, 42% yield).  $R_f = 0.50$  (petroleum ether : ethyl acetate = 100 : 1);  $^1\text{H}$  NMR (400 MHz,  $\text{CDCl}_3$ )  $\delta$  8.18-8.16 (m, 1H), 7.46-7.40 (m, 4H), 7.36-7.30 (m, 1H), 7.24-7.18 (m, 4H), 7.09-7.04 (m, 1H), 6.76-6.74 (m, 2H), 6.41 (s, 1H), 4.16 (t,  $J = 6.4$  Hz, 2H), 3.78 (s, 3H), 2.98 (t,  $J = 6.4$  Hz, 2H).  $^{13}\text{C}$  NMR (100 MHz,  $\text{CDCl}_3$ )  $\delta$  158.3, 140.0, 134.2, 133.4, 132.6, 132.0,

128.8, 128.6, 128.5, 127.1, 126.3, 125.7, 124.5, 122.2, 116.4, 113.4, 112.2, 103.7, 55.2, 42.3, 30.4; IR (KBr)  $\nu$  2830, 2375, 2333, 1772, 1608, 1580, 1485, 1433, 1433, 1314, 1240, 1037, 813, 764, 694, 512  $\text{cm}^{-1}$ ; HRMS-(ESI) ( $m/z$ ):  $[\text{M}+\text{Na}]^+$  calcd for  $\text{C}_{25}\text{H}_{21}\text{NNaO}$ , 374.1515; found 374.1511.<sup>13</sup>

h)

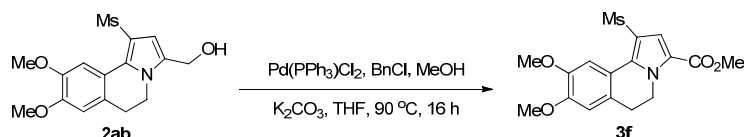

**Methyl 8,9-dimethoxy-1-(methylsulfonyl)-5,6-dihydropyrrolo[2,1-*a*] isoquinoline-3-carboxylate (**3f**)**

$\text{PdCl}_2(\text{PPh}_3)_2$  (17.5 mg, 0.025 mmol) and  $\text{K}_2\text{CO}_3$  (139.0 mg, 1.0 mmol) were placed in a Schlenk tube, which was filled with argon by using standard Schlenk techniques. THF (2.0 mL), benzyl chloride (126.6 mg, 1.0 mmol), alcohol **2ab** (0.50 mmol) and methanol (5.0 mmol) were consequently added to the reaction tube. The reaction mixture was stirred at 90 °C for 16 h. Then the resulting mixture was quenched with saturated  $\text{NH}_4\text{Cl}$  solution and suspension was extracted by ethyl acetate ( $3 \times 5$  mL). The organic layers were combined, washed with brine and dried over sodium sulfate. The pure product **3f** (141 mg, 85%) was obtained by flash column chromatography on silica gel (petroleum ether : ethyl acetate = 2 : 1);  $R_f$  = 0.60 (petroleum ether : ethyl acetate = 1 : 1);  $^1\text{H}$  NMR (400 MHz,  $\text{CDCl}_3$ )  $\delta$  8.29 (s, 1H), 7.47 (s, 1H), 6.78 (s, 1H), 4.64 (t,  $J$  = 6.8 Hz, 2H), 3.92 (appeared as doublet as O- $\text{CH}_3$  protons overlapped,  $J$  = 3.6 Hz, 6H), 3.85 (s, 3H), 3.04 (s, 3H), 2.99 (t,  $J$  = 6.8 Hz, 2H);  $^{13}\text{C}$  NMR (100 MHz,  $\text{CDCl}_3$ )  $\delta$  160.9, 149.8, 148.4, 134.6, 127.2, 120.6, 120.2, 119.8, 118.5, 110.8, 56.2, 55.9, 51.6, 43.8, 42.6, 28.5; IR

(KBr)  $\nu$  3075, 2074, 1636, 1132, 621, 477  $\text{cm}^{-1}$ ; HRMS (ESI)  $m/z$ :  $[\text{M} + \text{Na}]^+$  calcd for  $\text{C}_{17}\text{H}_{19}\text{NNaO}_6\text{S}$ , 388.0825; found 388.0822.<sup>14</sup>

## Crystal structures

**General procedure for preparation of the crystals:** The product (20 mg) was dissolved in DCM and filtered through a pad of filter paper. The filtrate was then transferred into several test-tubes by different volumes. Then to these solutions was added hexane in dropwise. These samples were allowed to be evaporated slowly at room temperature, which would eventually give colorless crystals on the surface of the tubes.

### Crystal data of product 2a

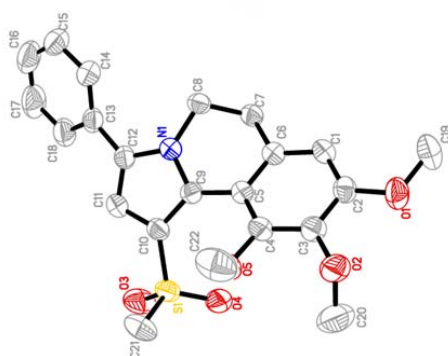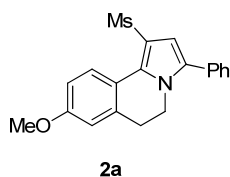

|                 |                |                |                    |
|-----------------|----------------|----------------|--------------------|
| Bond precision: | C-C = 0.0020 Å |                | Wavelength=0.71073 |
| Cell:           | a=8.2877(17)   | b=14.334(3)    | c=14.903(3)        |
|                 | alpha=90       | beta=103.09(3) | gamma=90           |
| Temperature:    | 293 K          |                |                    |
|                 | Calculated     | Reported       |                    |
| Volume          | 1724.4(6)      | 1724.4(6)      |                    |
| Space group     | P 21/c         | P2(1)/c        |                    |
| Hall group      | -P 2ybc        | ?              |                    |
| Moiety formula  | C20 H19 N O3 S | ?              |                    |

|                     |                |                                  |
|---------------------|----------------|----------------------------------|
| Sum formula         | C20 H19 N O3 S | C20 H19 N O3 S                   |
| Mr                  | 353.42         | 353.42                           |
| Dx,g cm-3           | 1.361          | 1.361                            |
| Z                   | 4              | 4                                |
| Mu (mm-1)           | 0.207          | 0.207                            |
| F000                | 744.0          | 744.0                            |
| F000'               | 744.82         |                                  |
| h,k,lmax            | 10,18,19       | 10,18,19                         |
| Nref                | 3953           | 3939                             |
| Tmin,Tmax           | 0.959, 0.959   |                                  |
| Tmin'               | 0.959          |                                  |
| Correction method = | Not given      |                                  |
| Data completeness = | 0.996          | Theta(max) = 27.480              |
| R(reflections) =    | 0.0387( 3200)  | wR2(reflections) = 0.1131( 3939) |
| S =                 | 1.060          | Npar = 228                       |

### Crystal data of product 3i

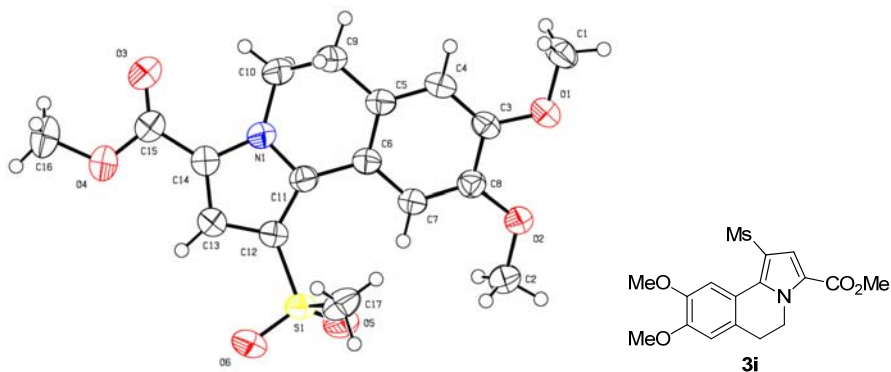

|                                 |                                                                                                                  |
|---------------------------------|------------------------------------------------------------------------------------------------------------------|
| Identification code             | d                                                                                                                |
| Empirical formula               | C <sub>17</sub> H <sub>19</sub> N O <sub>6</sub> S                                                               |
| Formula weight                  | 365.39                                                                                                           |
| Temperature                     | 293(2) K                                                                                                         |
| Wavelength                      | 0.71073 Å                                                                                                        |
| Crystal system, space group     | ?, ? P21/c                                                                                                       |
| Unit cell dimensions            | a = 7.5531(15) Å    alpha = 90 °.<br>b = 28.802(6) Å    beta = 113.57(3) °.<br>c = 8.5314(17) Å    gamma = 90 °. |
| Volume                          | 1701.2(6) Å <sup>3</sup>                                                                                         |
| Z, Calculated density           | 4, 1.427 Mg/m <sup>3</sup>                                                                                       |
| Absorption coefficient          | 0.224 mm <sup>-1</sup>                                                                                           |
| F(000)                          | 768                                                                                                              |
| Crystal size                    | ? x ? x ? mm                                                                                                     |
| Theta range for data collection | 2.70 to 27.48 °.                                                                                                 |
| Limiting indices                | -9<=h<=9, -37<=k<=37, -10<=l<=11                                                                                 |

|                                   |                                             |
|-----------------------------------|---------------------------------------------|
| Reflections collected / unique    | 13063 / 3843 [R(int) = 0.0277]              |
| Completeness to theta =           | 27.48 98.4 %                                |
| Refinement method                 | Full-matrix least-squares on F <sup>2</sup> |
| Data / restraints / parameters    | 3843 / 0 / 230                              |
| Goodness-of-fit on F <sup>2</sup> | 1.084                                       |
| Final R indices [I>2sigma(I)]     | R1 = 0.0468, wR2 = 0.1165                   |
| R indices (all data)              | R1 = 0.0573, wR2 = 0.1232                   |
| Largest diff. peak and hole       | 0.219 and -0.289 e.Å <sup>-3</sup>          |

## Reference

- (1) Nie, X.; Wang, G. Synthesis and Self-Assembling Properties of Diacetylene-Containing Glycolipids. *J. Org. Chem.* **2006**, *71*, 4734–4741.
- (2) Yang, L.; Zhang, J.; Si, L.; Han, L.; Zhang, B.; Ma, H.; Xing, J.; Zhao, L.; Zhou, J.; Zhang, H. Synthesis and biological evaluation of GPR40/FFAR1 agonists containing 3,5-dimethylisoxazole. *Eur. J. Med. Chem.* **2016**, *116*, 46–58.
- (3) Yang, S. H.; Song, C.-H.; Van, H. T. M.; Park, E. D.; Khadka, B.; Gong, E.-Y.; Lee, K.; Cho, W.-J. SAR Based Design of Nicotinamides as a Novel Class of Androgen Receptor Antagonists for Prostate Cancer. *J. Med. Chem.* **2013**, *56*, 3414–3418.
- (4) Kendall, J.; McDonald, R.; Ferguson, M. J.; Tykwinski, R. R. Synthesis and Solid-State Structure of Perfluorophenyl End-Capped Polyynes. *Org. Lett.* **2008**, *10*, 2163–2166.
- (5) Zhu, L.; Yu, Y.; Mao, Z.; Huang, X. Gold-Catalyzed Intermolecular Nitrene Transfer from 2H-Azirines to Ynamides: A Direct Approach to Polysubstituted Pyrroles. *Org. Lett.* **2015**, *17*, 30–33.
- (6) Stuart, D. R.; Laperle, M. B.; Burgess, K. M. N.; Fagnou, K. Indole Synthesis via Rhodium Catalyzed Oxidative Coupling of Acetanilides and Internal Alkynes. *J. Am. Chem. Soc.* **2008**, *130*, 16474–16475.
- (7) Sommerwerk, S.; Heller, L.; Kufs, J.; Csuk, R. Selective killing of cancer cells with triterpenoic acid amides-The substantial role of an aromatic moiety alignment. *Eur. J. Med. Chem.* **2016**, *122*, 452–464.



- (8) Ortiz, C.; Greenhouse, R. The Total Synthesis Of  $\pm$ -Isoretronecanol From Pyrrole. *Tetrahedron Lett.* **1985**, *26*, 2831–2832.
- (9) Pla, D.; Marchal, A.; Olsen, C. A.; Francesch, A.; Cuevas, C.; Albericio, F.; Alvarez, M. Synthesis and Structure-Activity Relationship Study of Potent Cytotoxic Analogues of the Marine Alkaloid Lamellarin D. *J. Med. Chem.* **2006**, *49*, 3257–3268.
- (10) Ohta, T.; Fukuda, T.; Ishibashi, F.; Iwao, M. Design and Synthesis of Lamellarin D Analogues Targeting Topoisomerase I. *J. Org. Chem.* **2009**, *74*, 8143–8153.
- (11) Chai, G.; Lu, Z.; Fu, C.; Ma, S. Studies on the Tandem Reaction of 4-Aryl-2,3-allenoates with Organozinc Reagents: A Facile Route to Polysubstituted Naphthols. *Chem. Eur. J.* **2009**, *15*, 11083–11086.
- (12) Peng, S.; Wang, L.; Wang, J. Direct Access to Highly Substituted 1-Naphthols through PalladiumCatalyzed Oxidative Annulation of Benzoylacetates and Internal Alkynes. *Chem. Eur. J.* **2013**, *19*, 13322–13327.
- (13) Jia, S.; Chen, Z.; Zhang, N.; Tan, Y.; Liu, Y.; Deng, J.; Yan, H. Organocatalytic Enantioselective Construction of Axially Chiral Sulfone-Containing Styrenes. *J. Am. Chem. Soc.* **2018**, *140*, 7056–7060
- (14) Xia, J.; Shao, A.; Tang, S.; Gao, X.; Gao, M.; Lei, A. Palladium-catalysed oxidative cross-esterification between two alcohols. *Org. Biomol. Chem.* **2015**, *13*, 6154–6157.

# Copy of $^1\text{H}$ NMR and $^{13}\text{C}$ NMR spectra

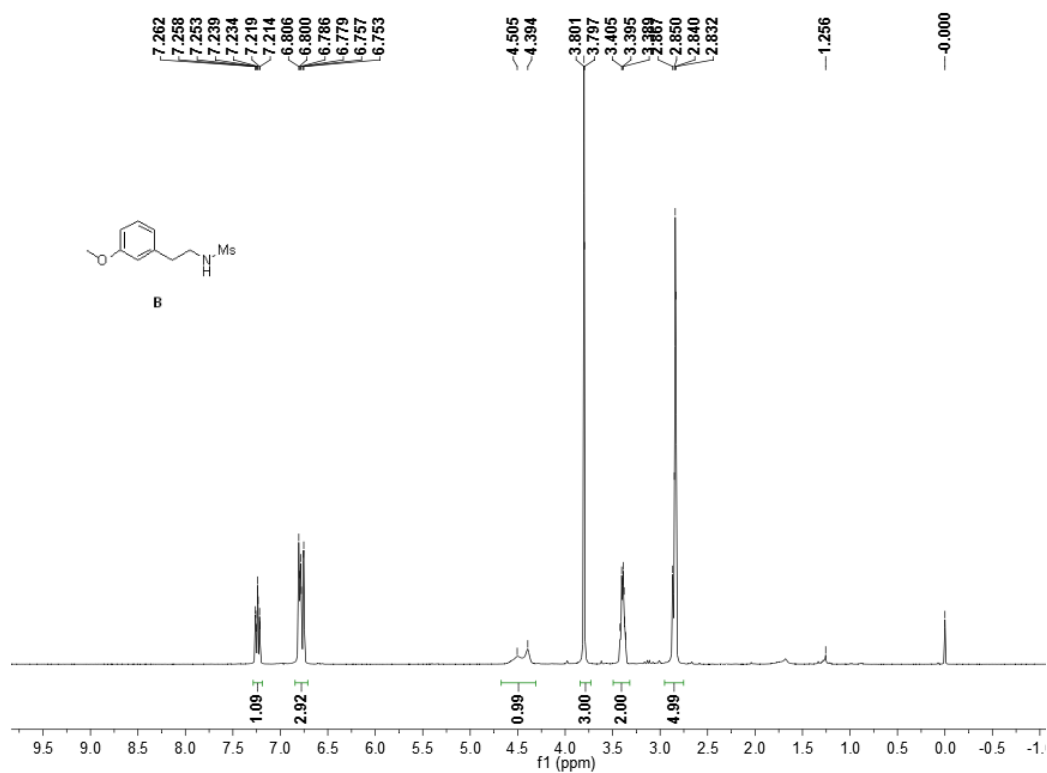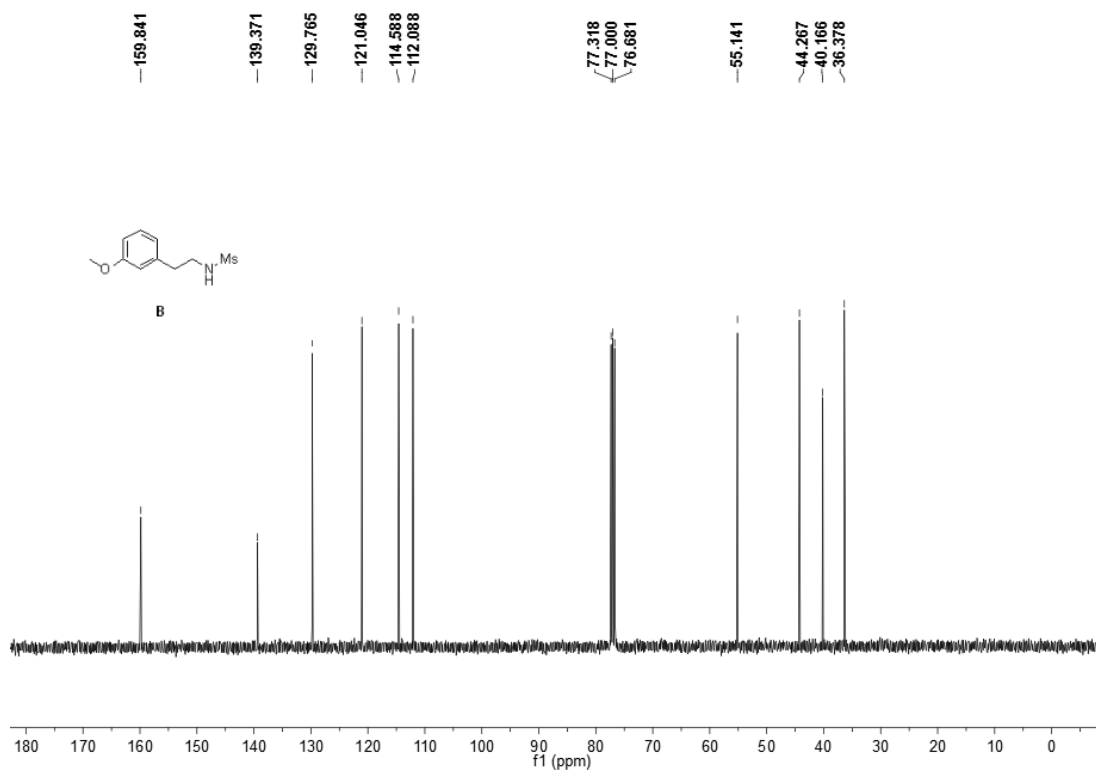

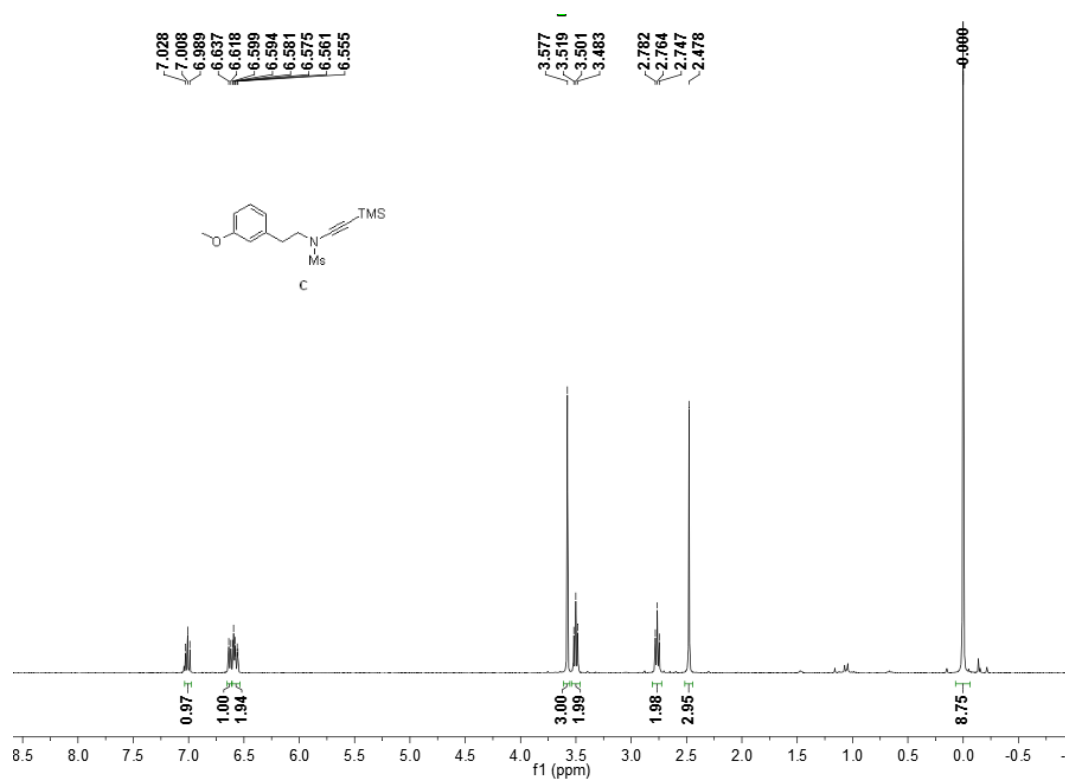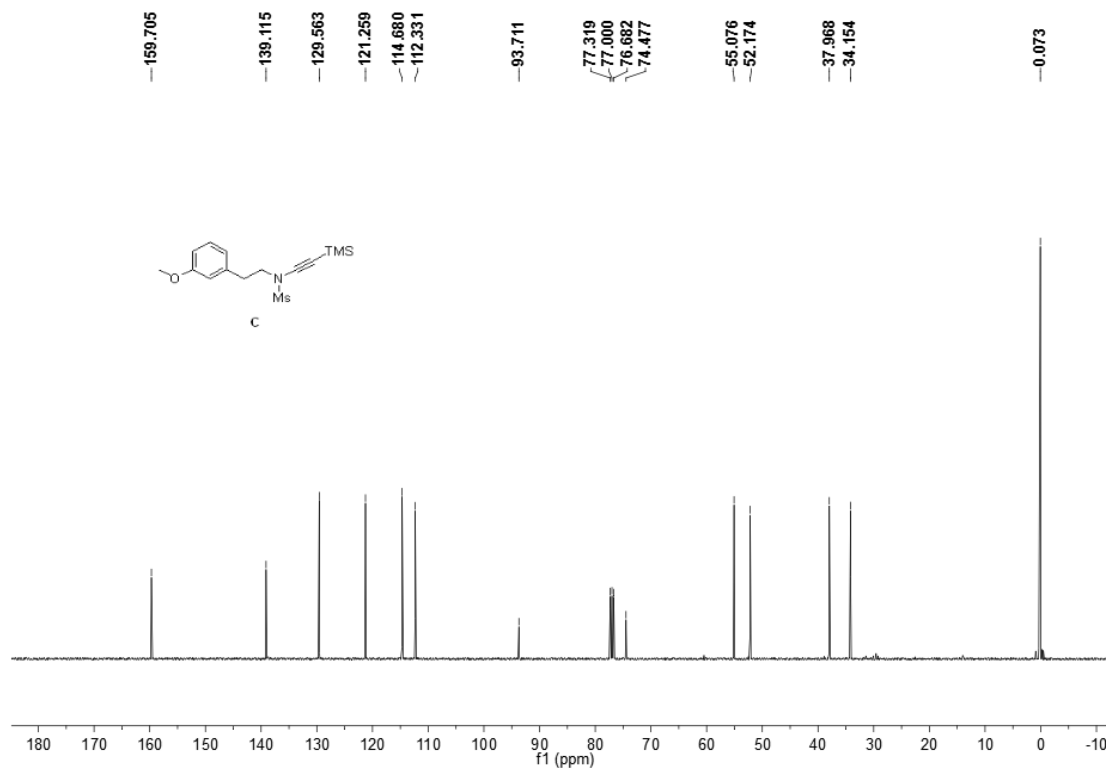

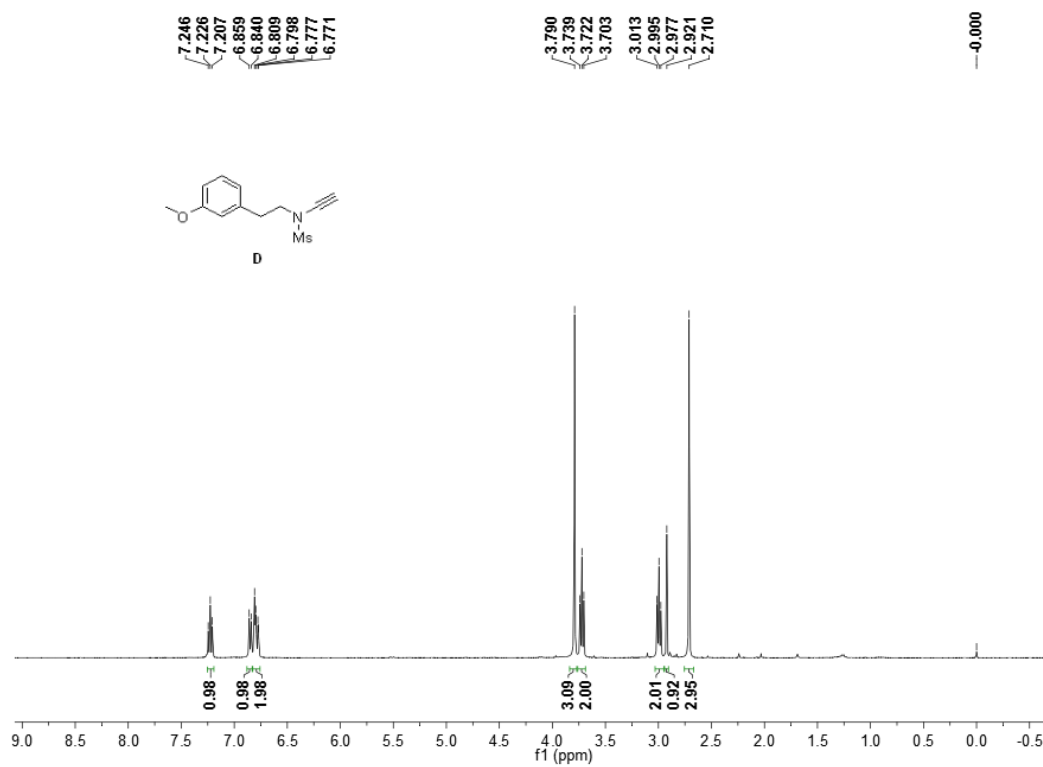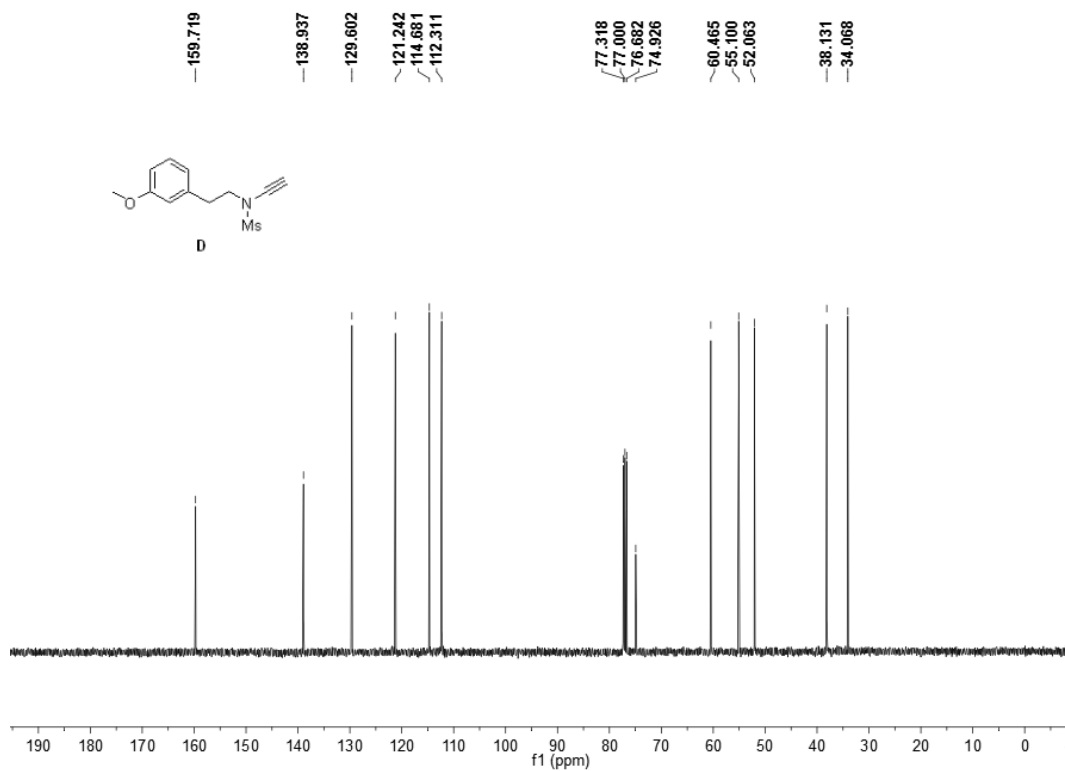

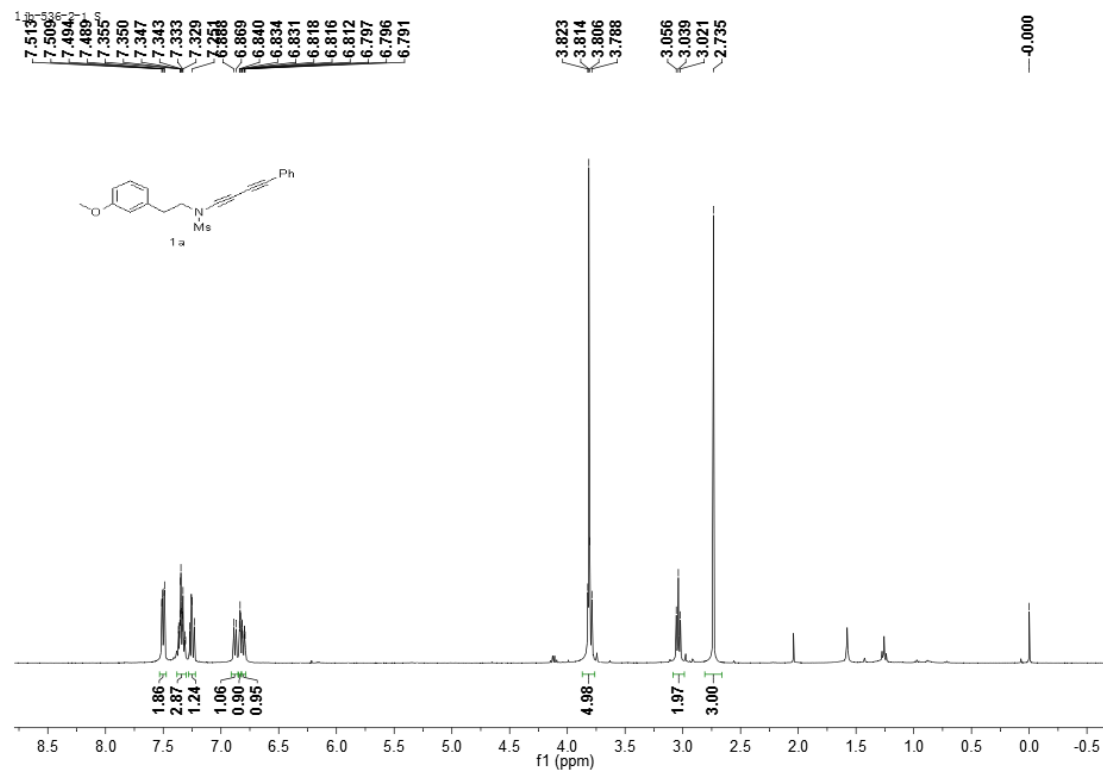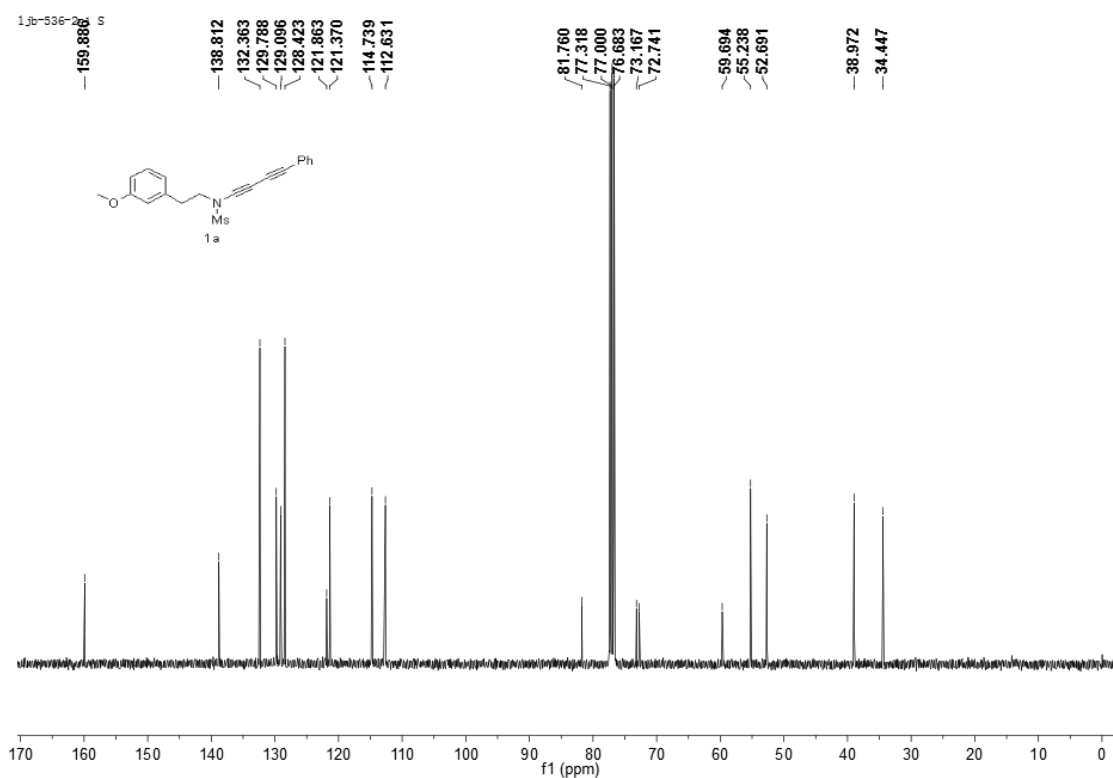

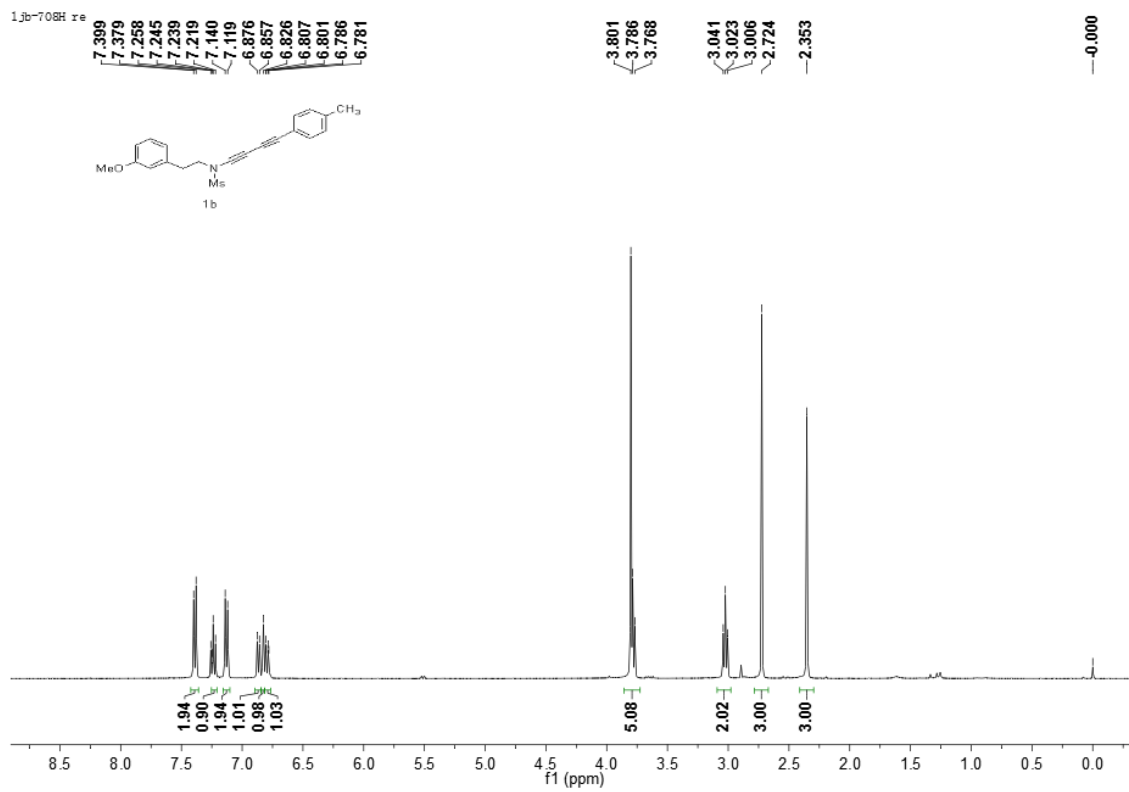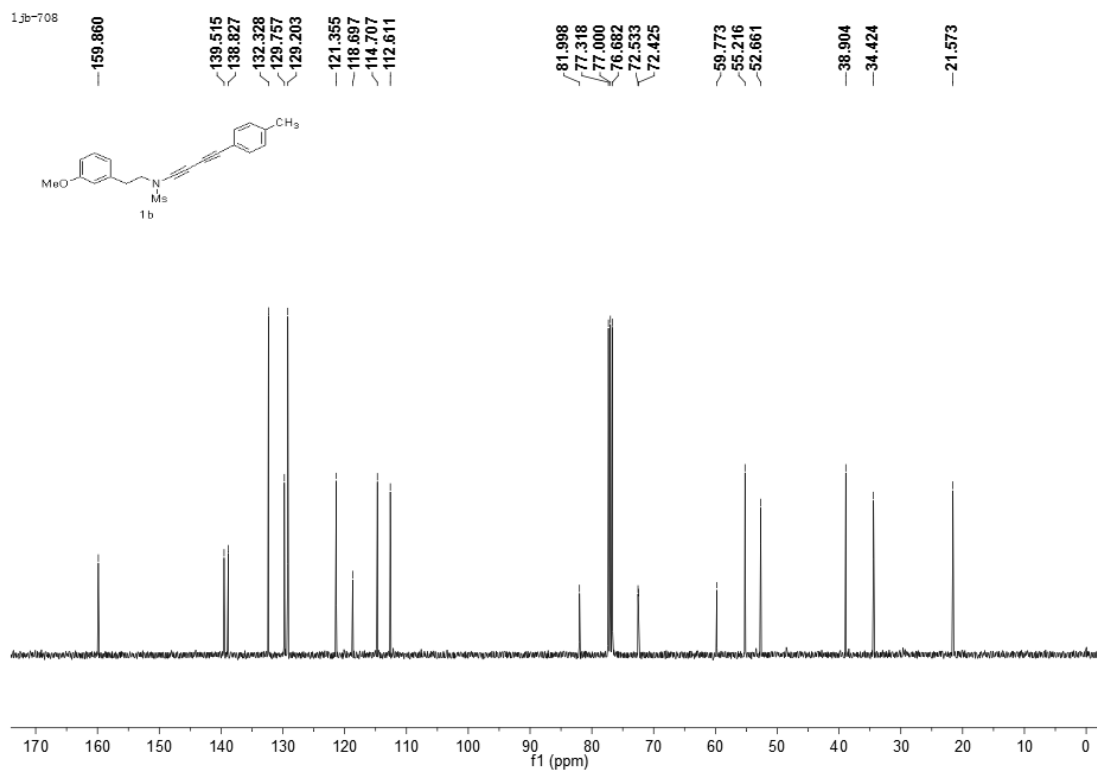

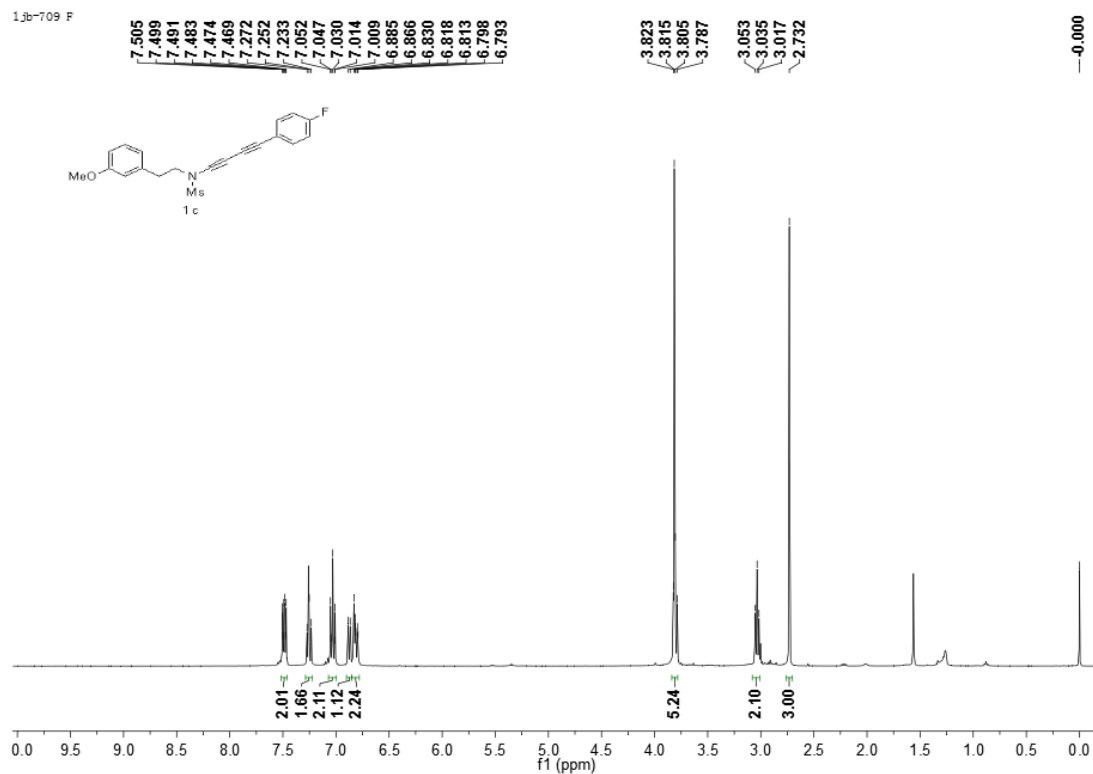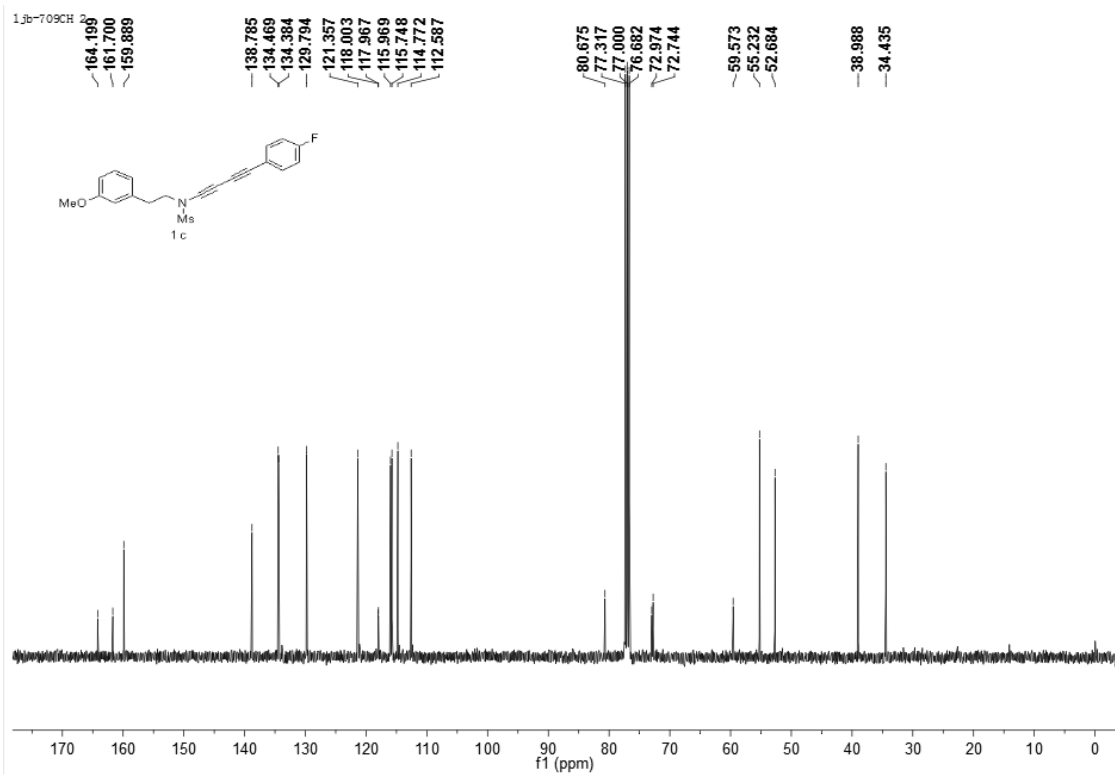

13b-709 F

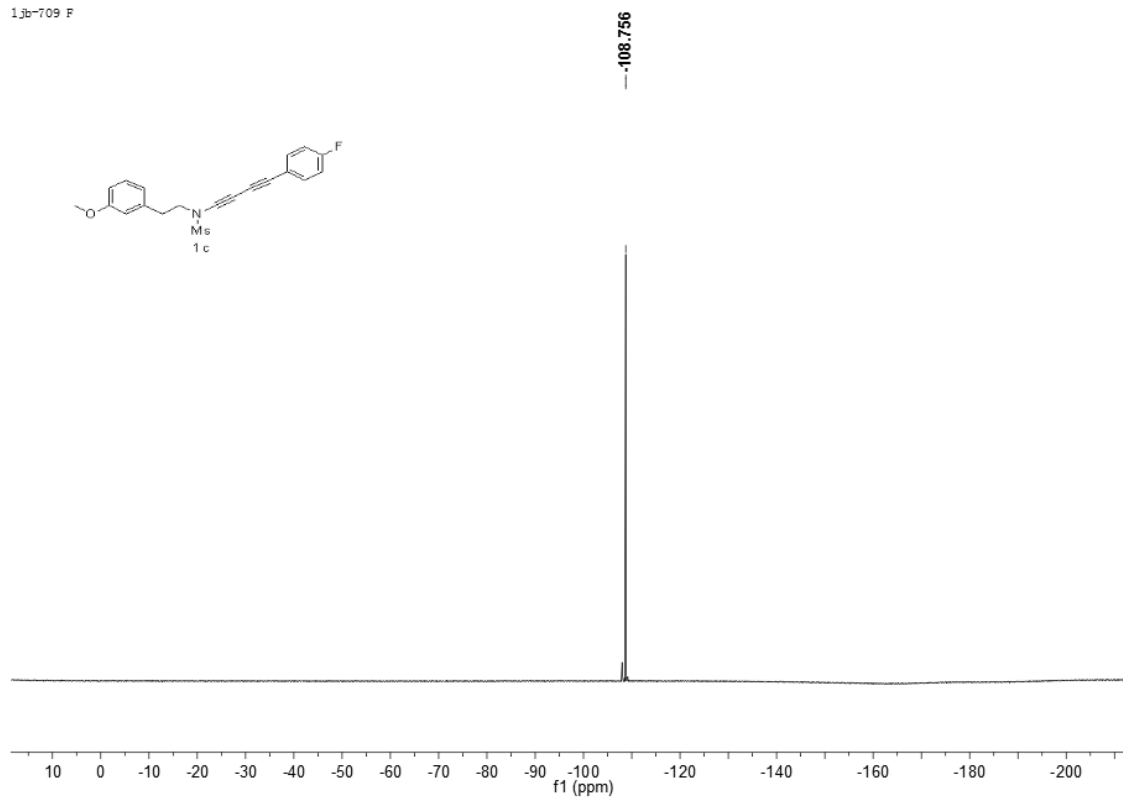



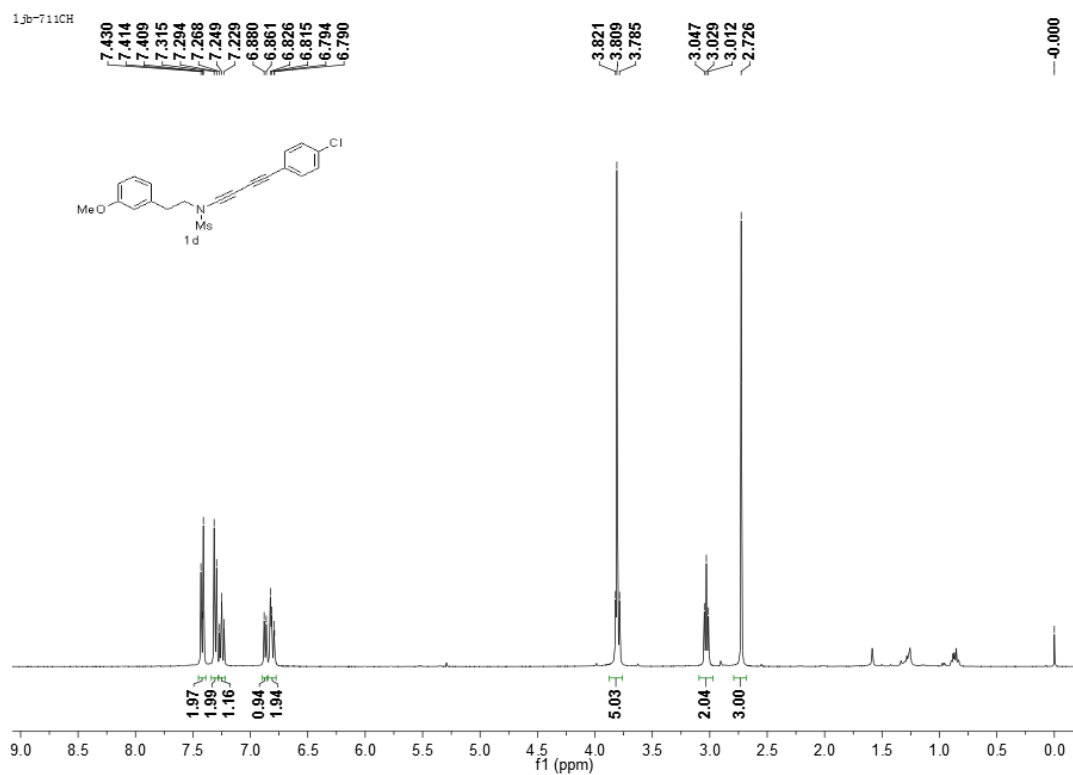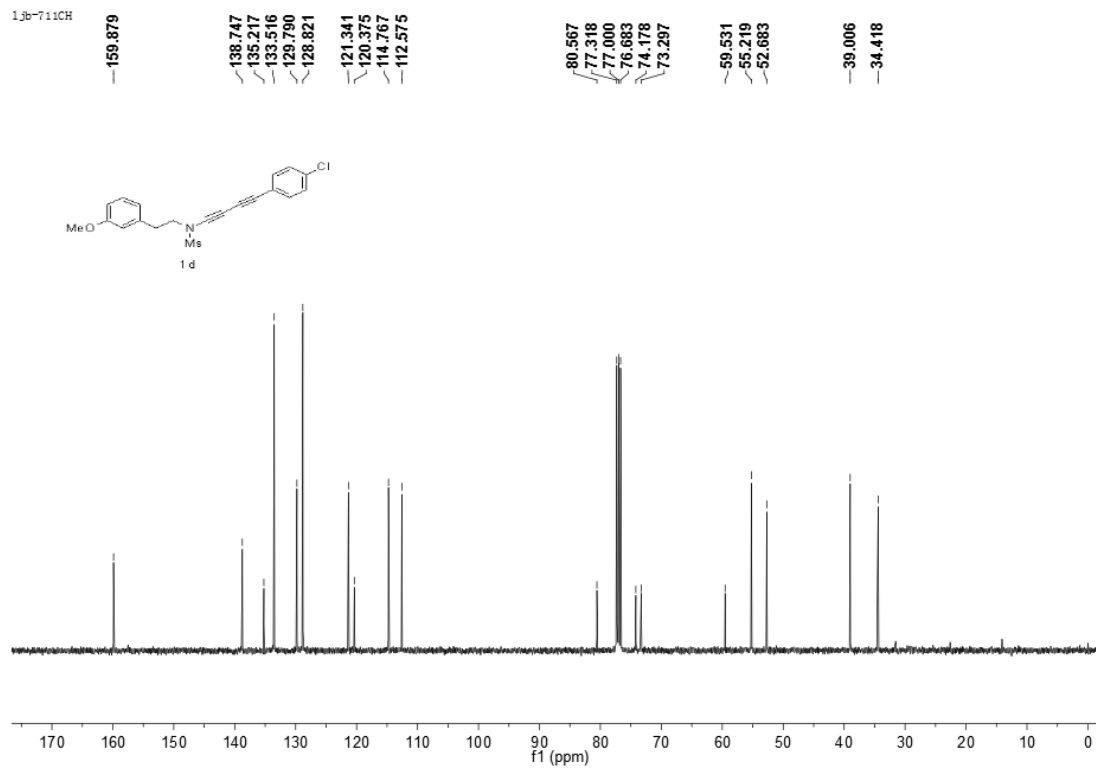

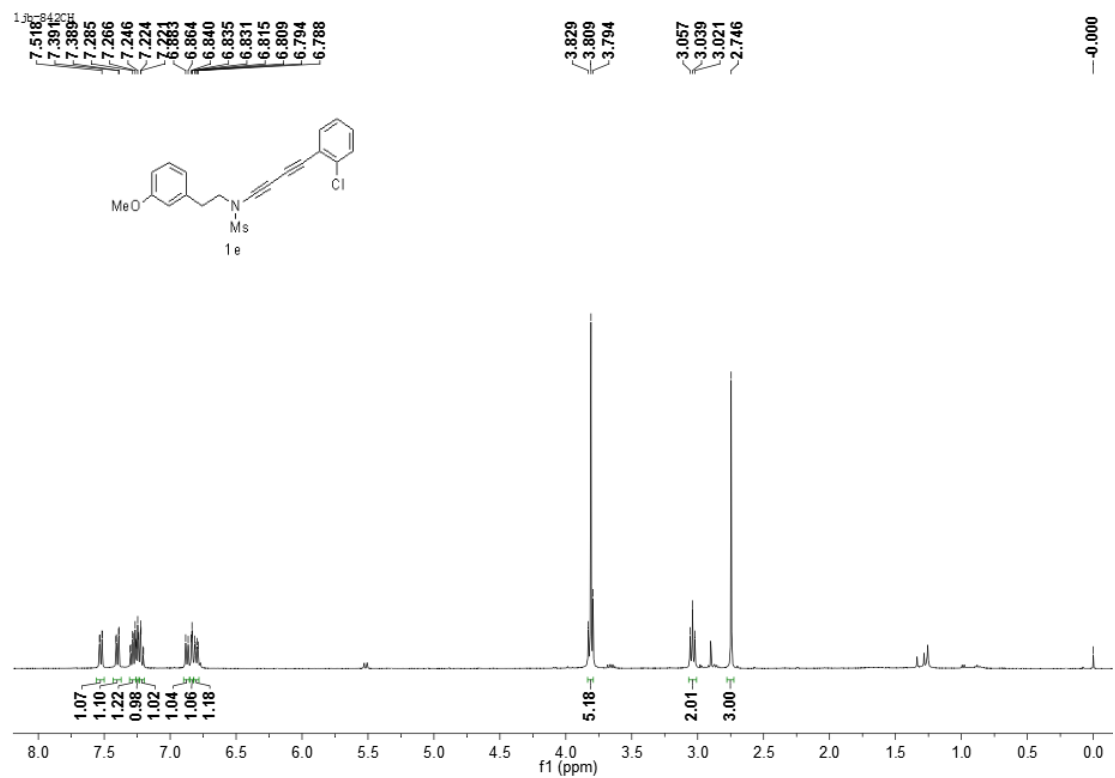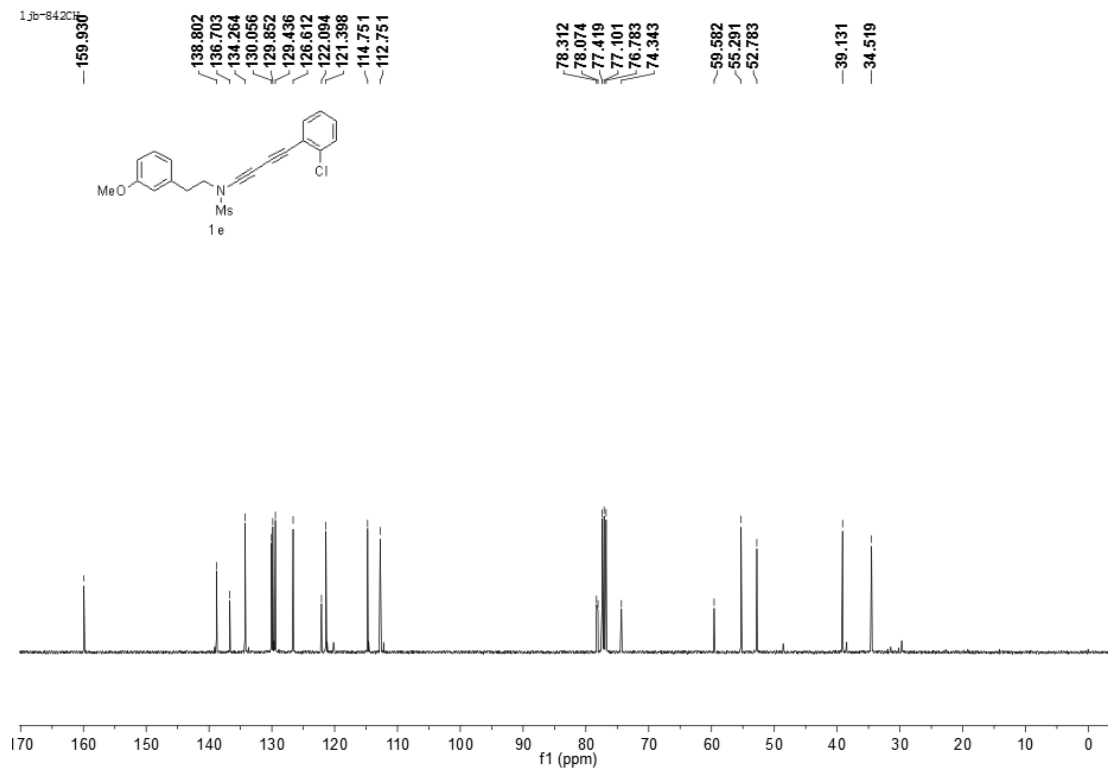



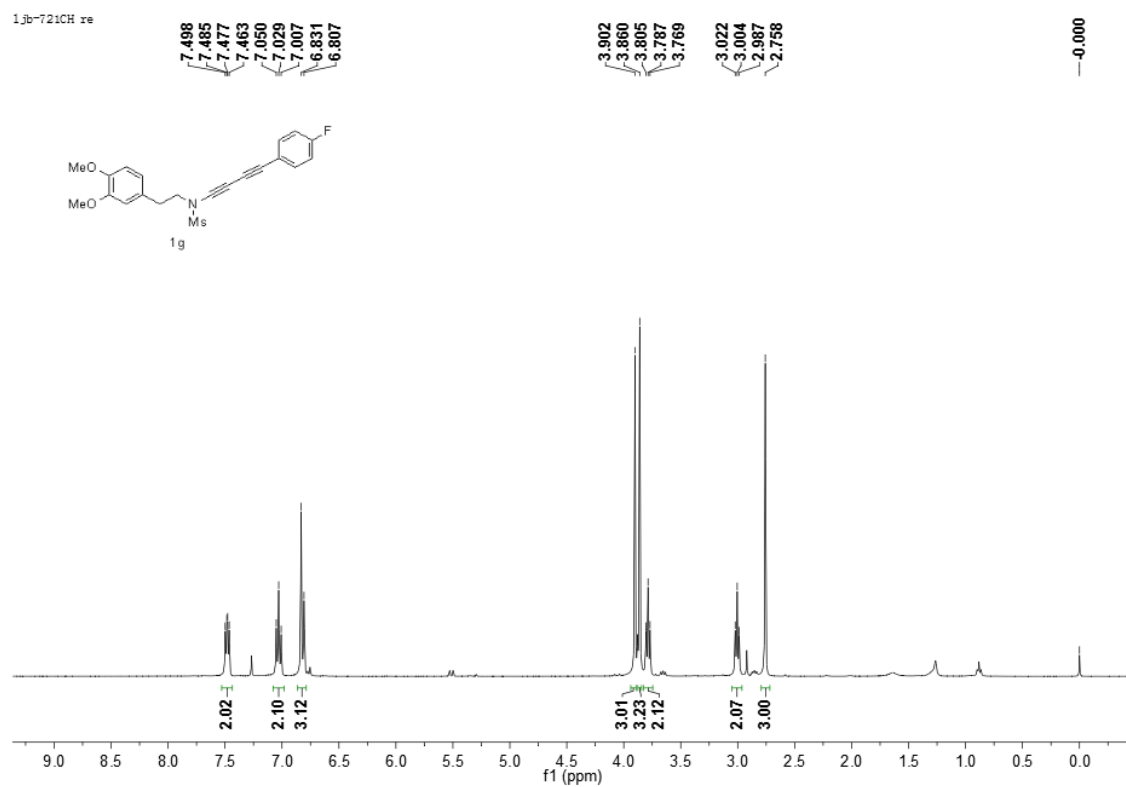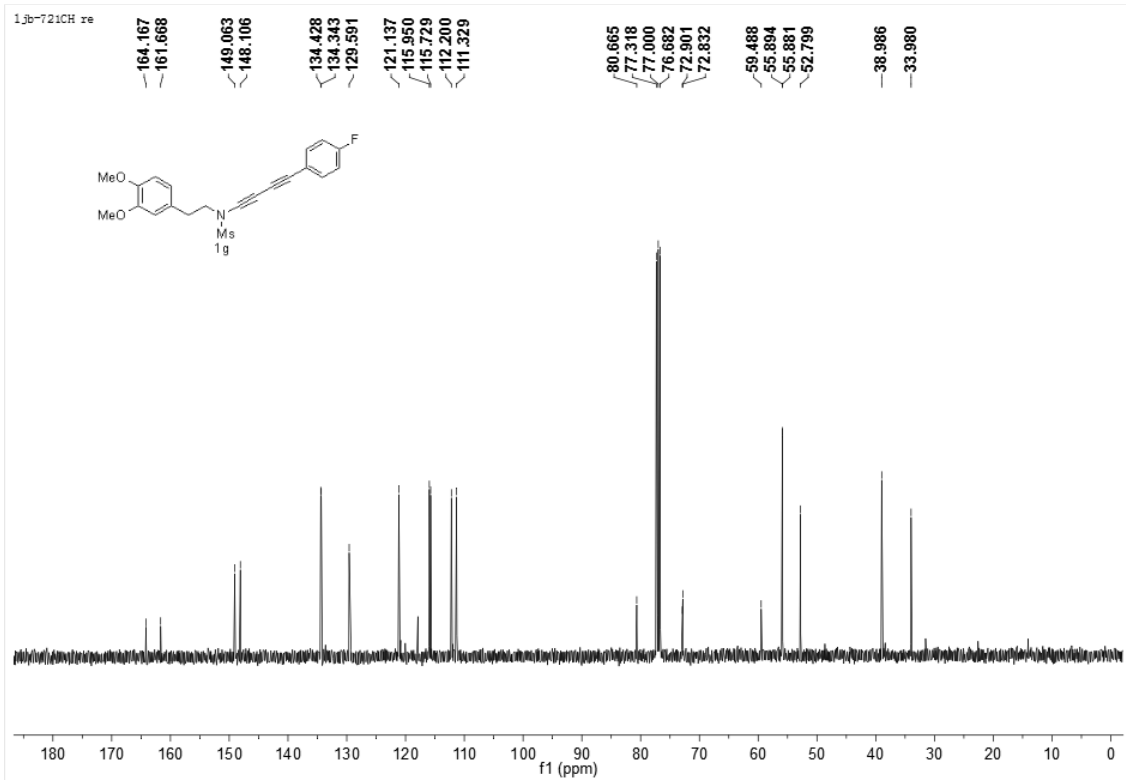

13b-721 F

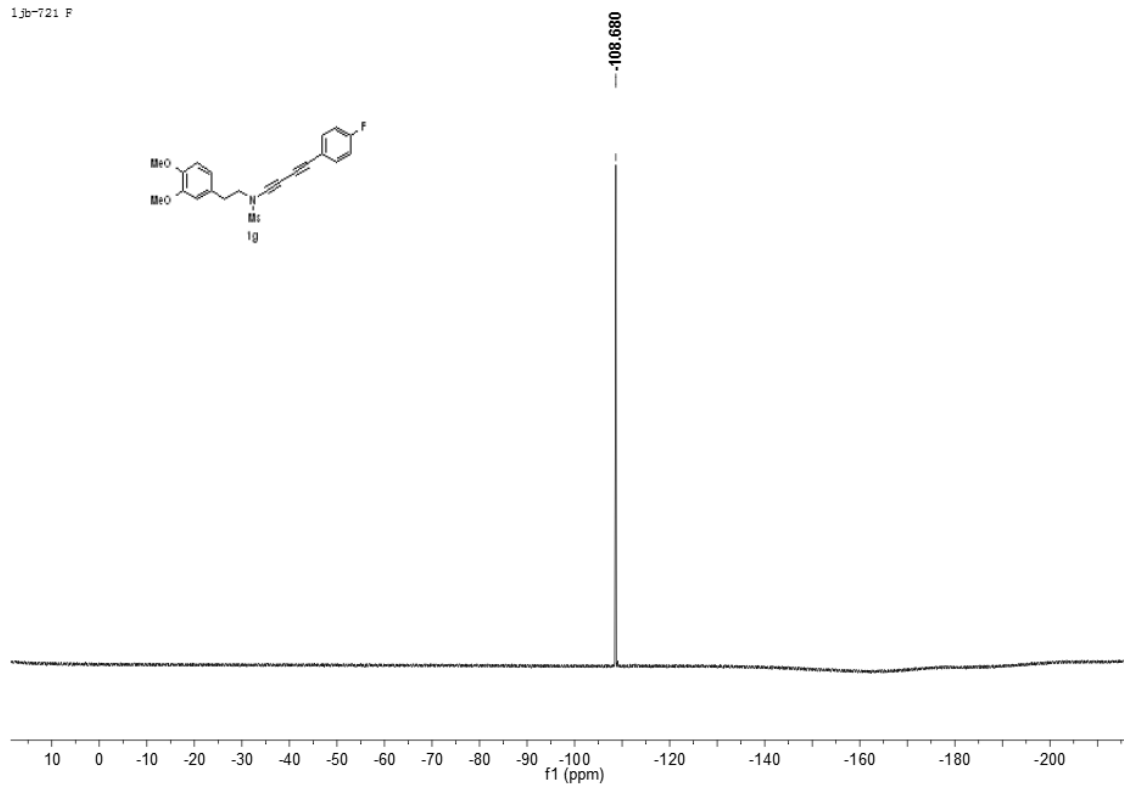

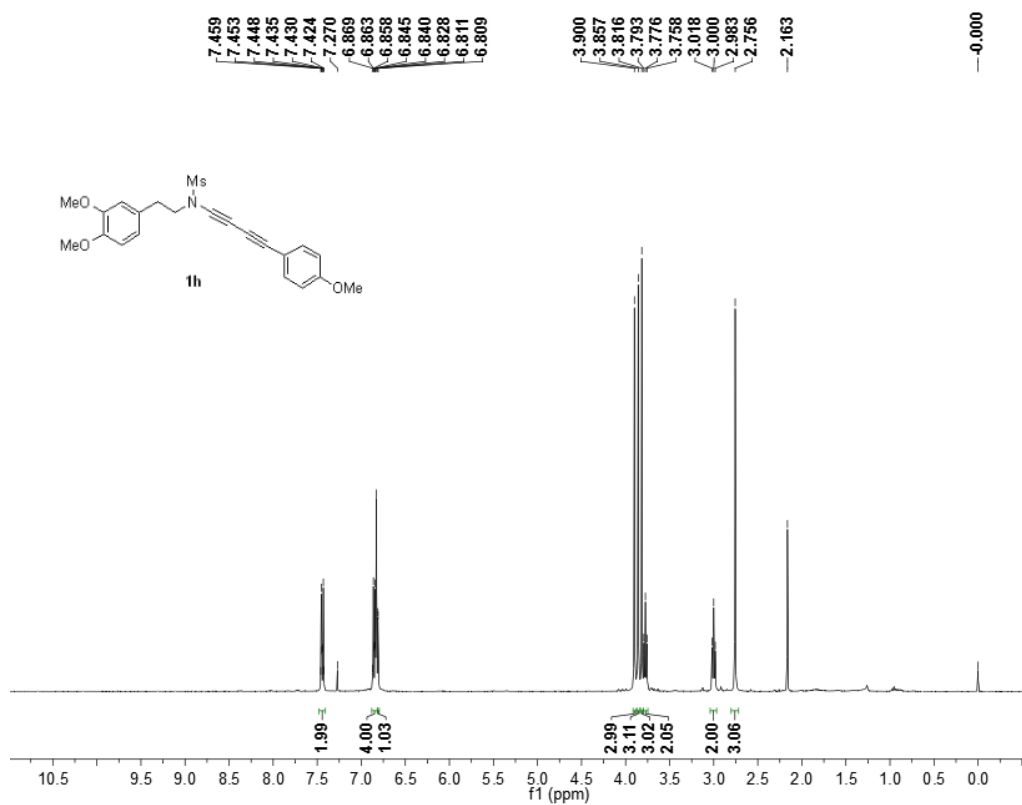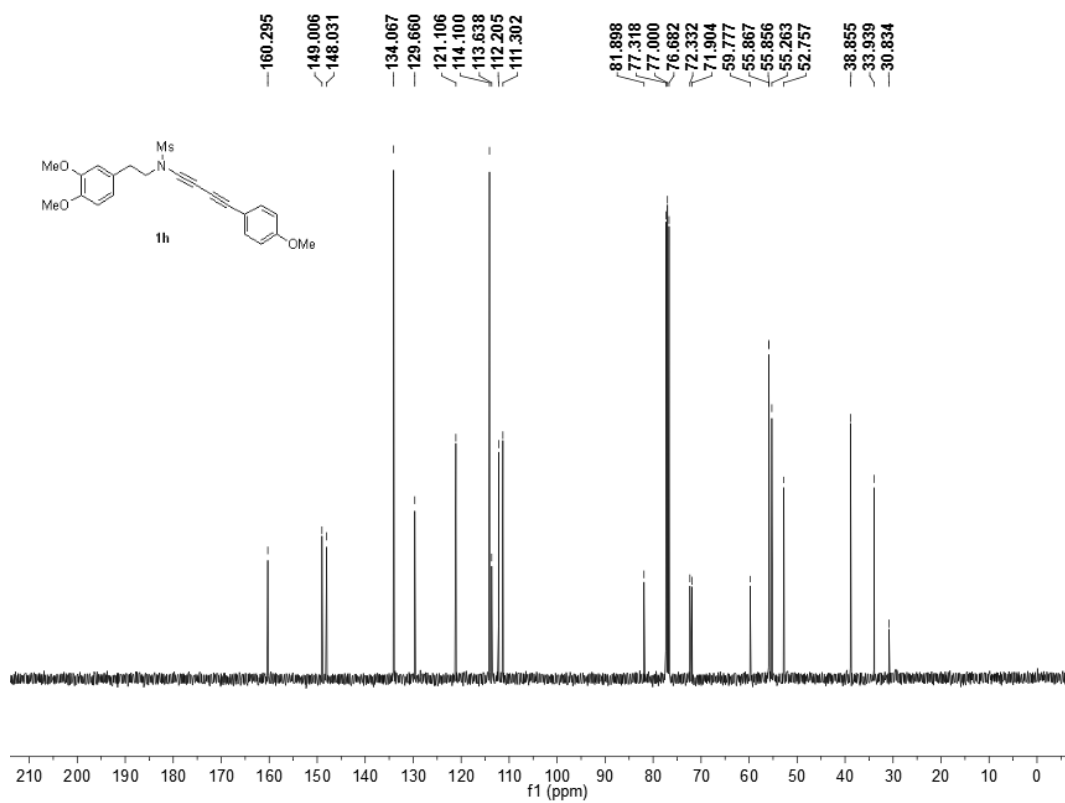

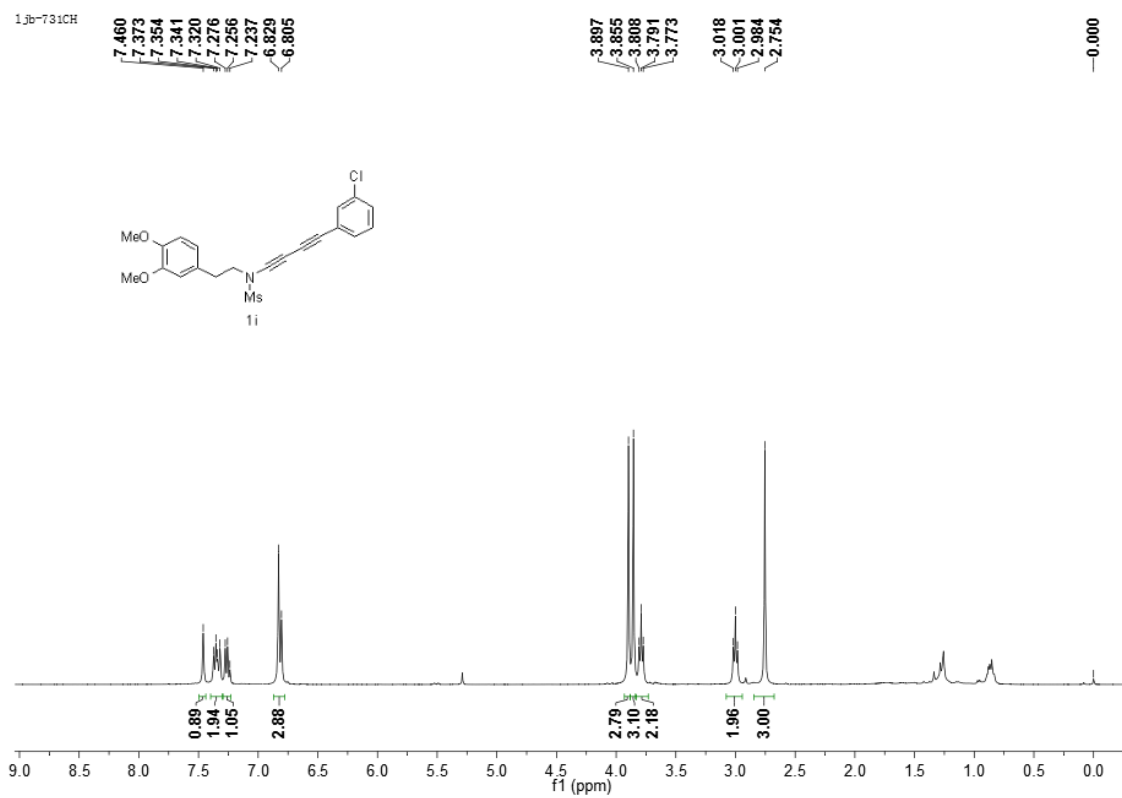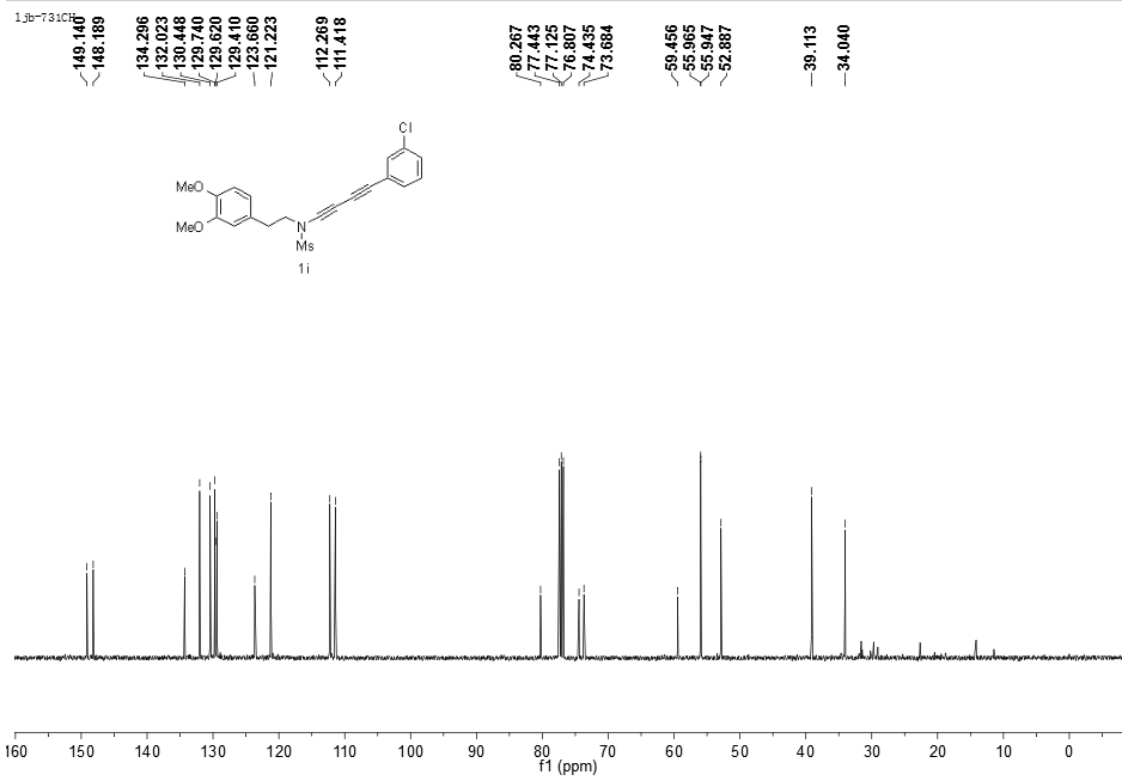

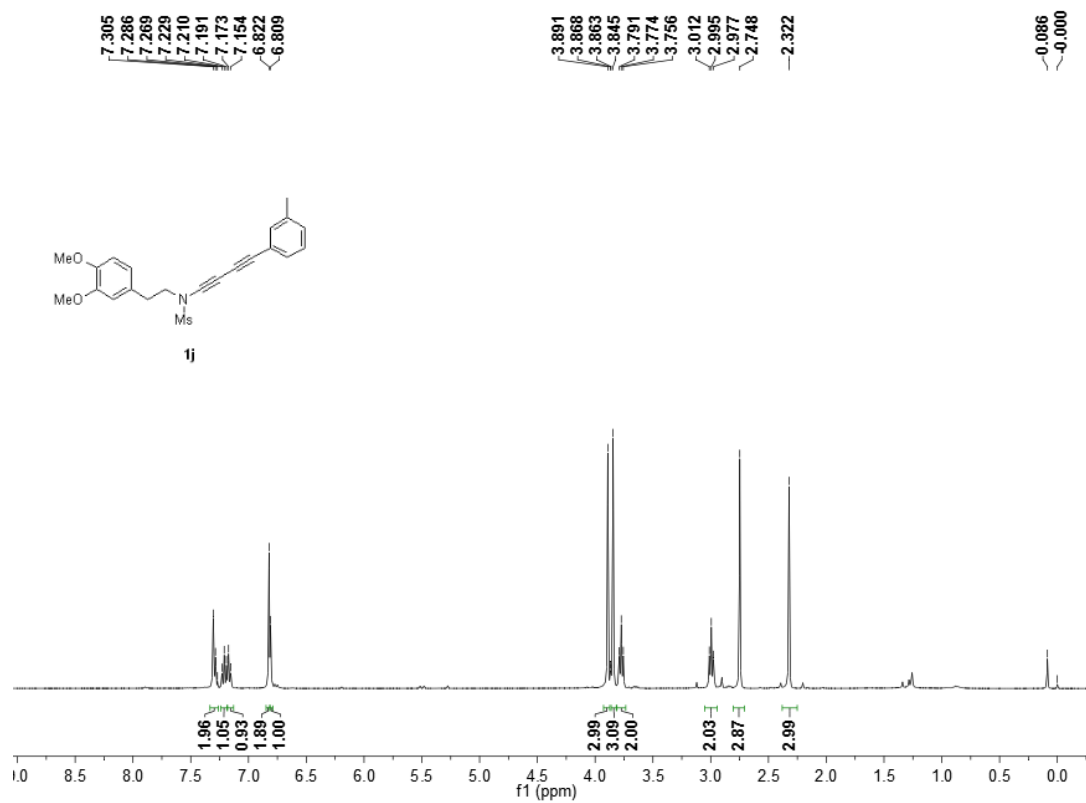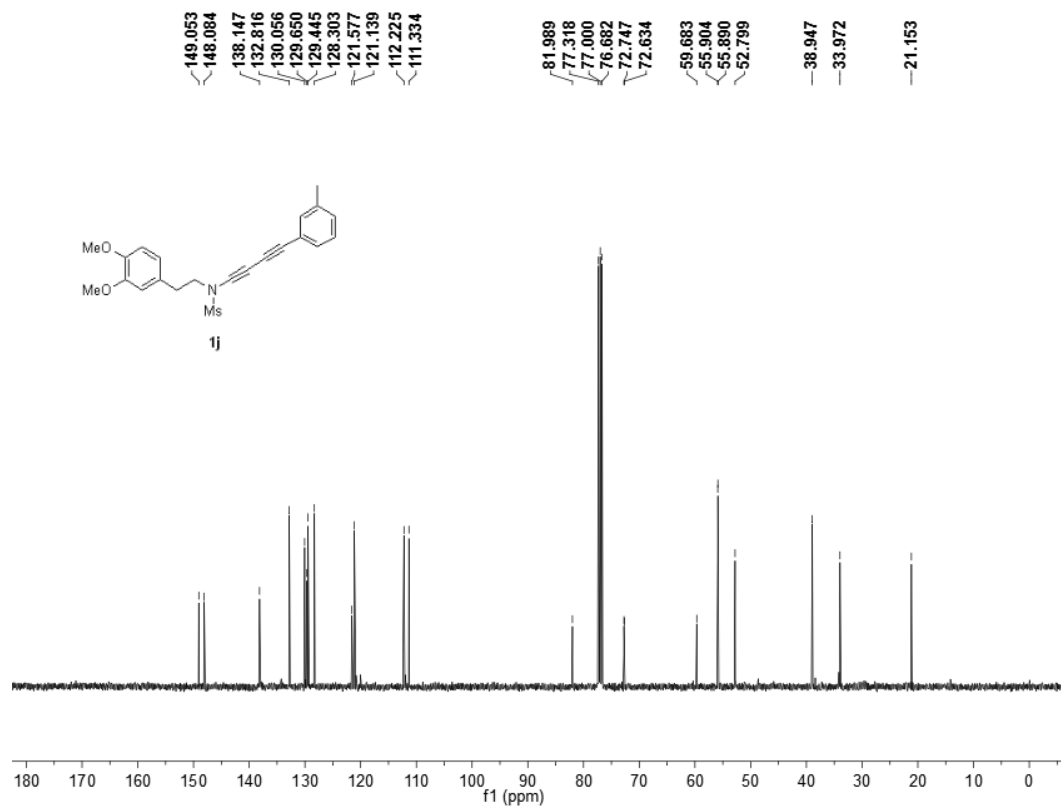



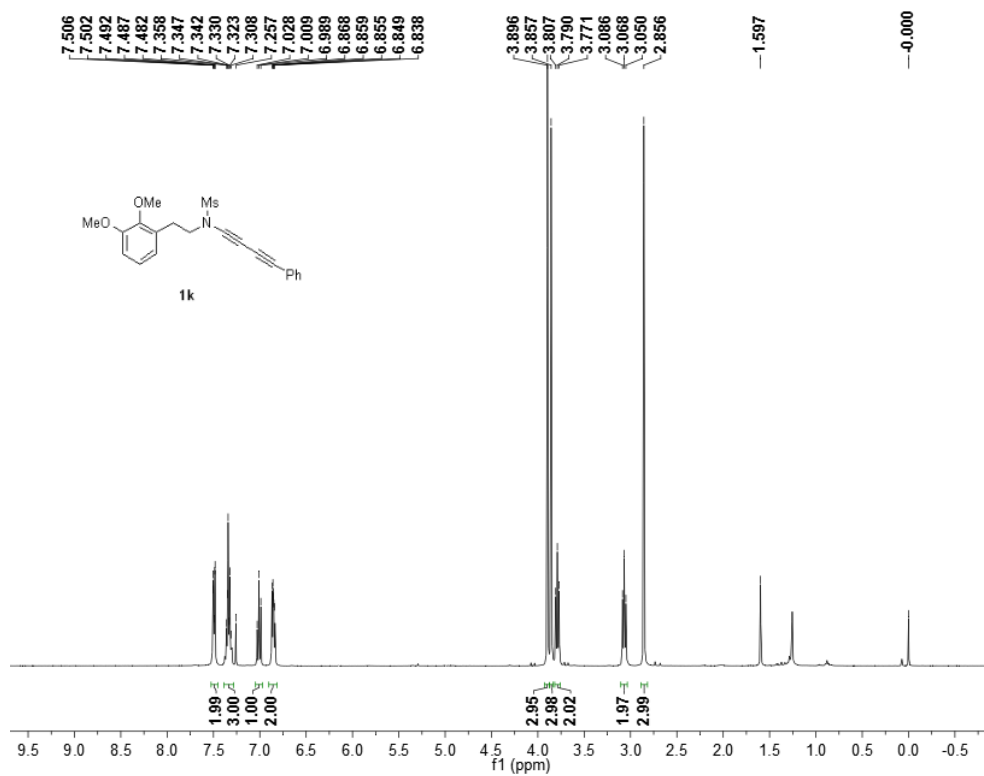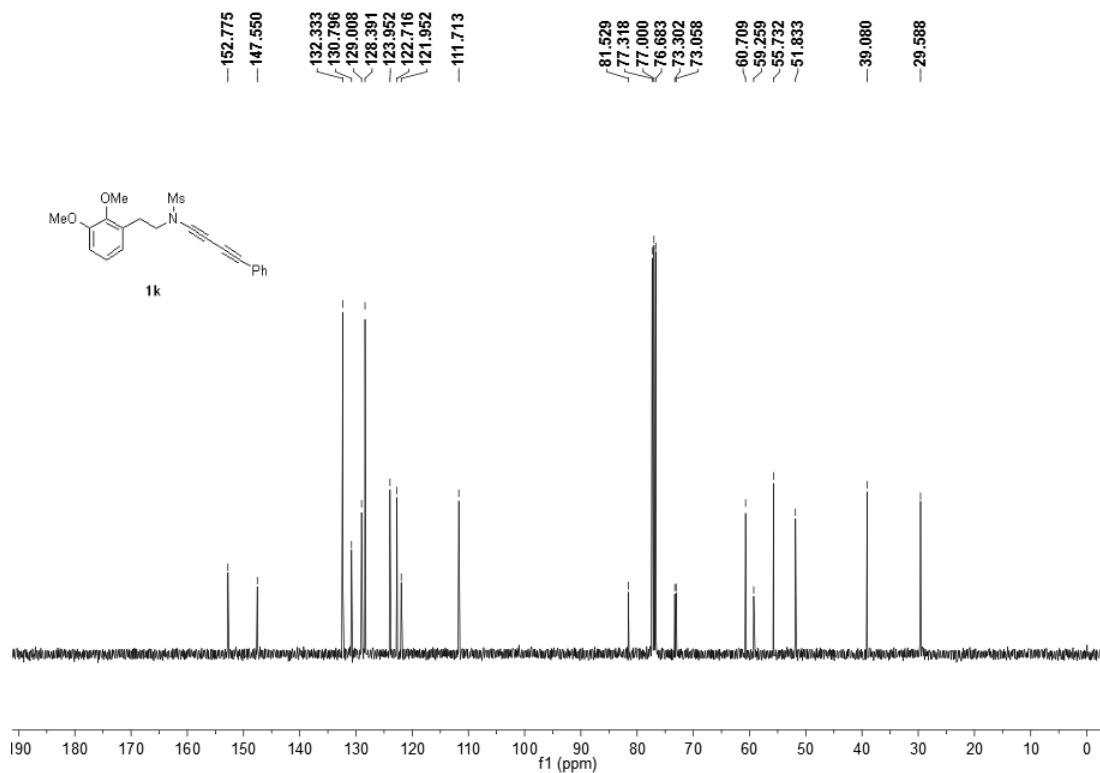

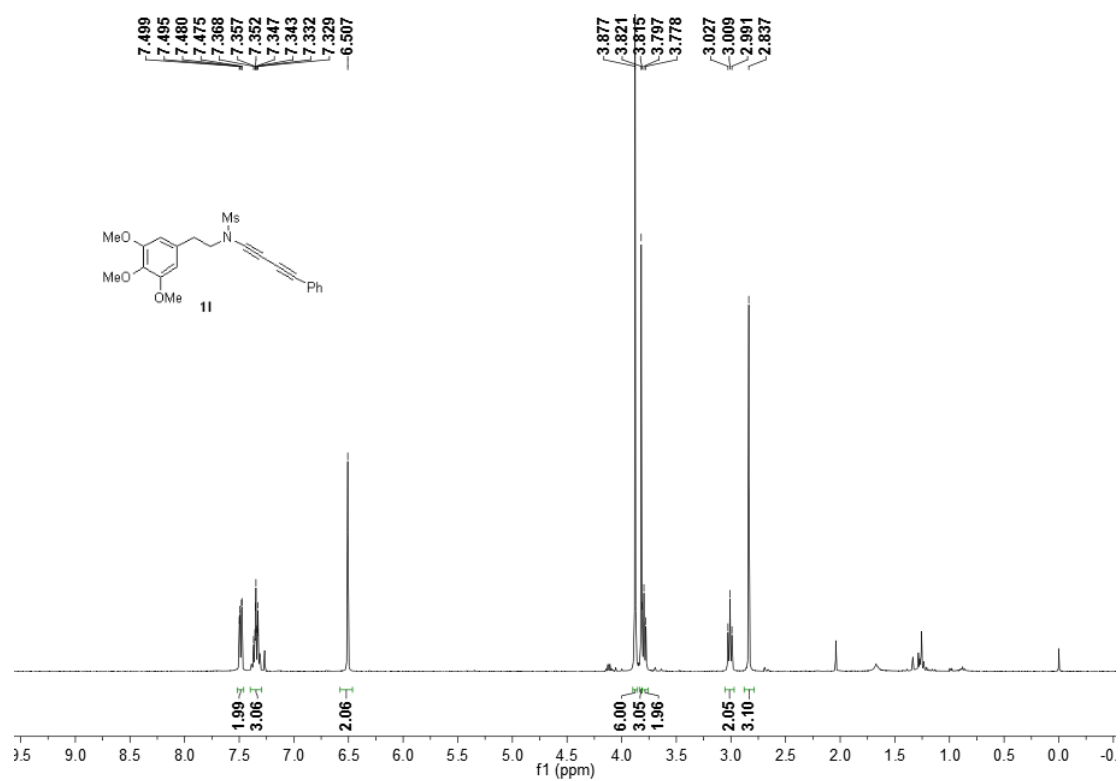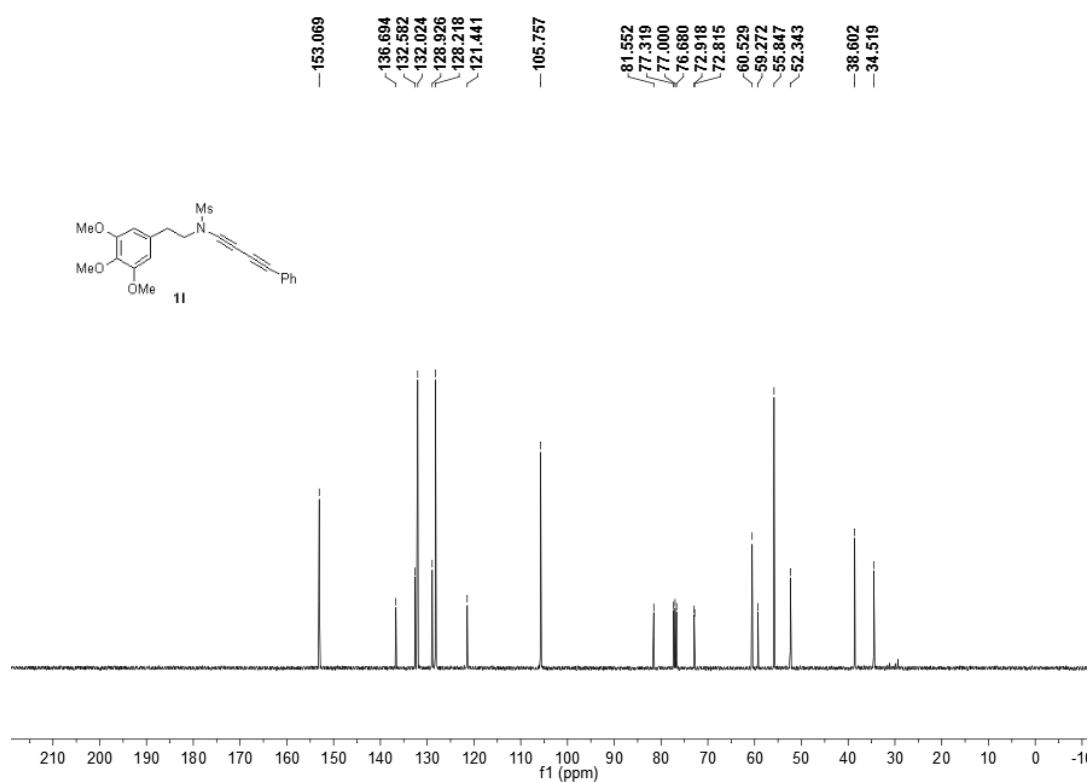

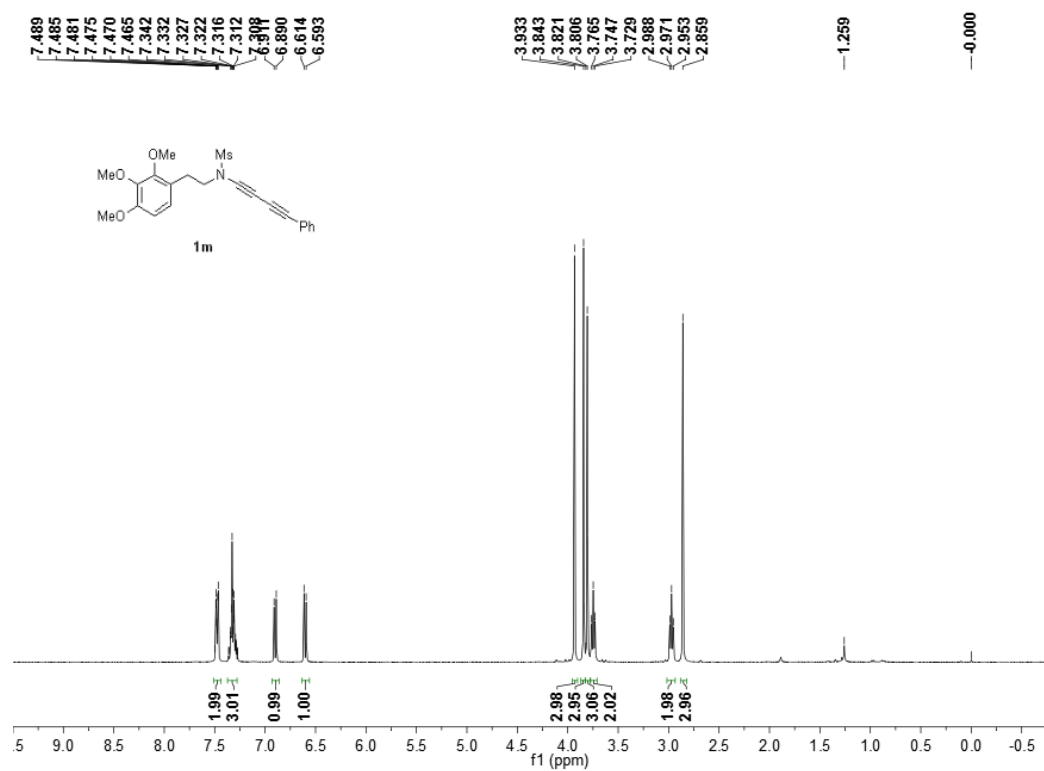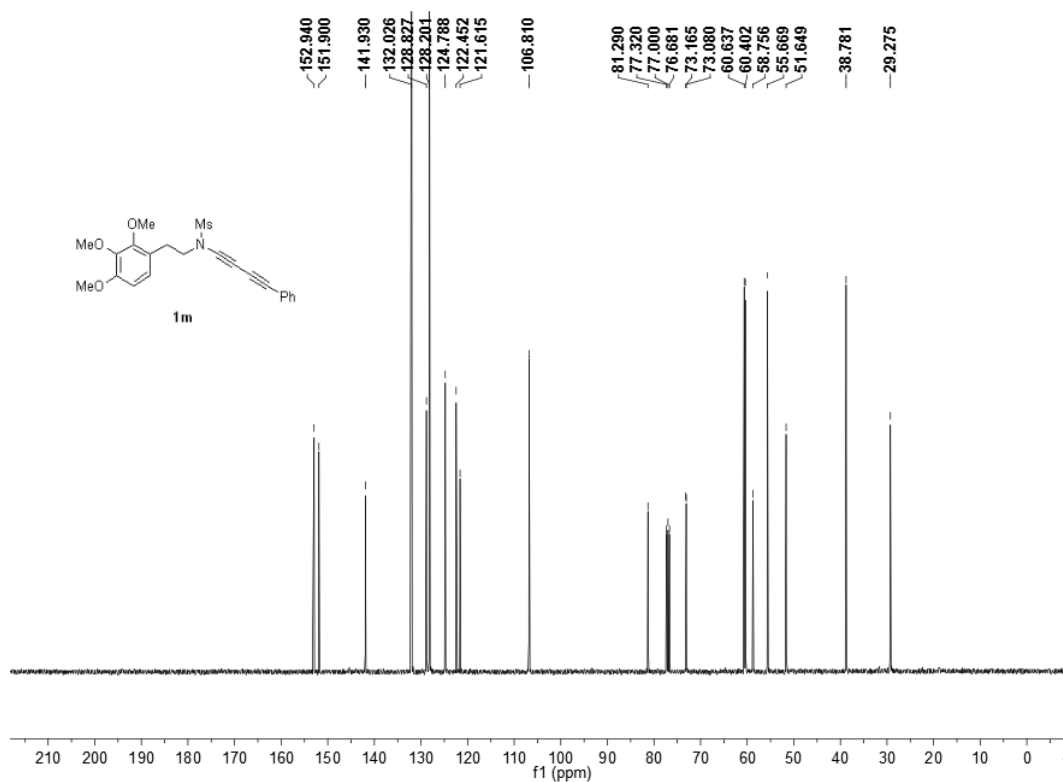

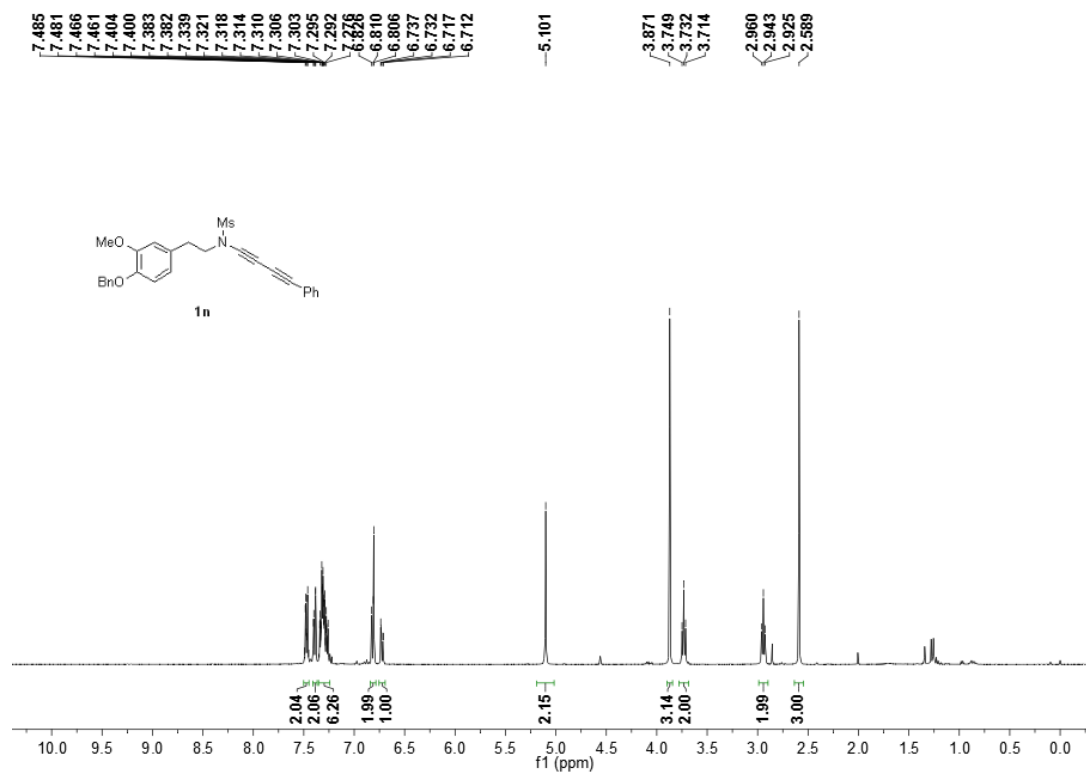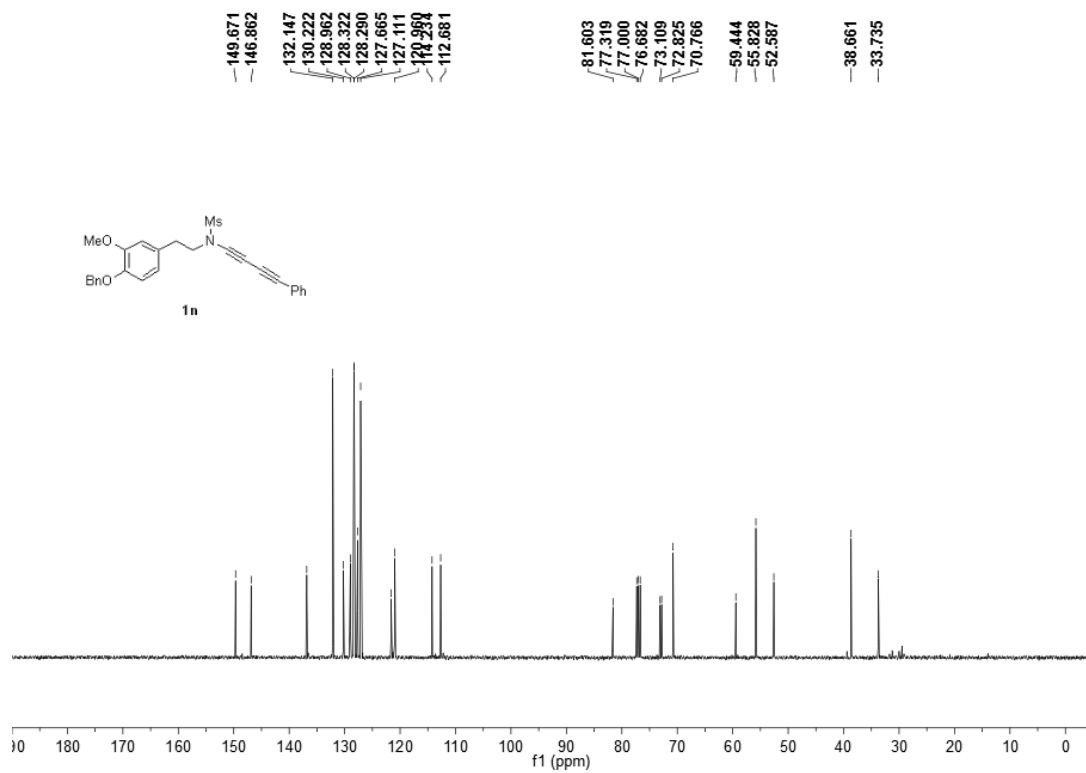

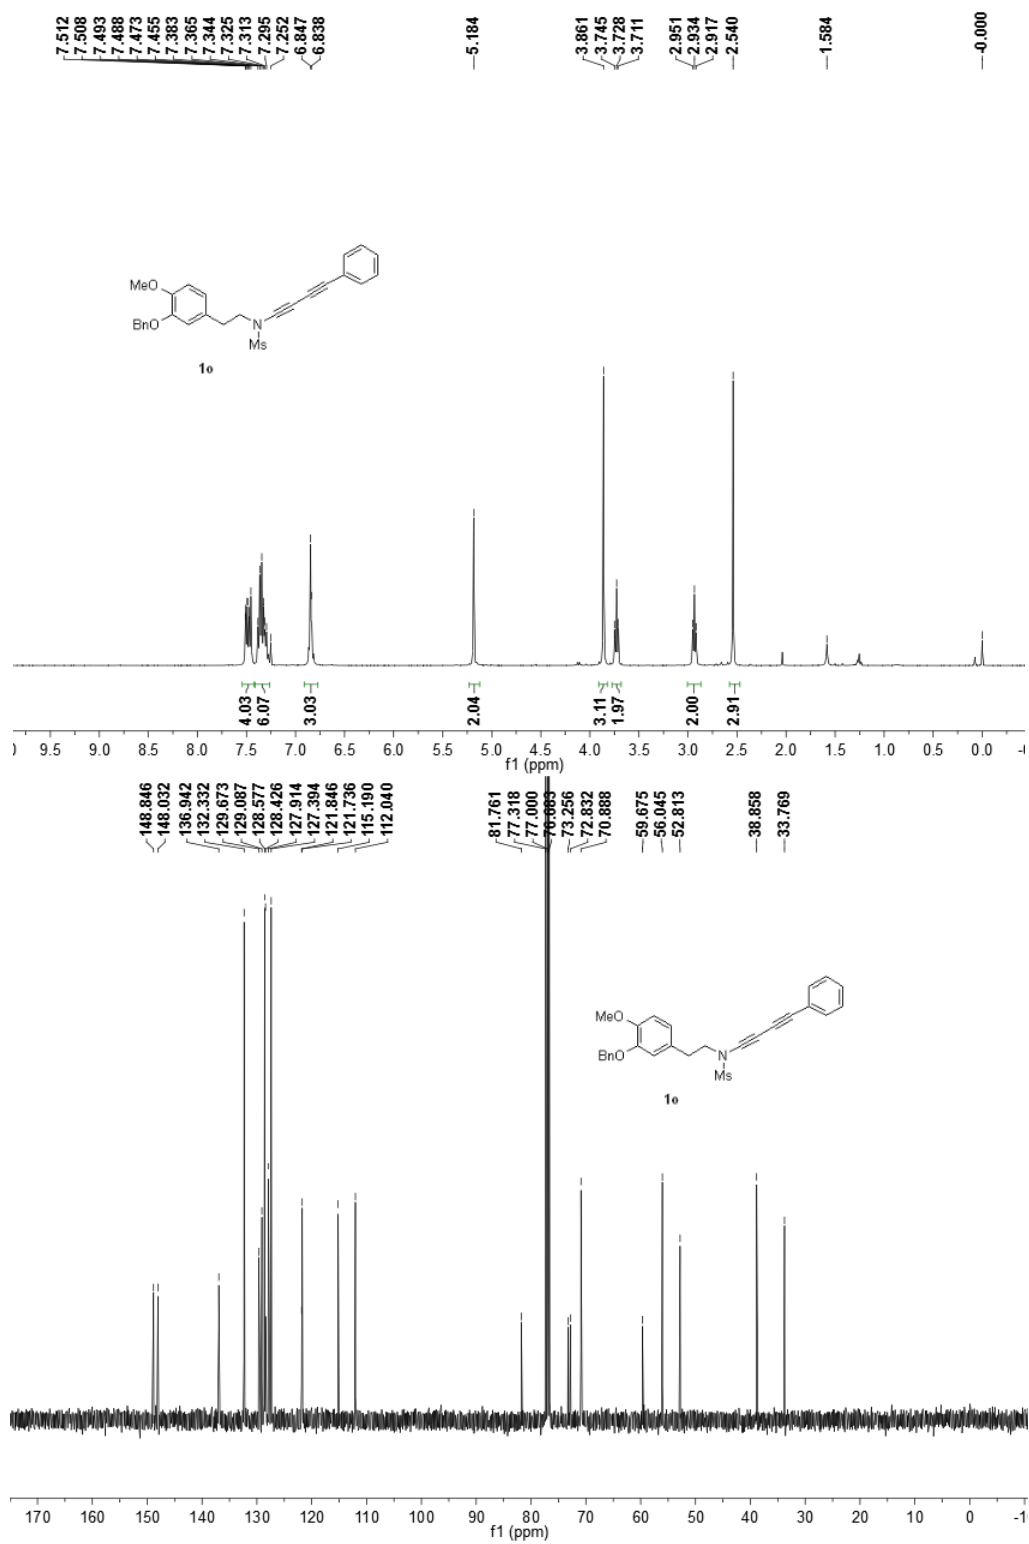

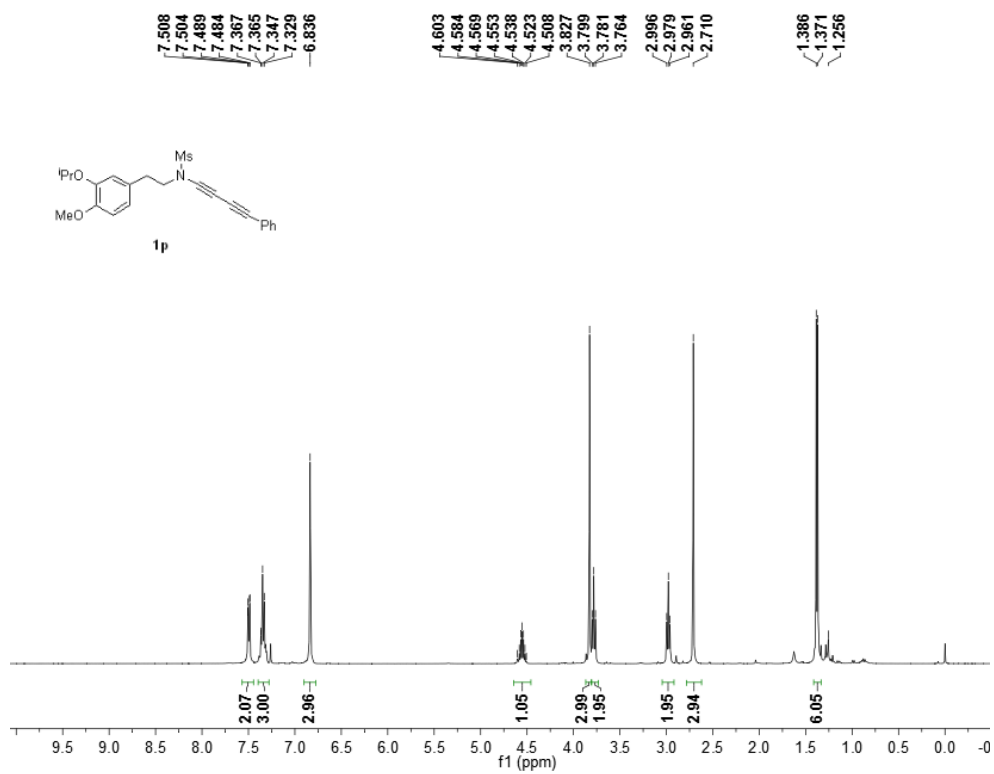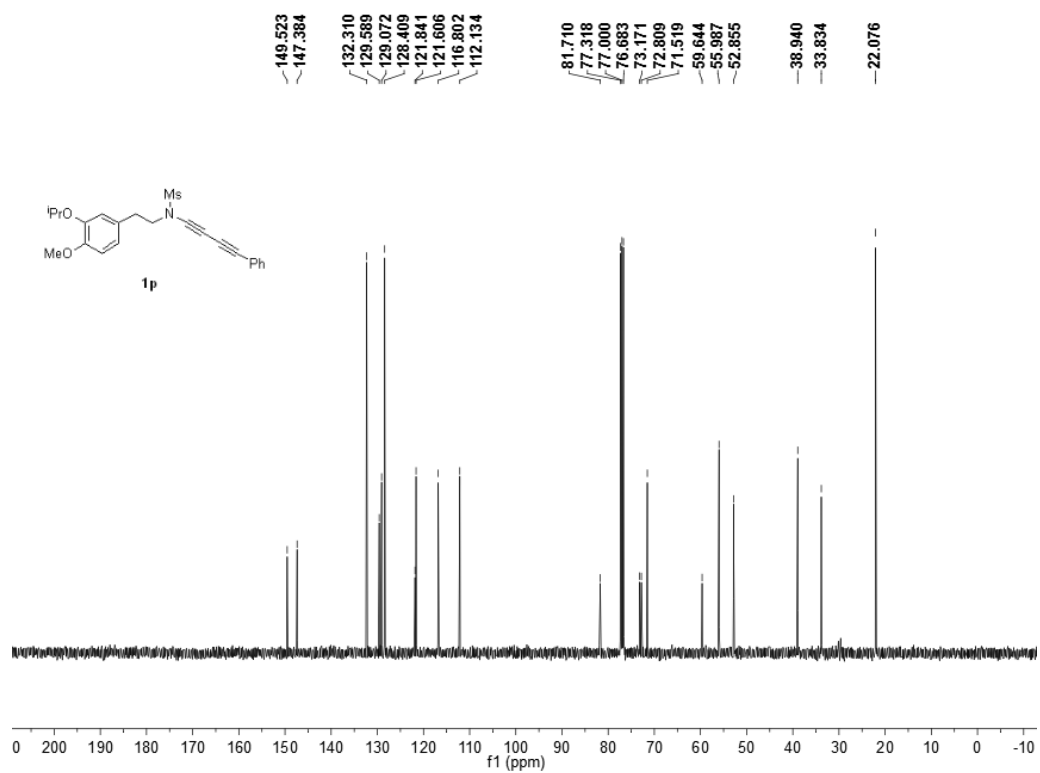

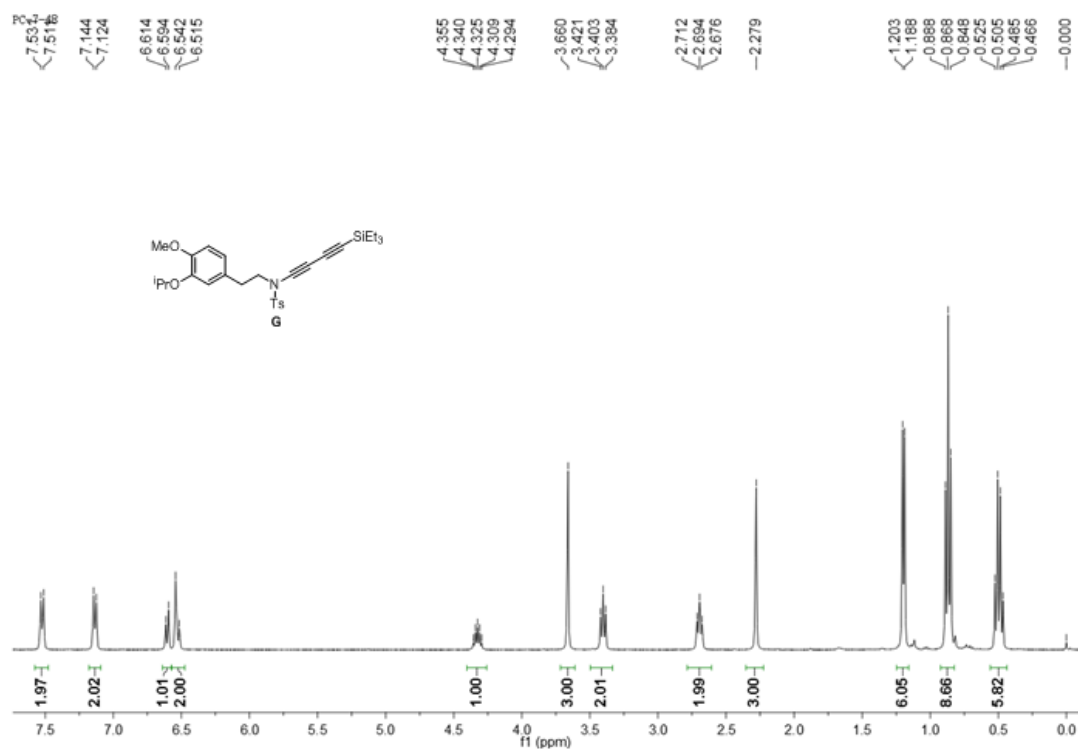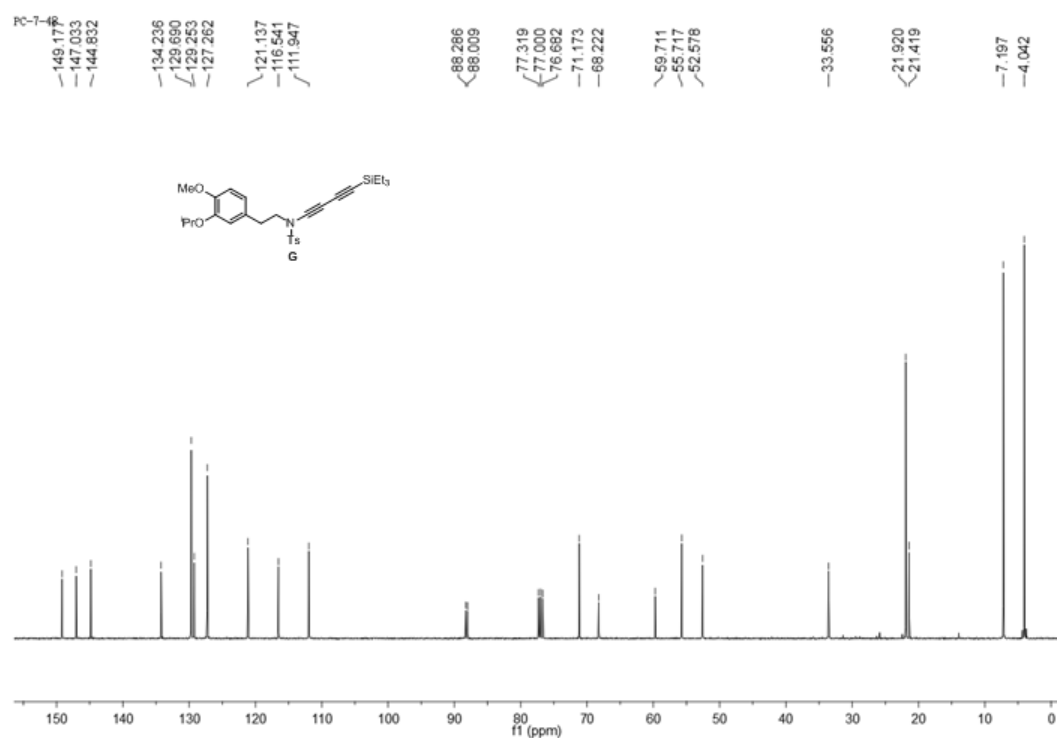

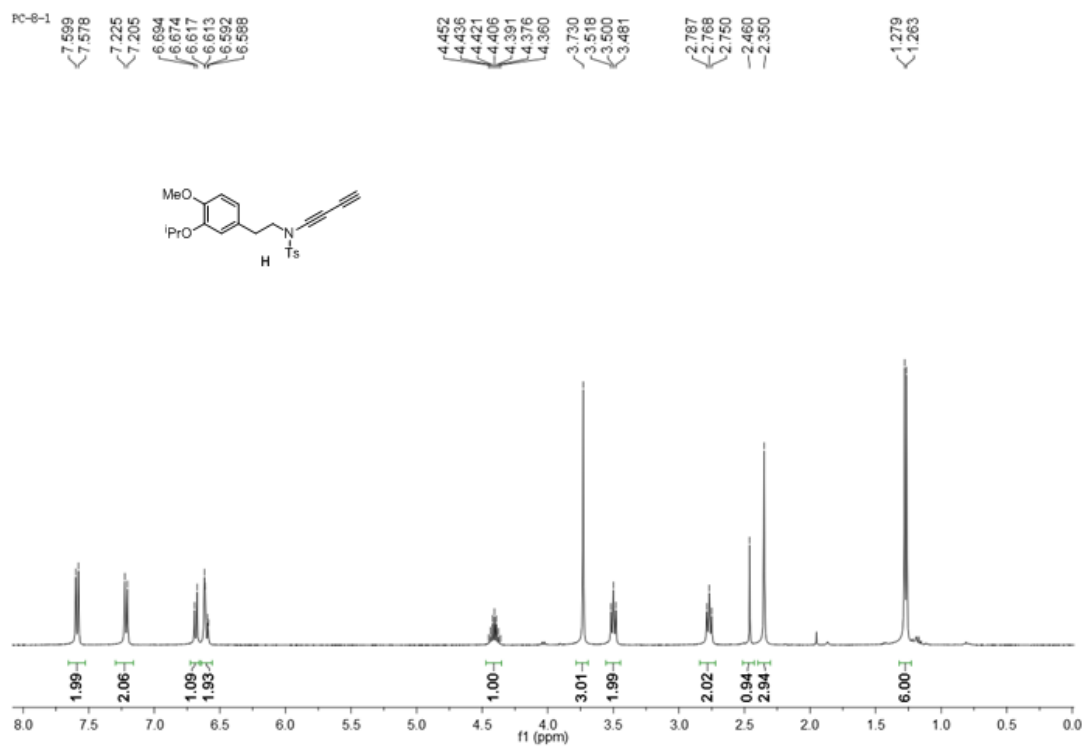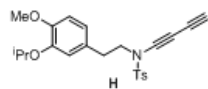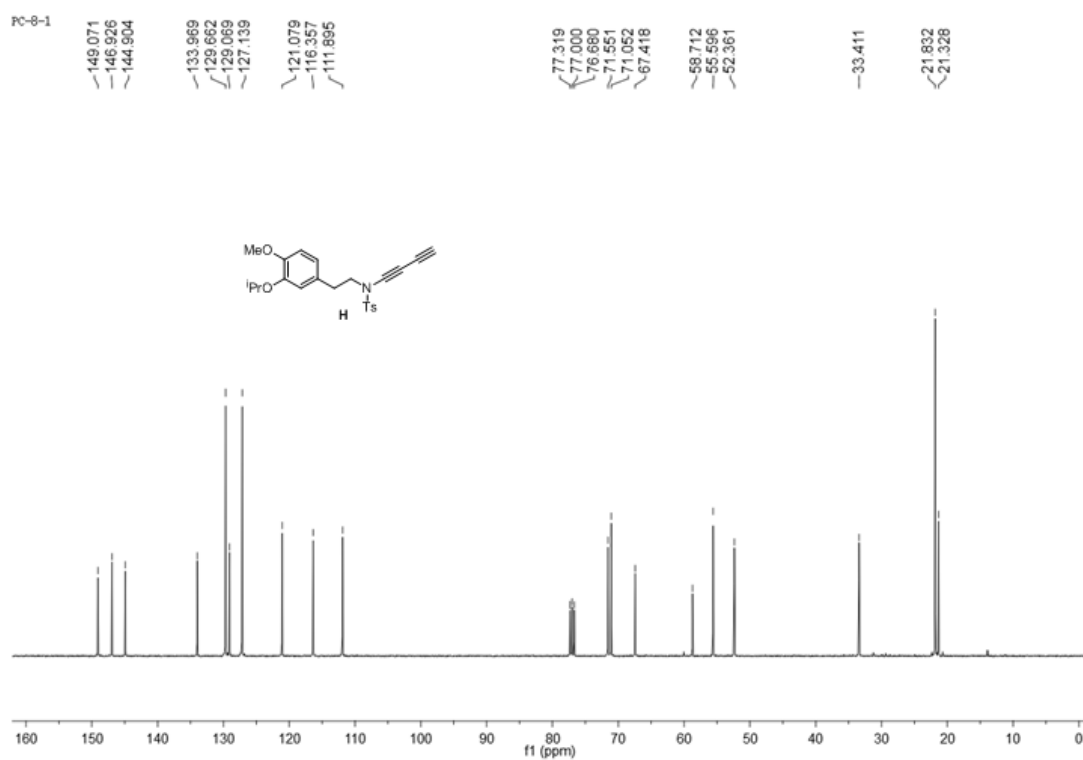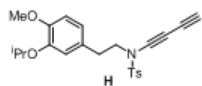



PC-8-2

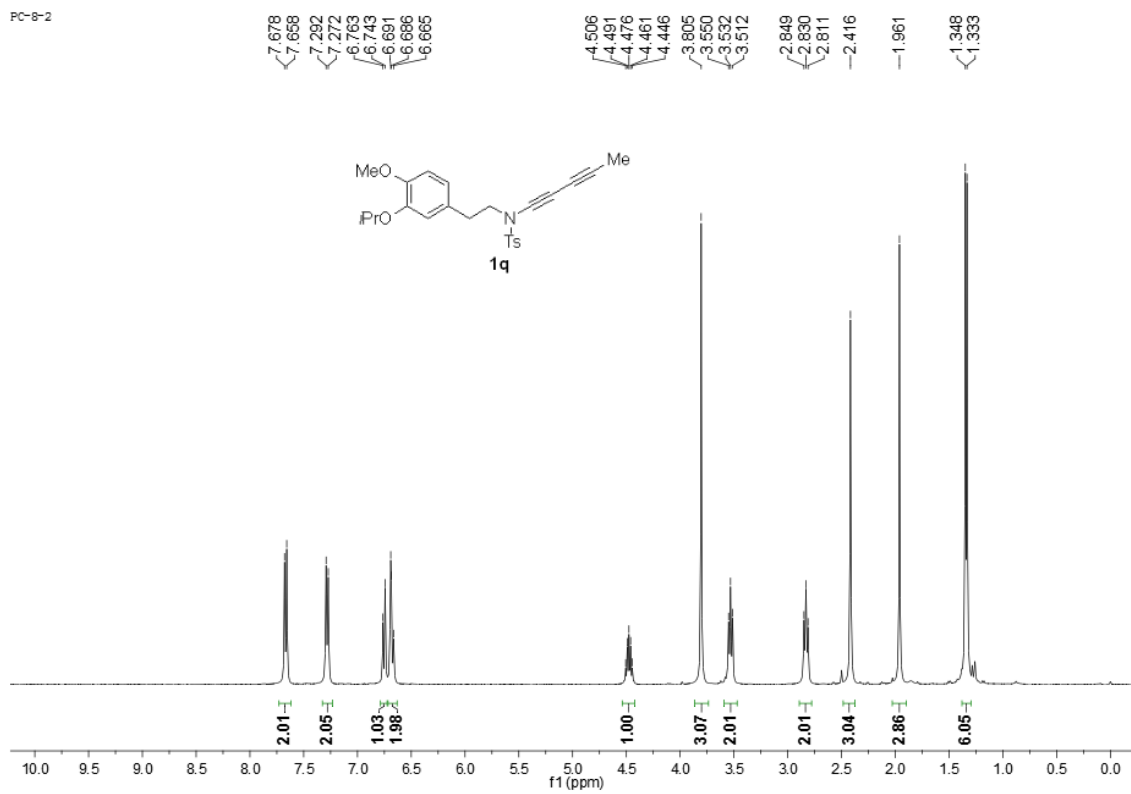

PC-8-2

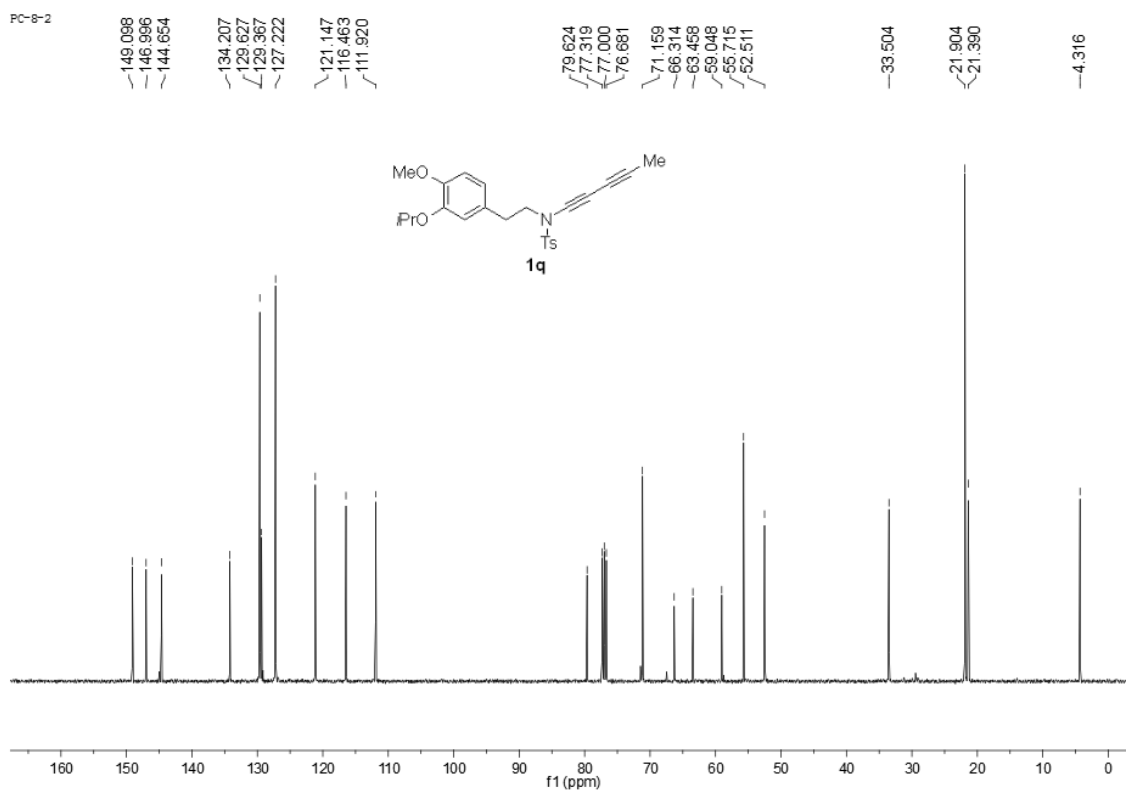

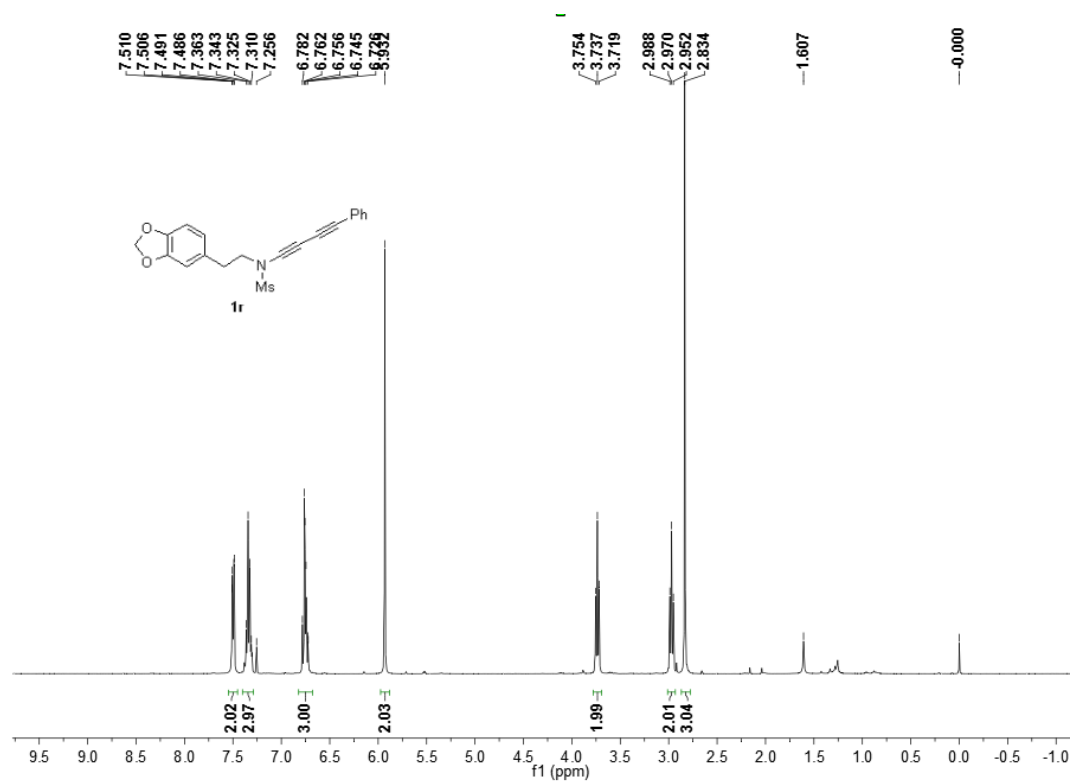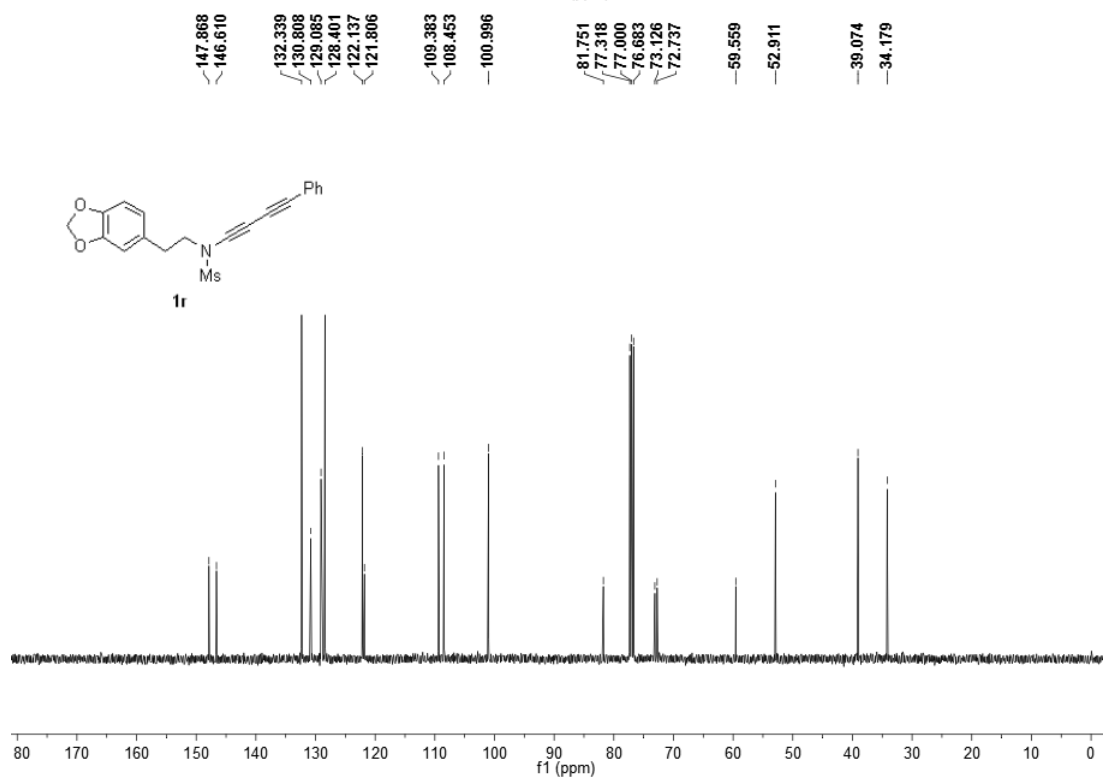

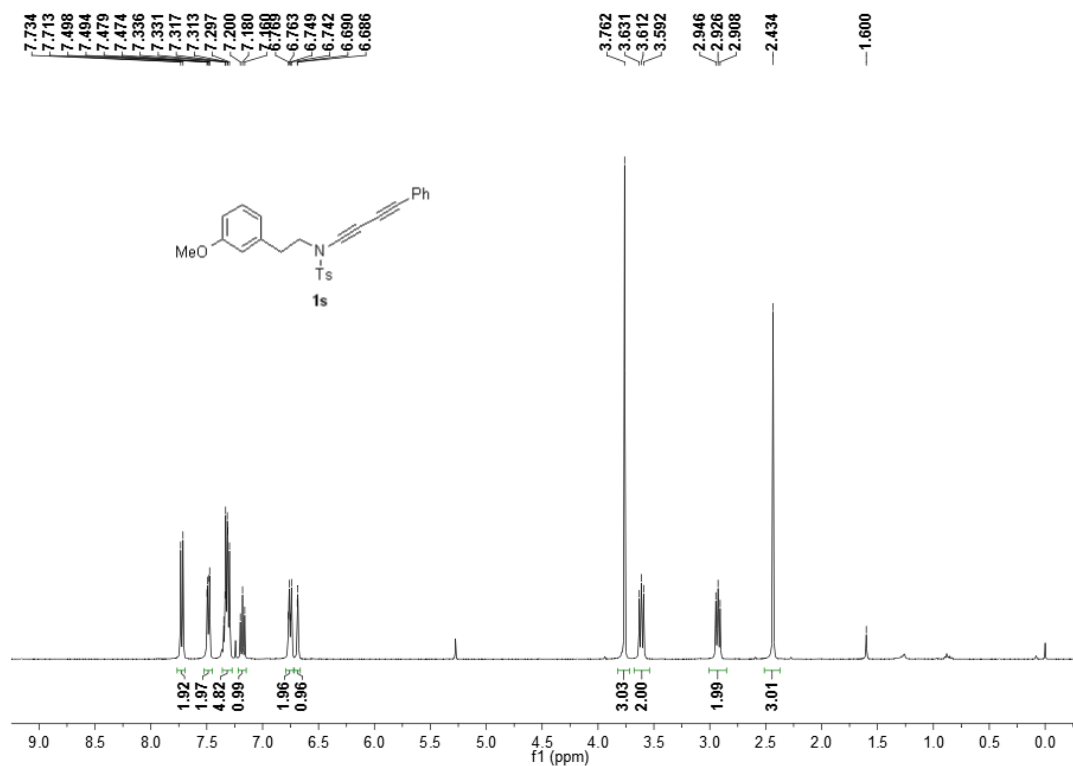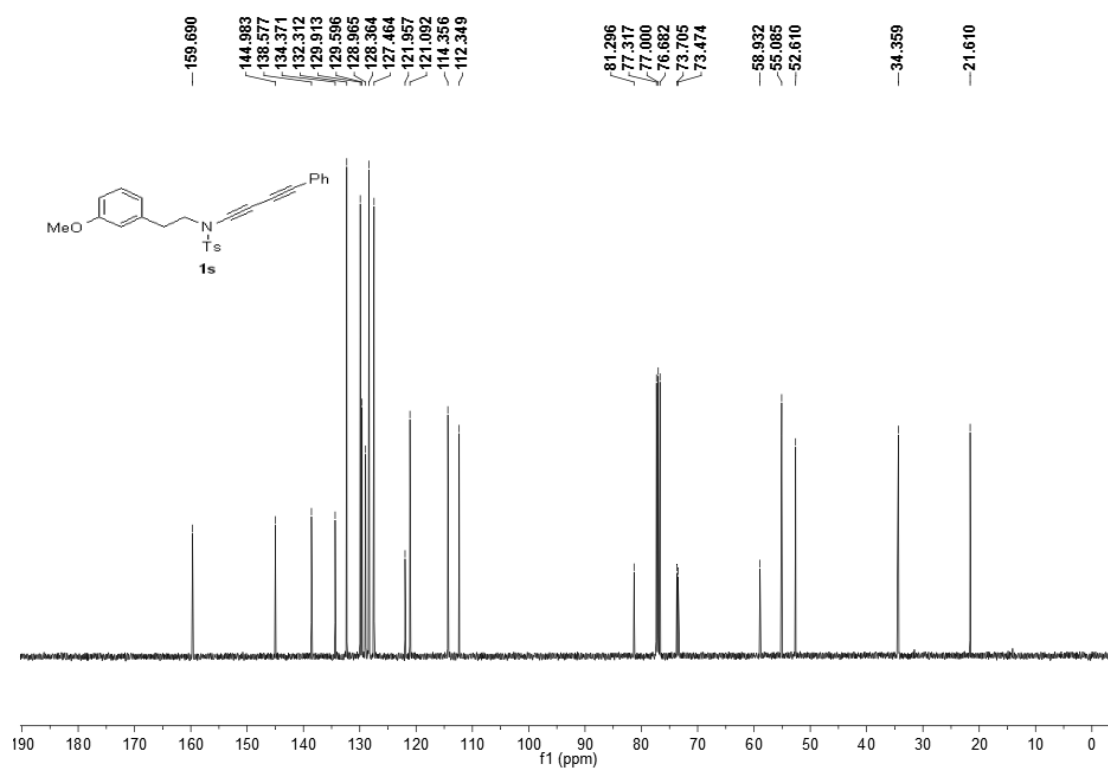

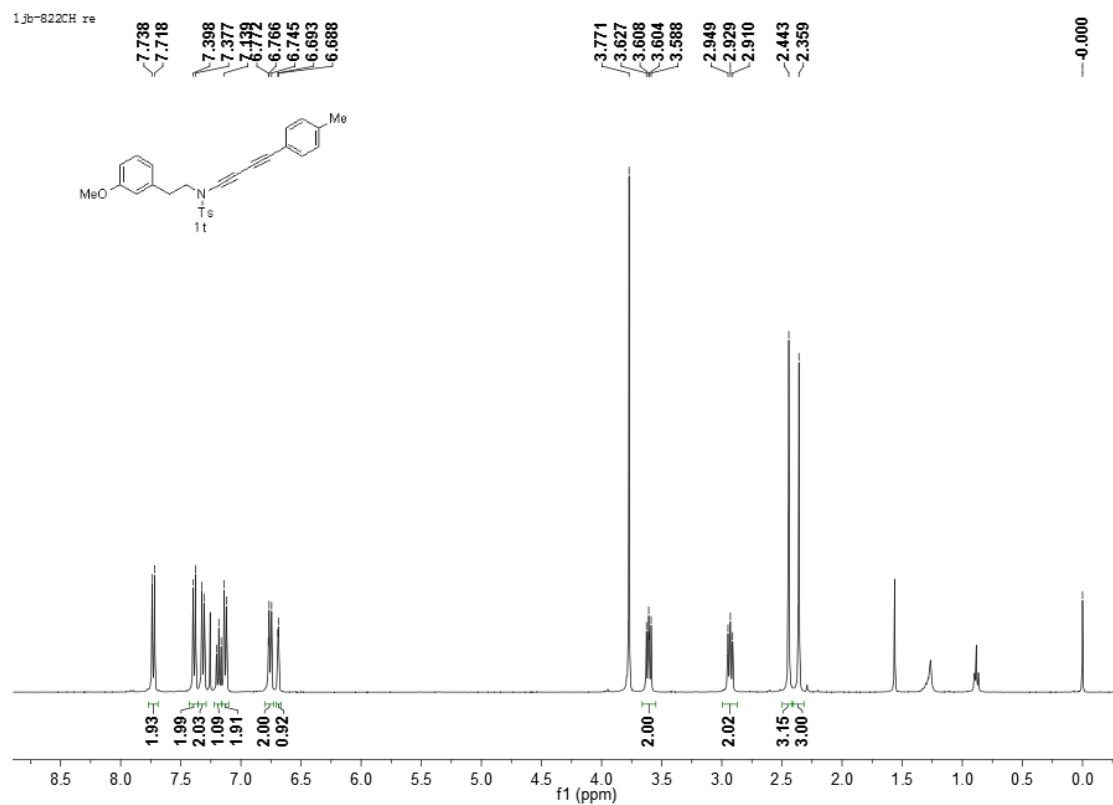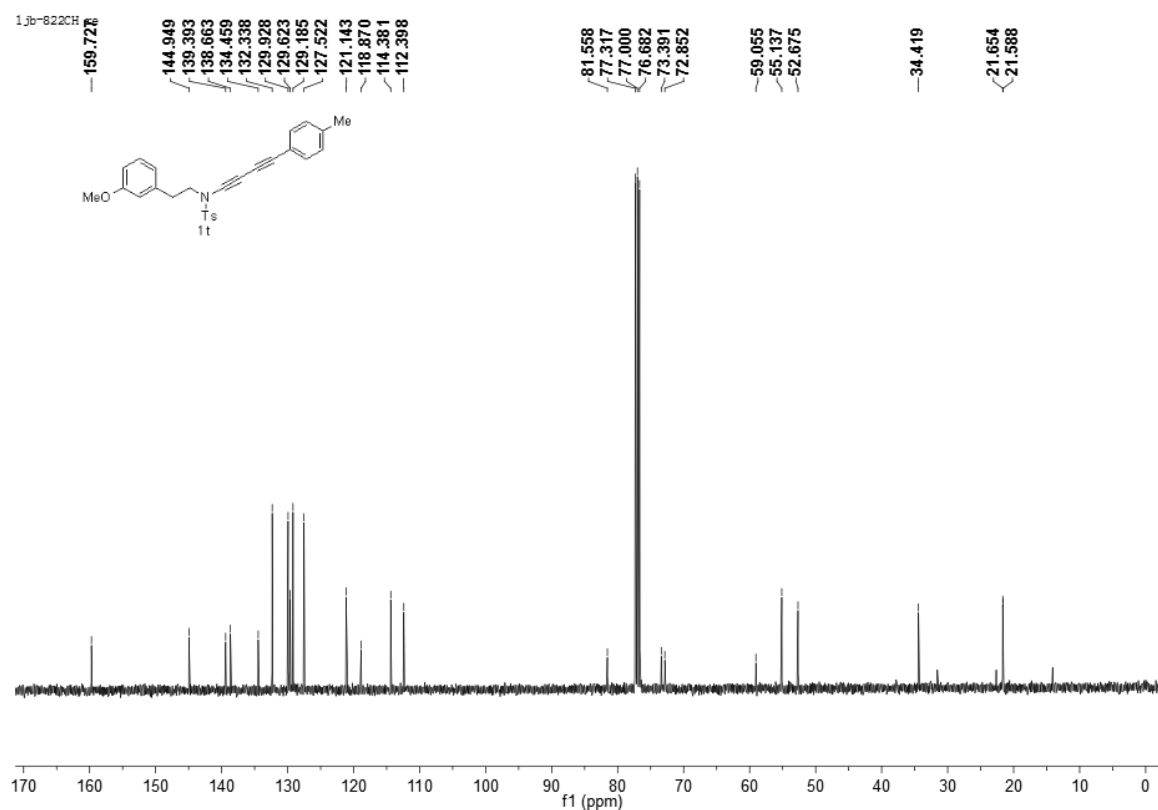

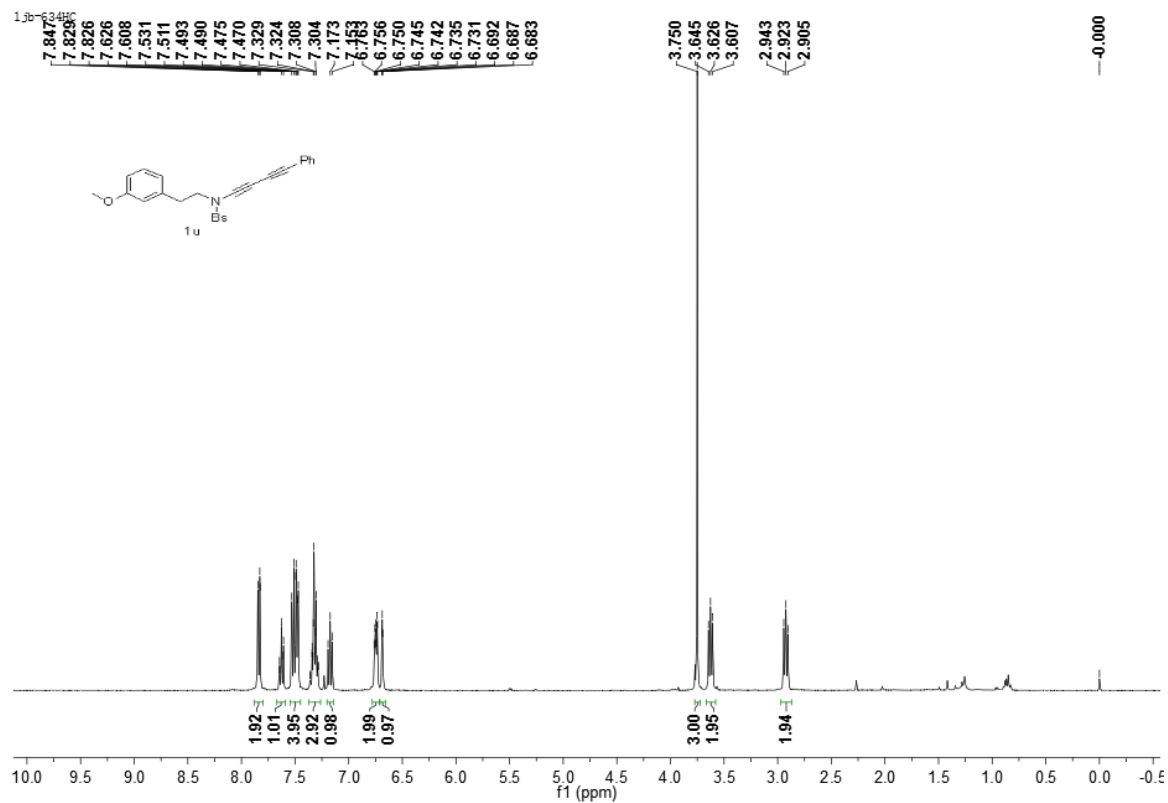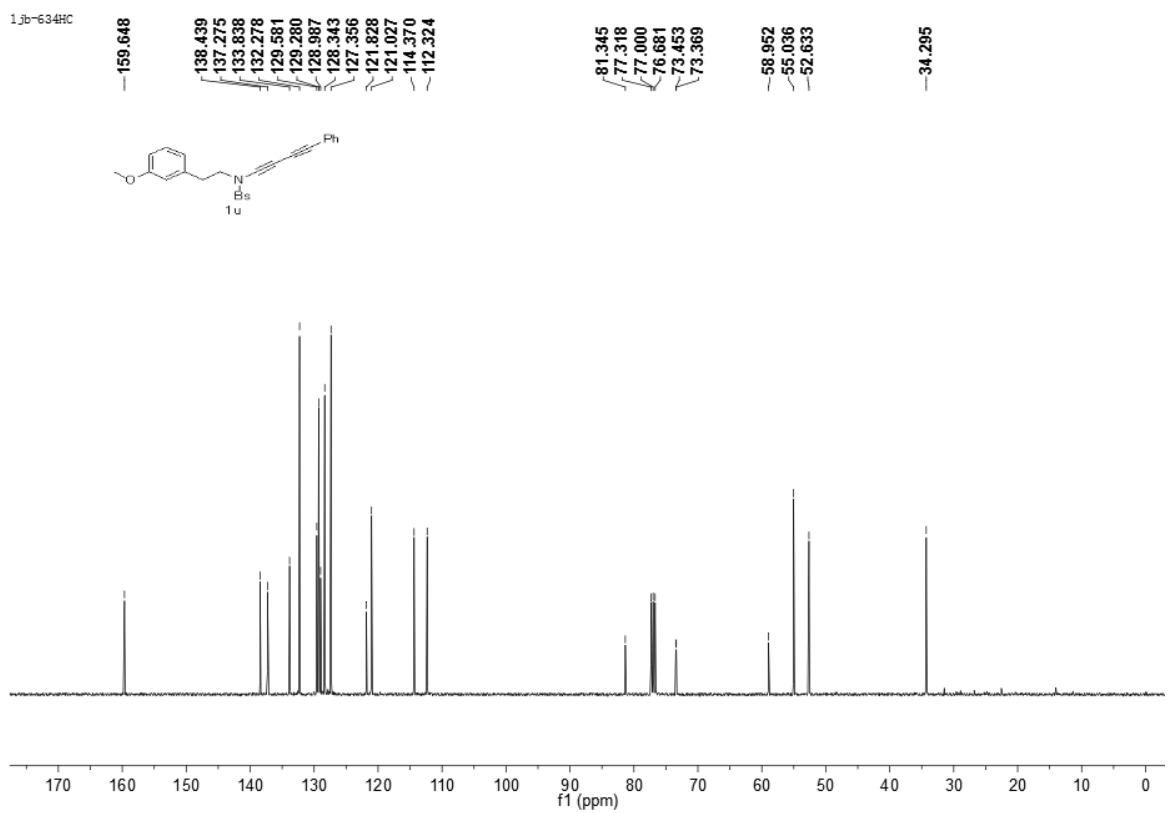



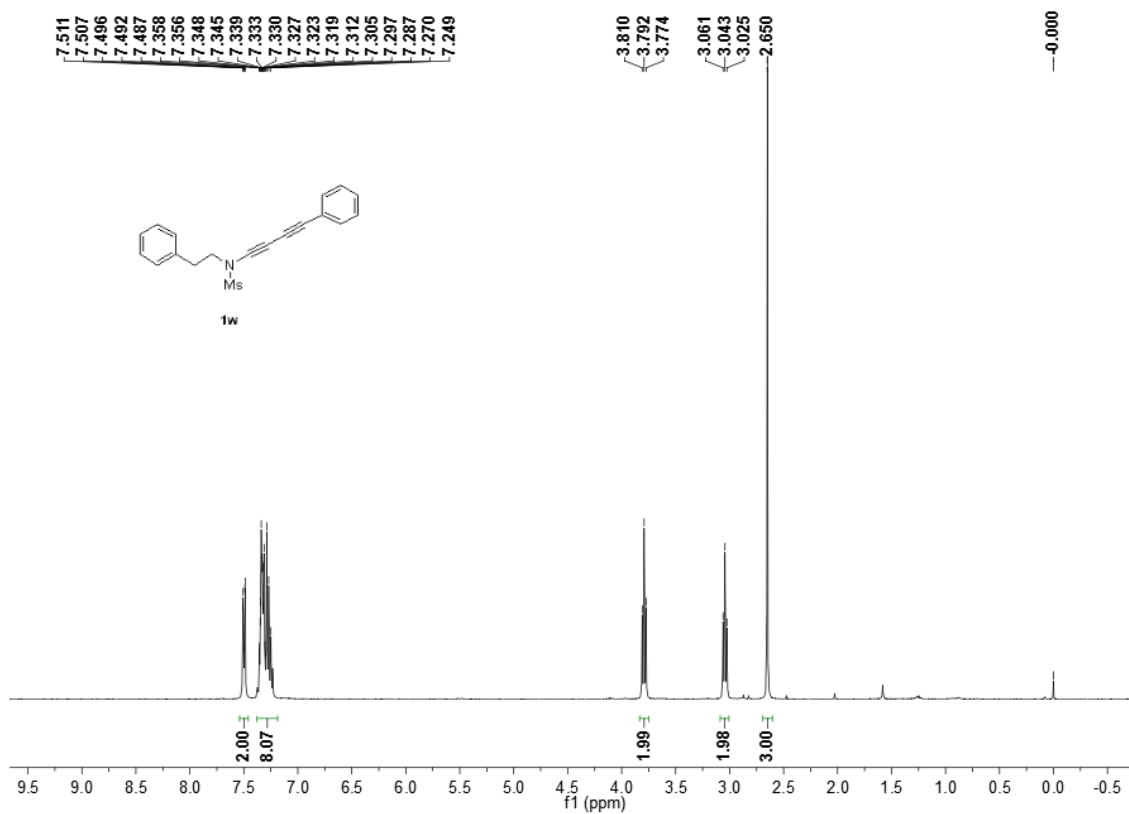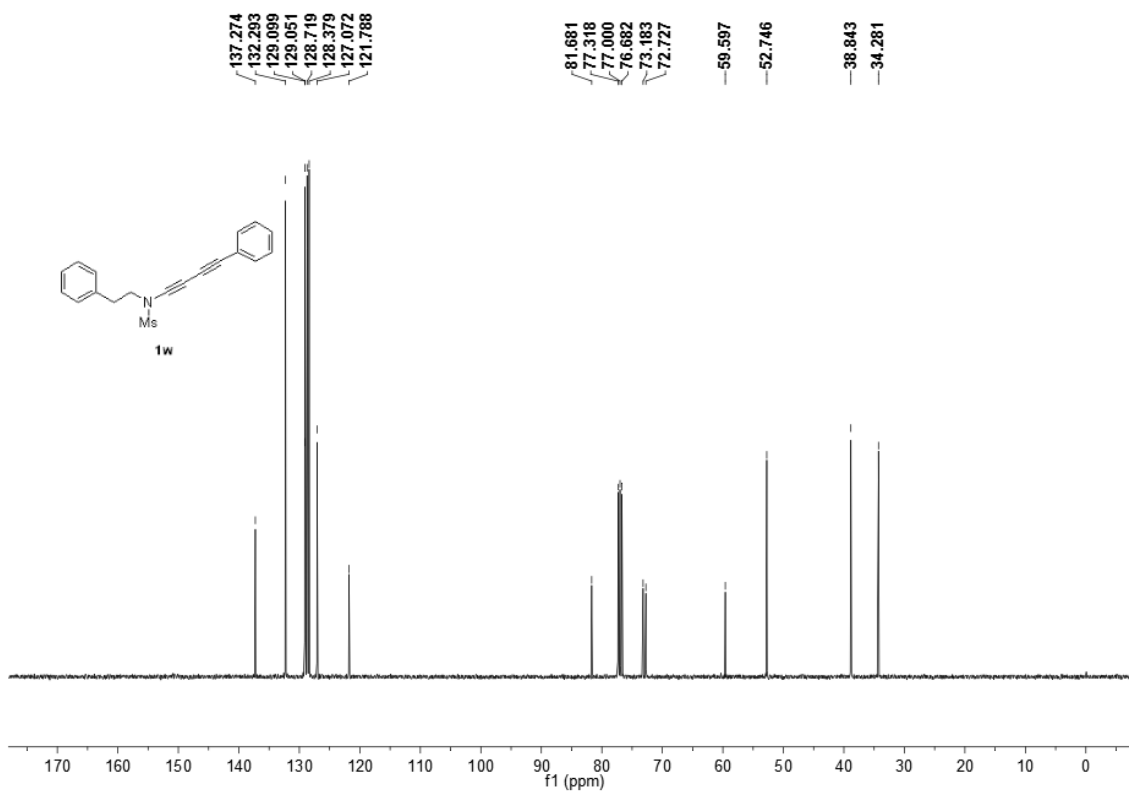

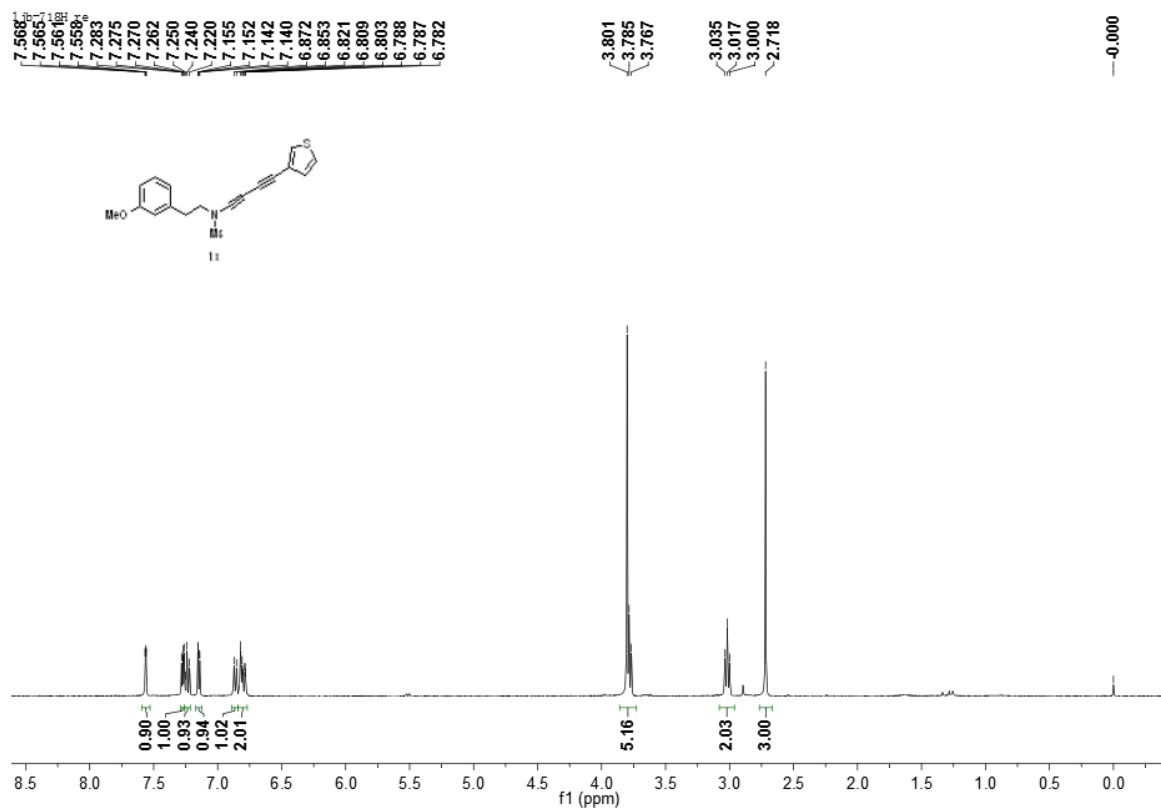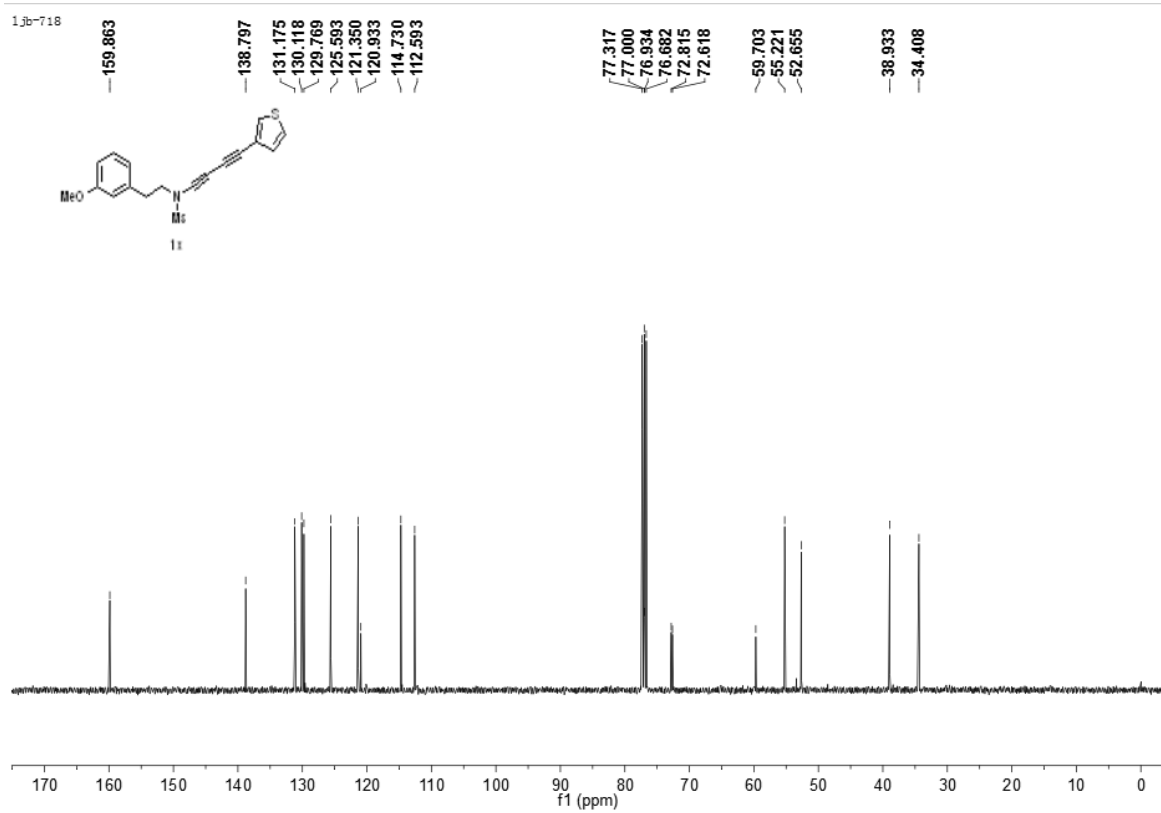



1jb-543

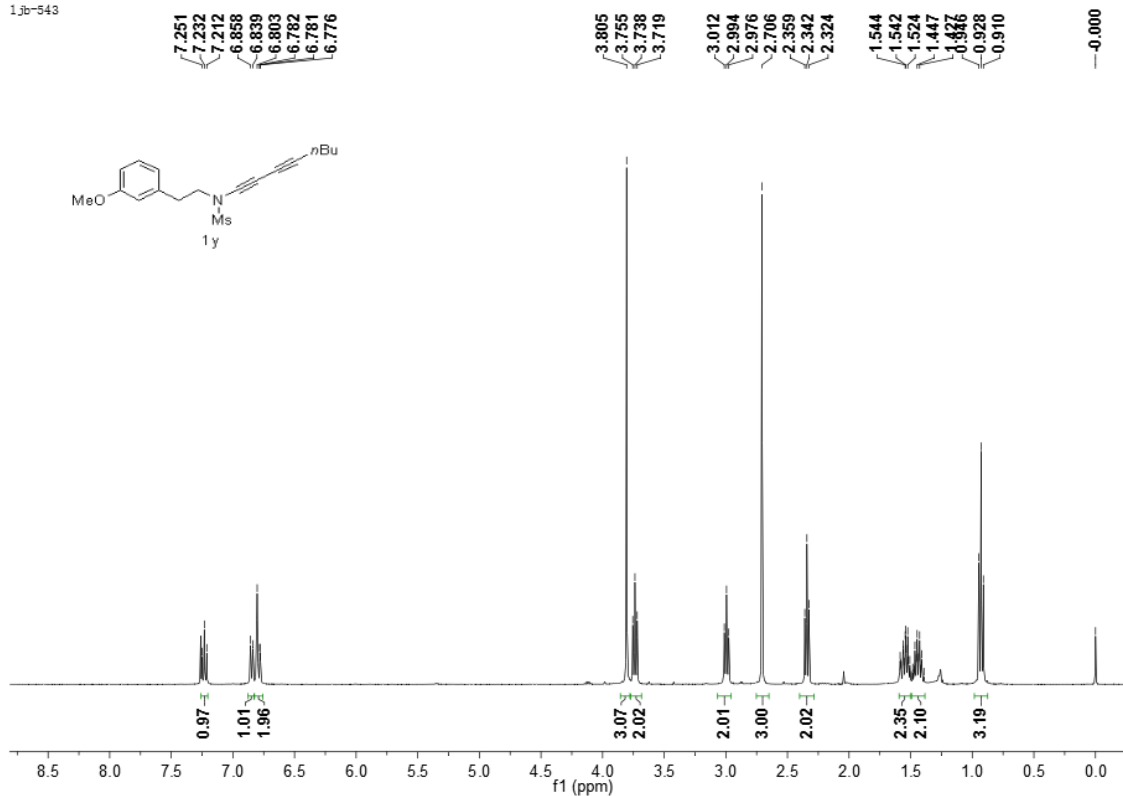

1jb-543

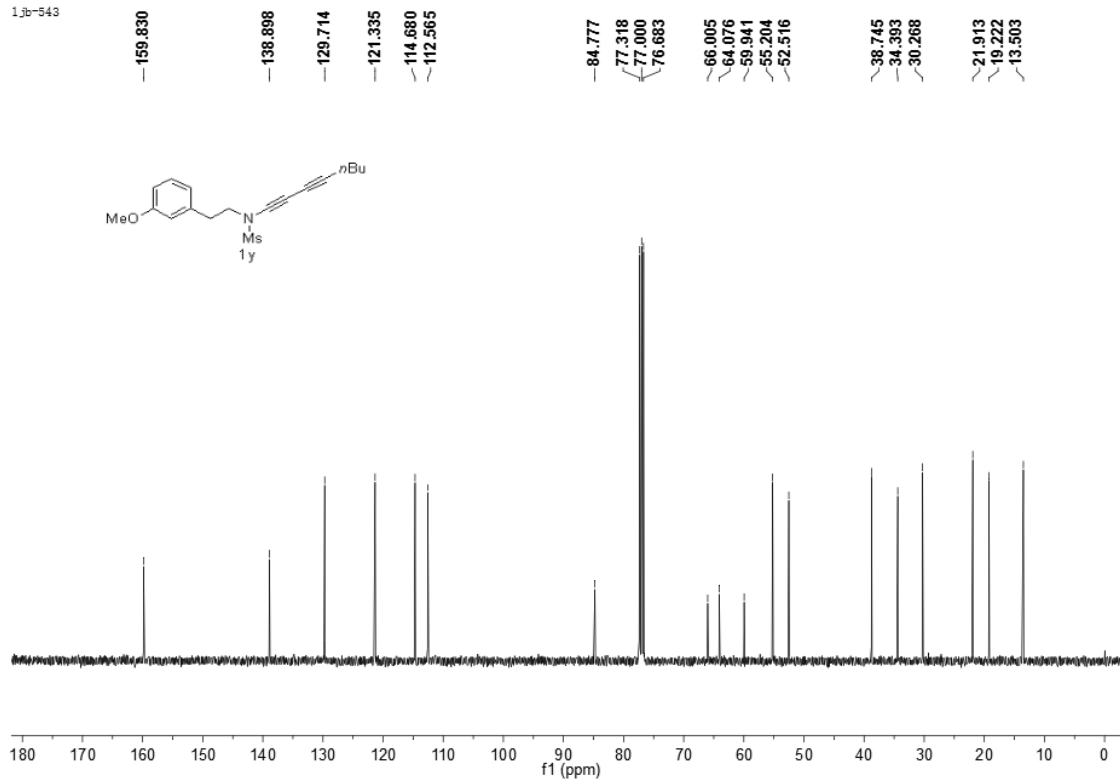

1j0-922CH

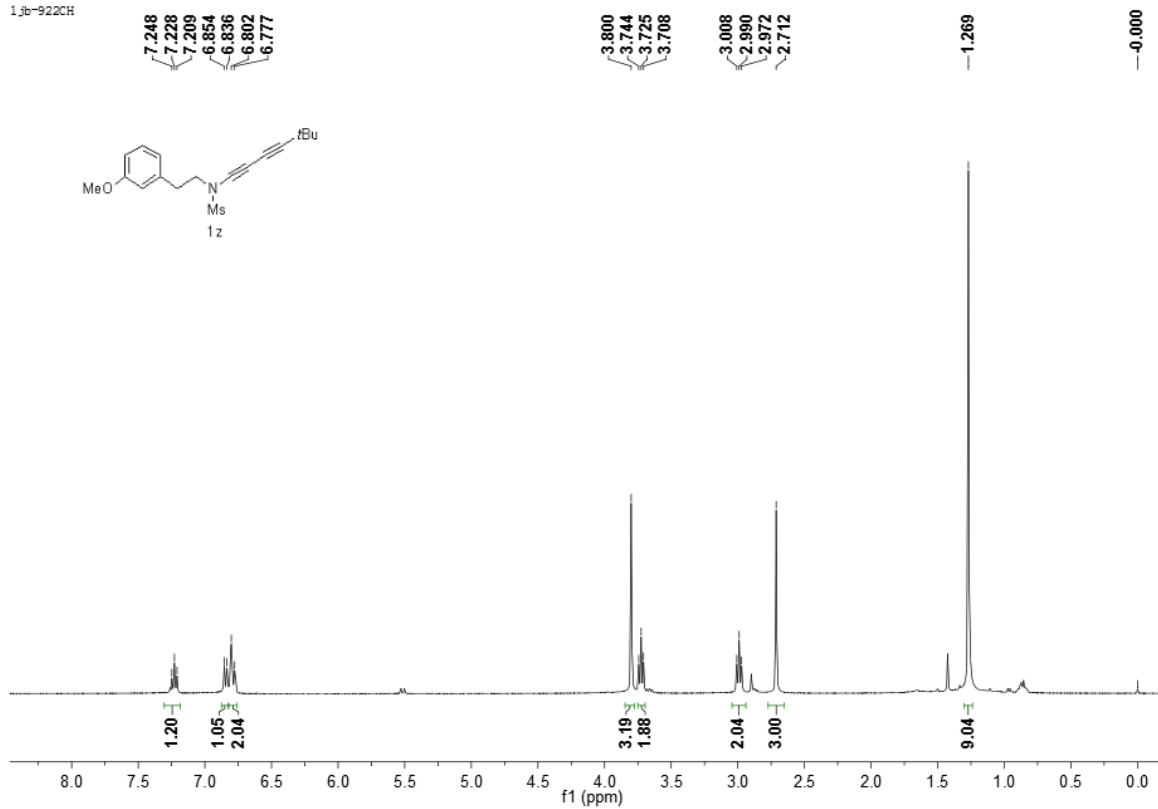

1j0-922CH

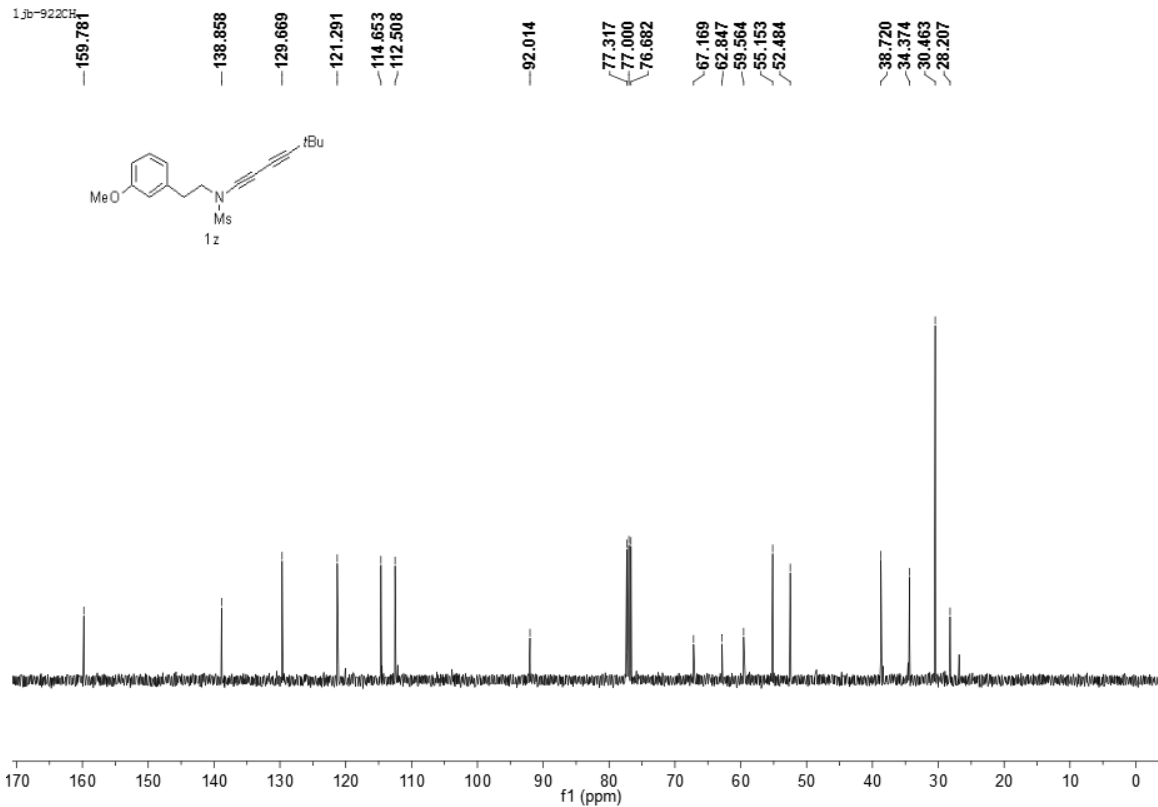

1jb-712CH

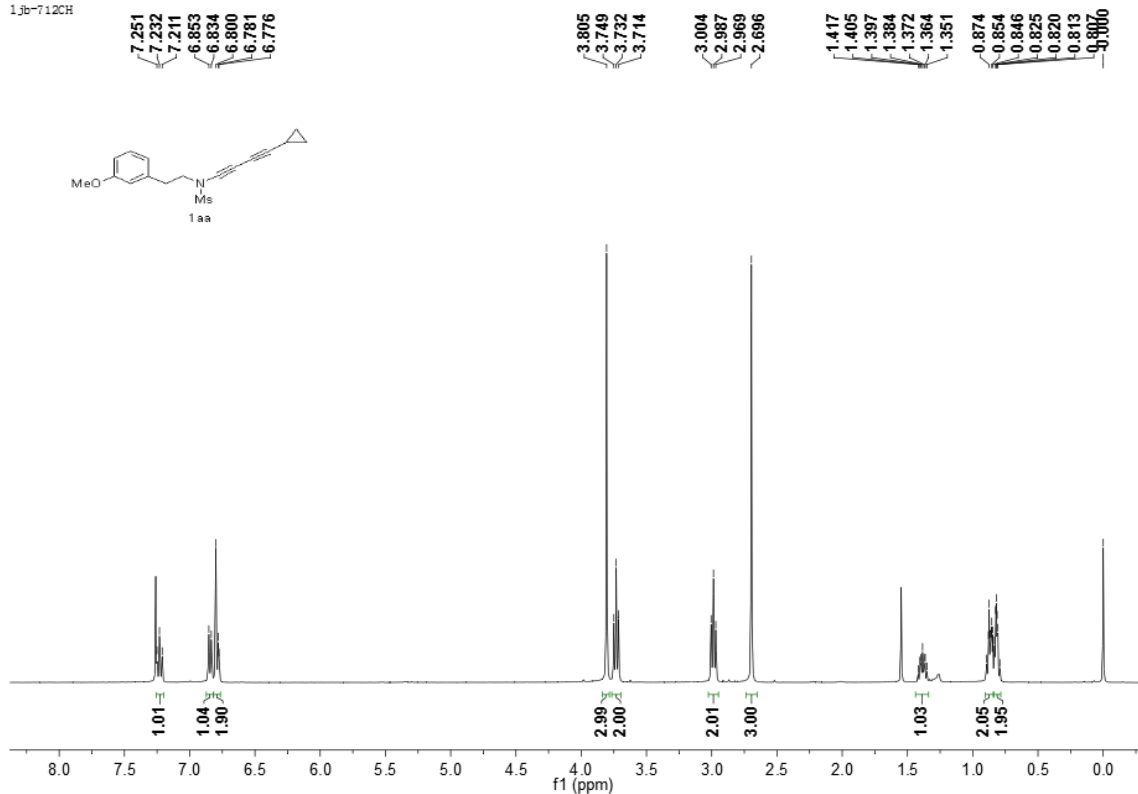

1jb-712

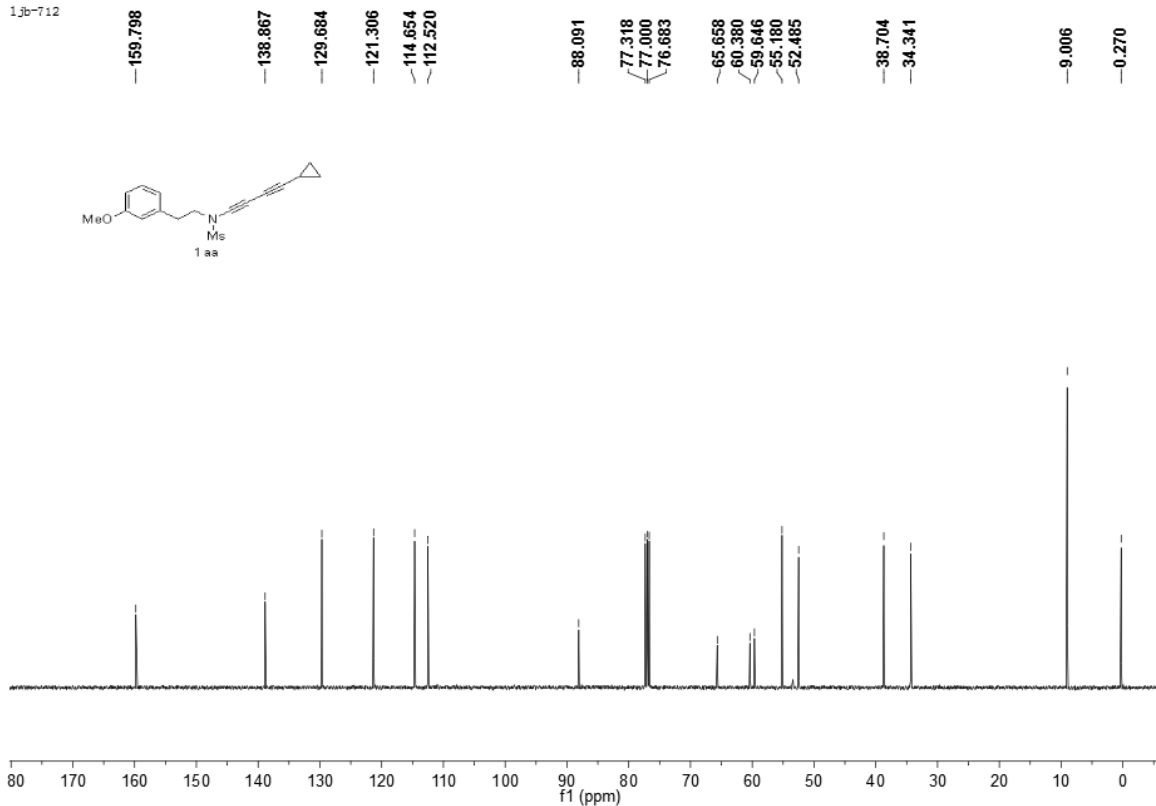

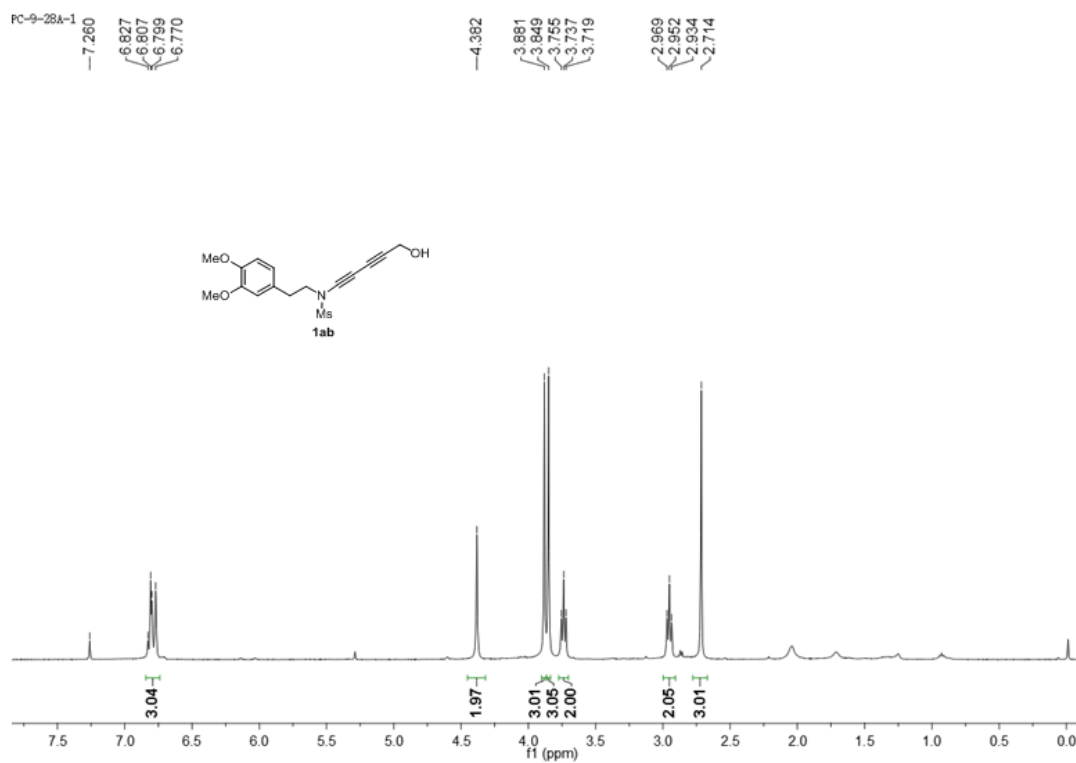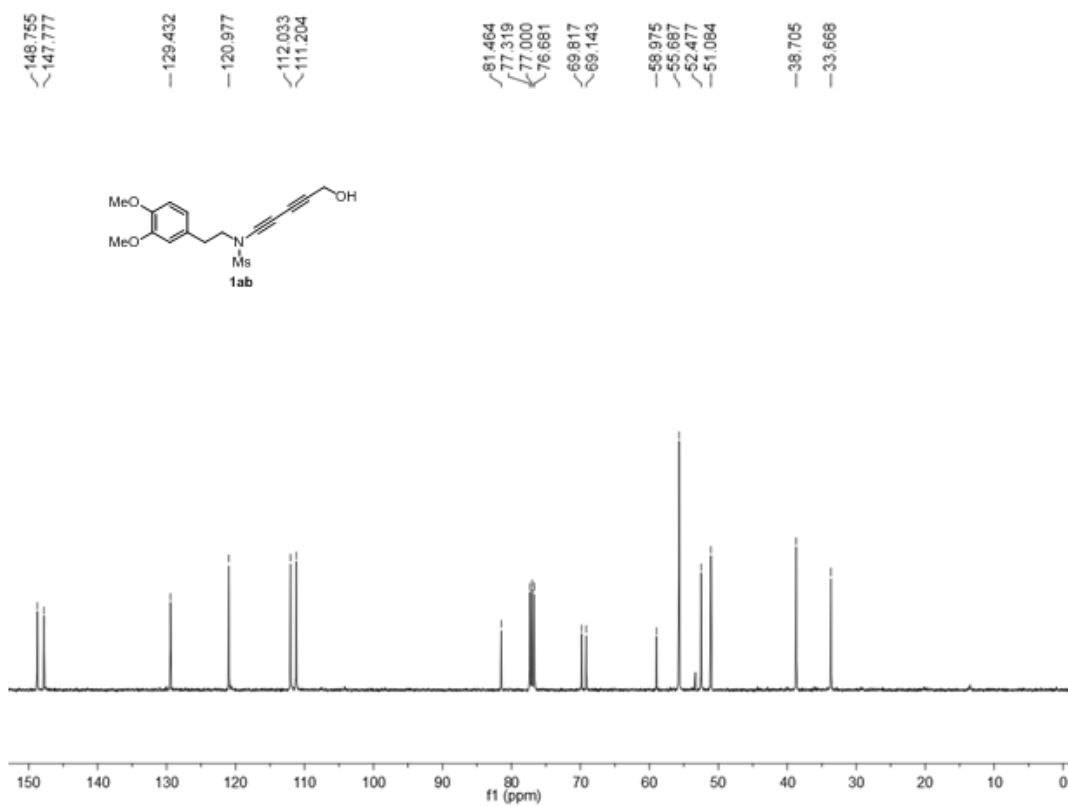

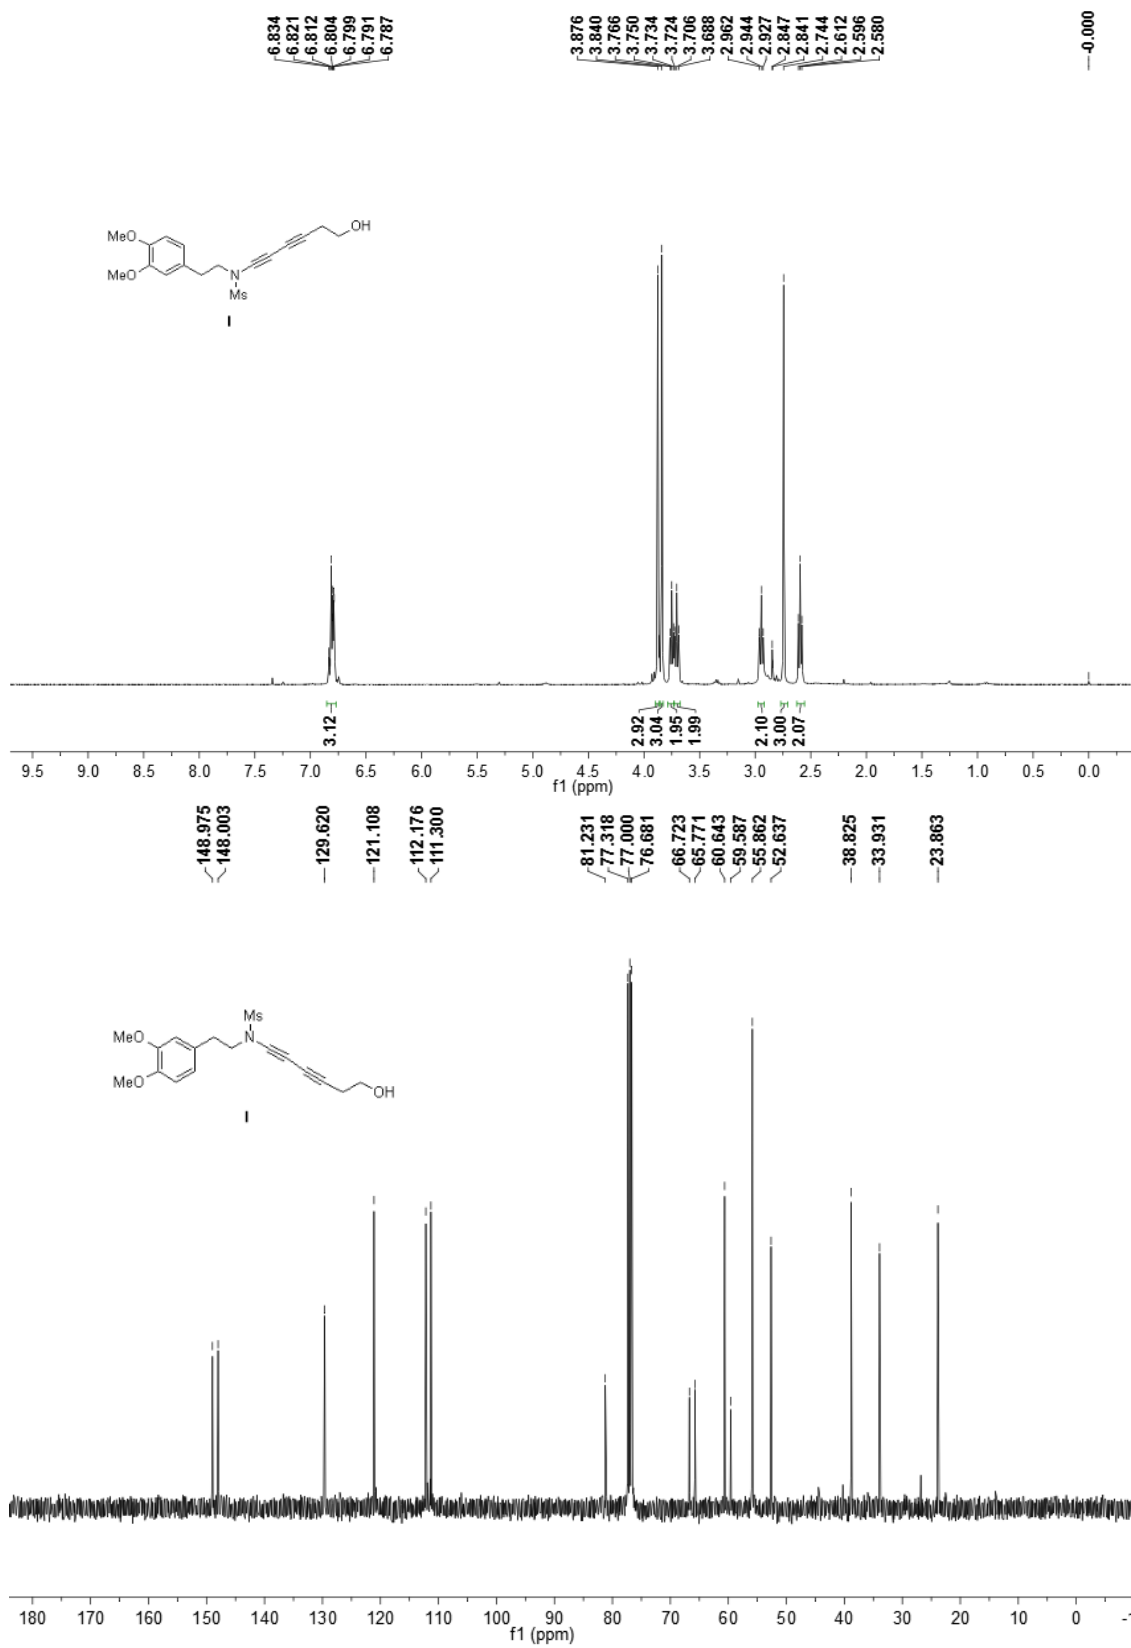

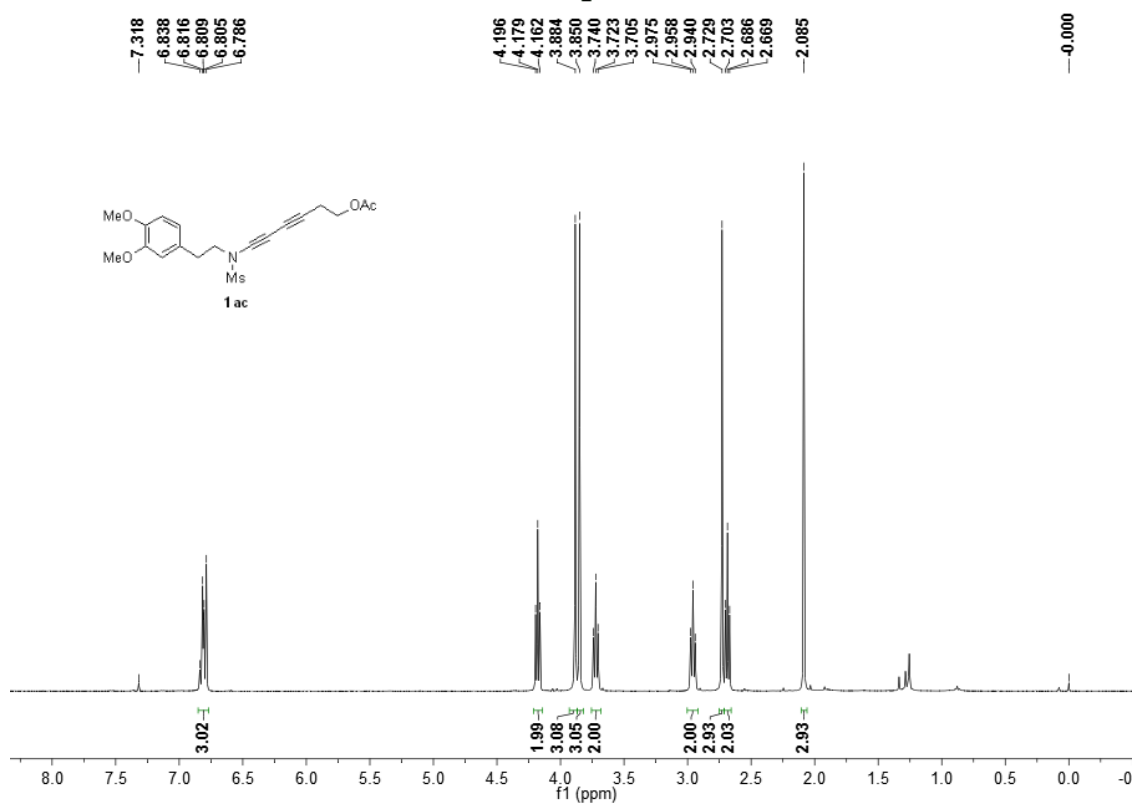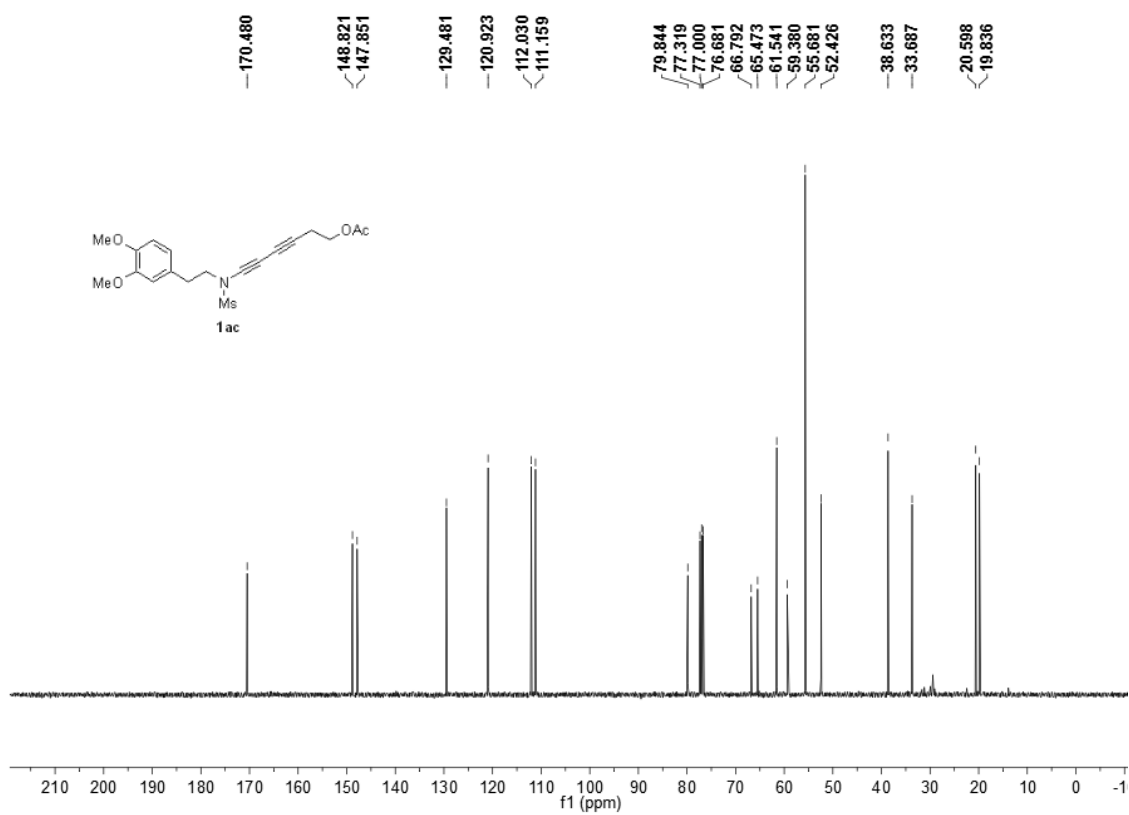

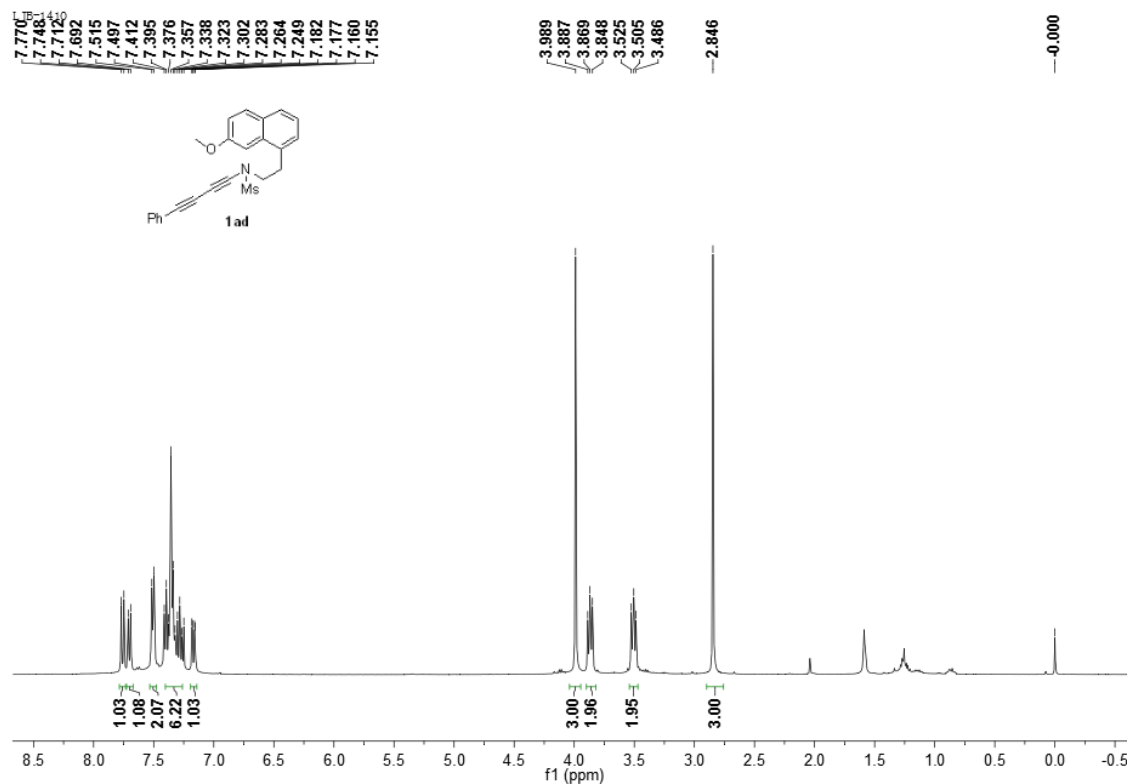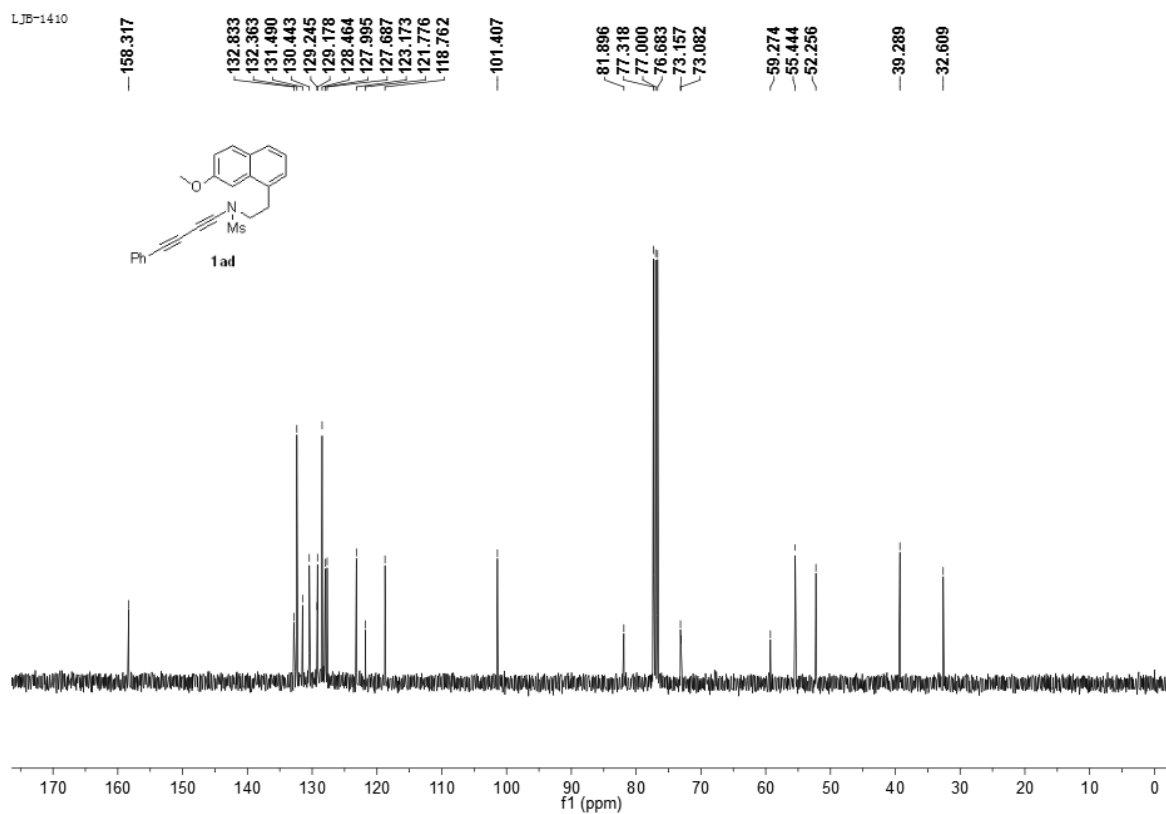

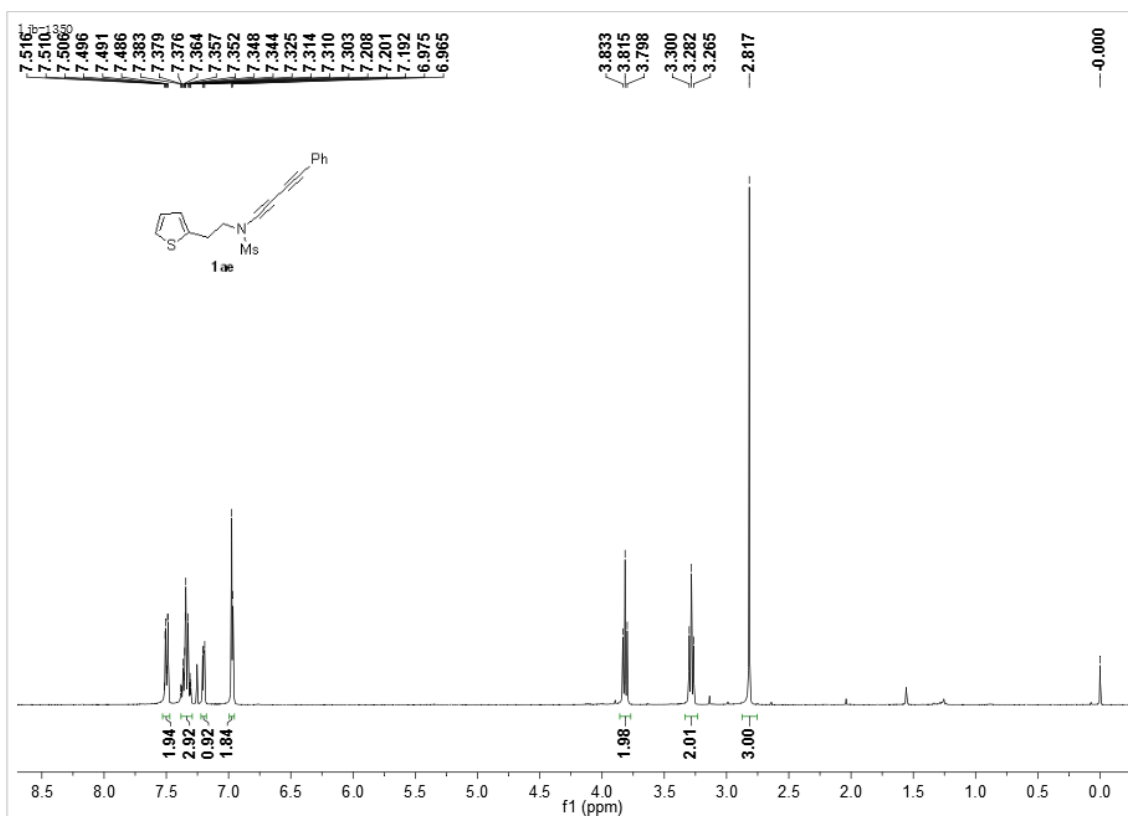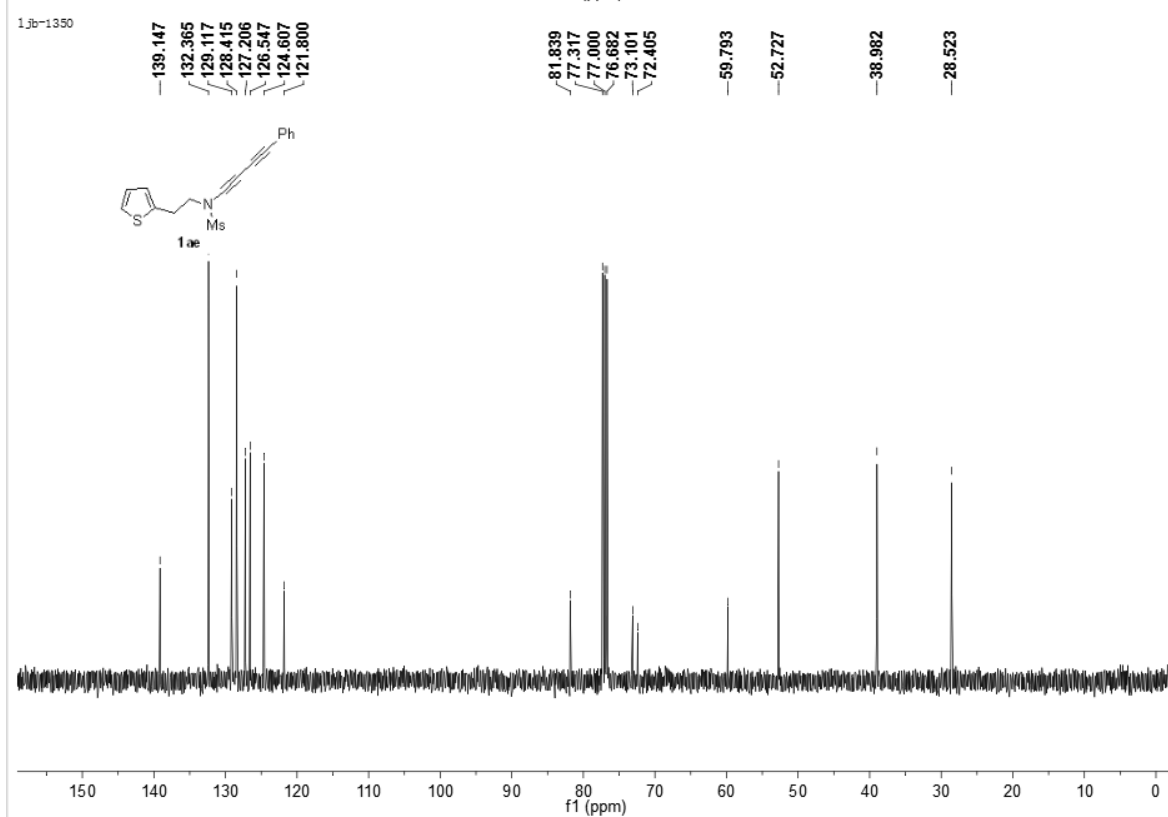



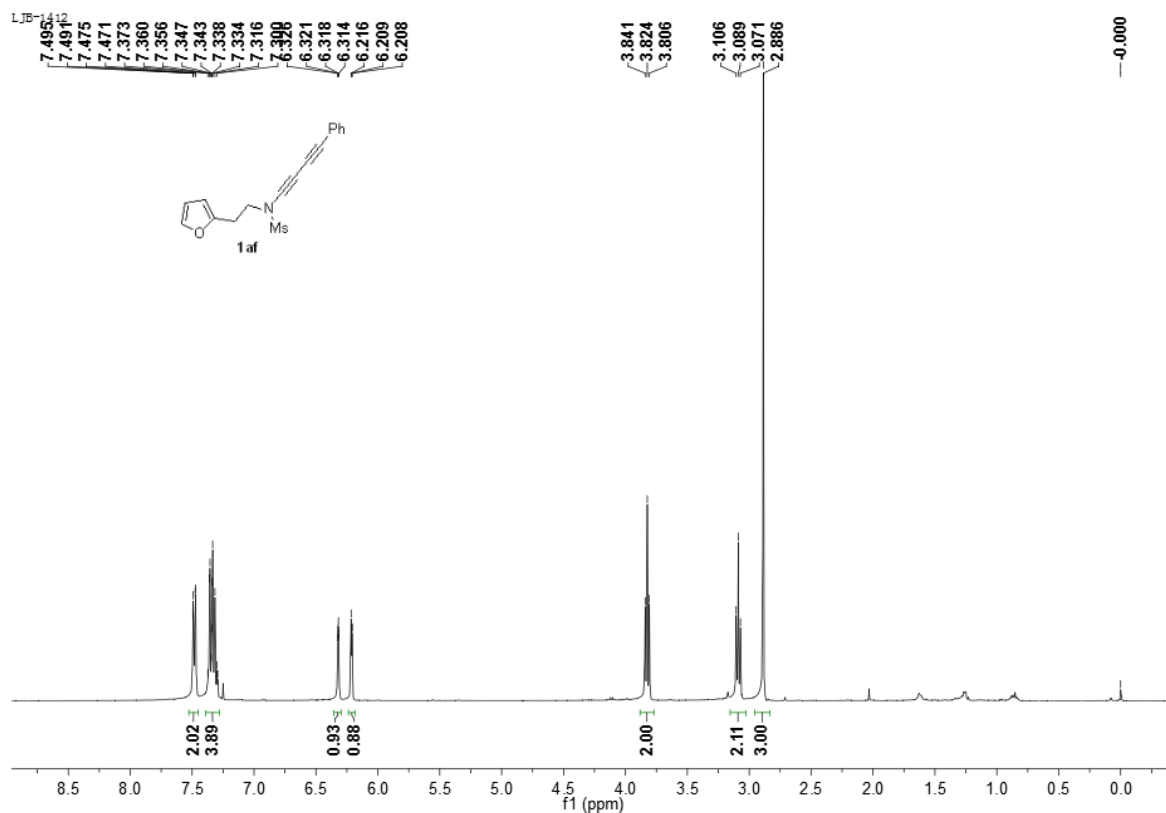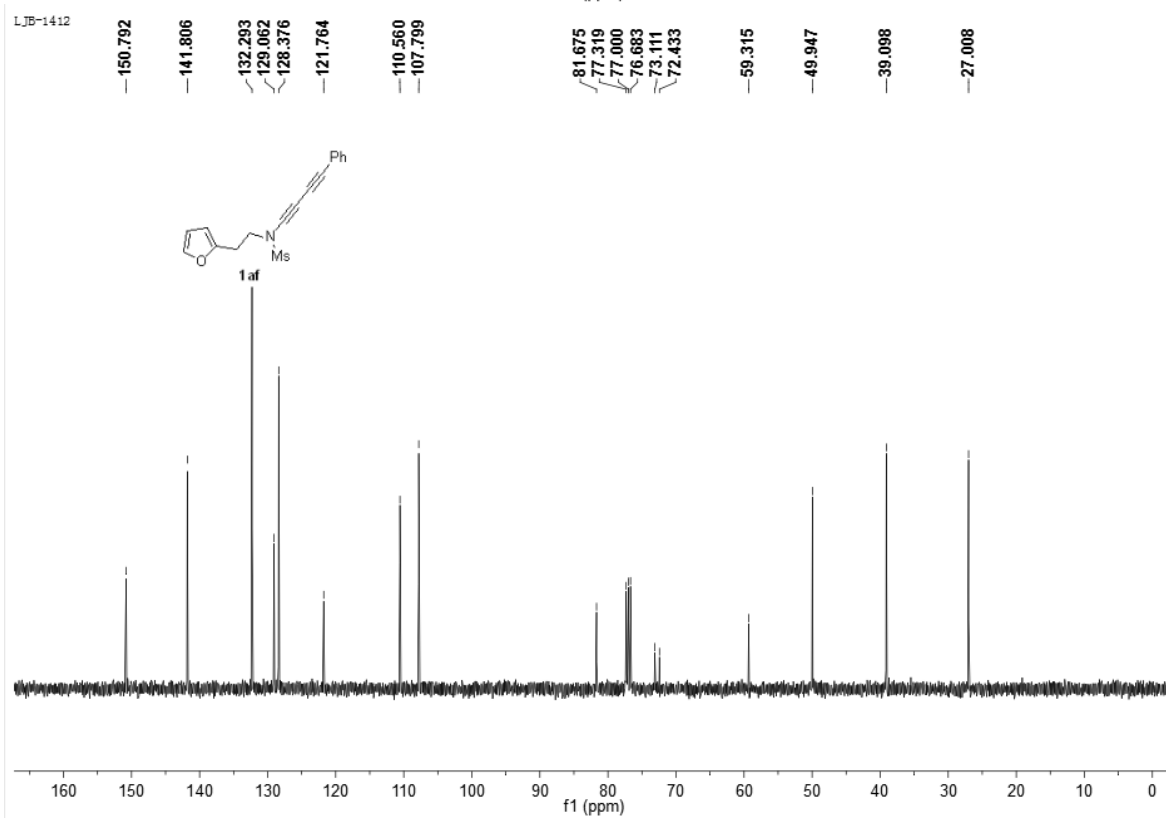

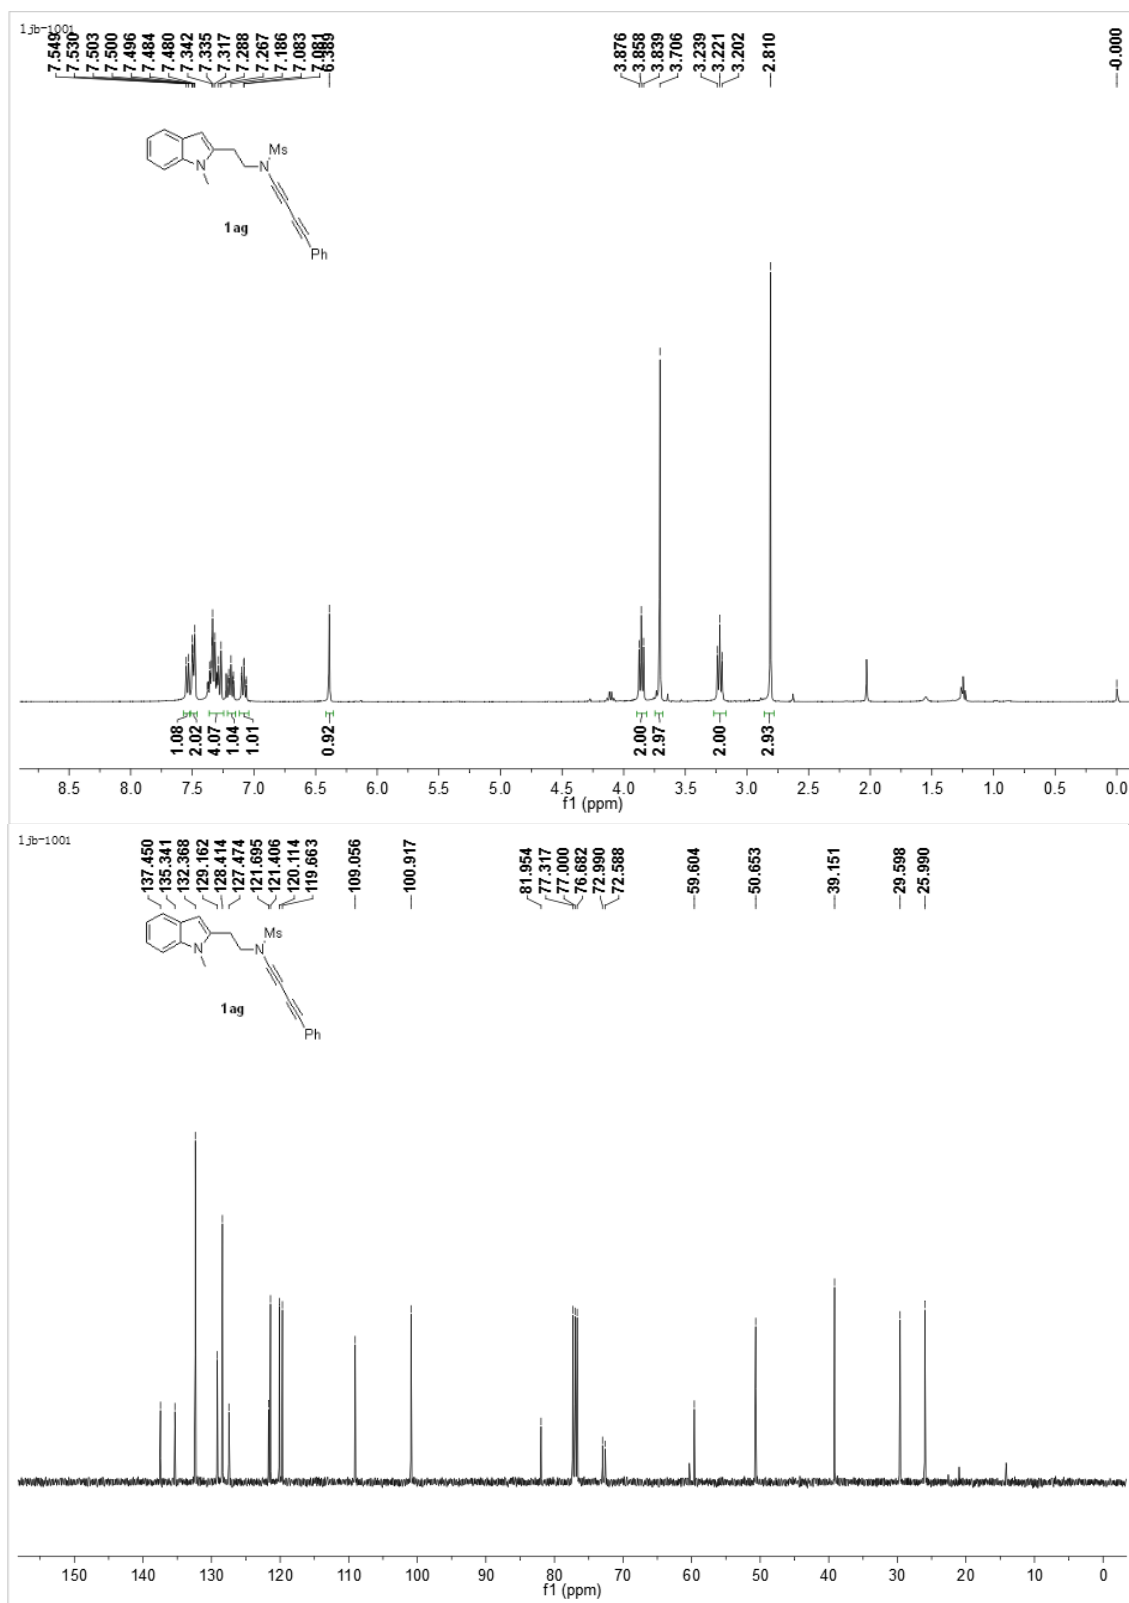

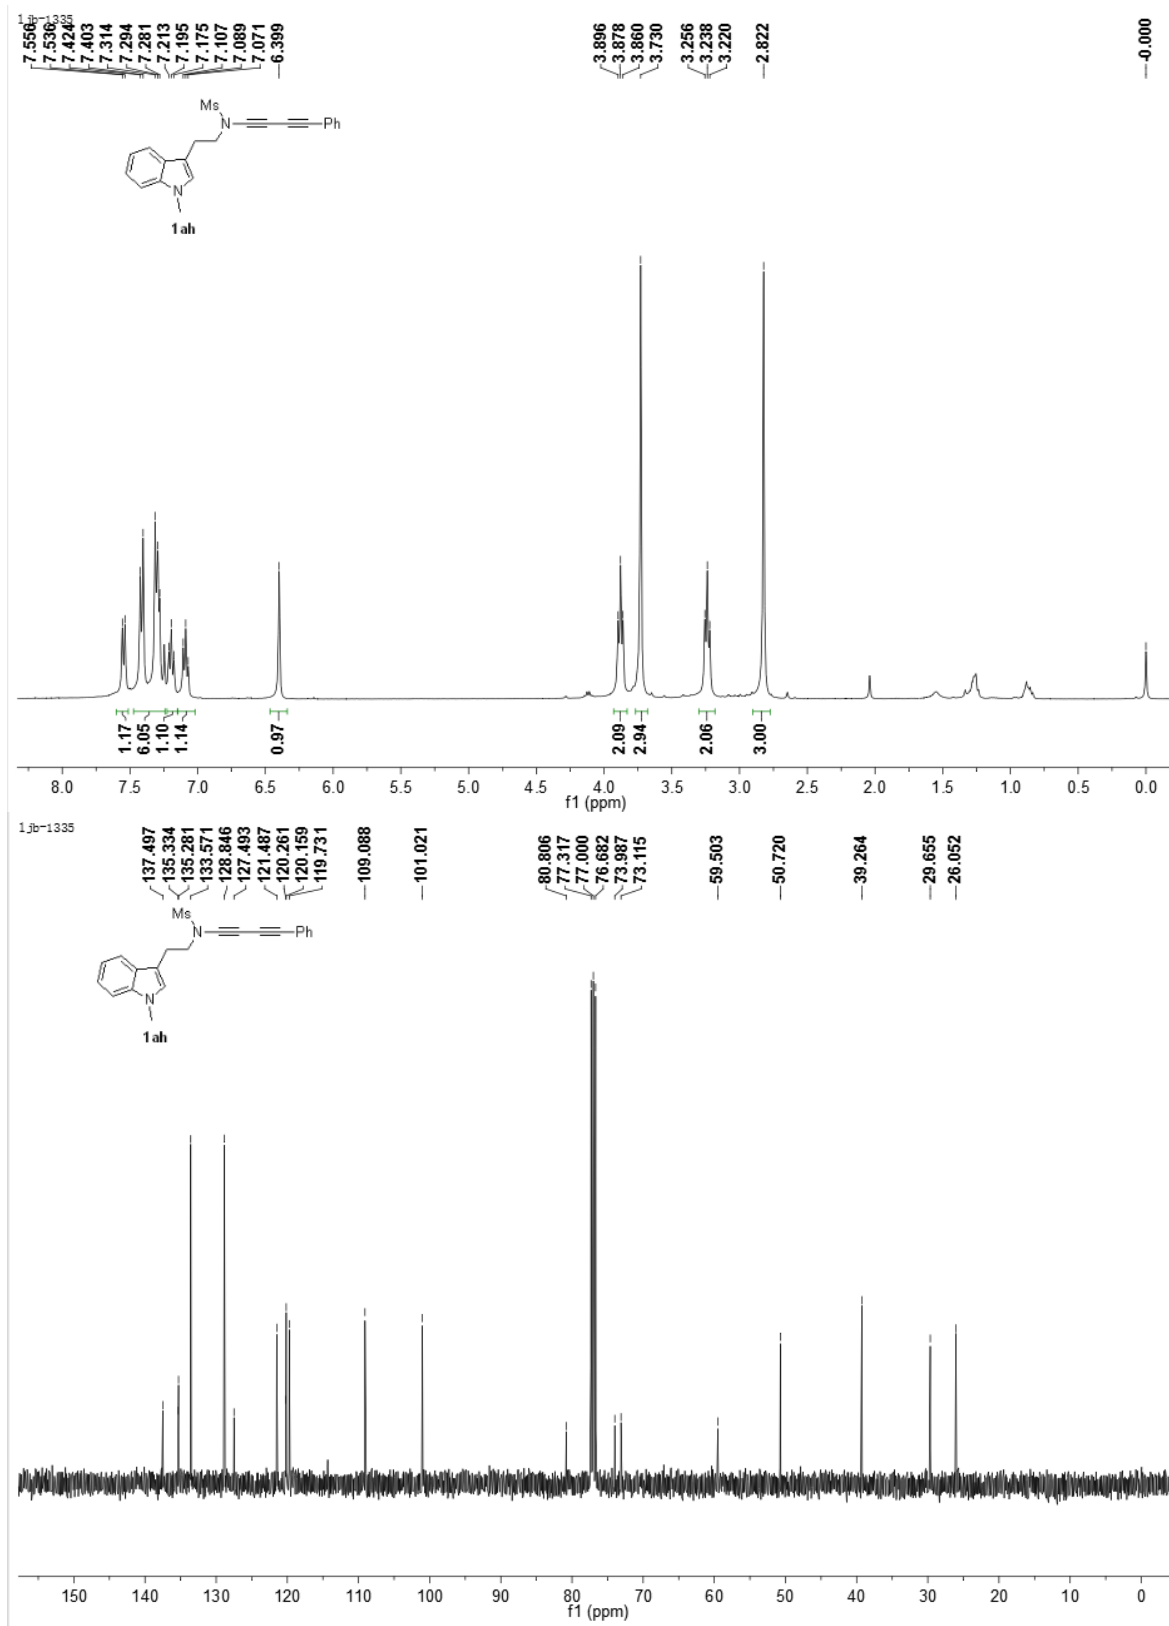

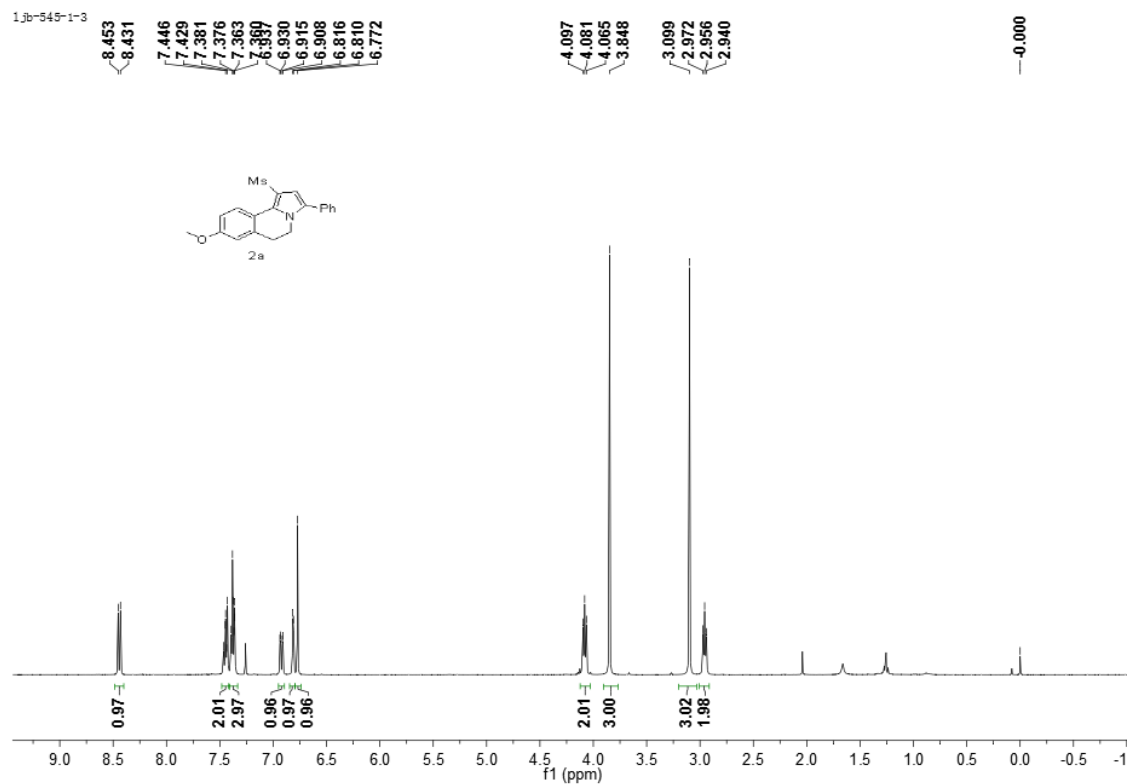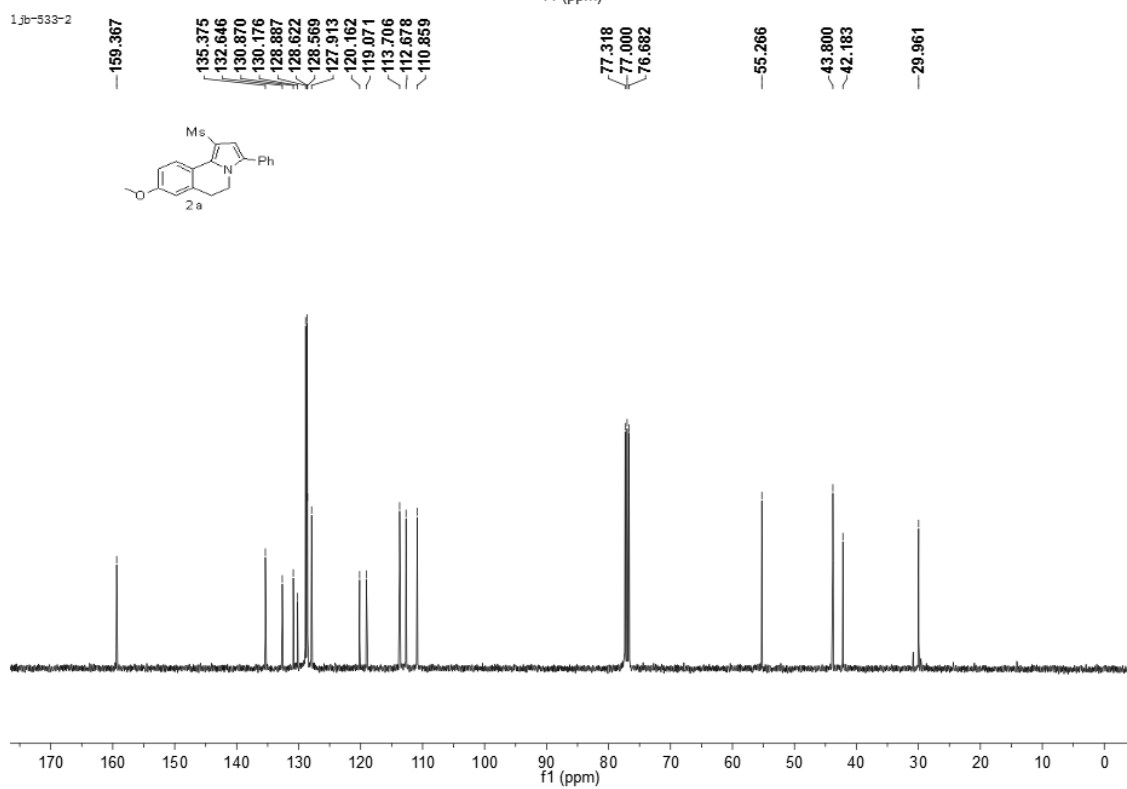

1.jb-723CH

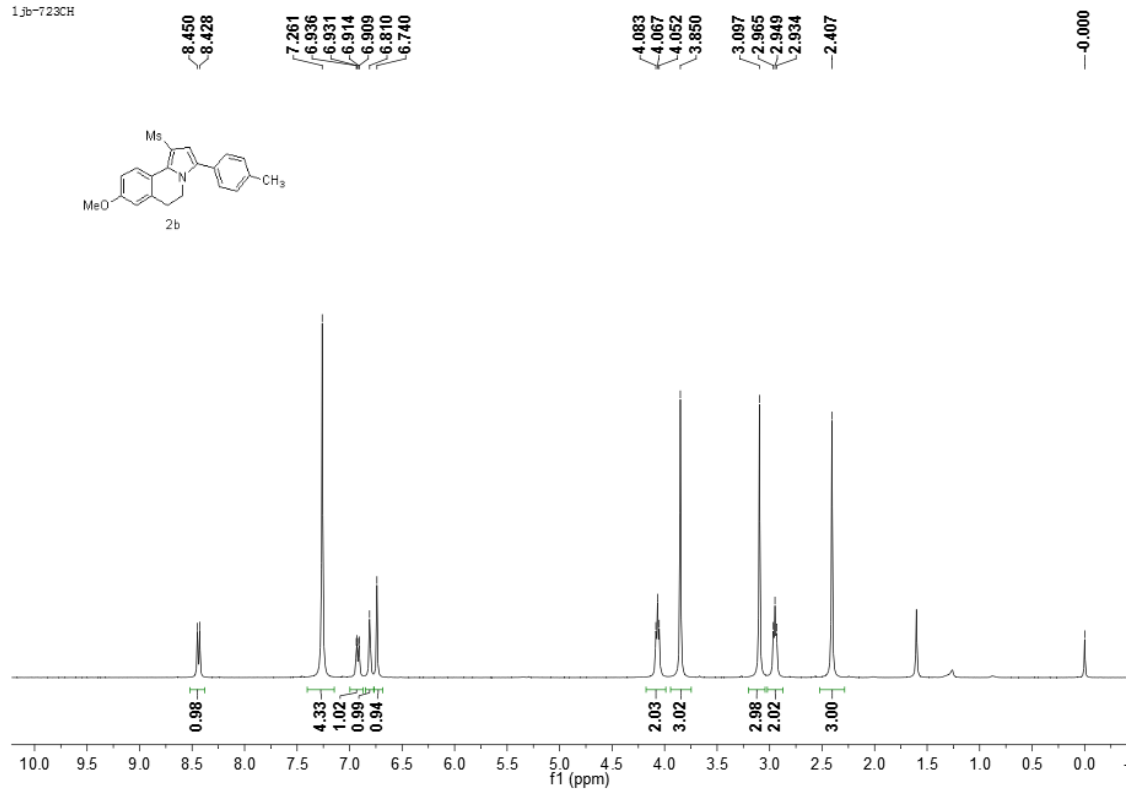

1.jb-723CH

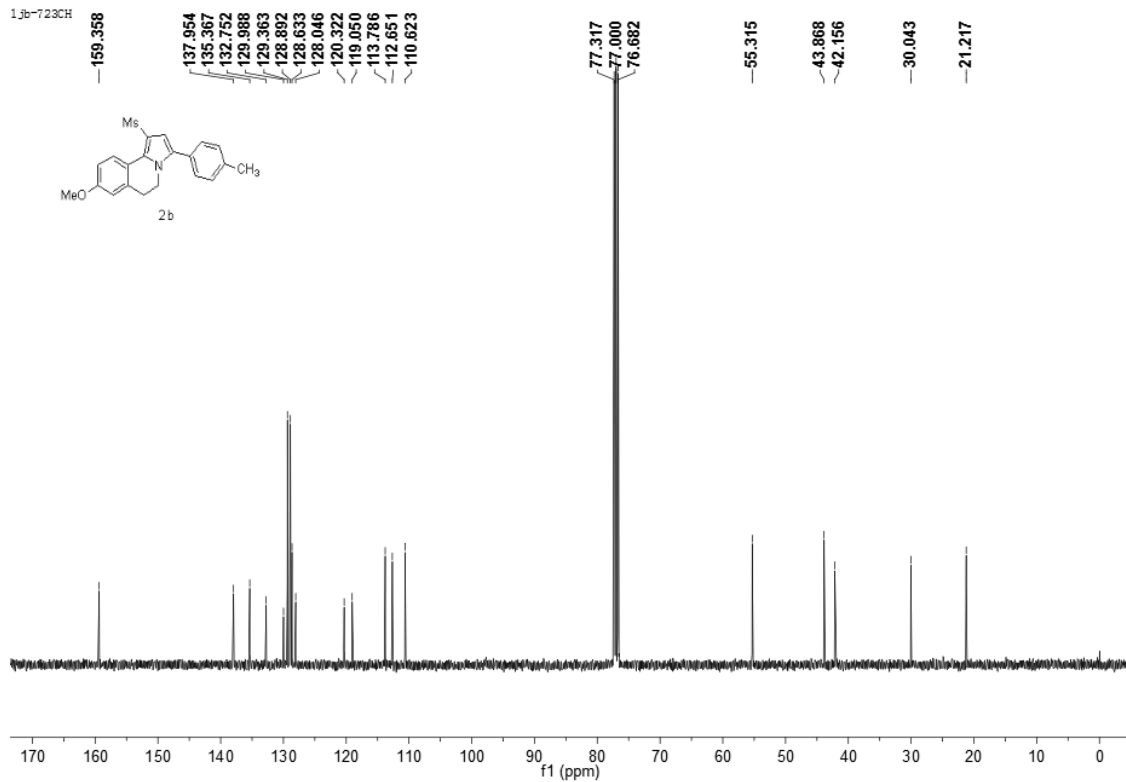

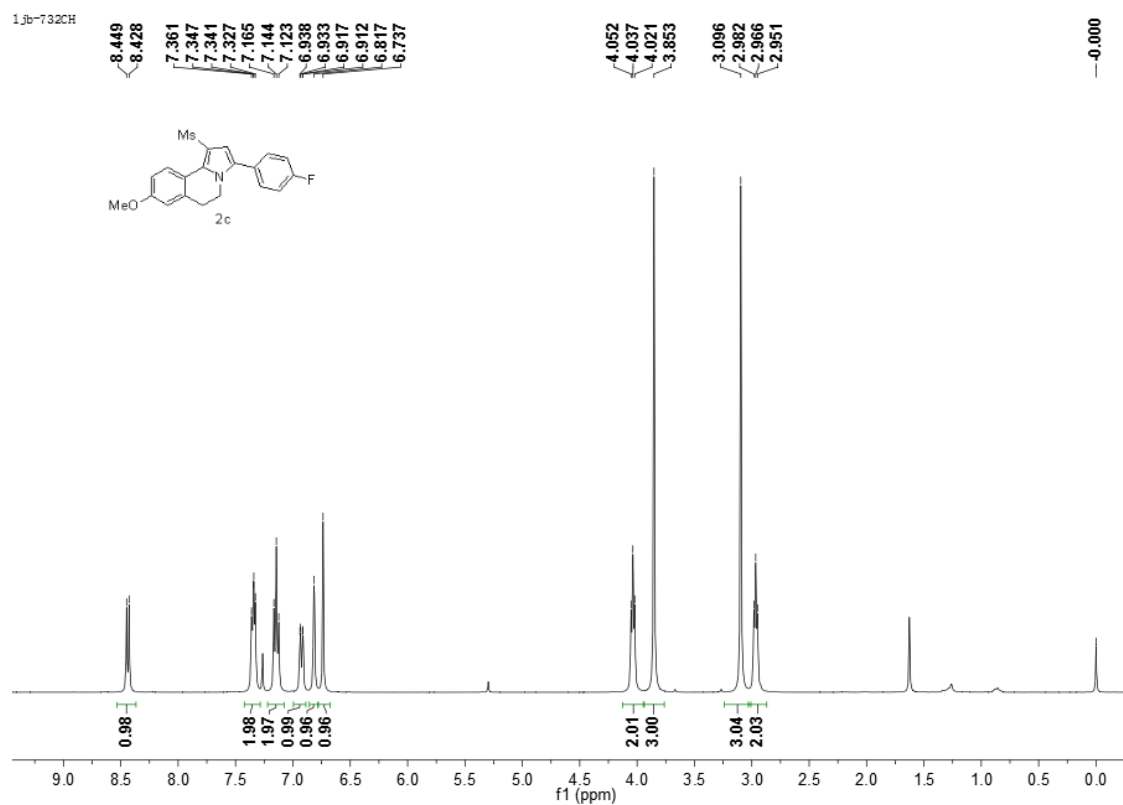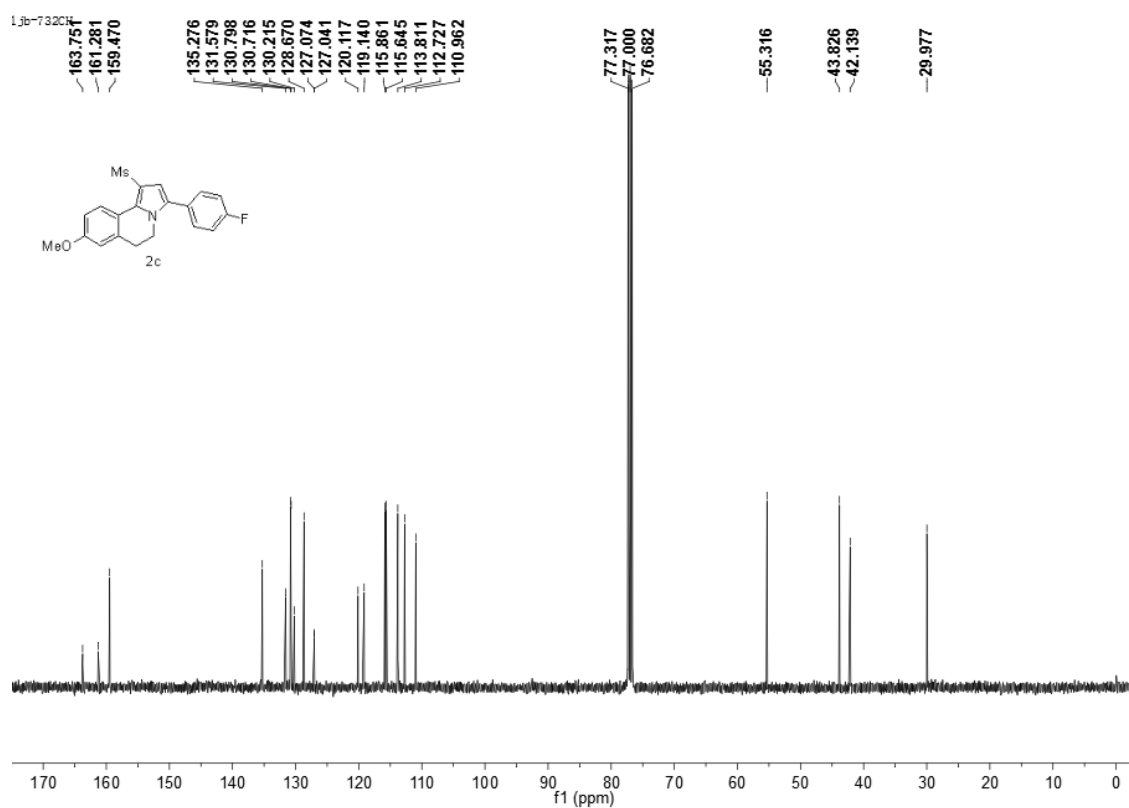

1jb-732

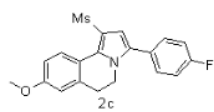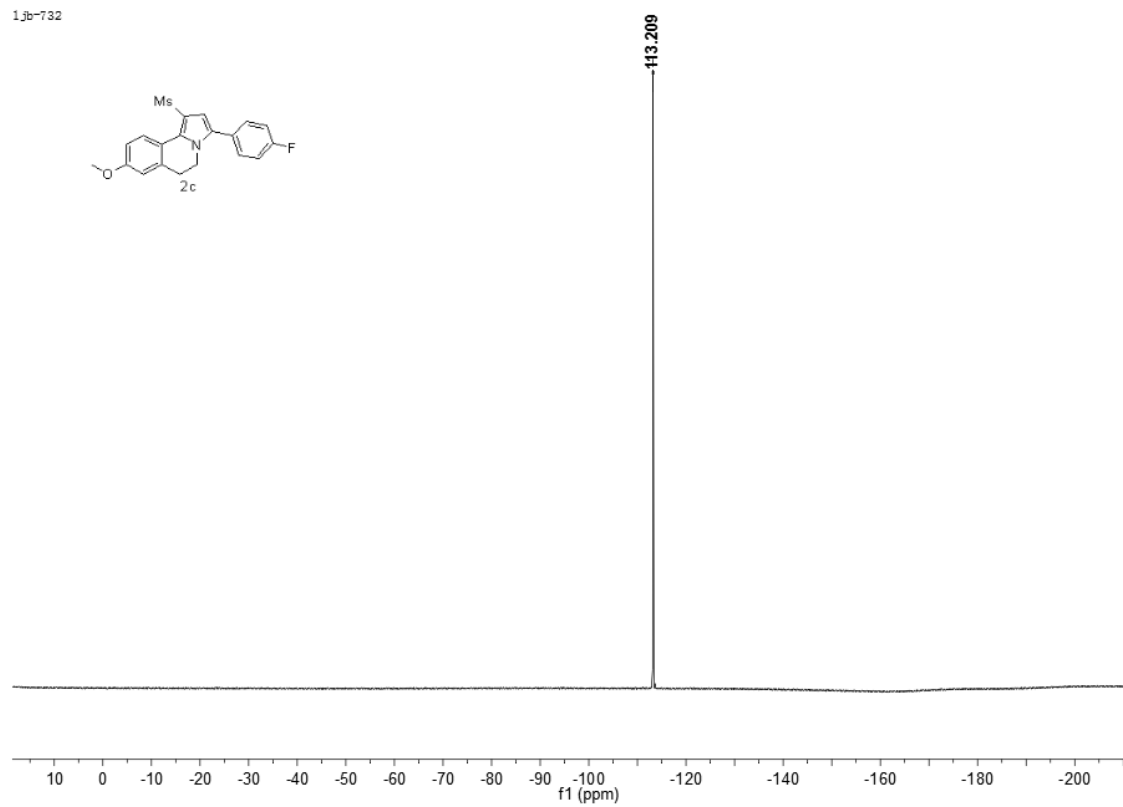

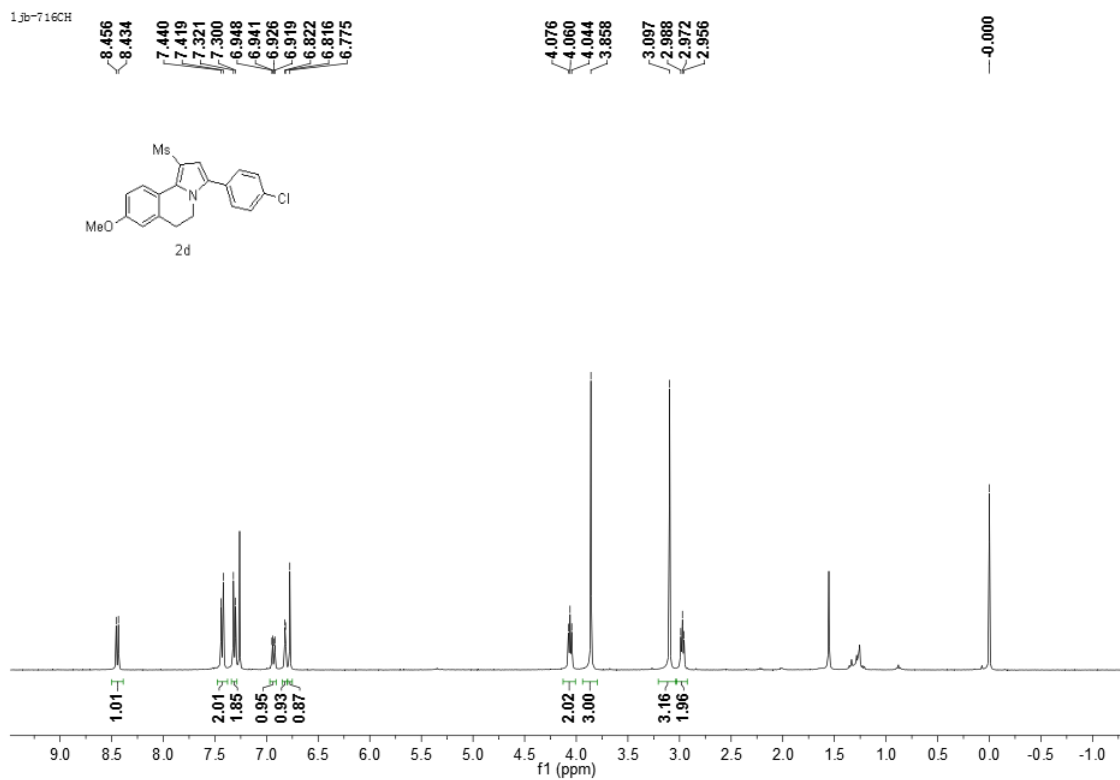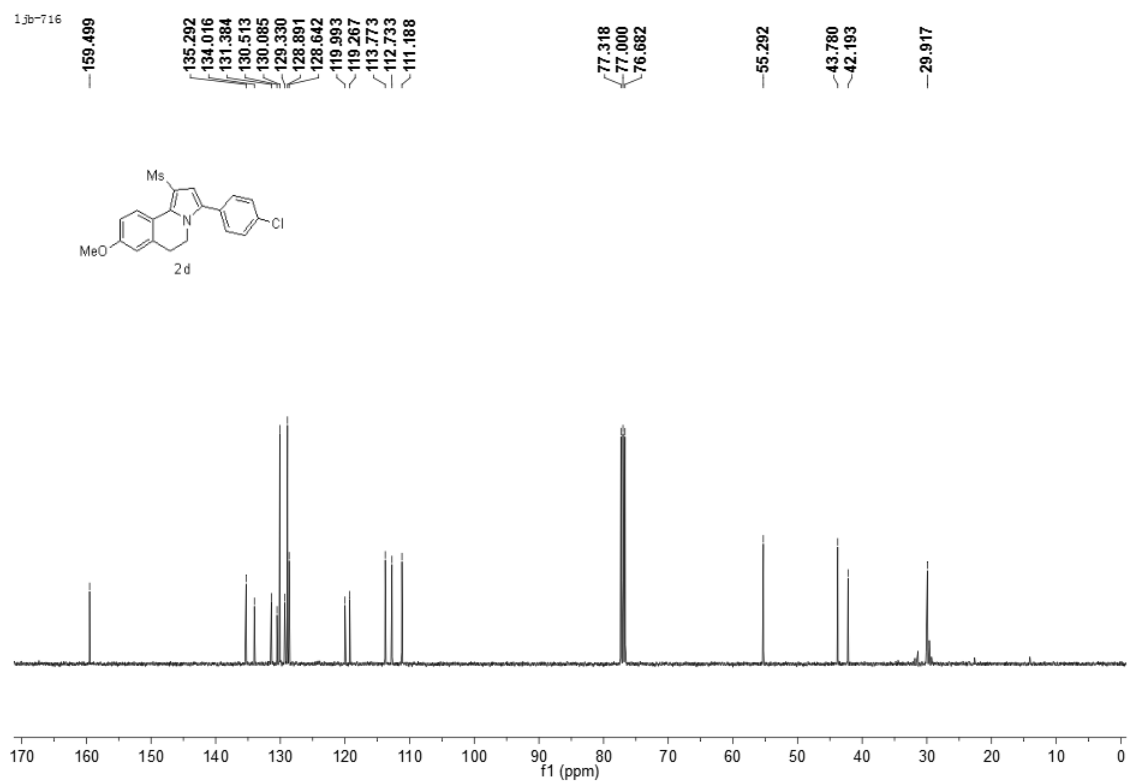



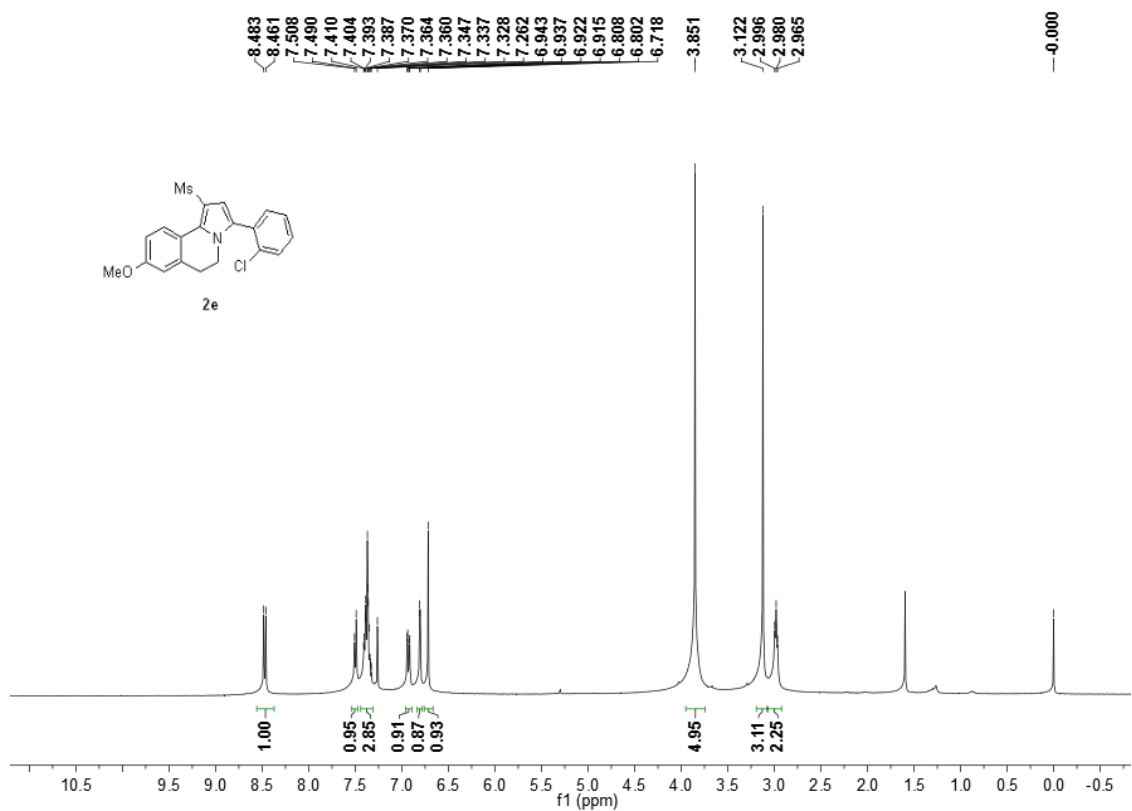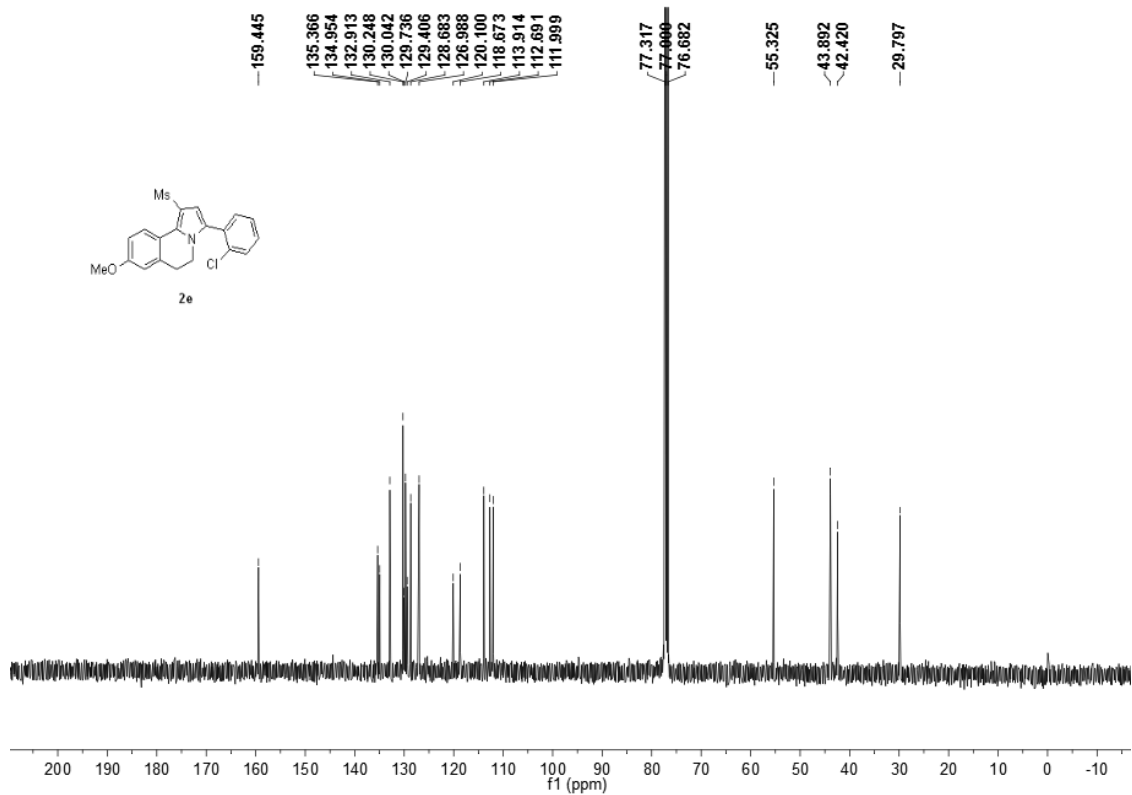

13b-707-3

8.307  
7.476  
7.457  
7.440  
7.407  
7.395  
7.376  
6.783  
6.779  
4.116  
4.100  
4.084  
3.977  
3.932  
3.103  
2.958  
2.942  
2.925  
-0.000

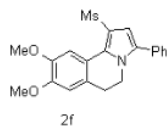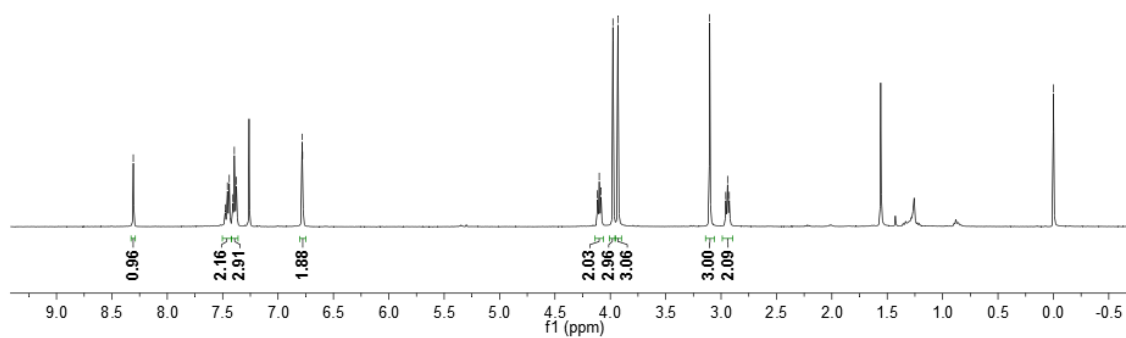

13b-707-3C

148.695  
148.327  
132.737  
130.910  
130.204  
128.966  
128.659  
127.987  
126.164  
120.010  
119.219  
111.081  
110.838  
110.396  
77.318  
77.000  
76.682  
56.221  
55.934  
43.999  
42.482  
29.184  
-0.048

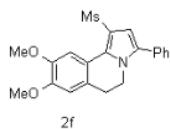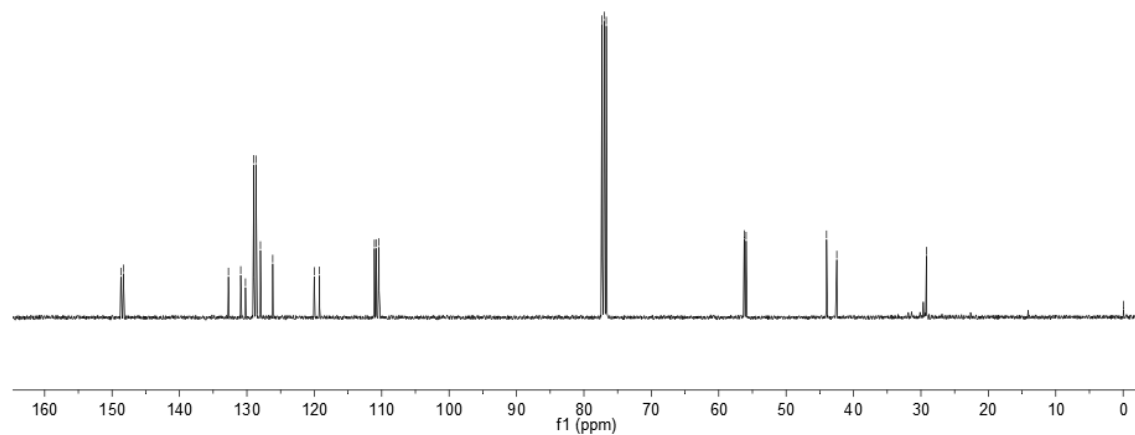

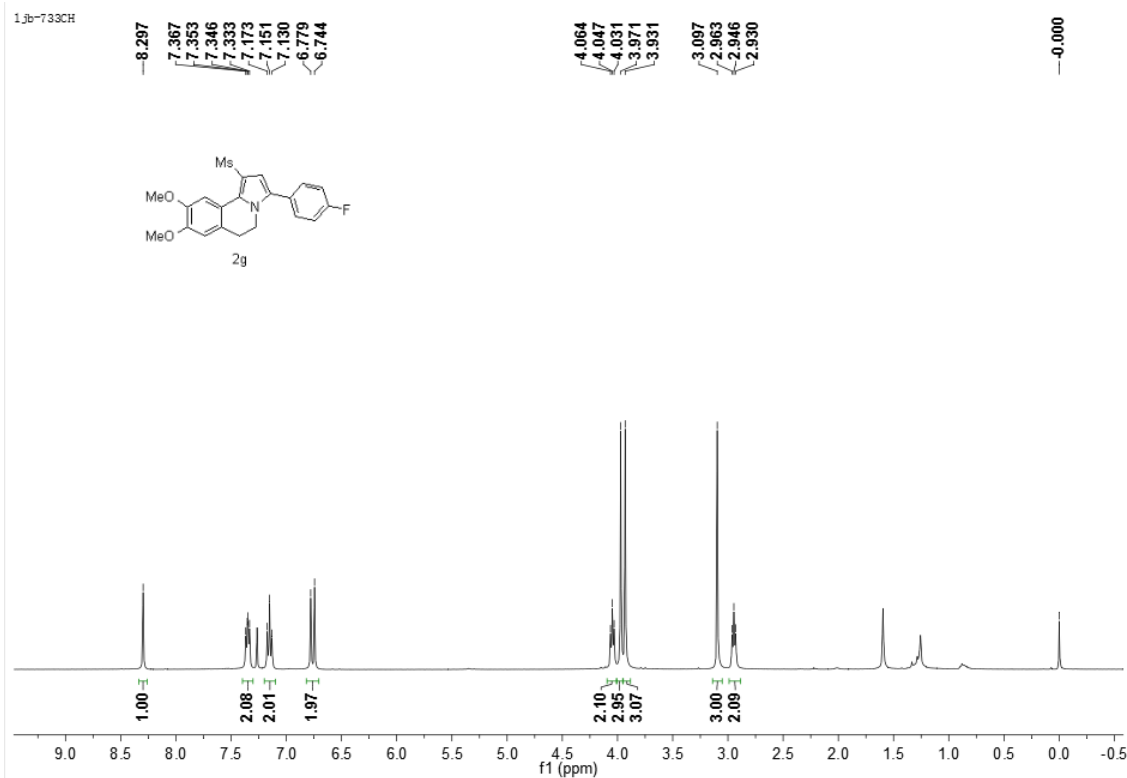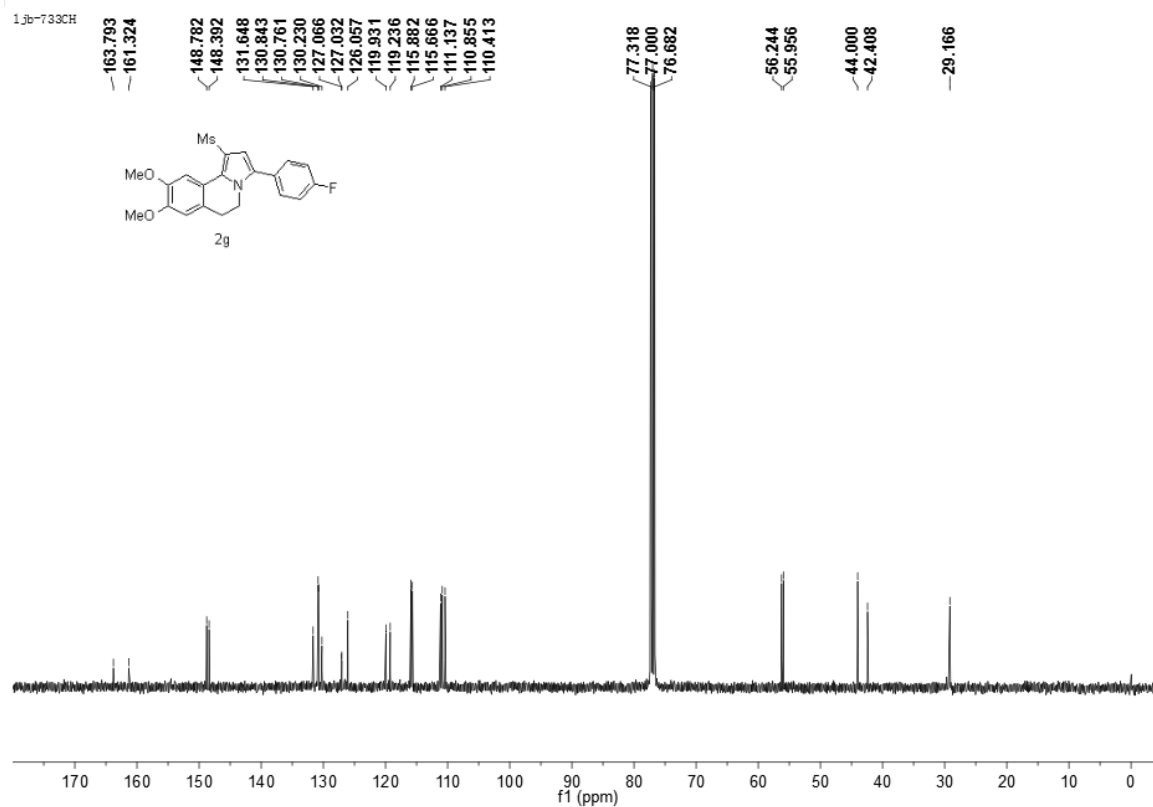

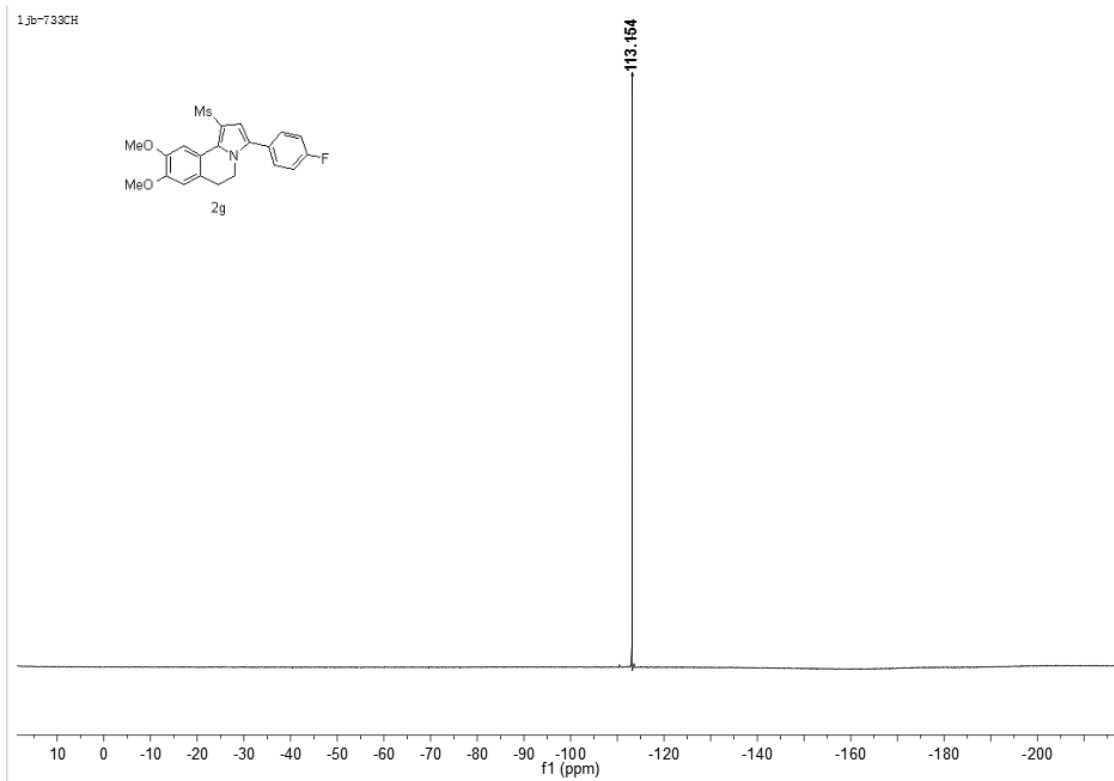

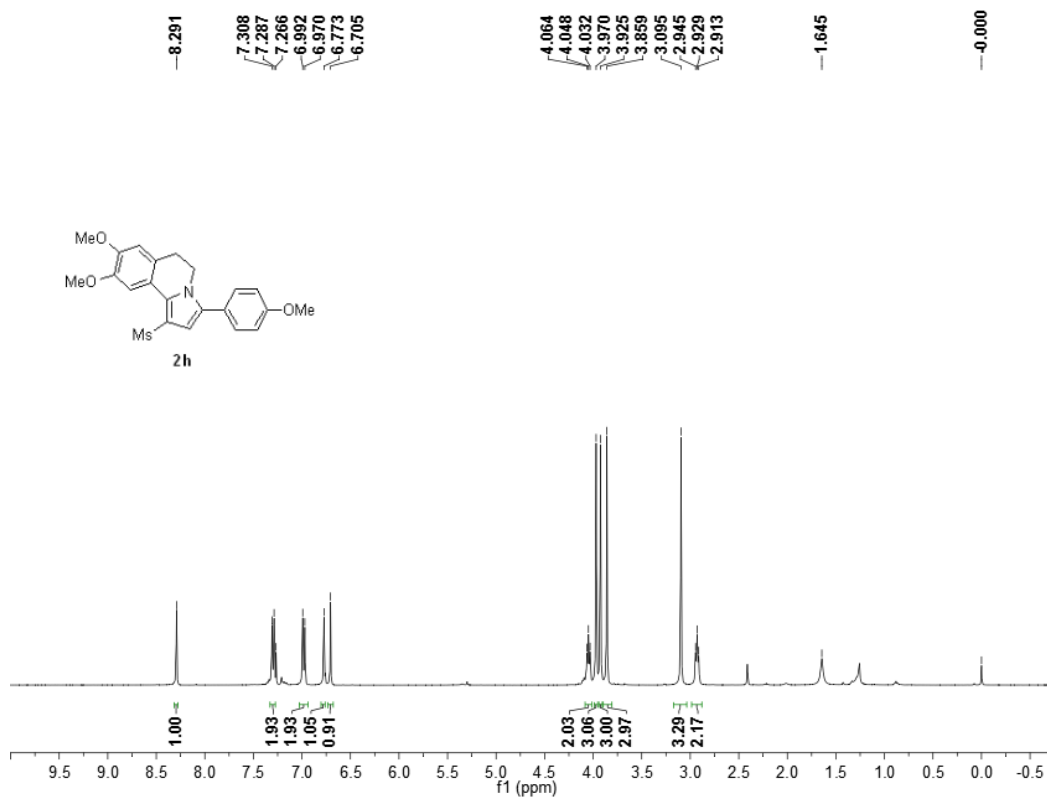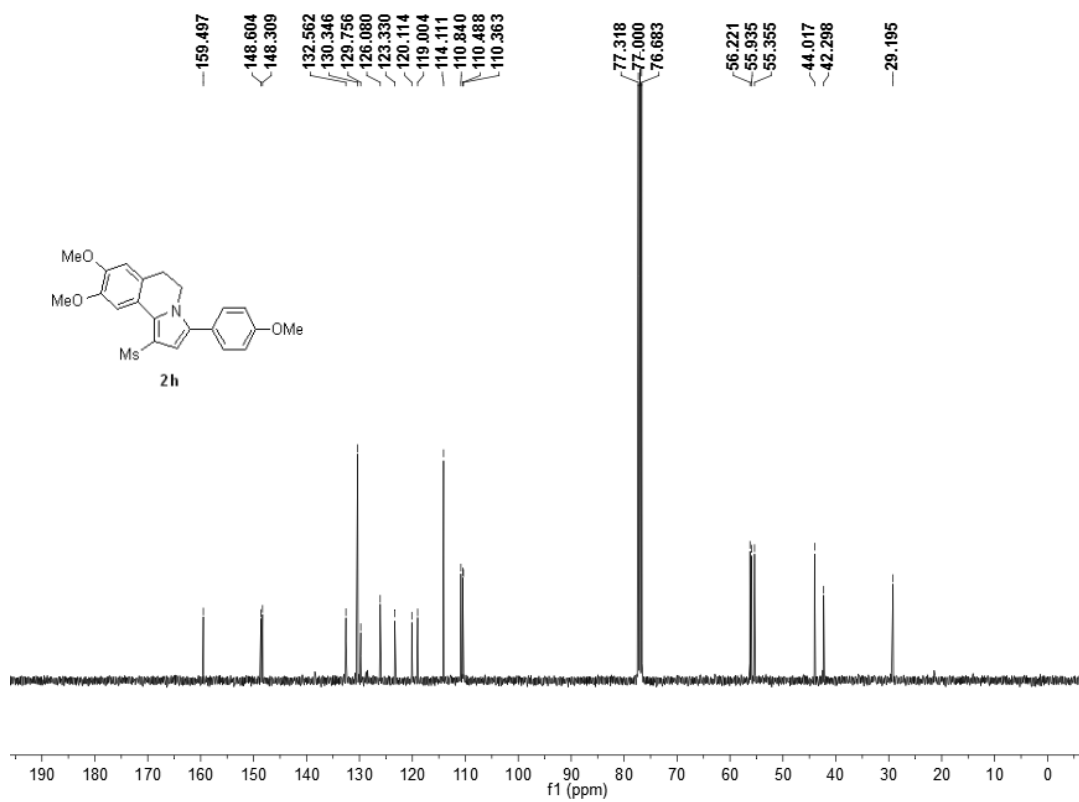

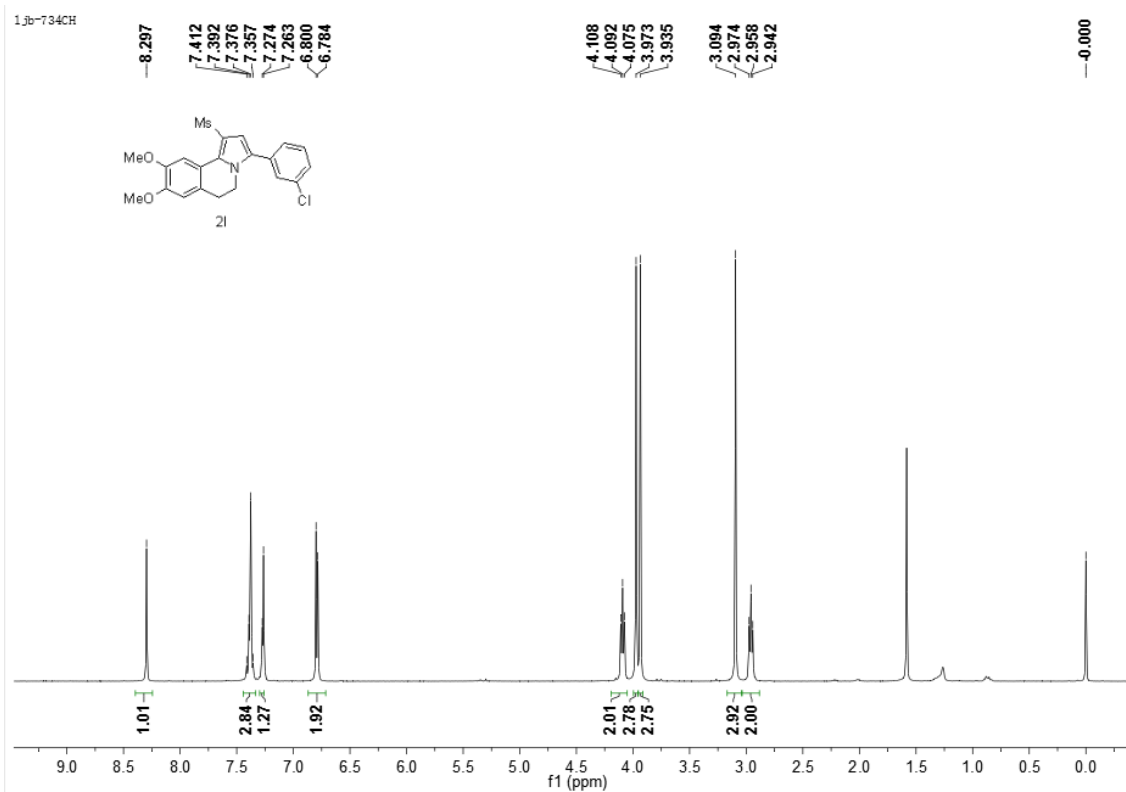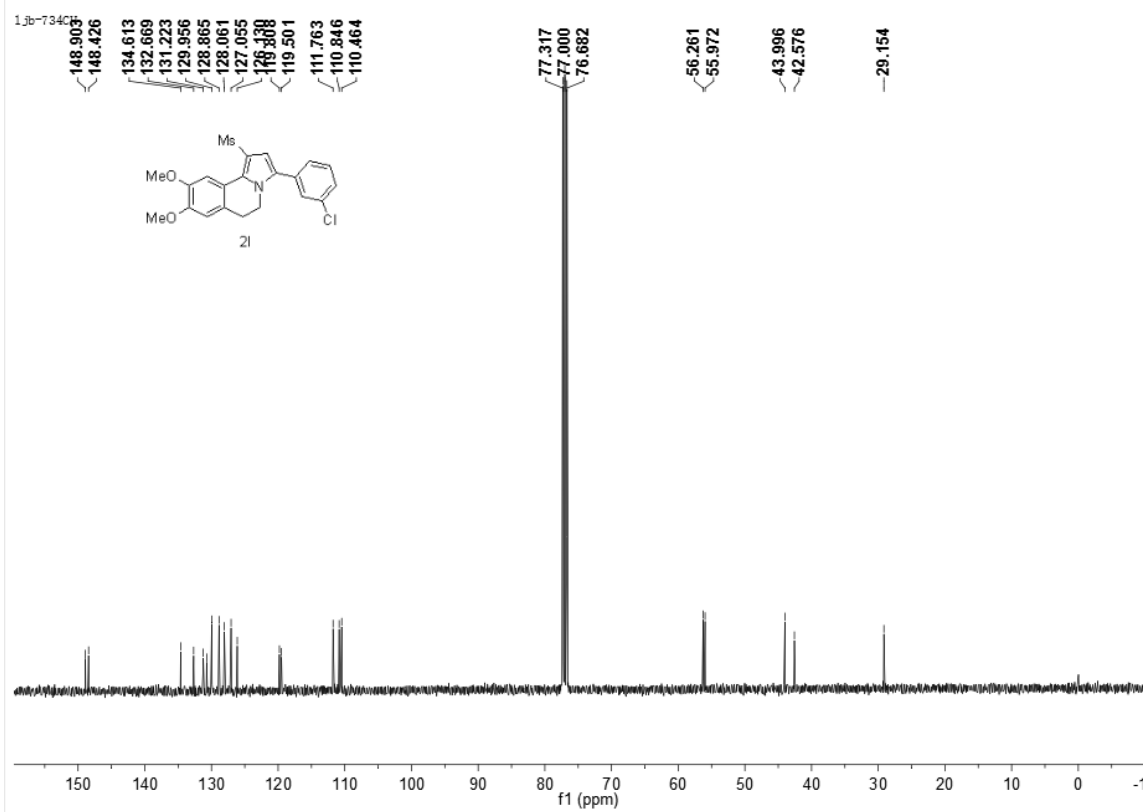

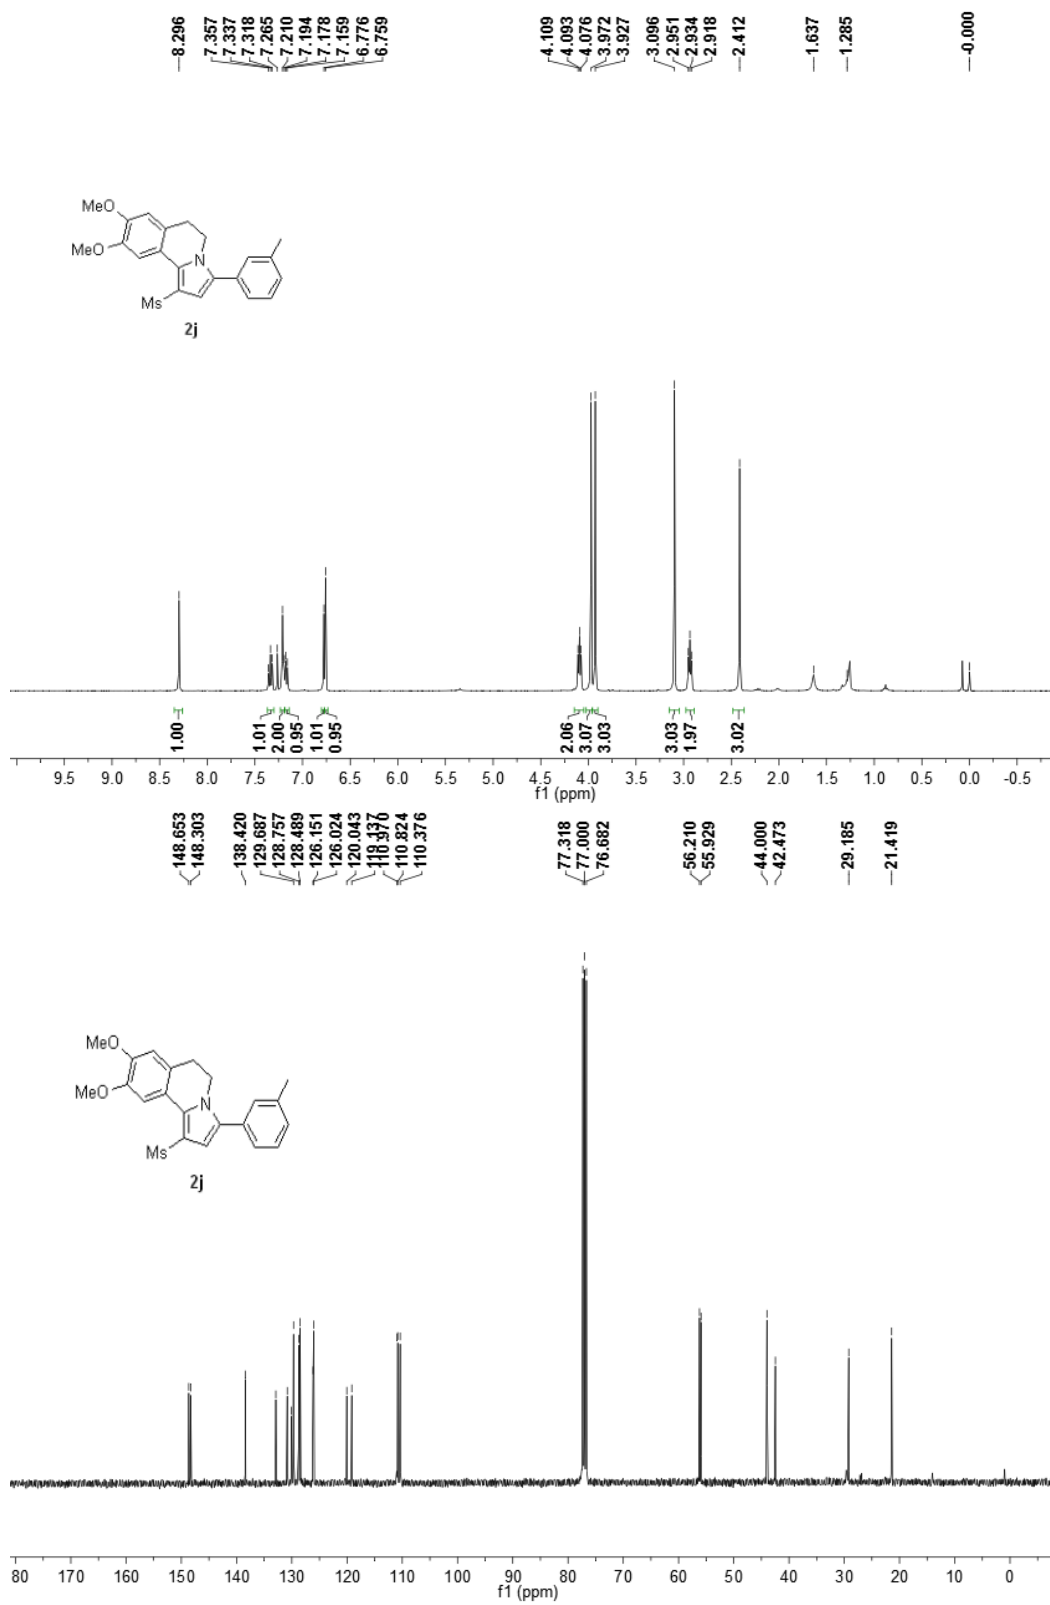

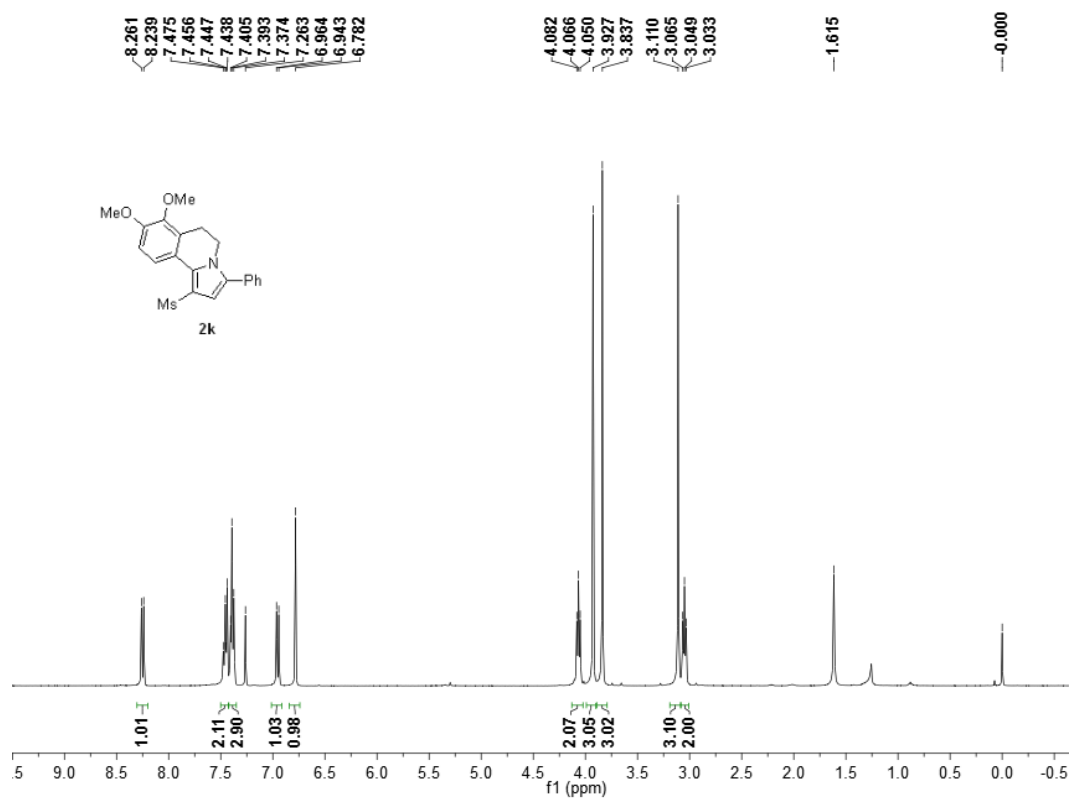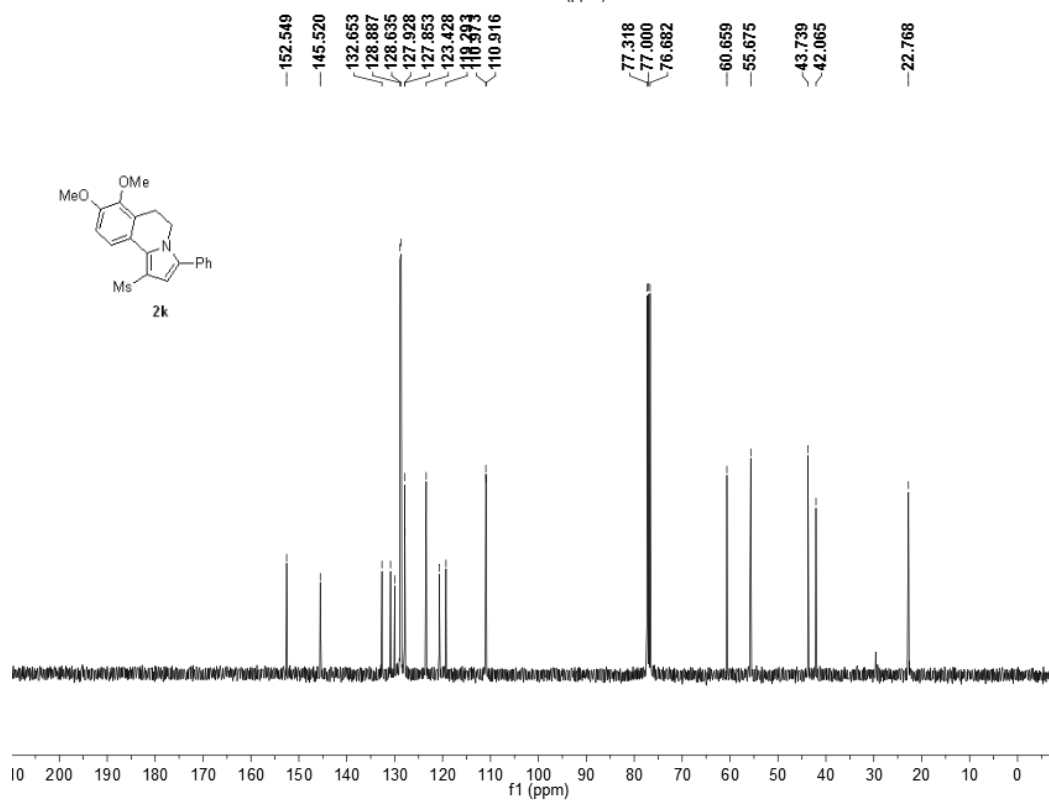



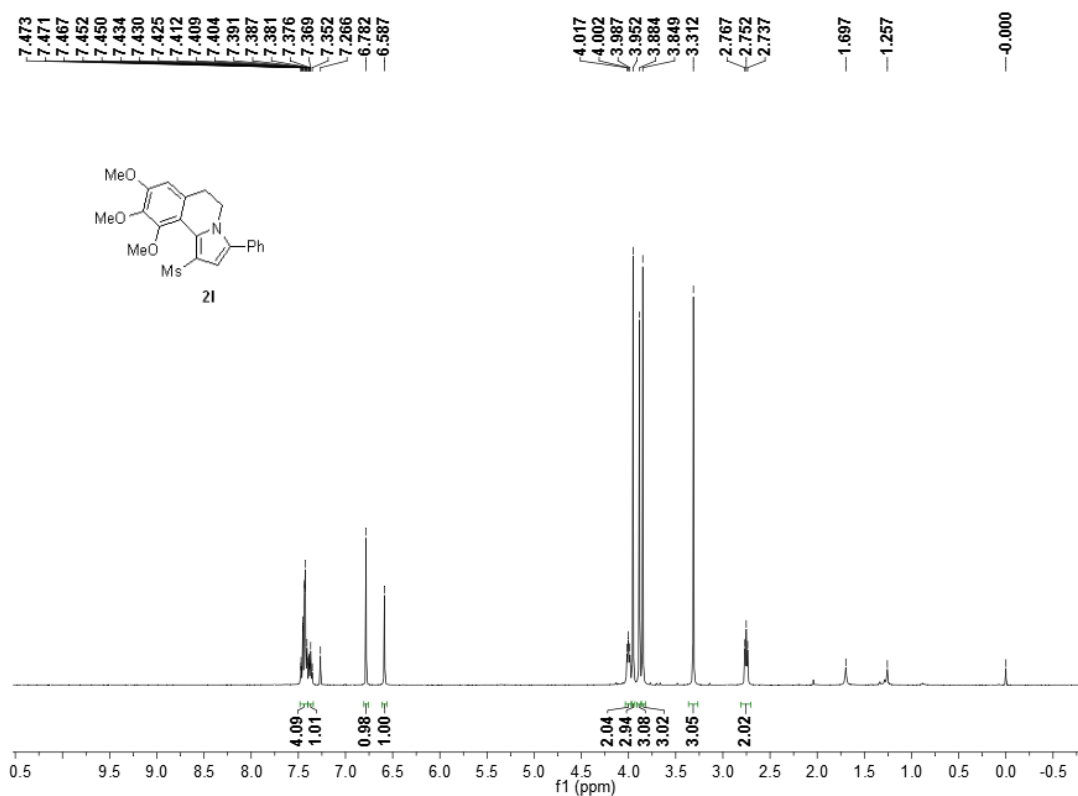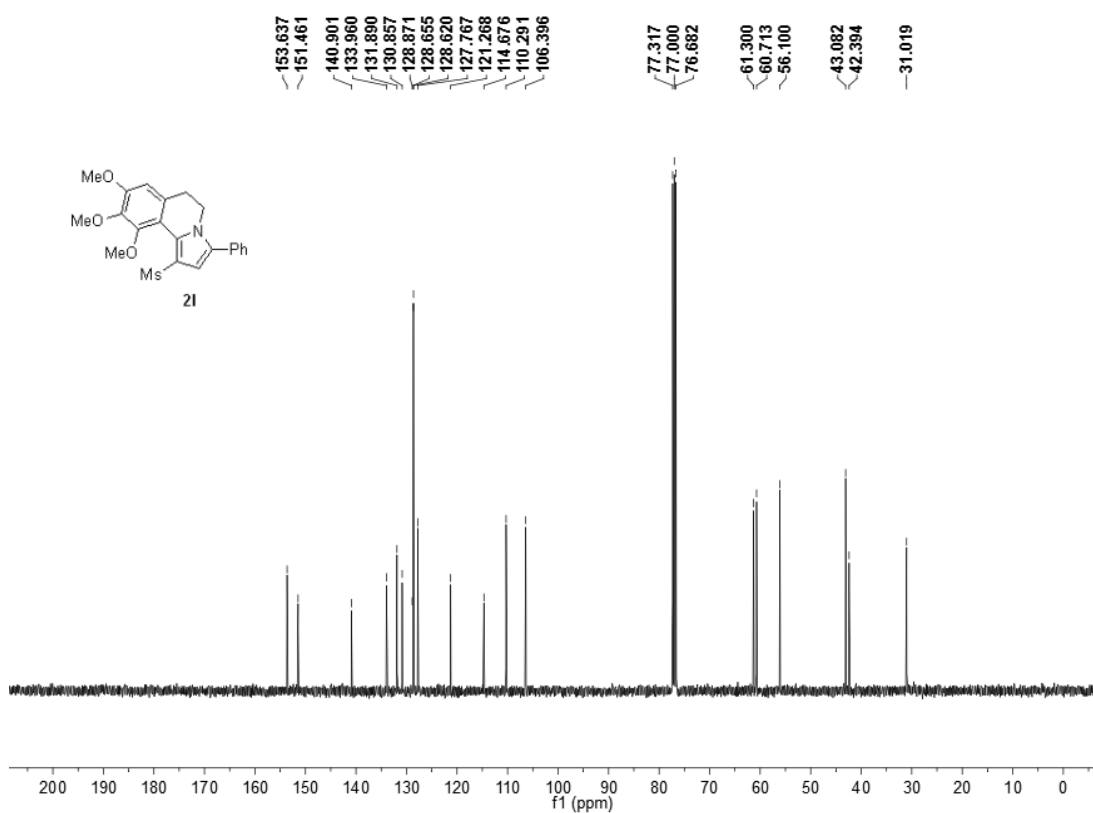

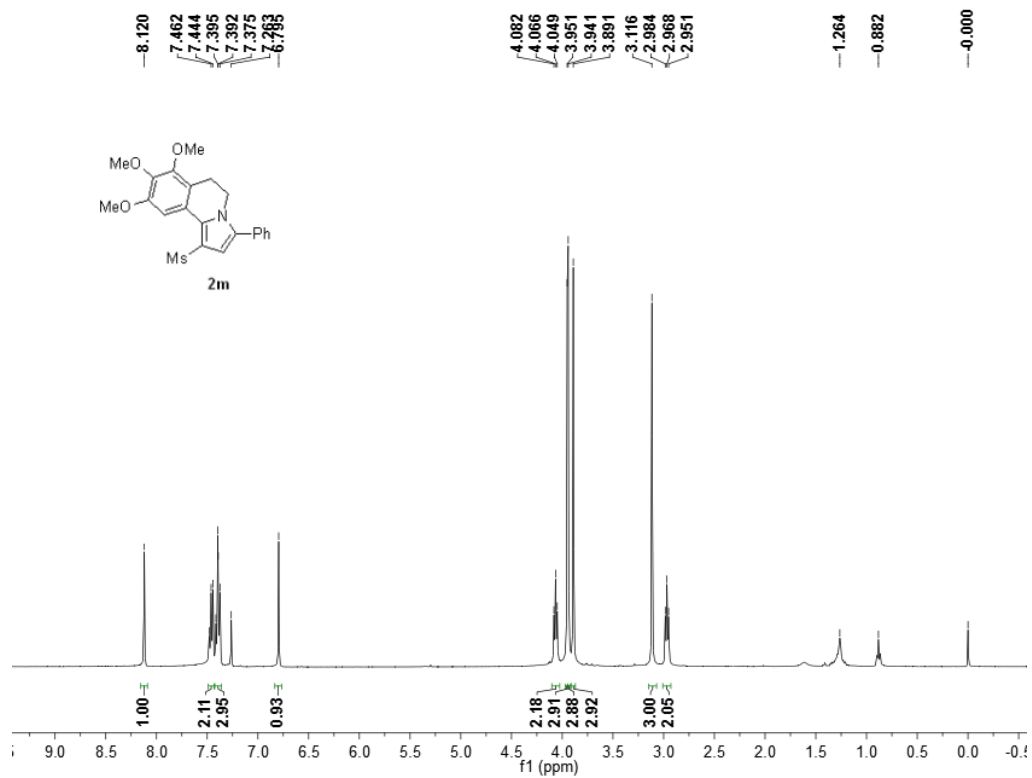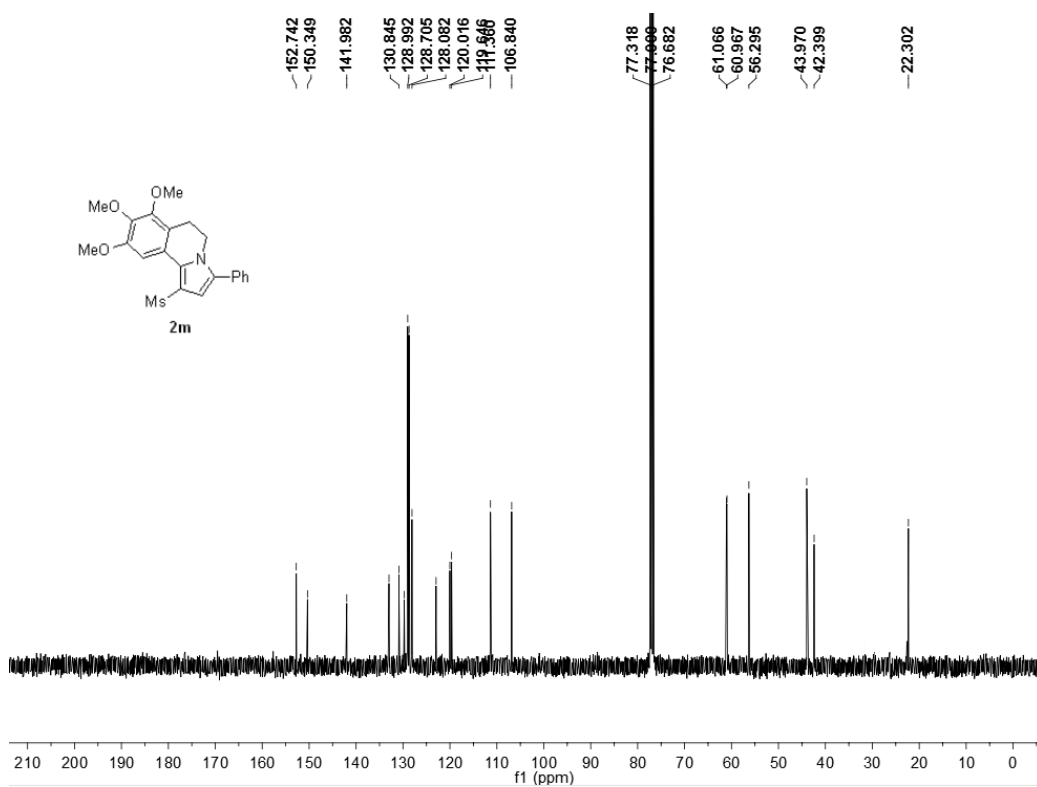

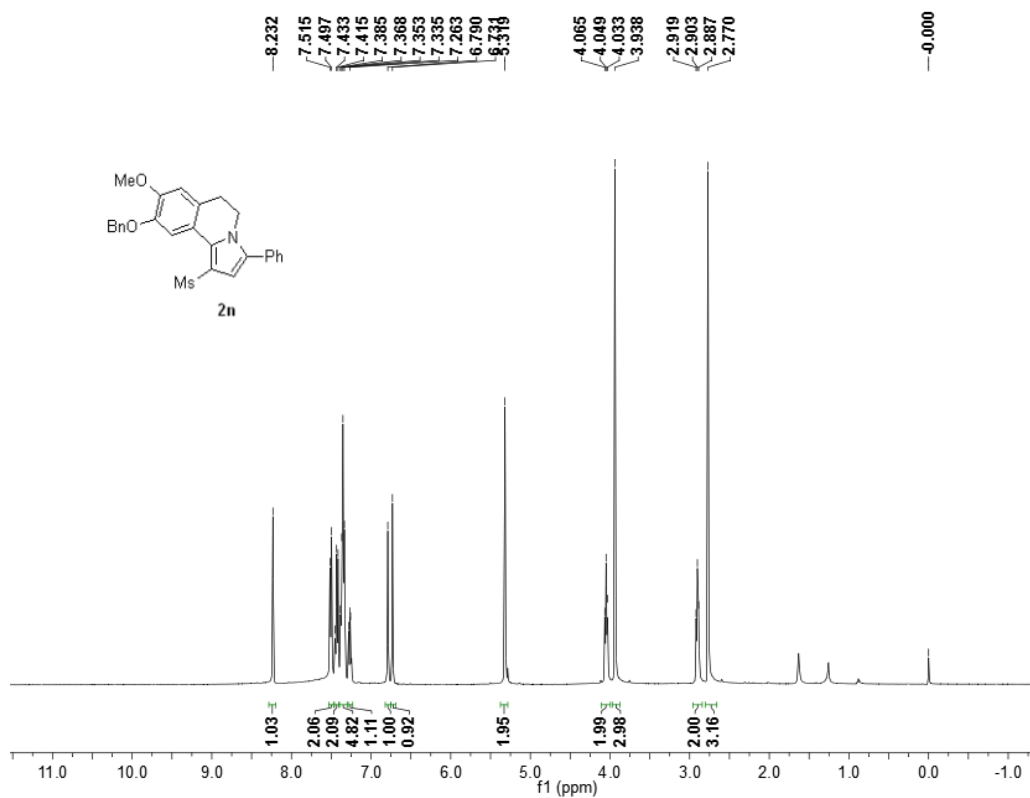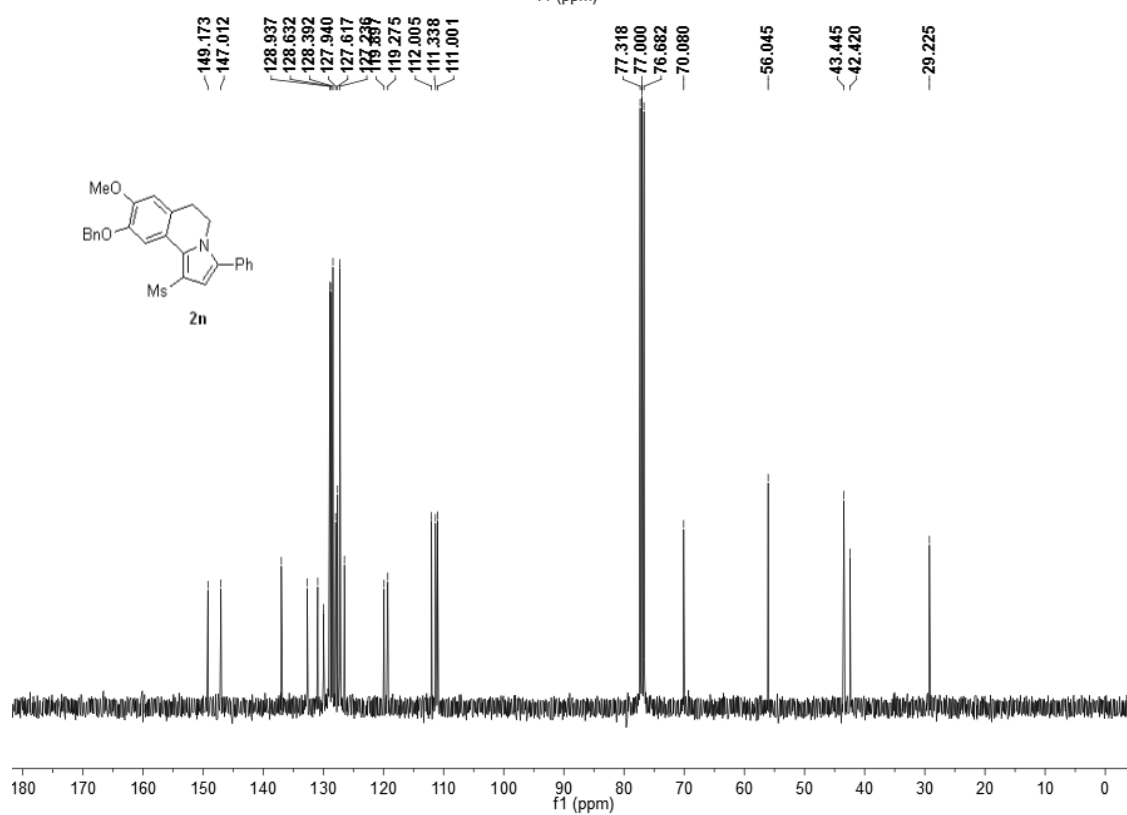

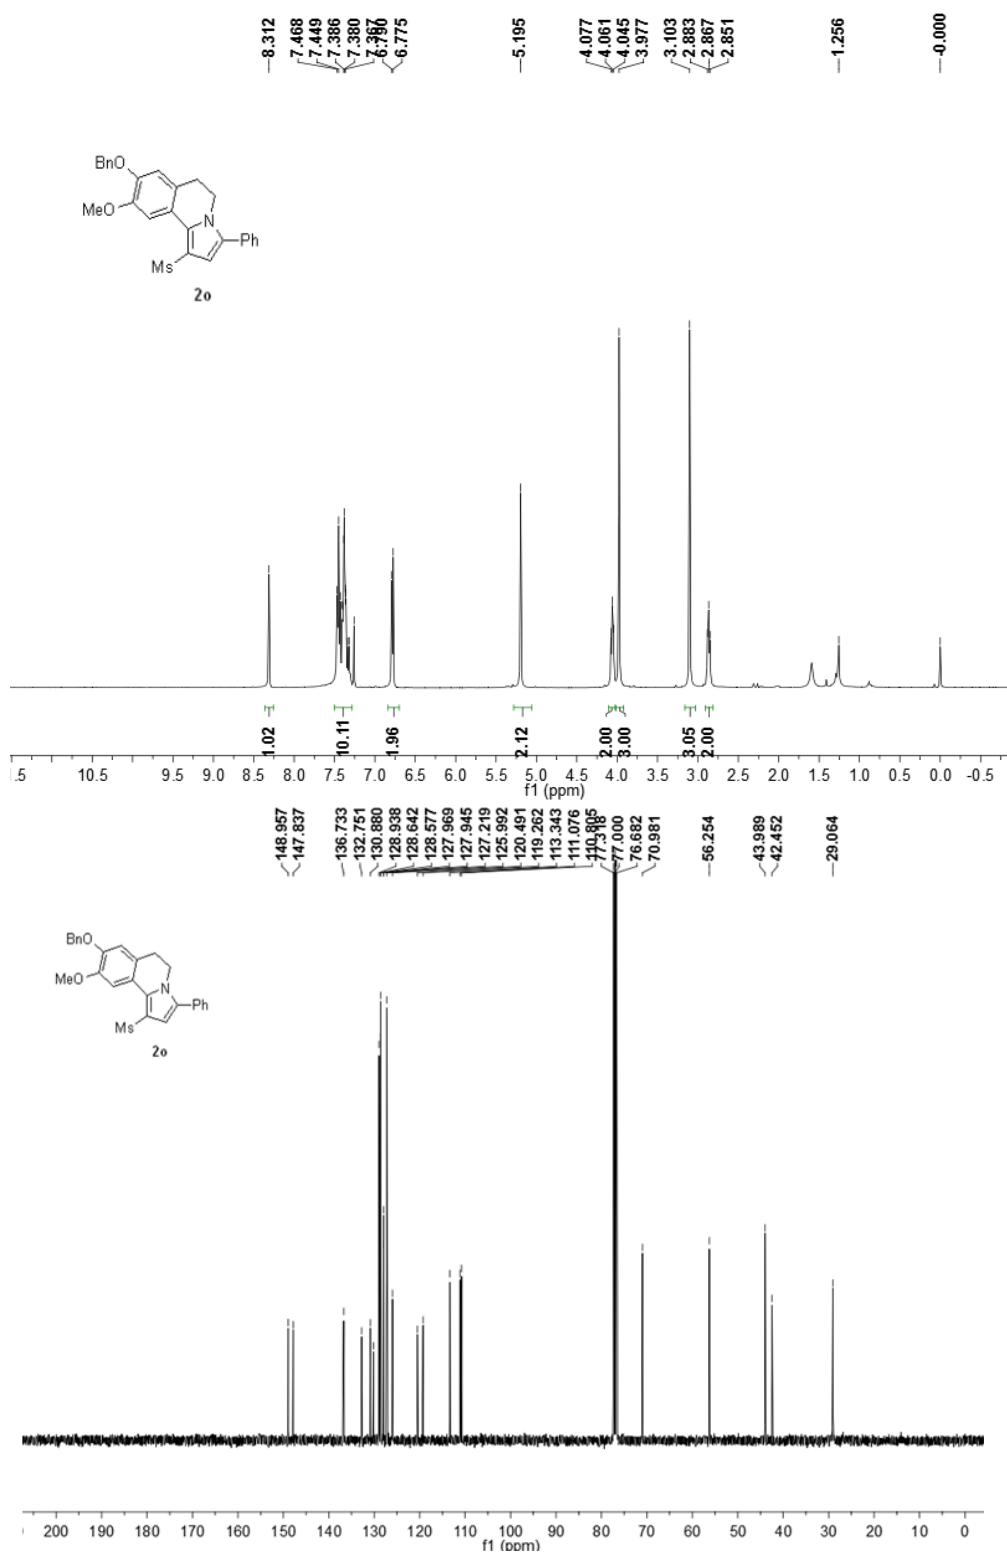

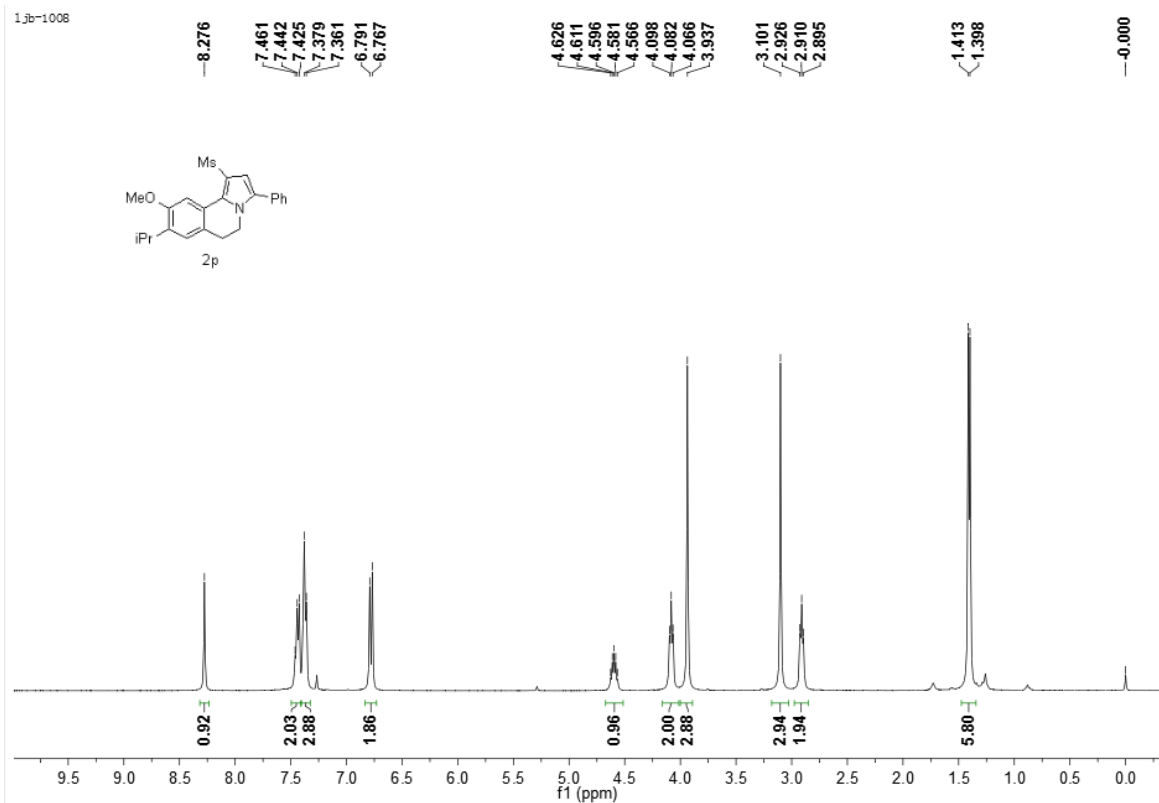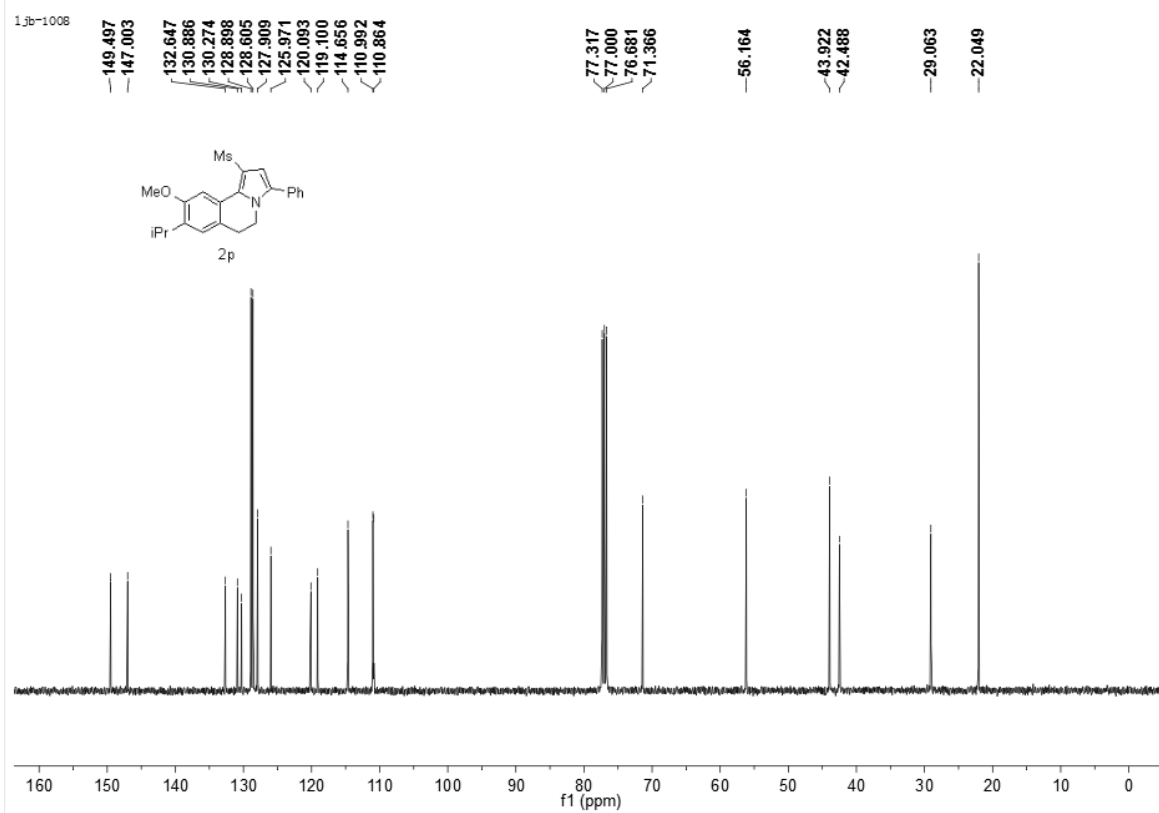

PC-8-5-2

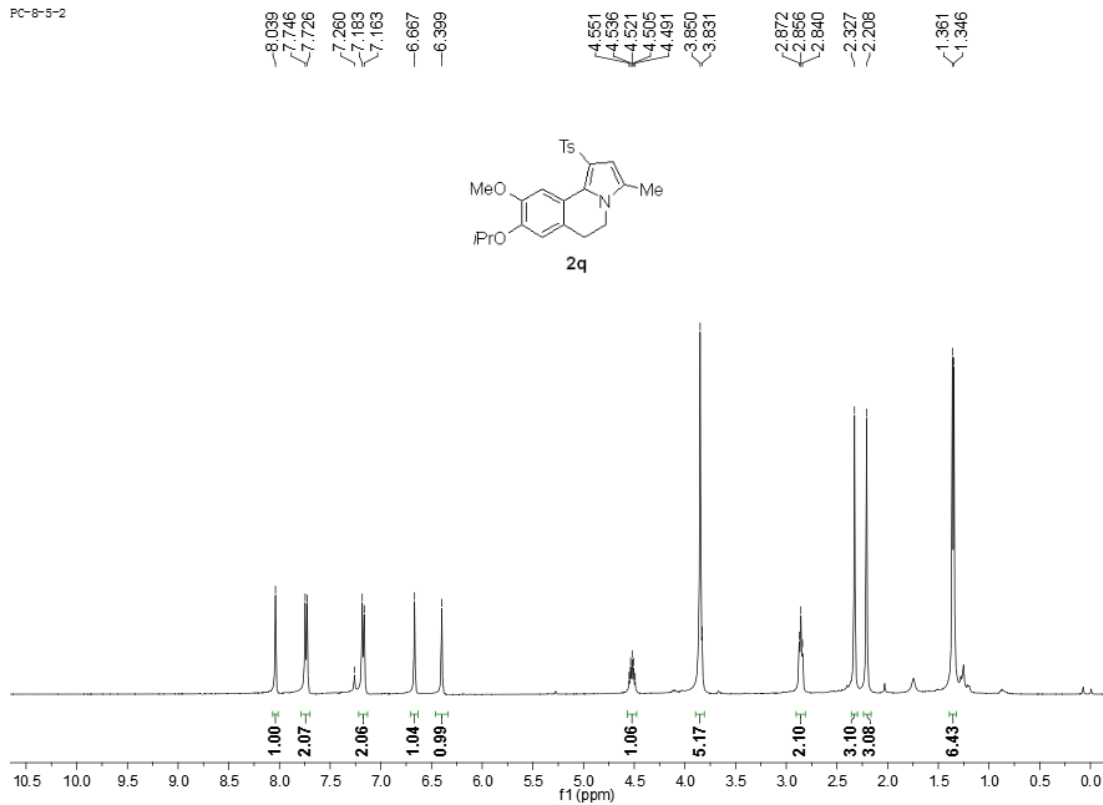

PC-8-5-2

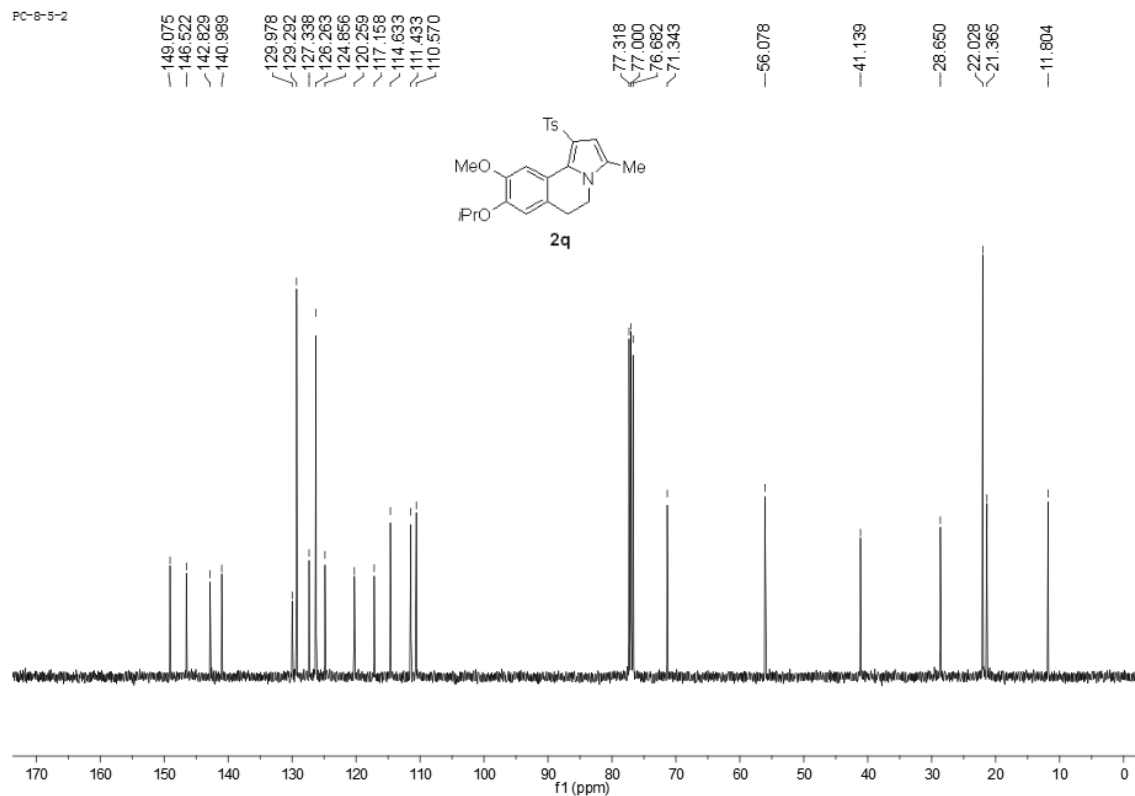

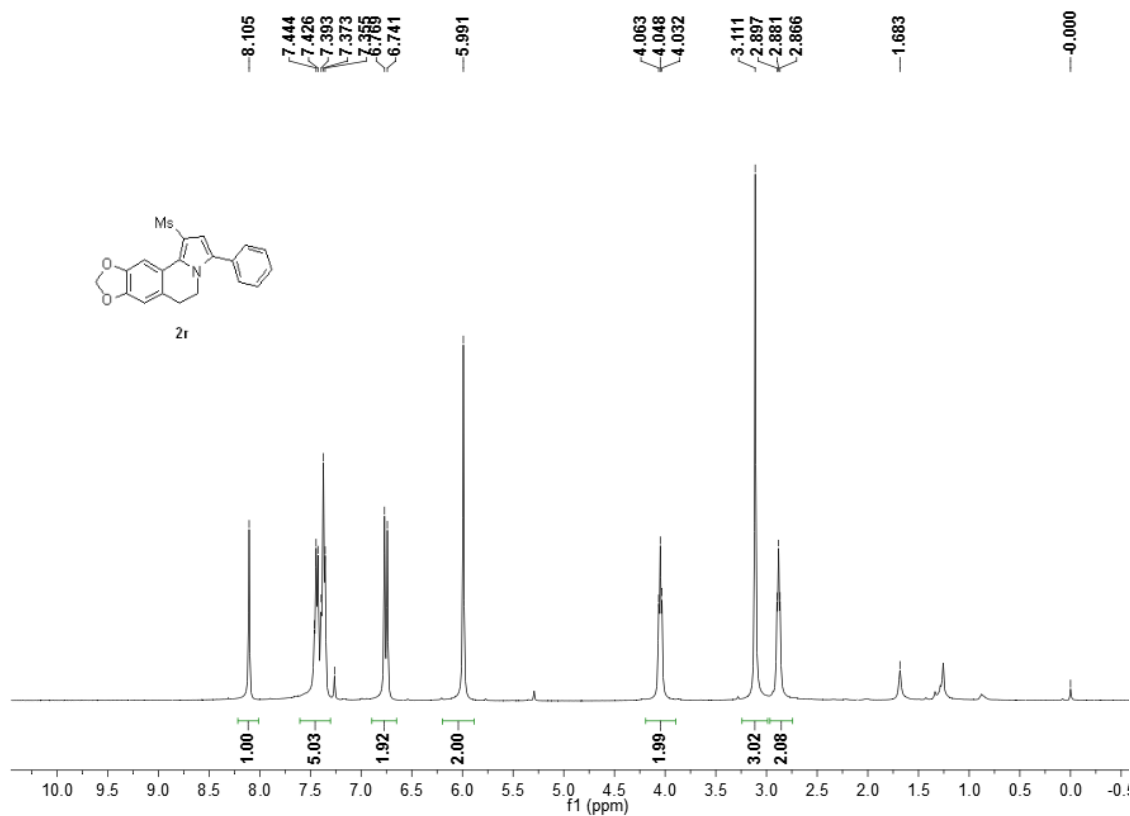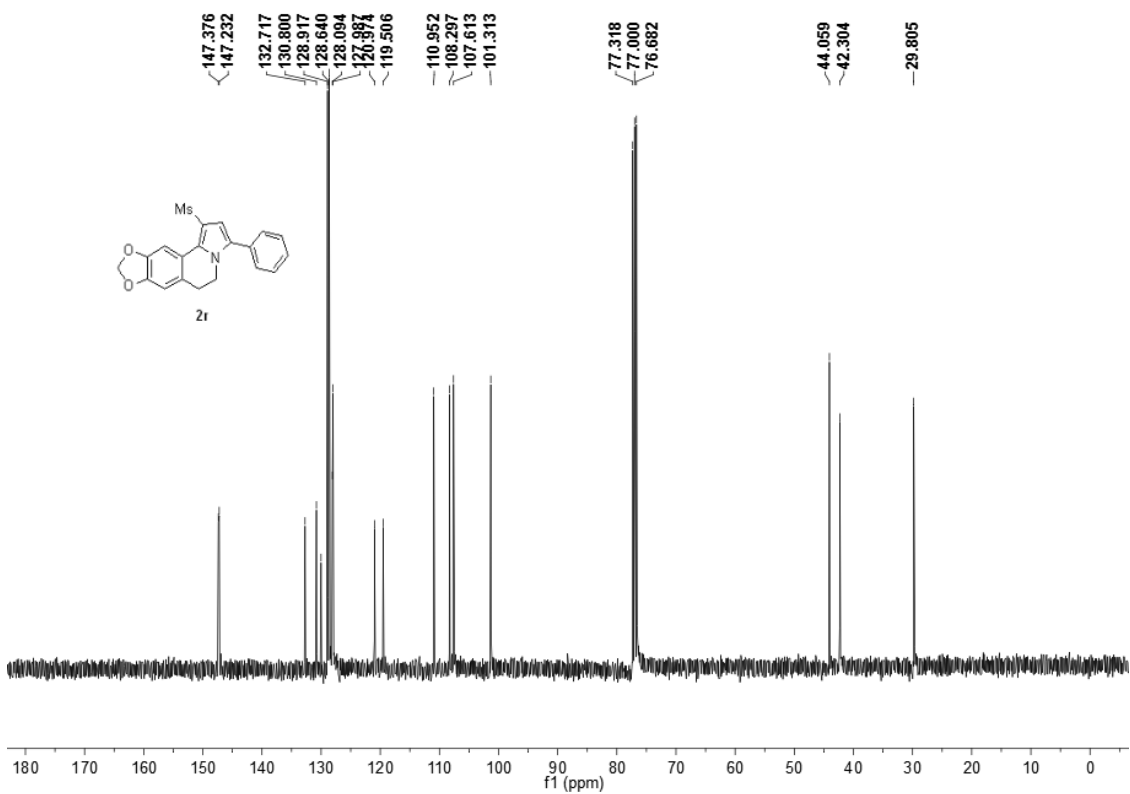

1j6-633CH

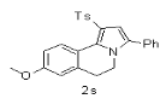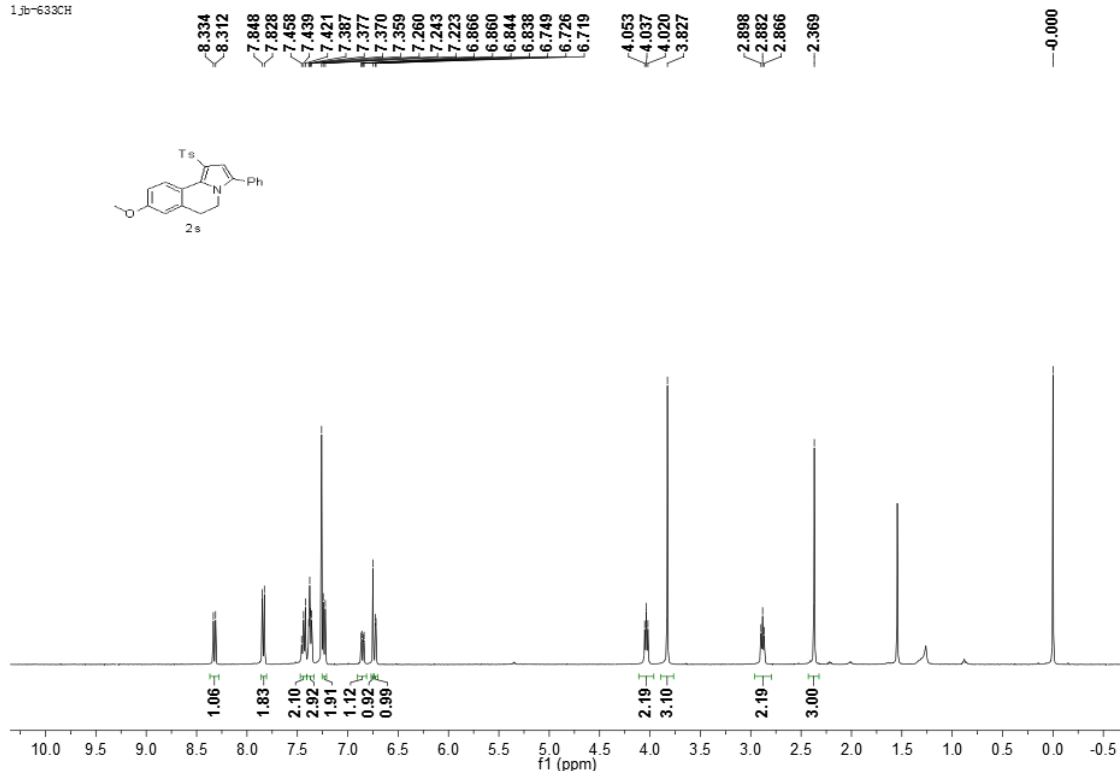

1j6-633-3

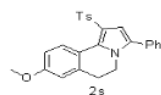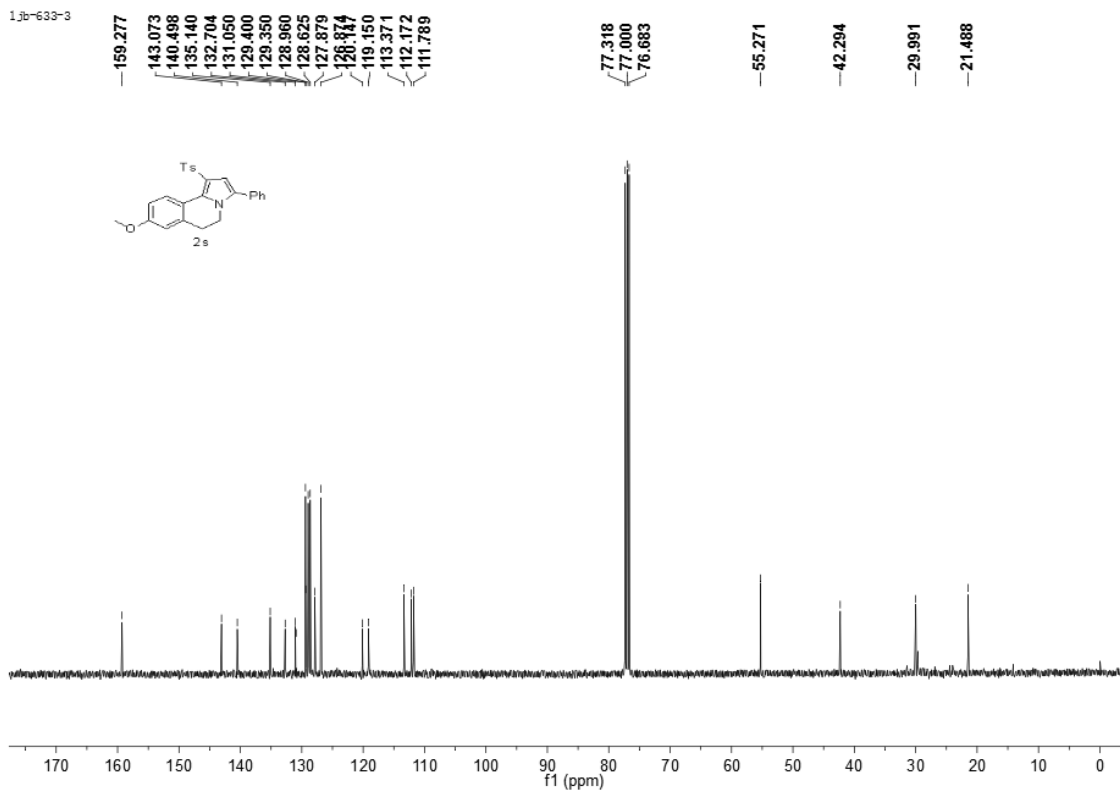



13b-629

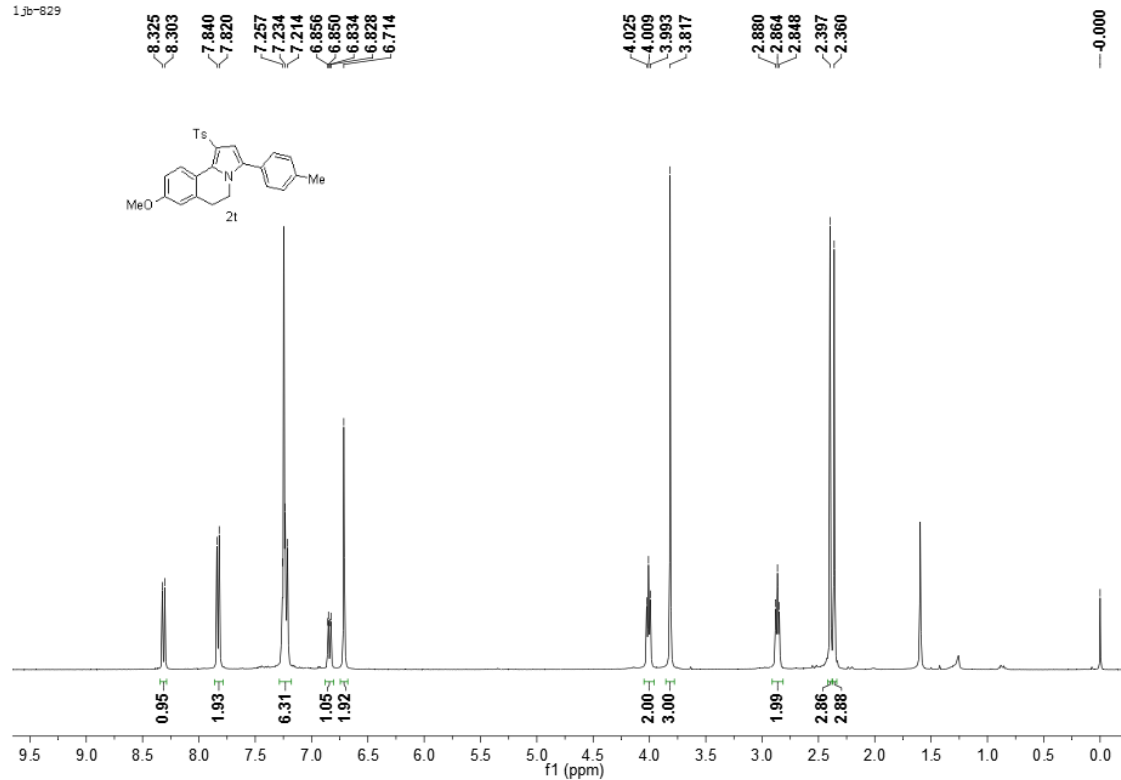

13b-629

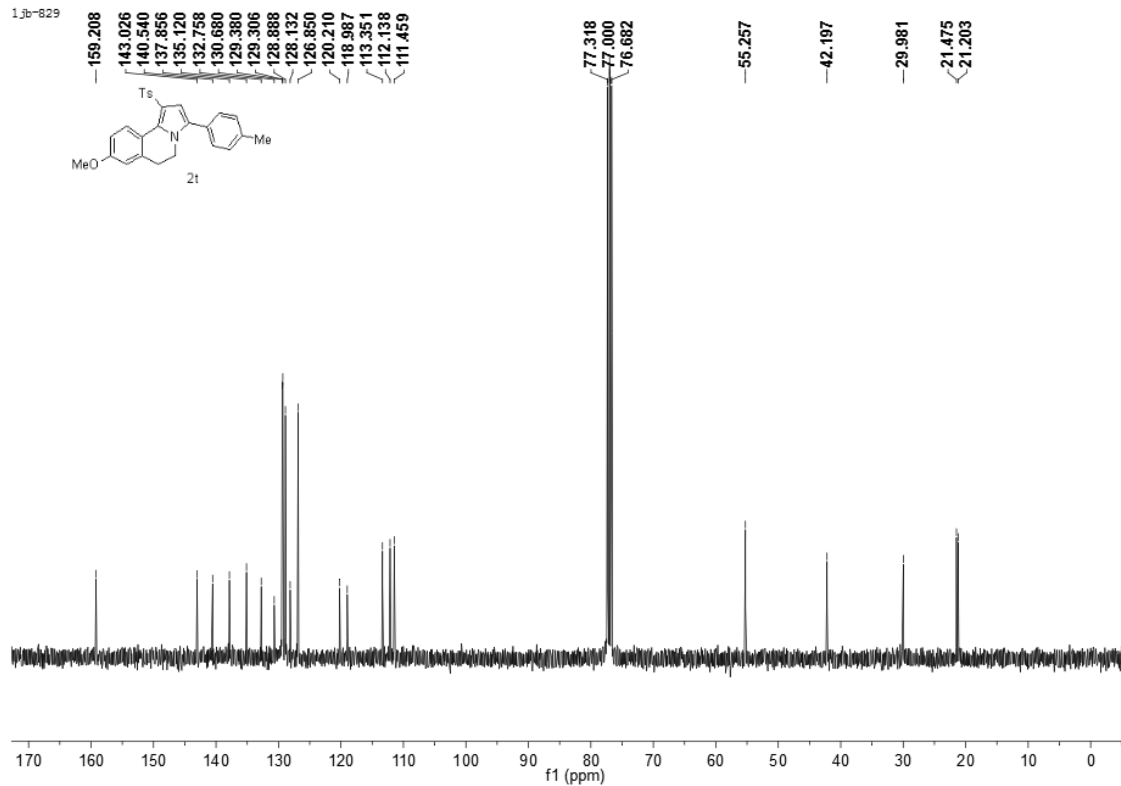

1\_jb-638

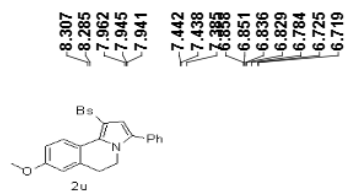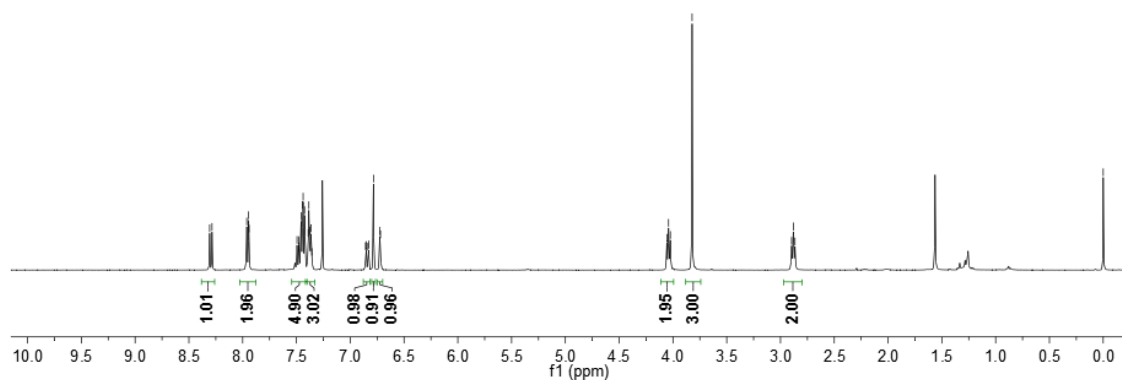

1\_jb-638

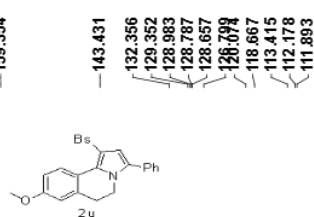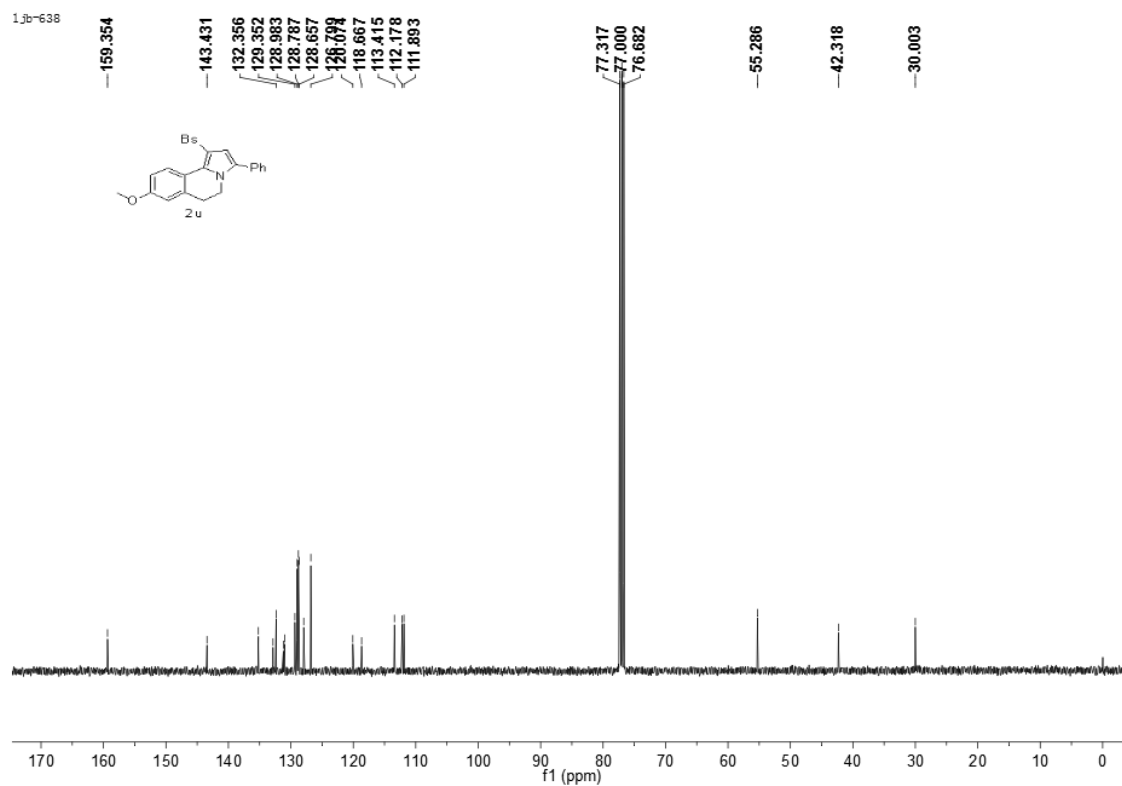

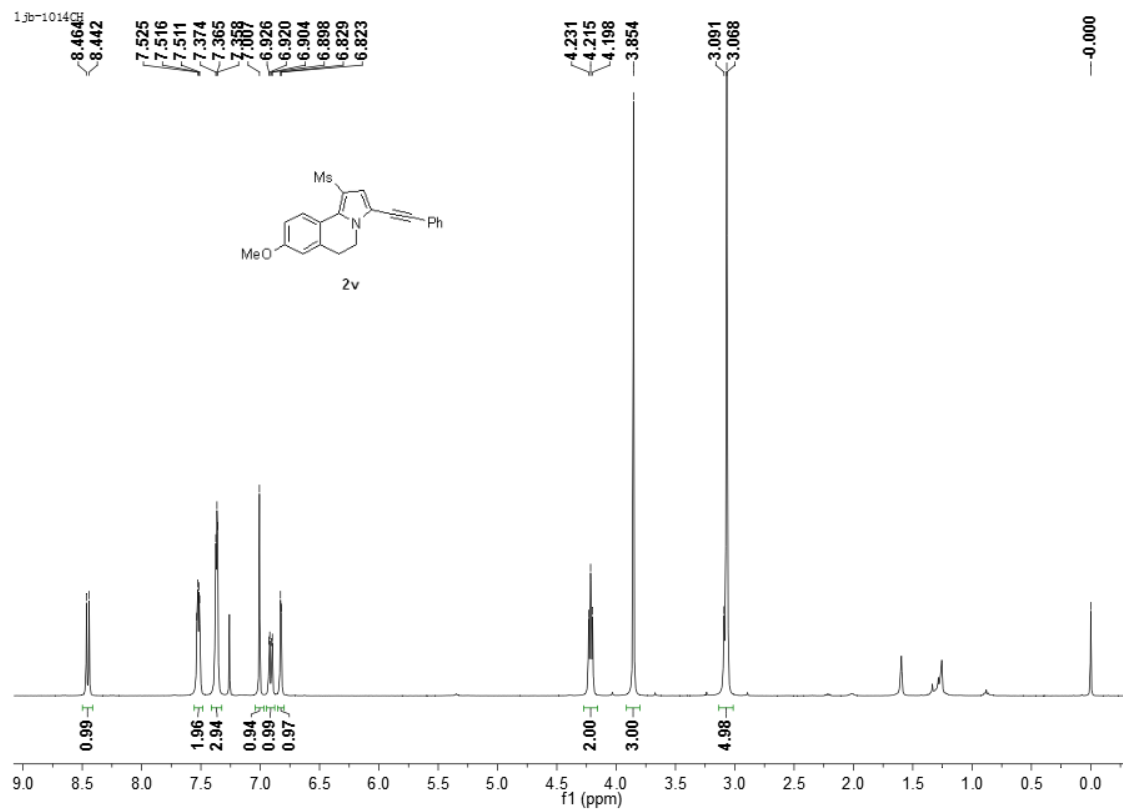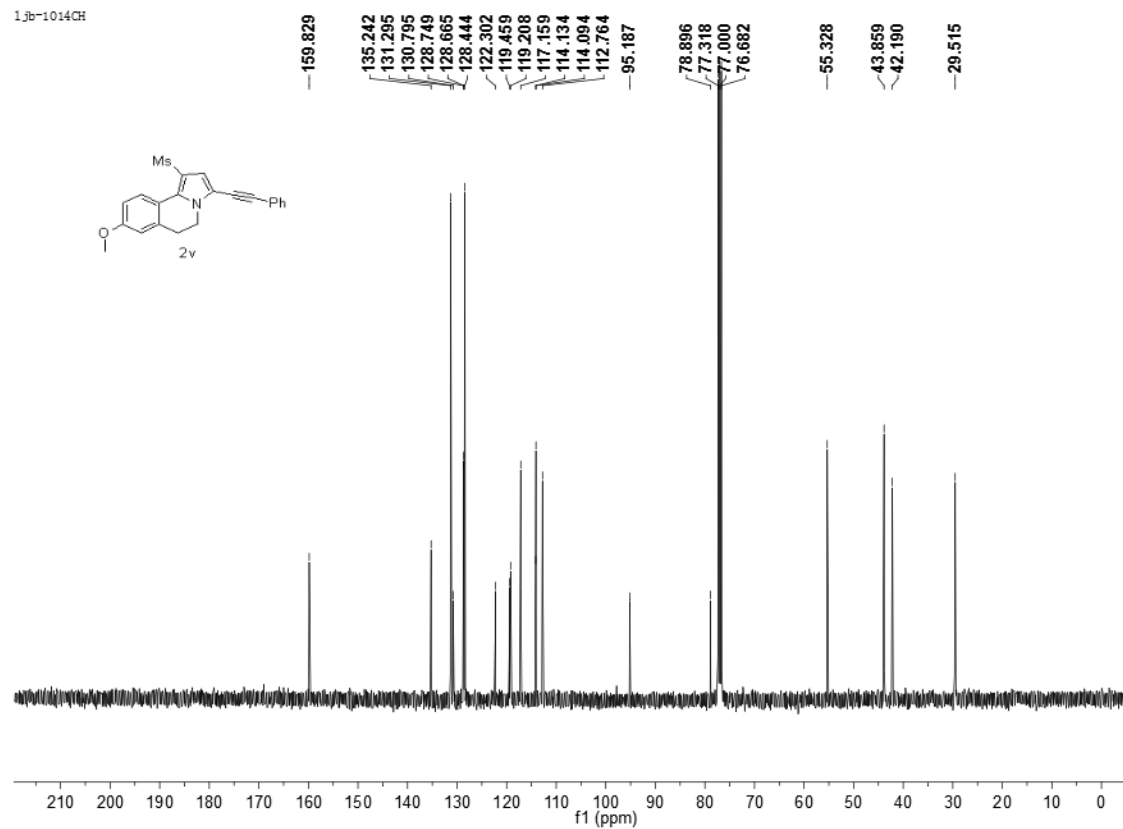

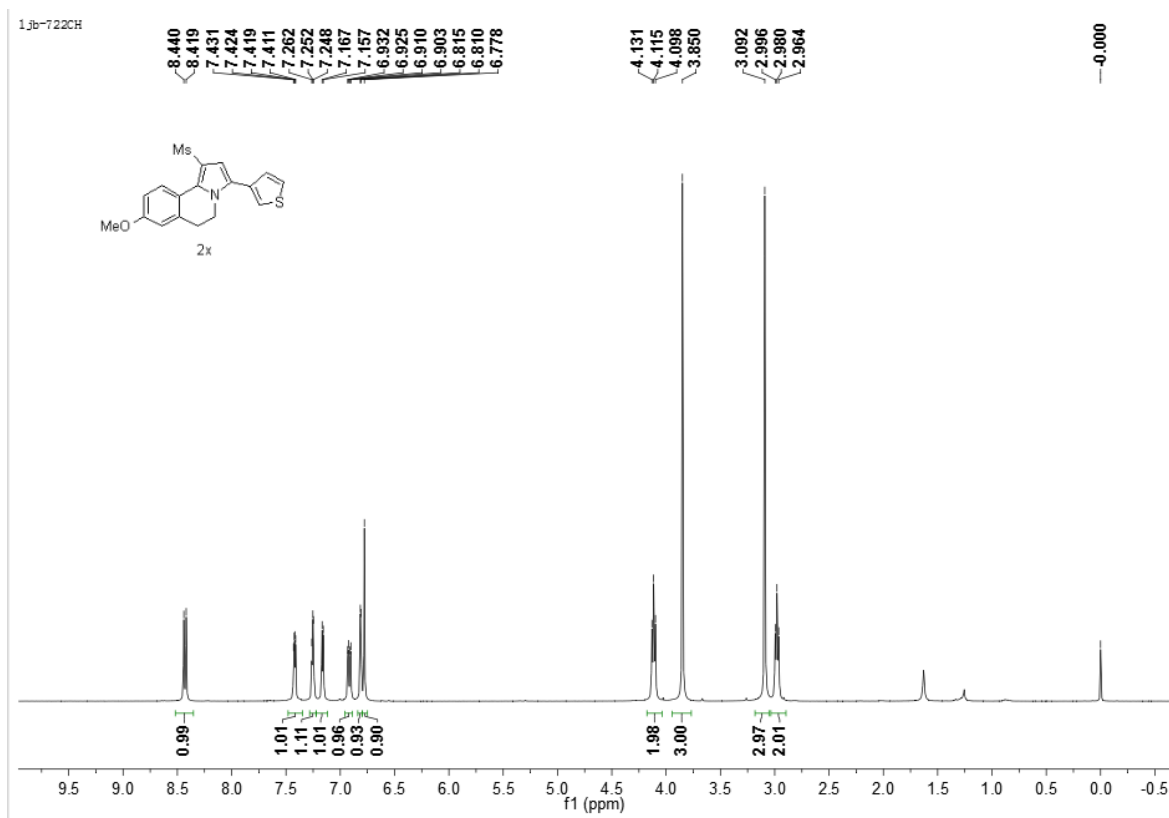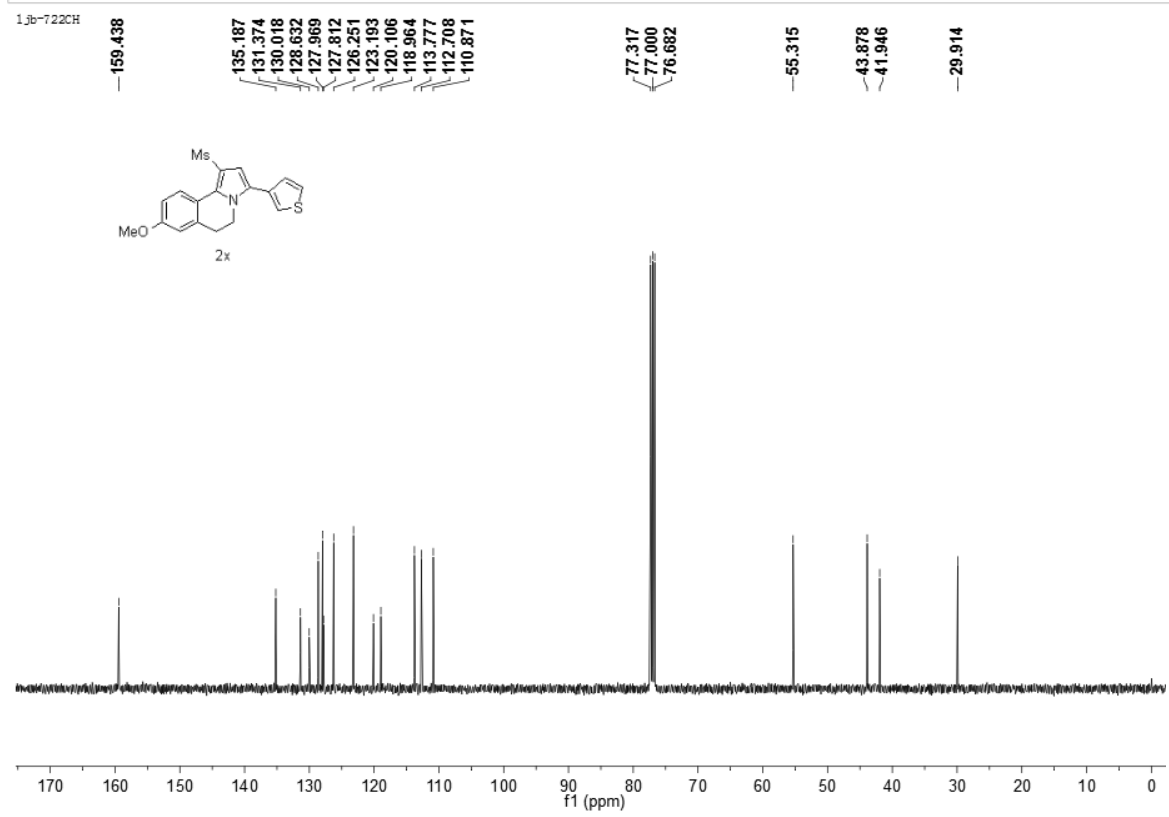

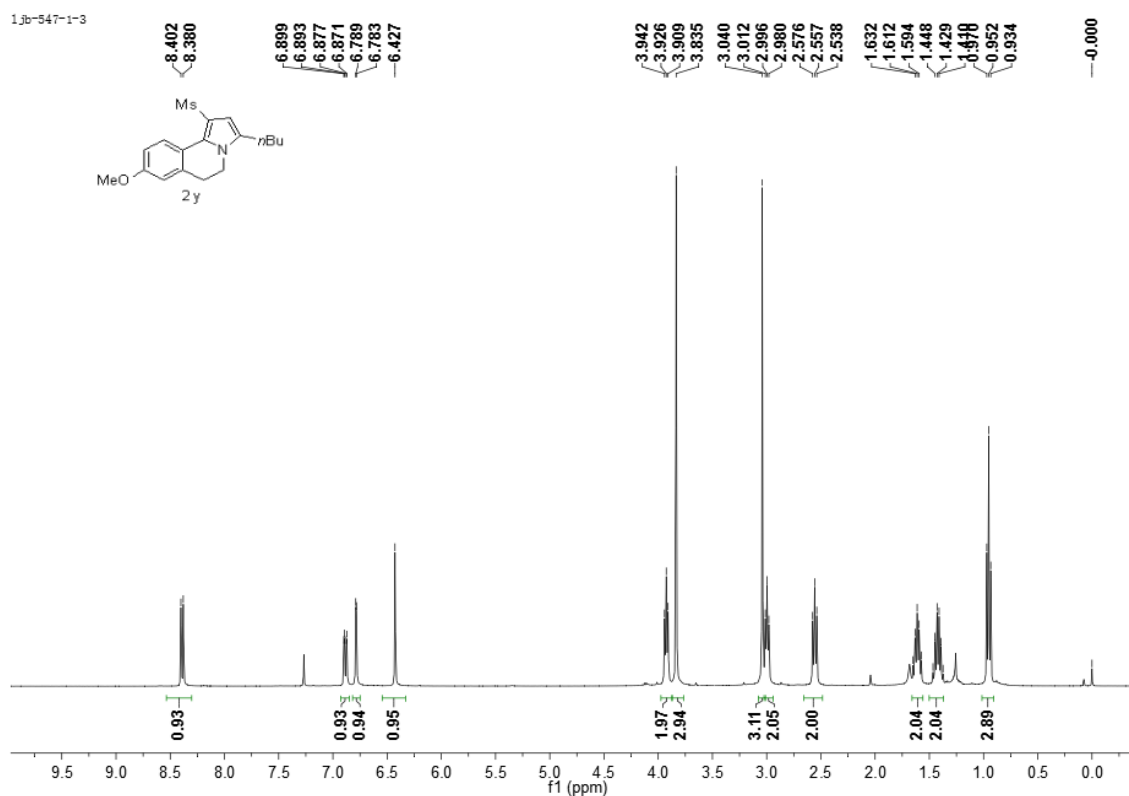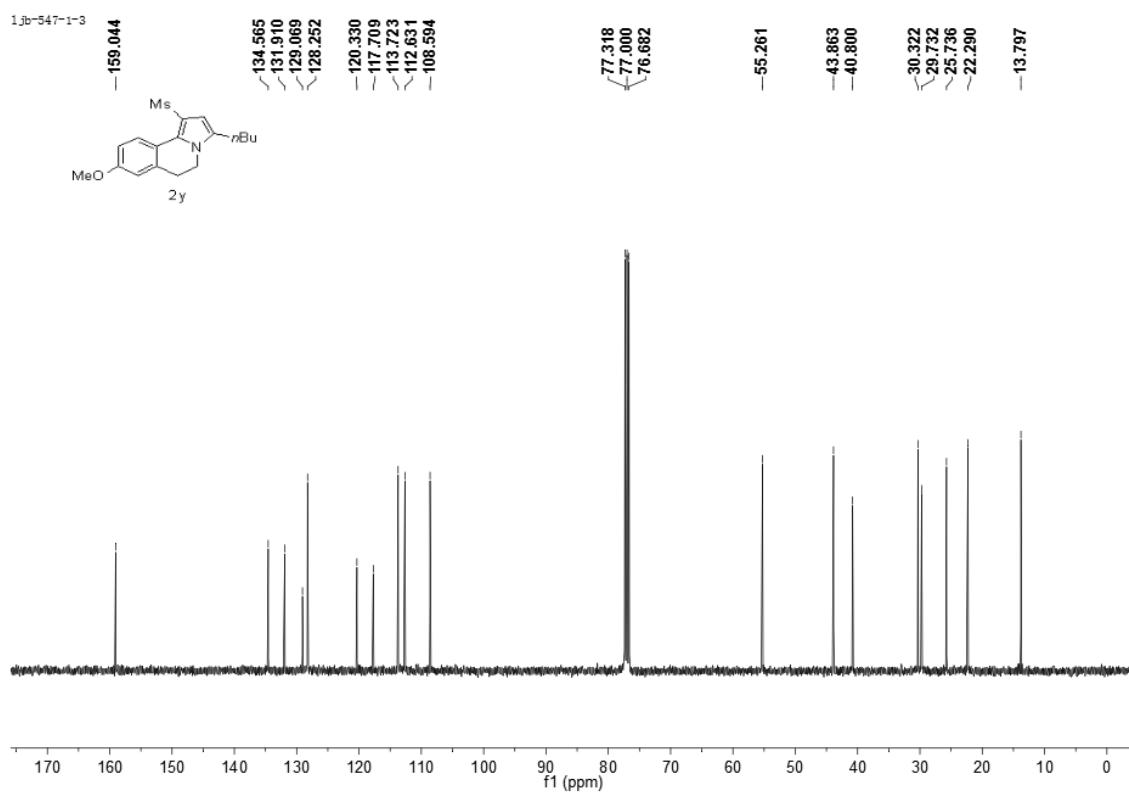

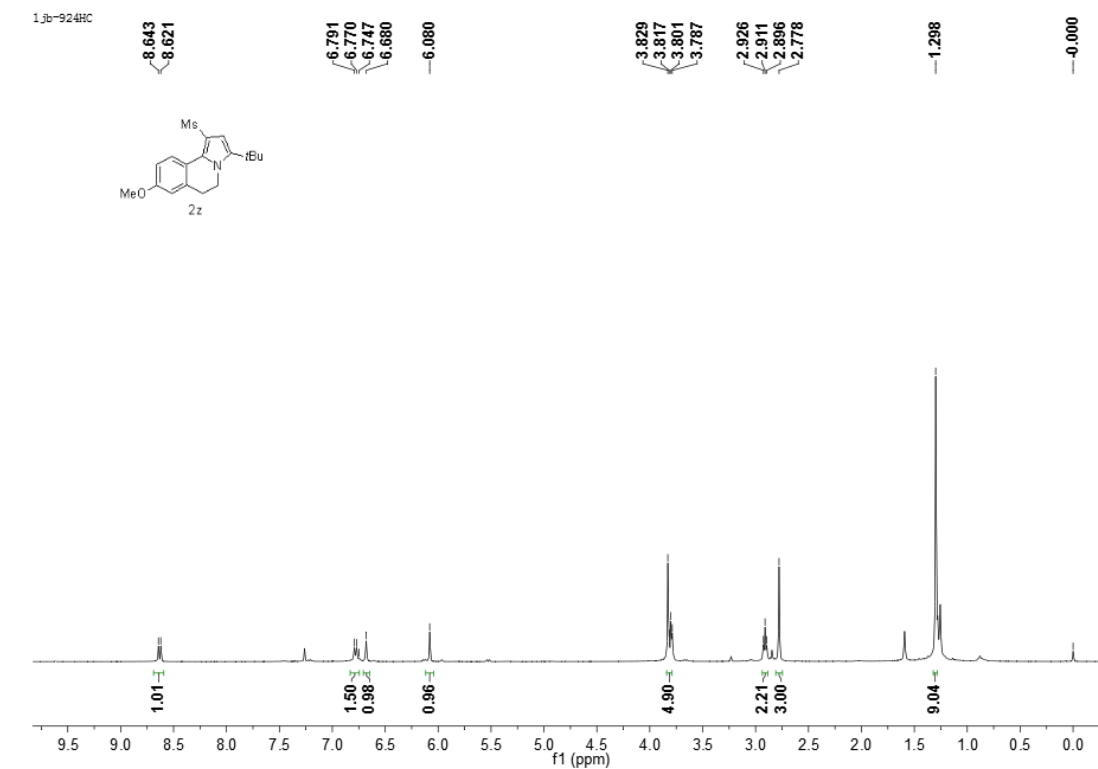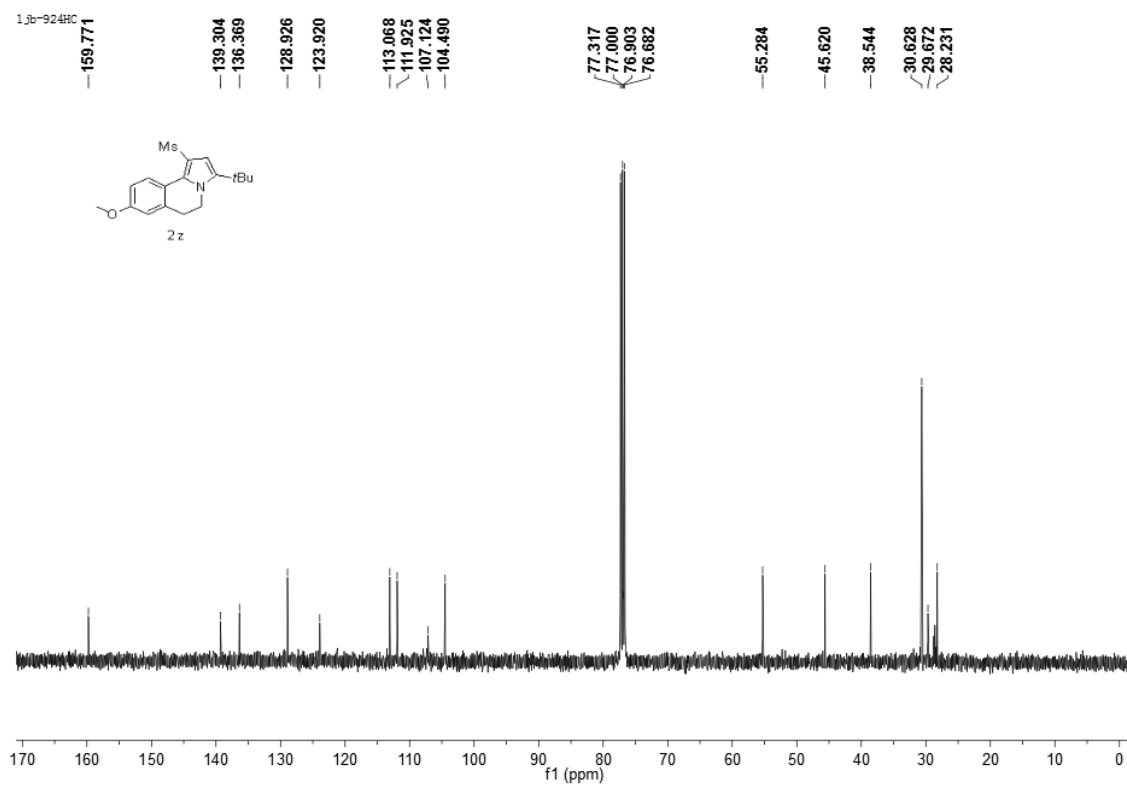

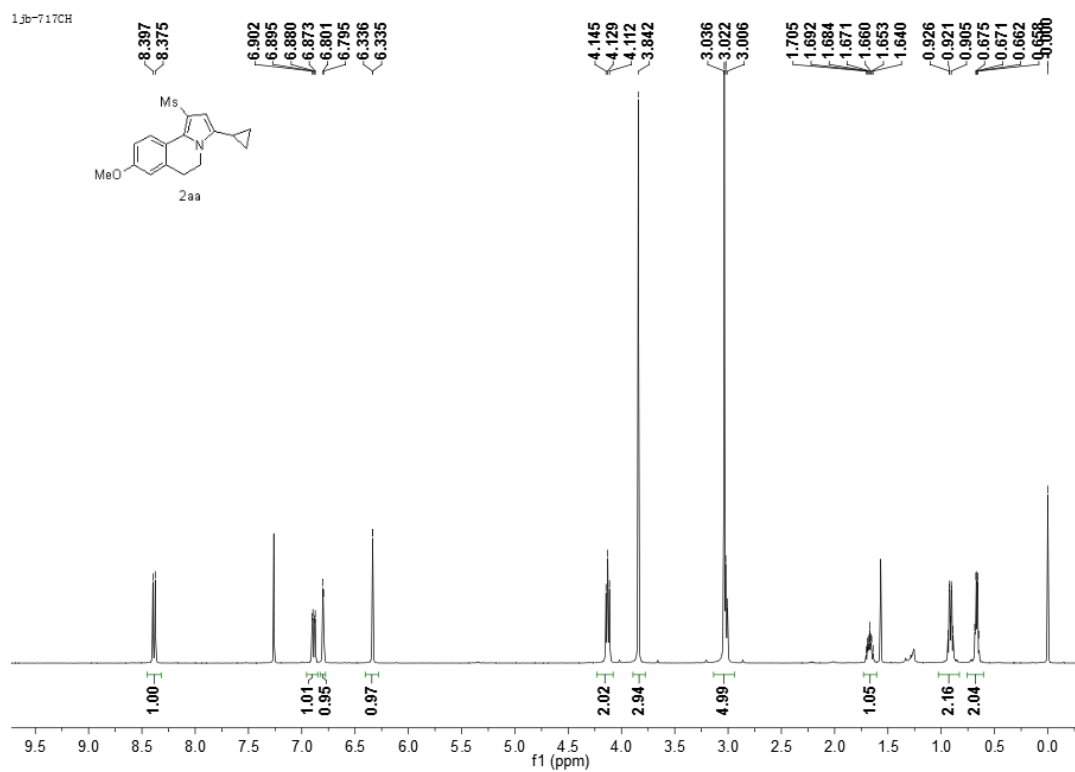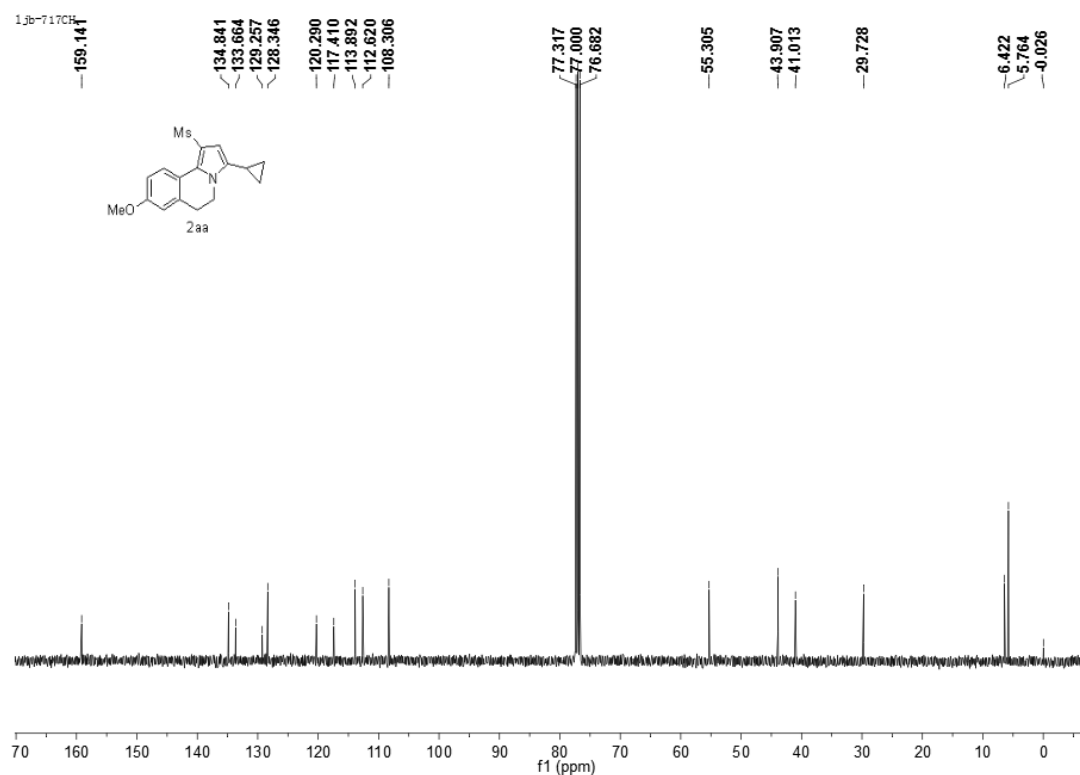

PC-4-37A

8.222

7.260

6.753

6.601

4.613

4.139

4.123

4.106

3.914

3.908

3.015

3.003

2.986

2.969

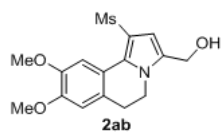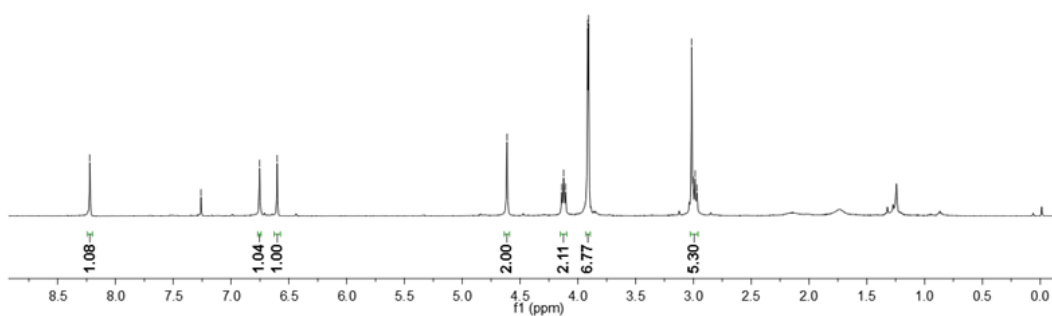

PC-4-37A

148.816

148.276

131.084

130.051

126.006

119.546

117.884

111.460

110.954

110.299

77.318

77.000

76.682

56.159

55.919

44.039

41.699

28.739

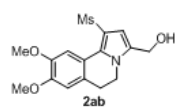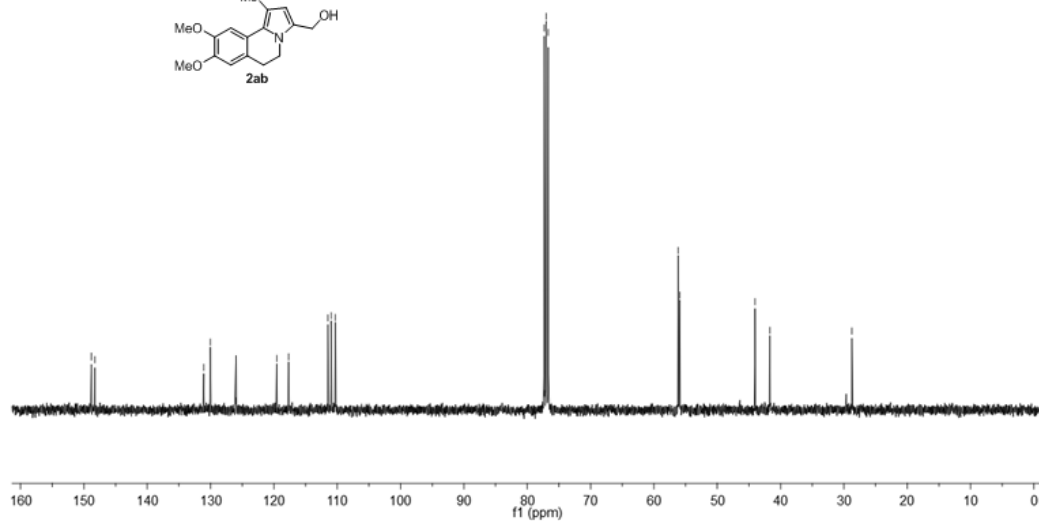



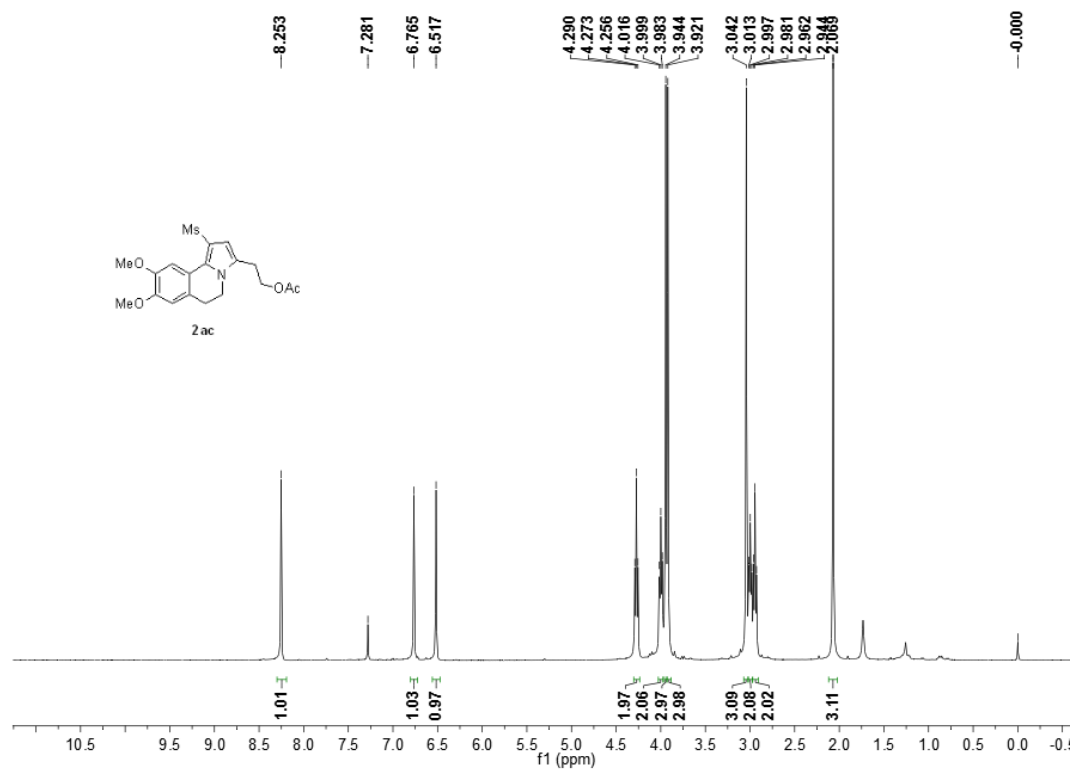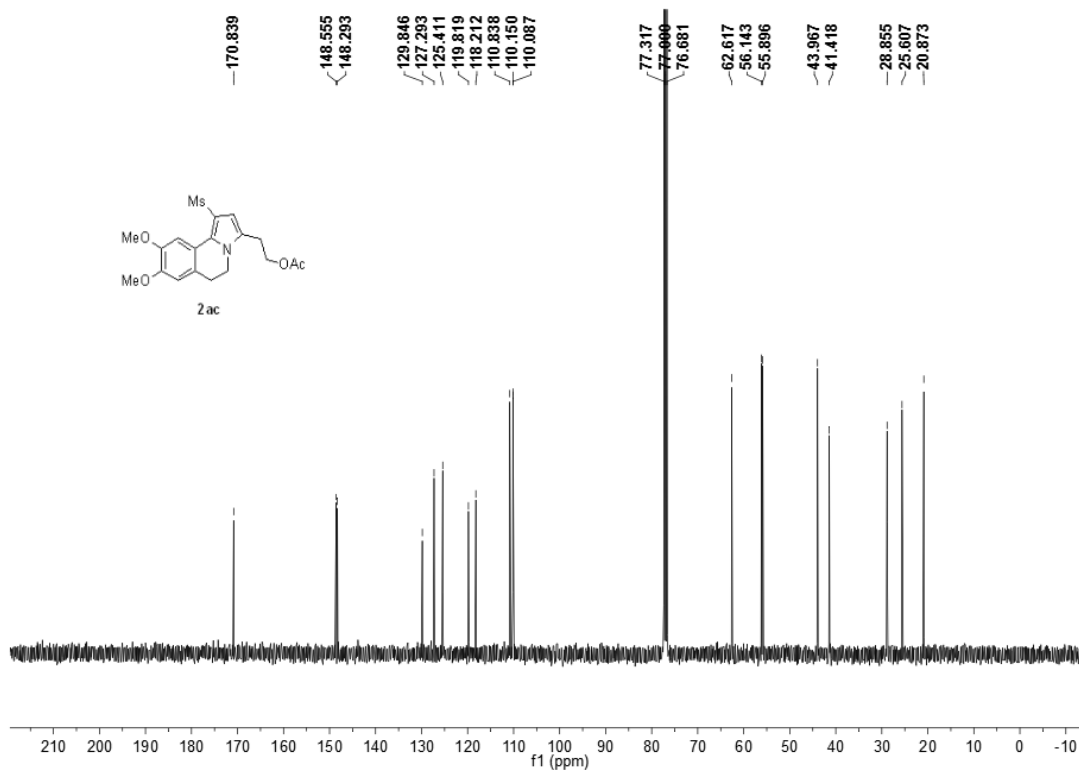

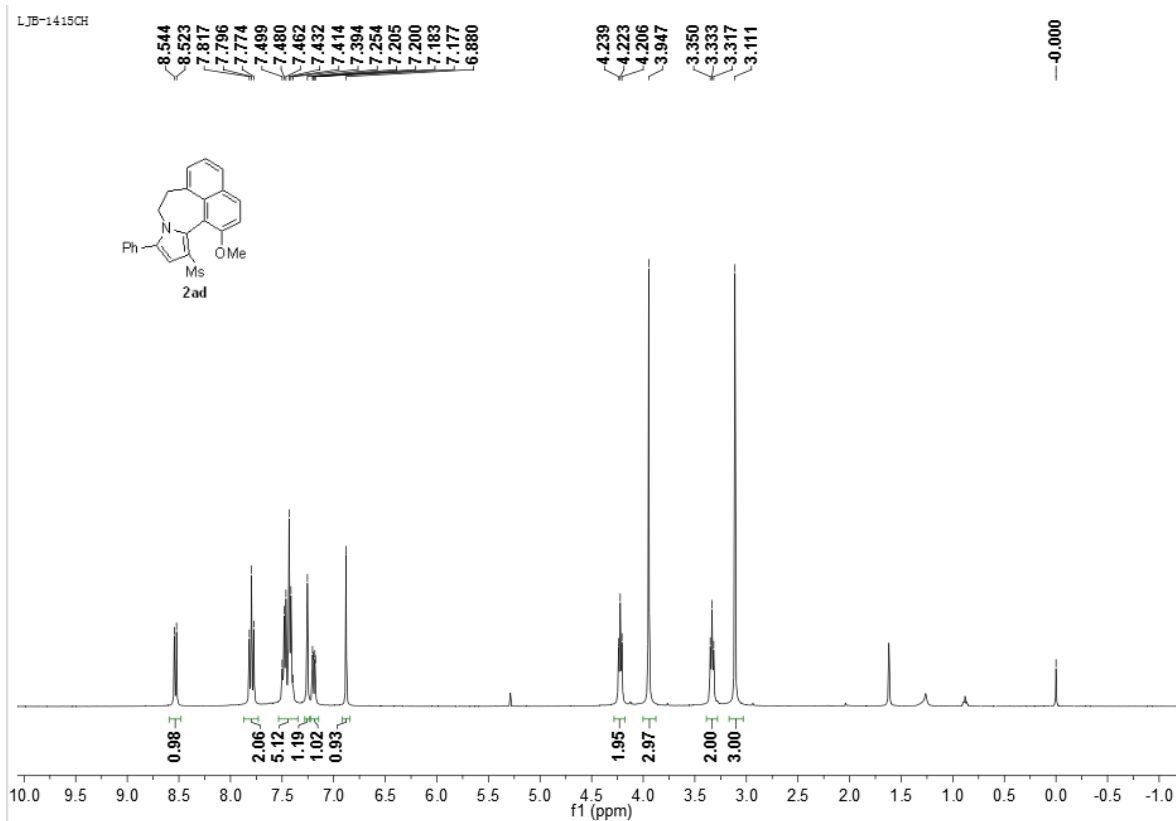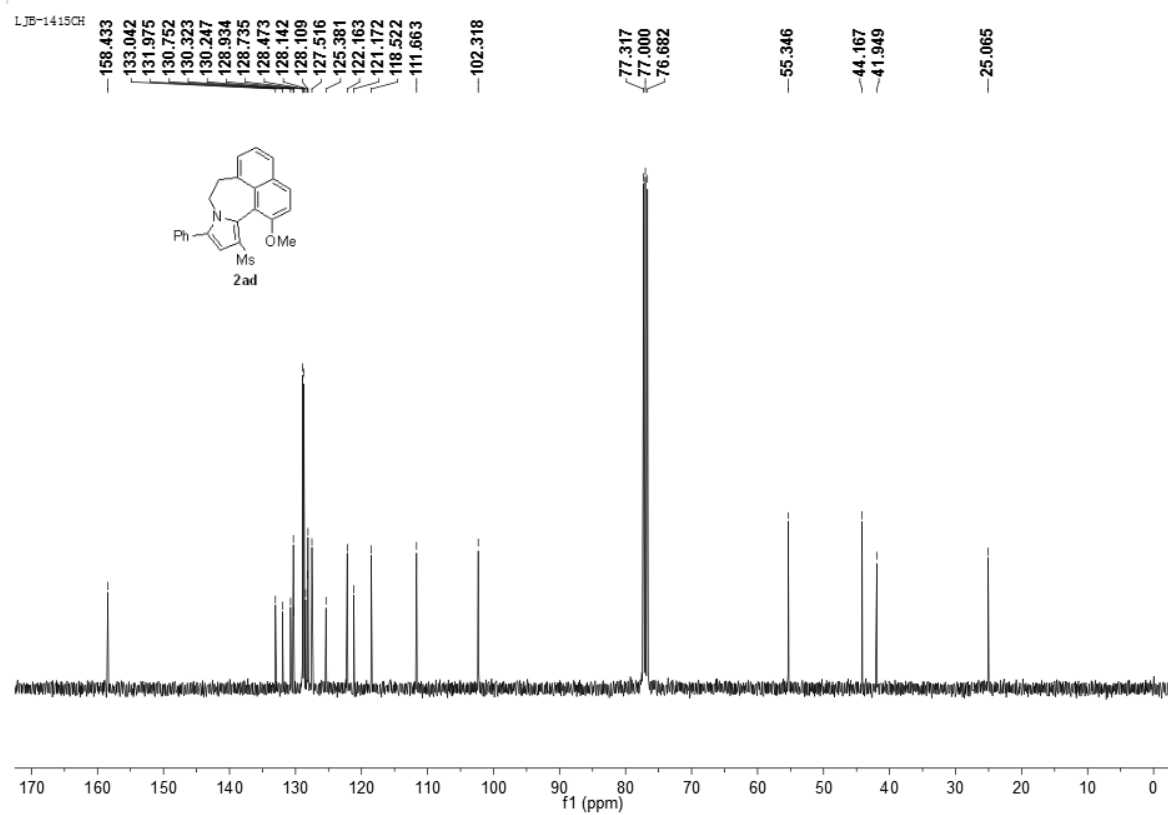

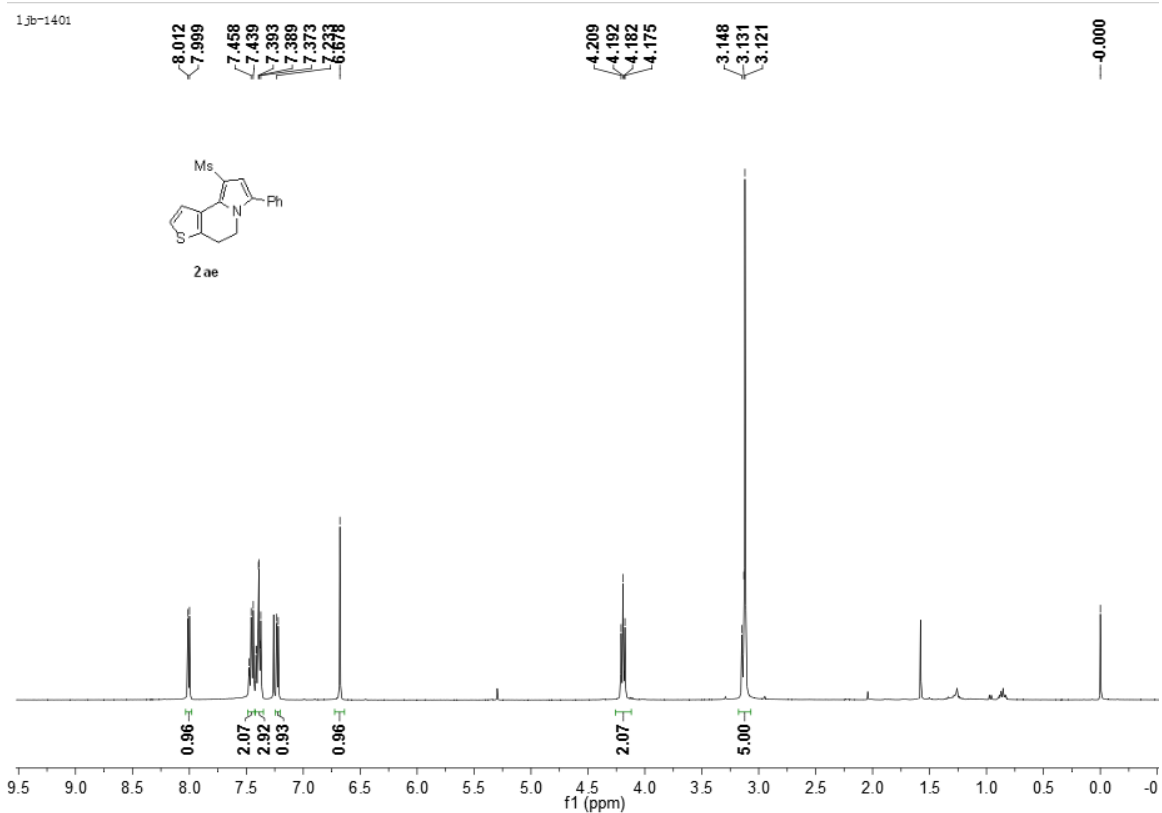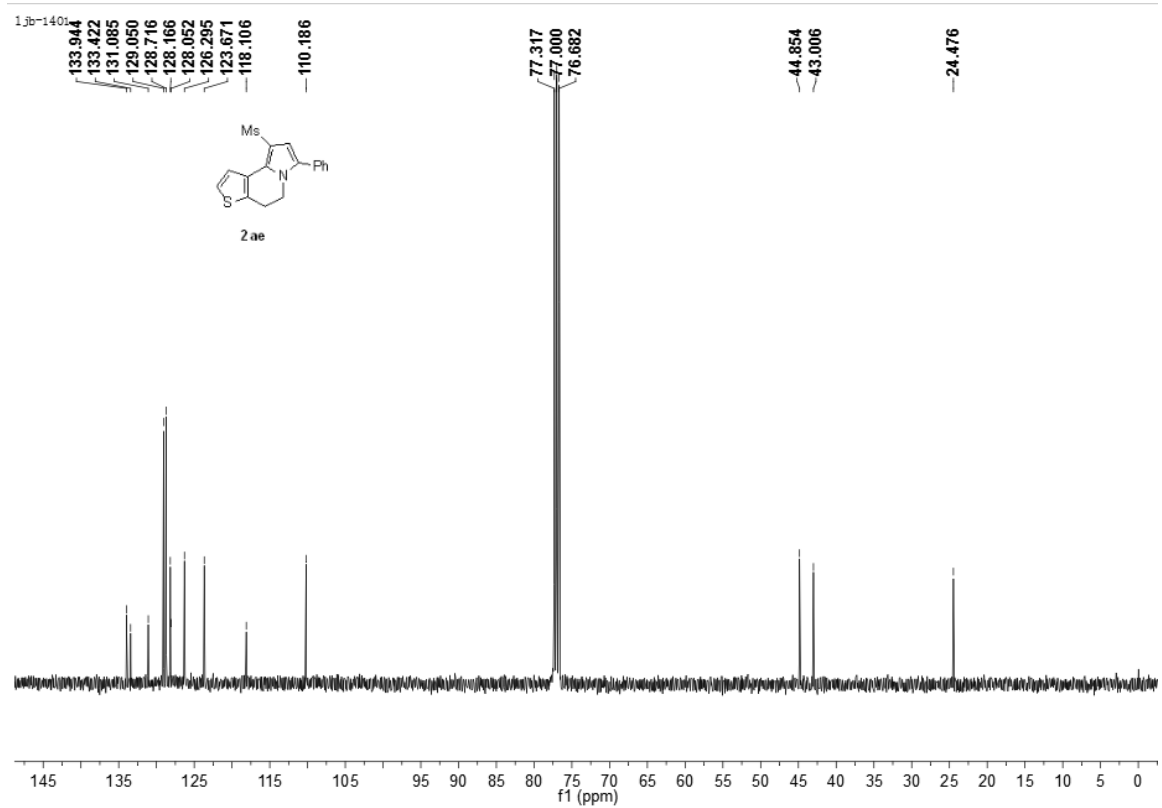

LJB-1413CH

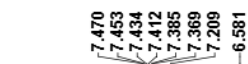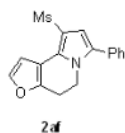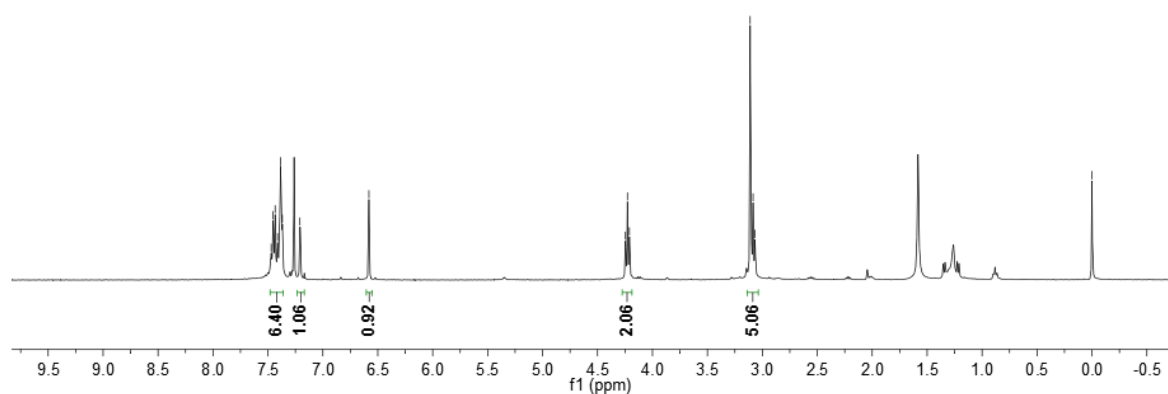

LJB-1413CH

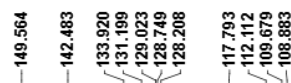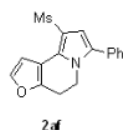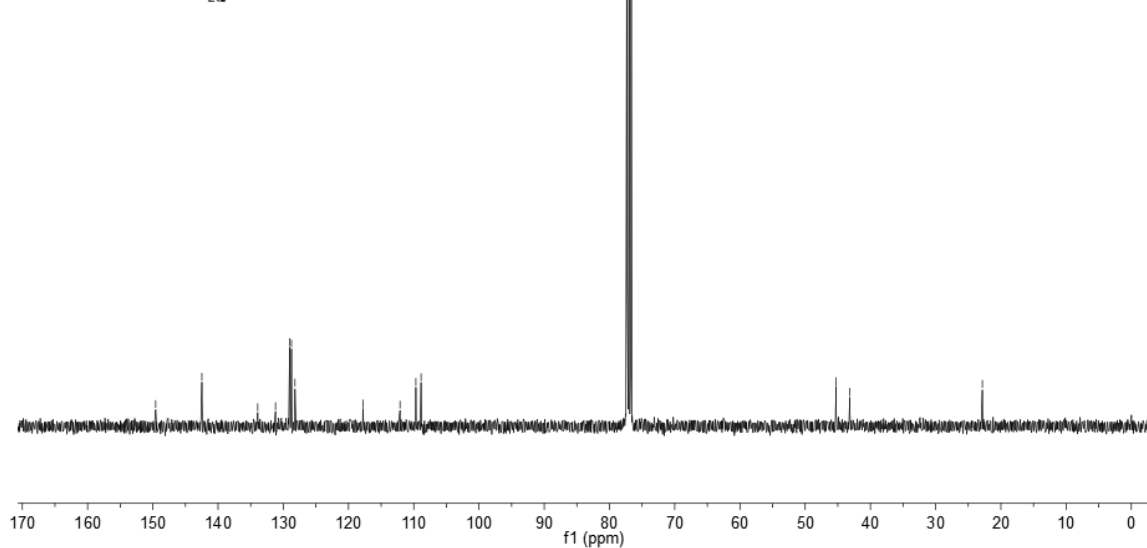

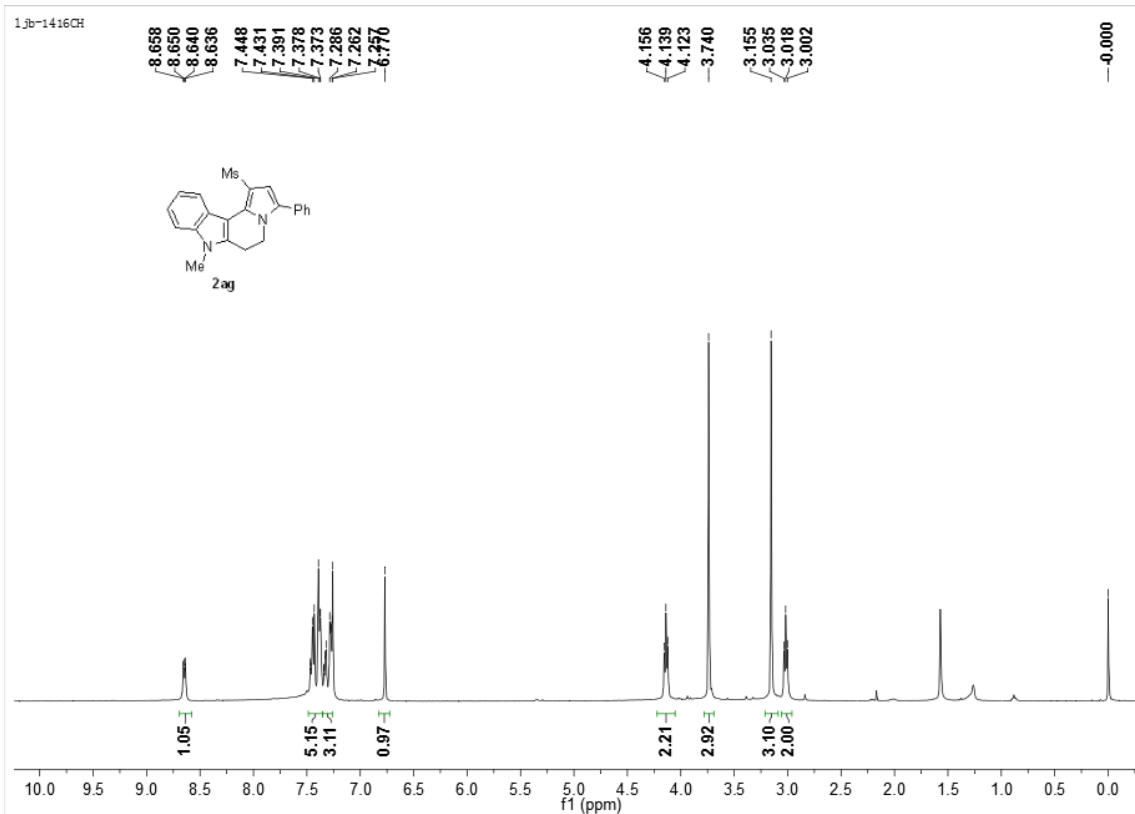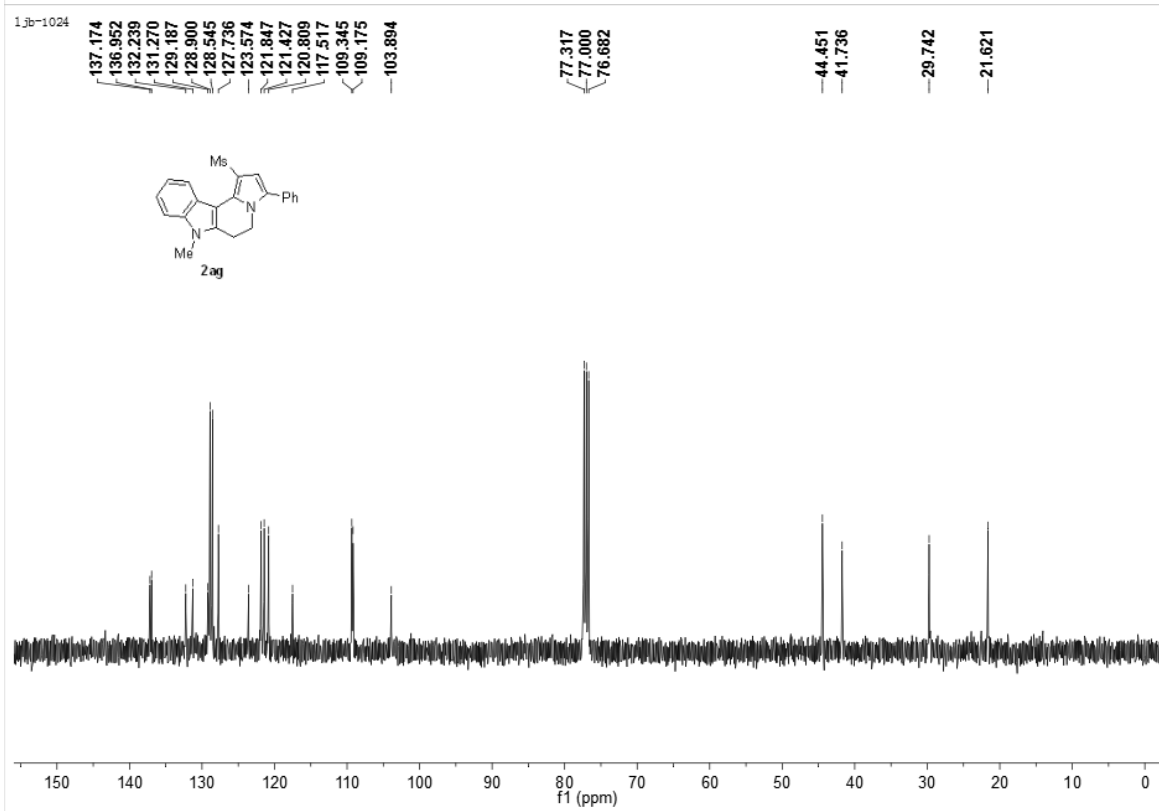

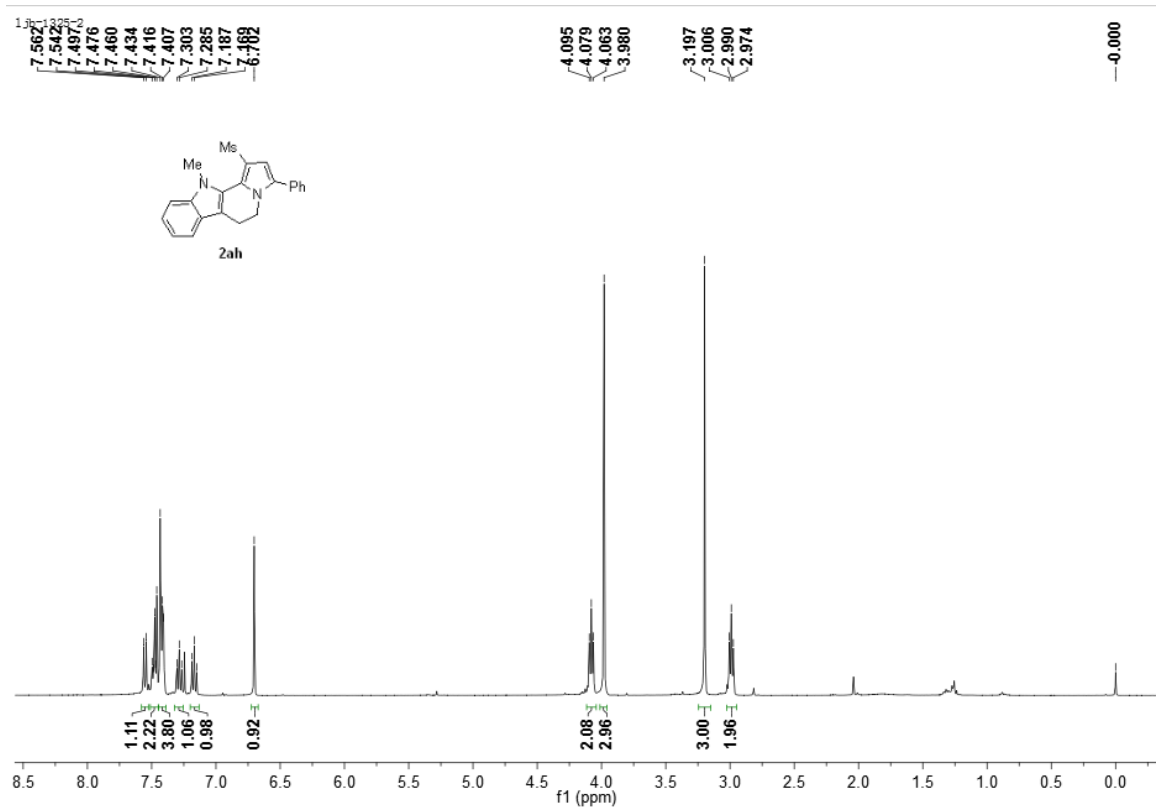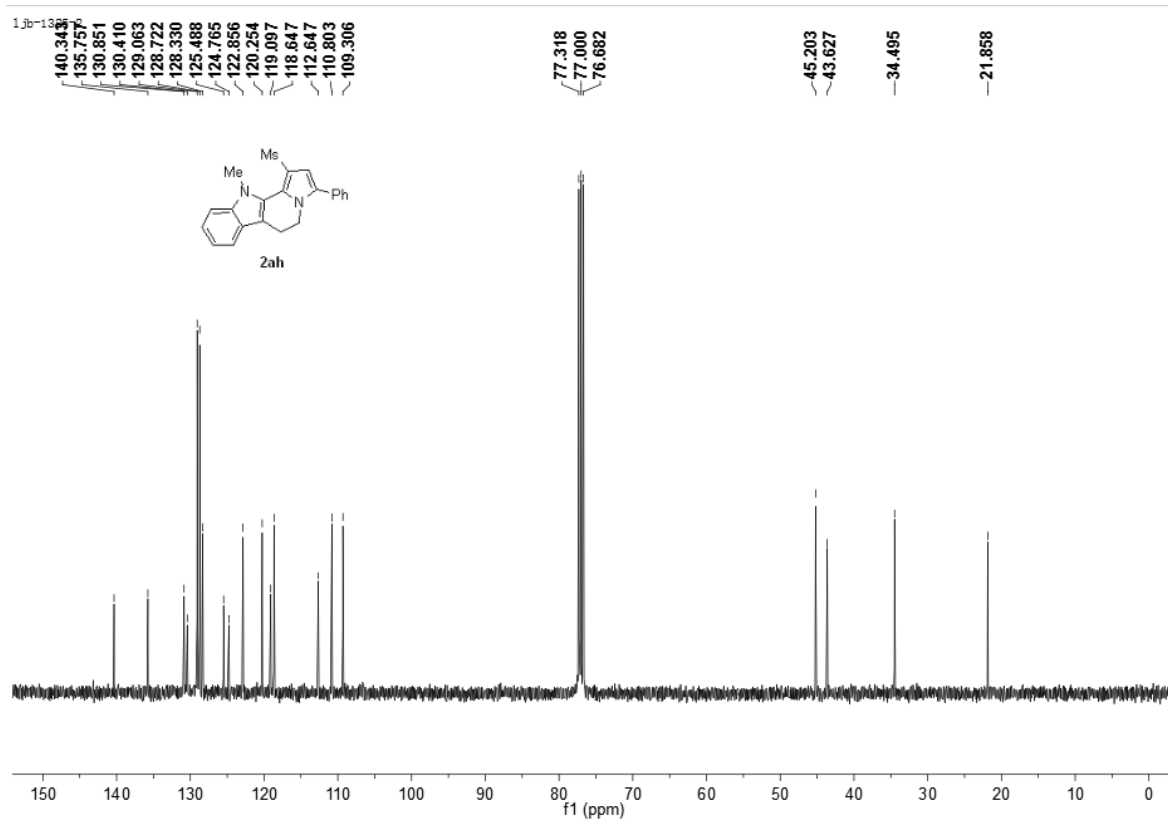

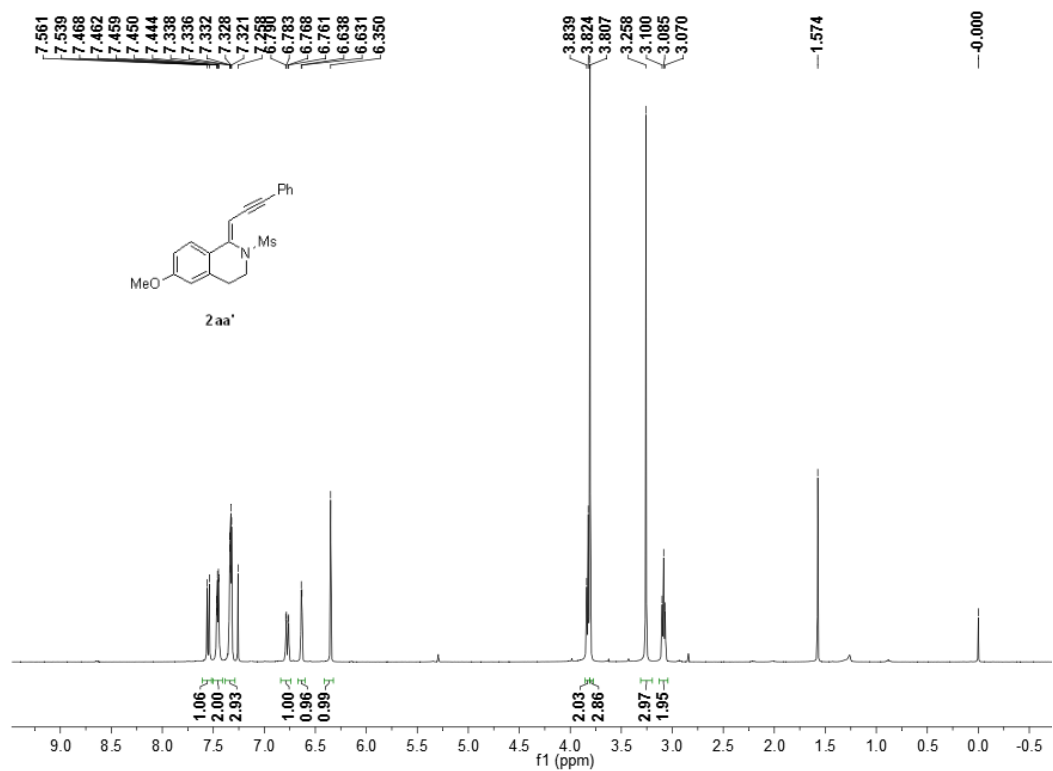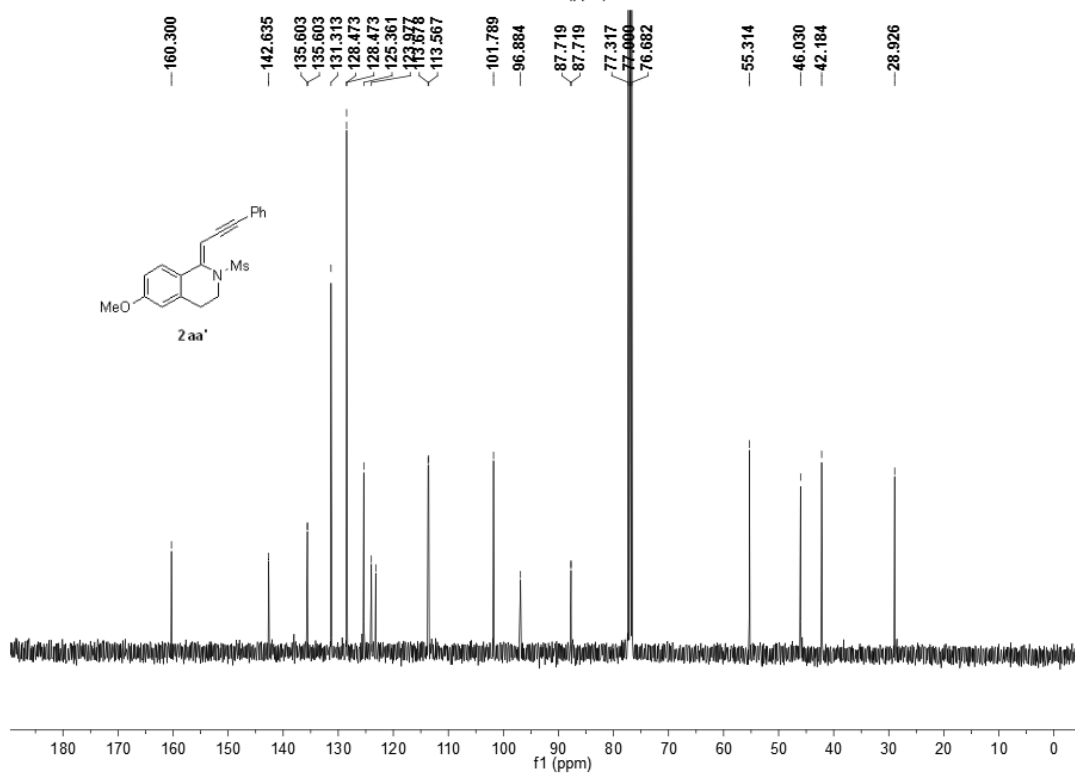

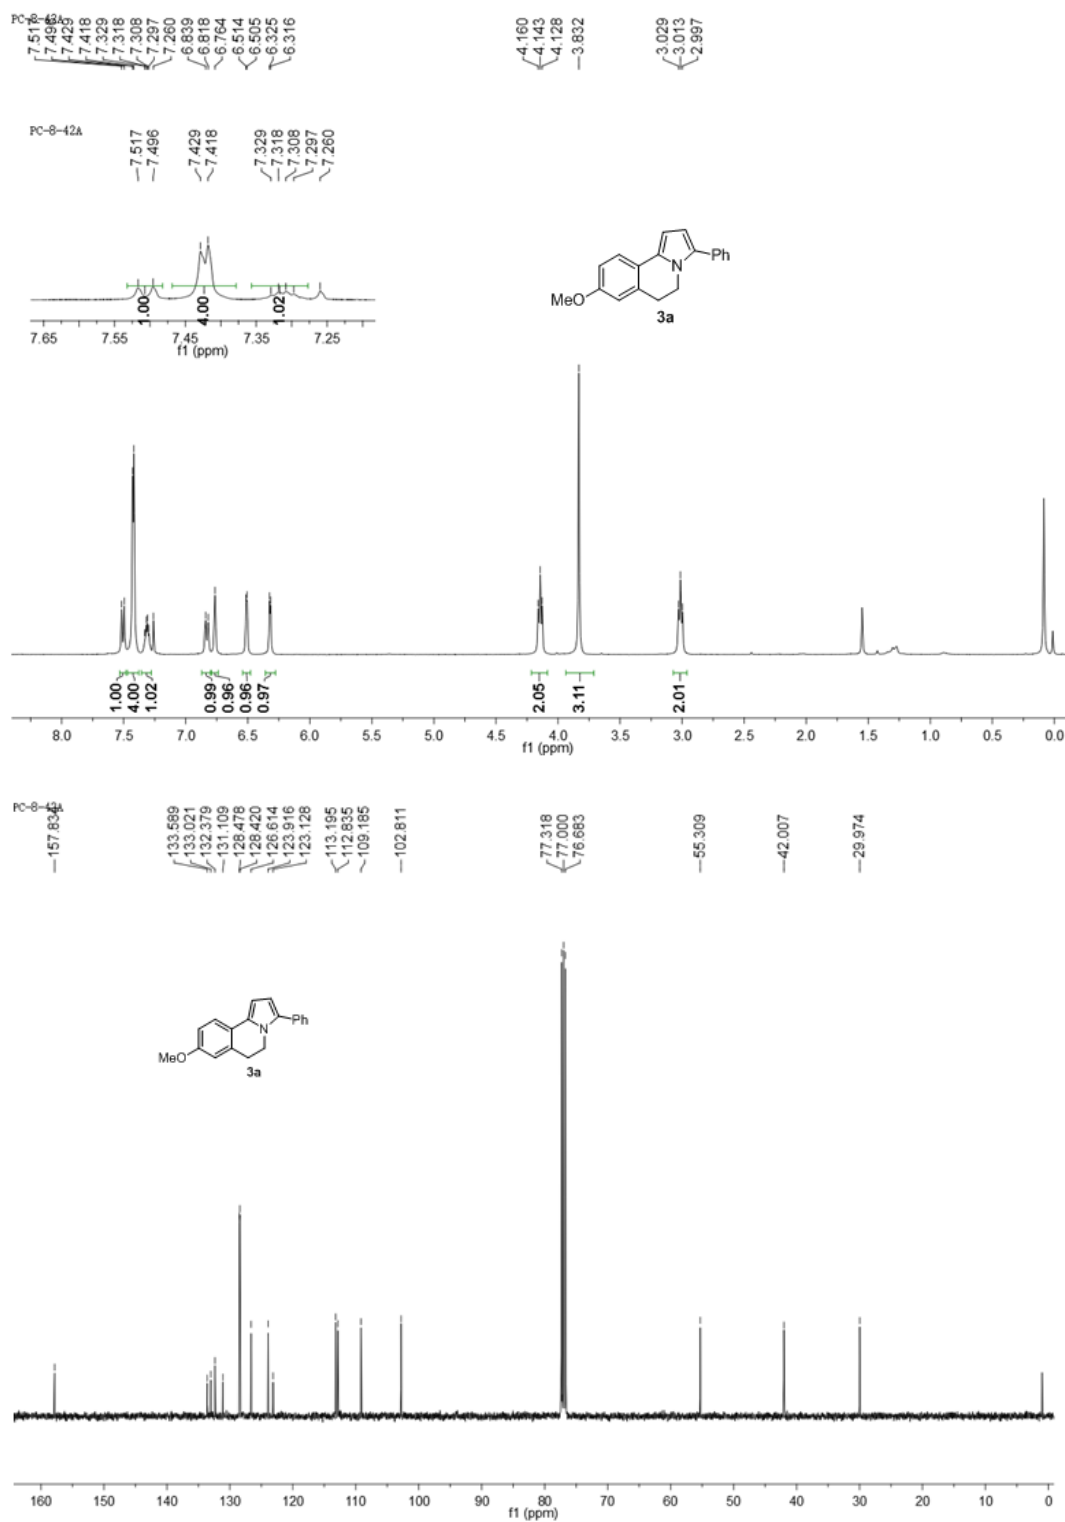



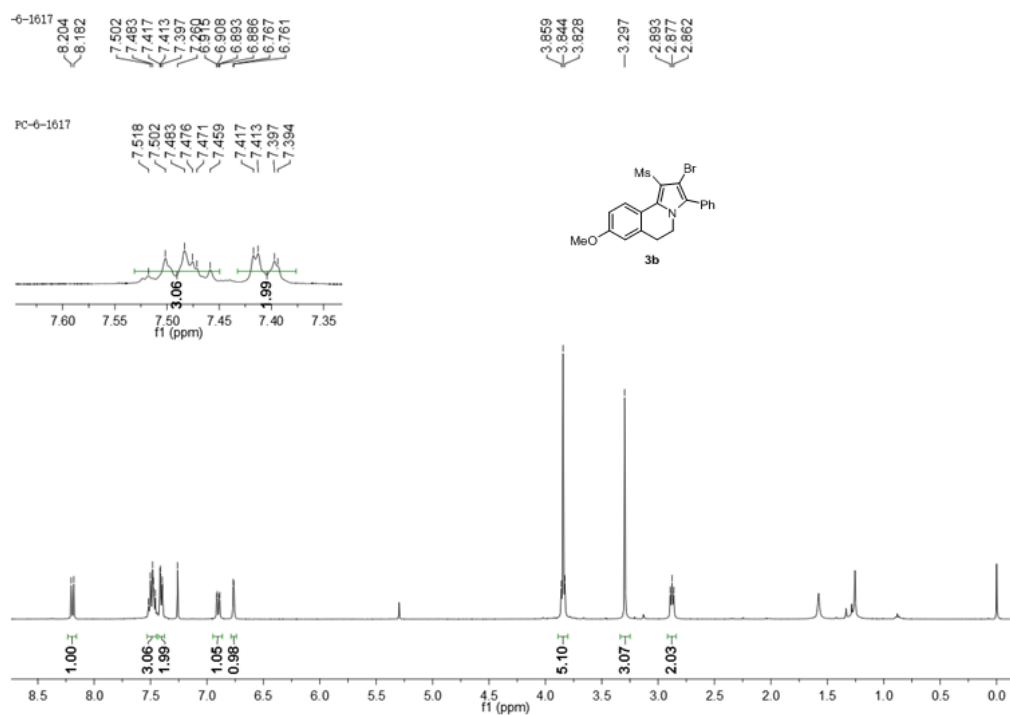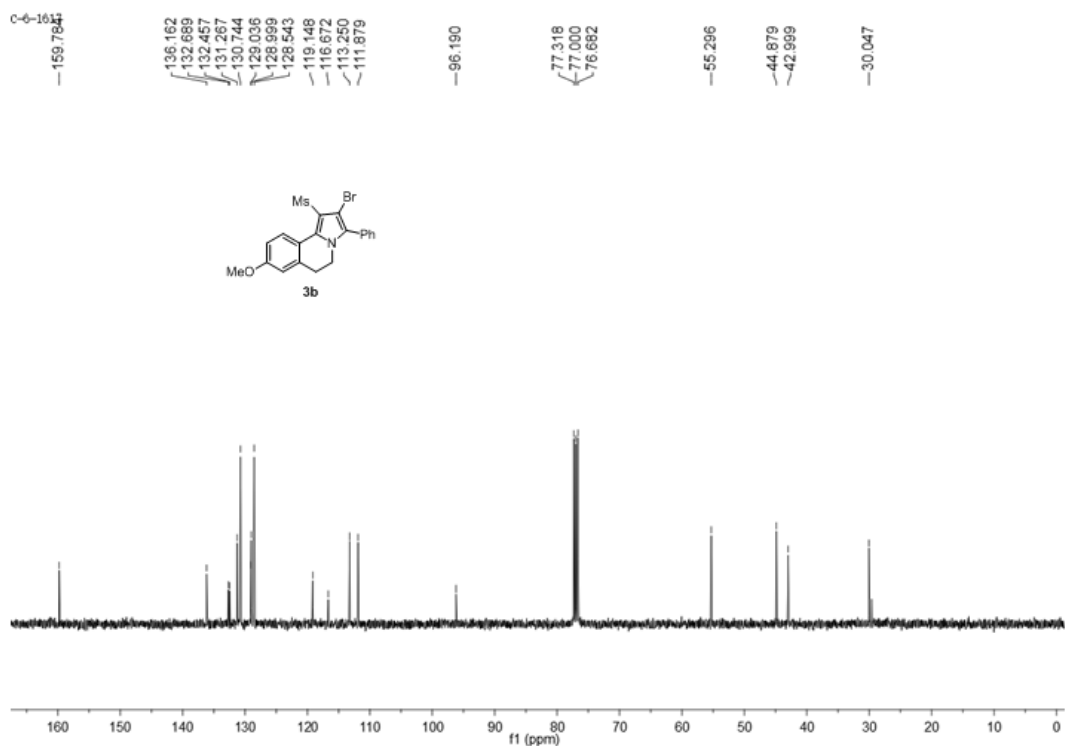

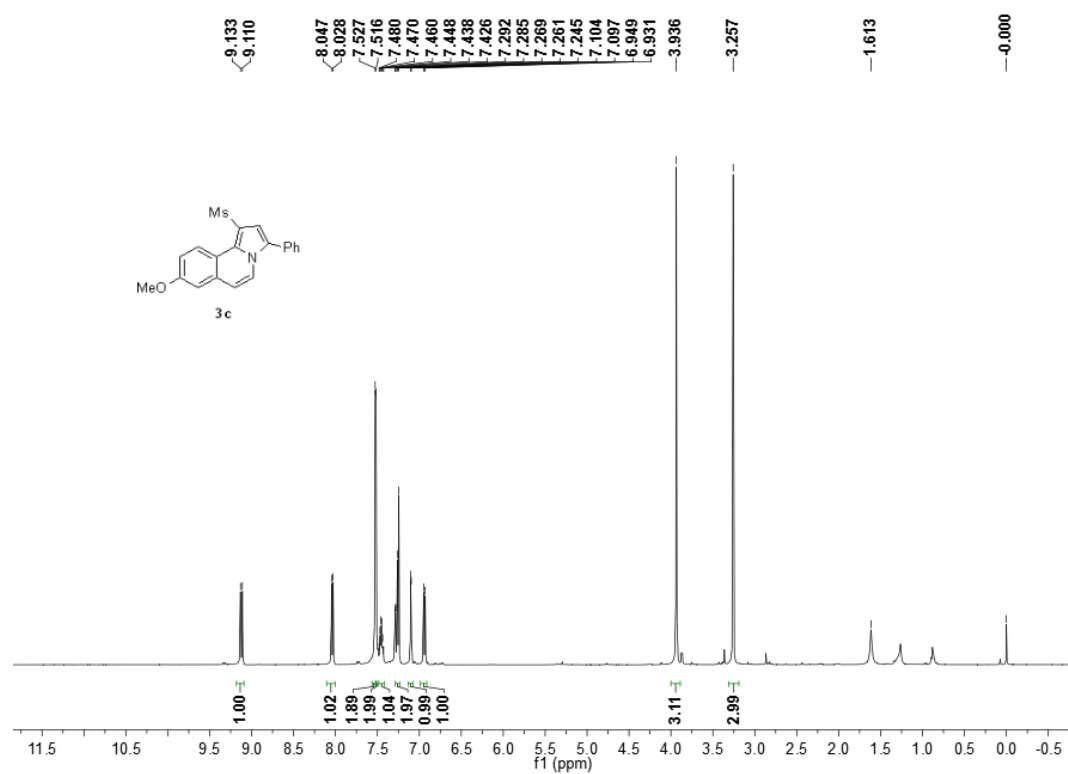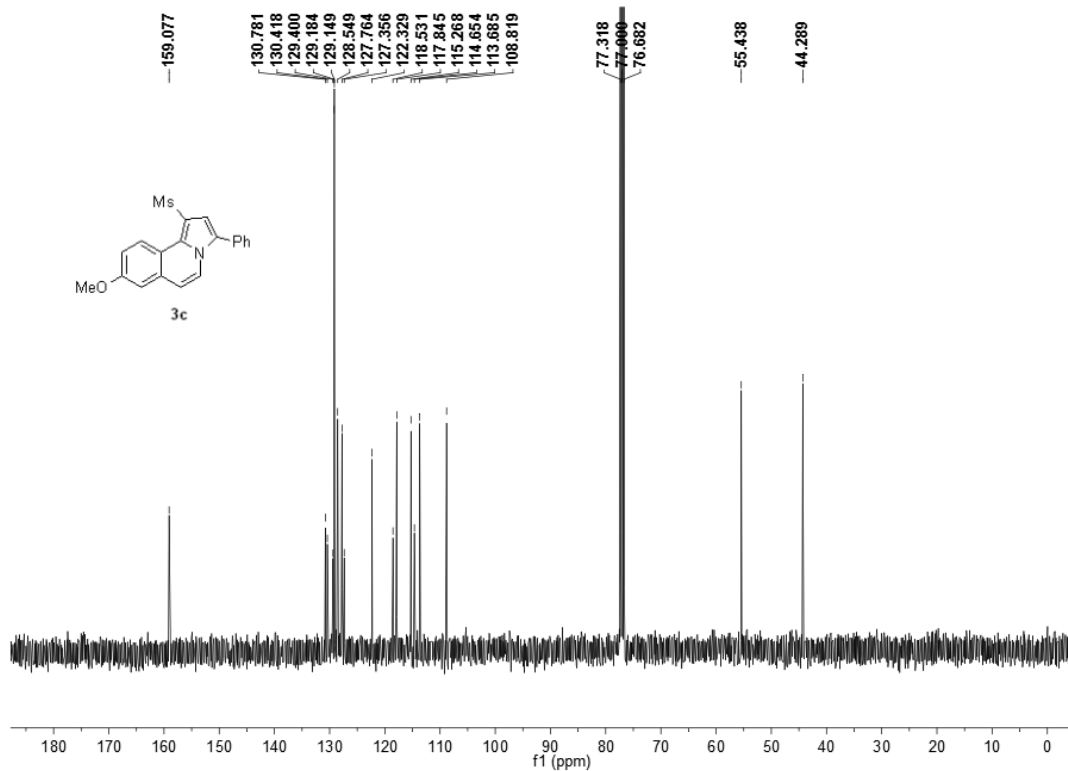

1\_jb-1101CH

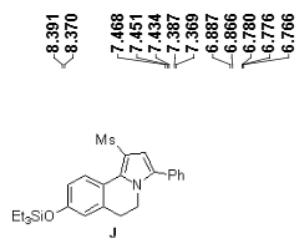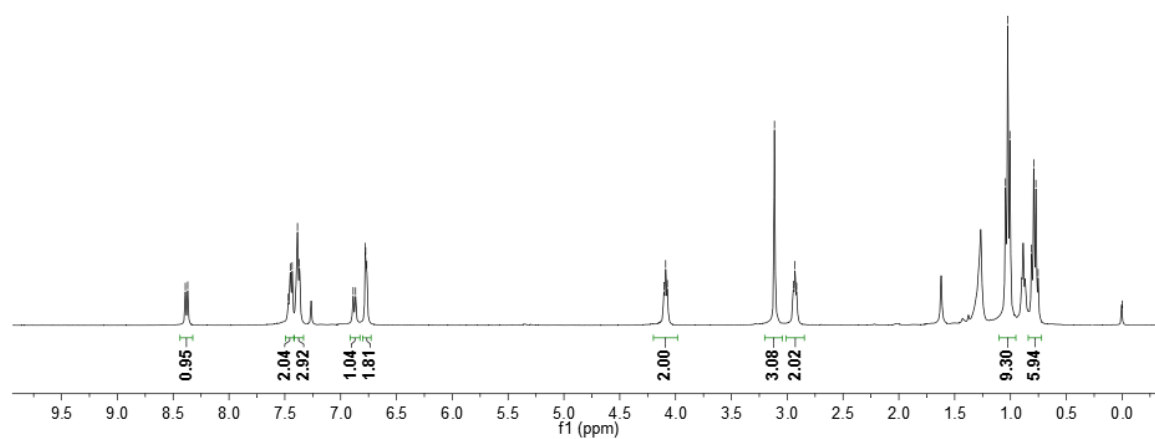

1\_jb-1101CH

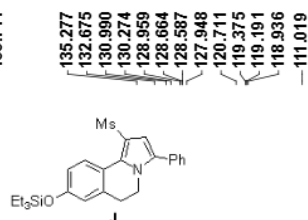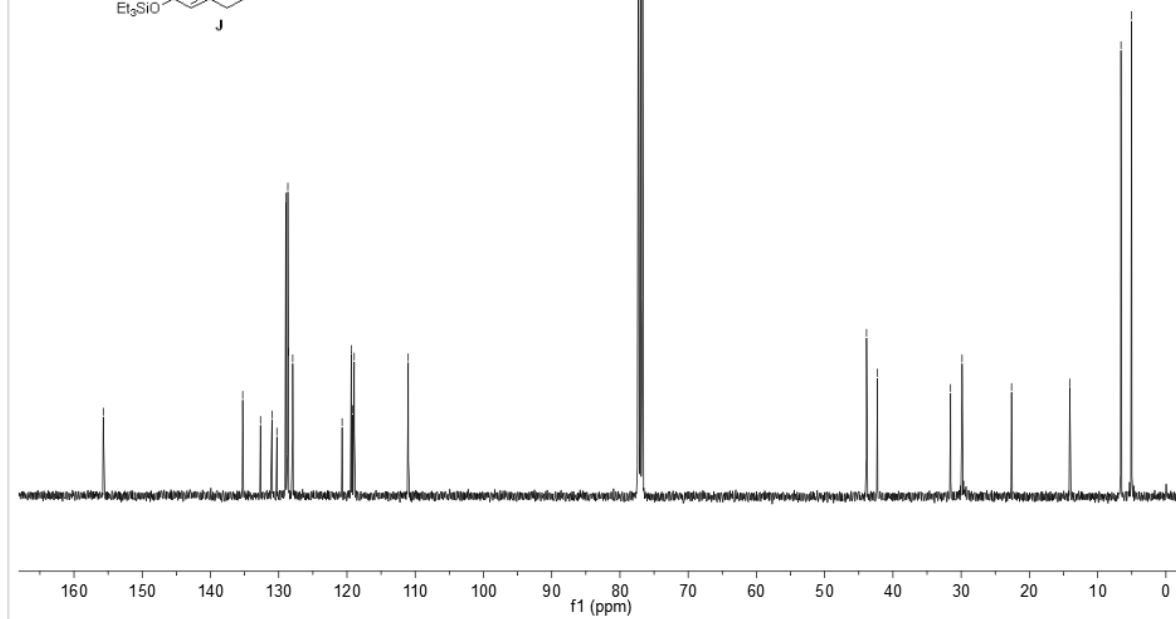

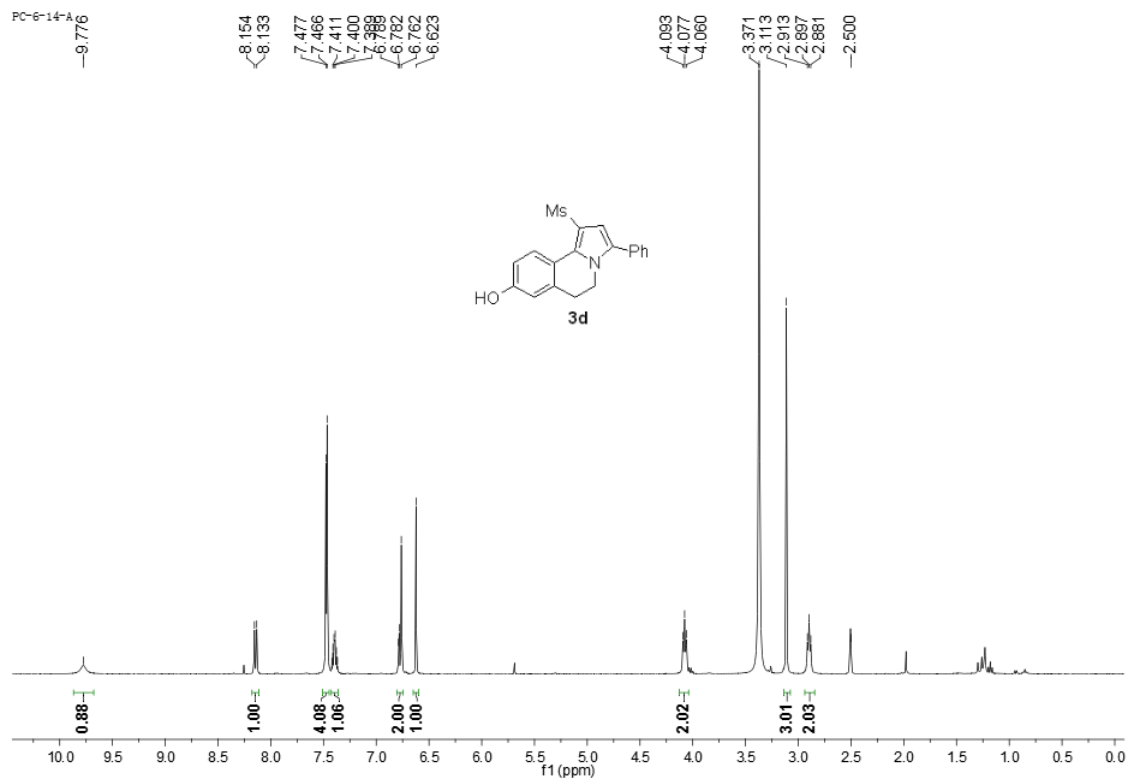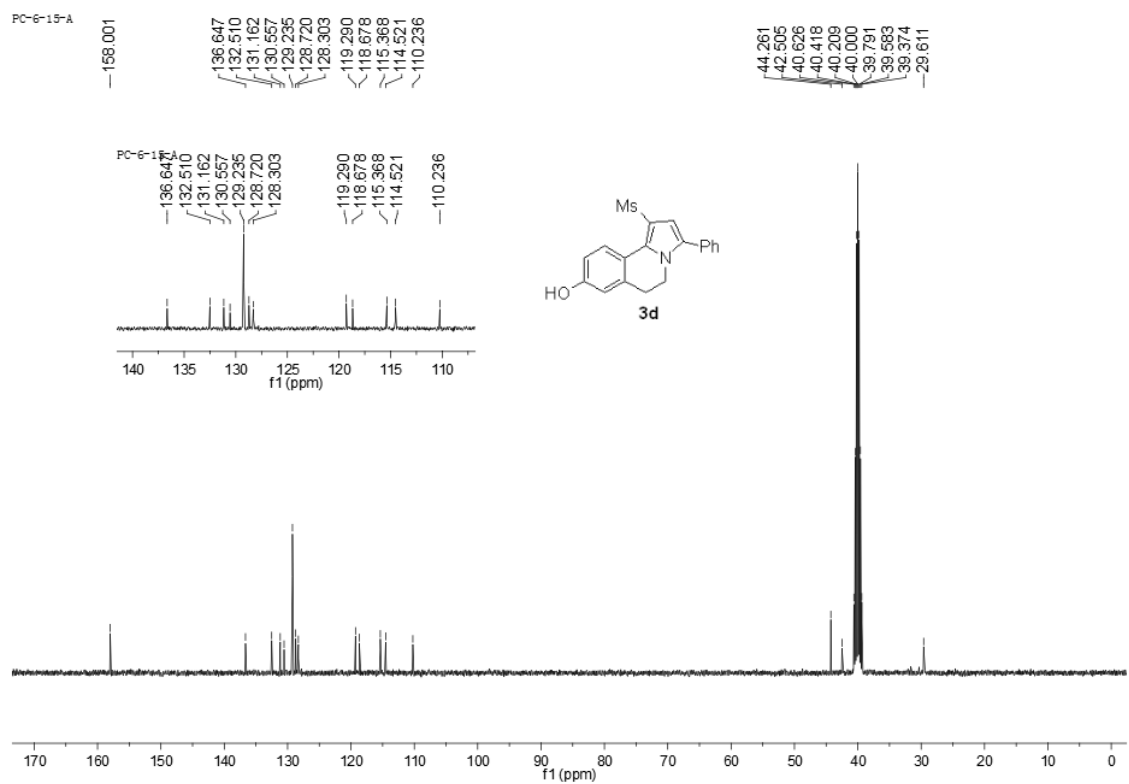

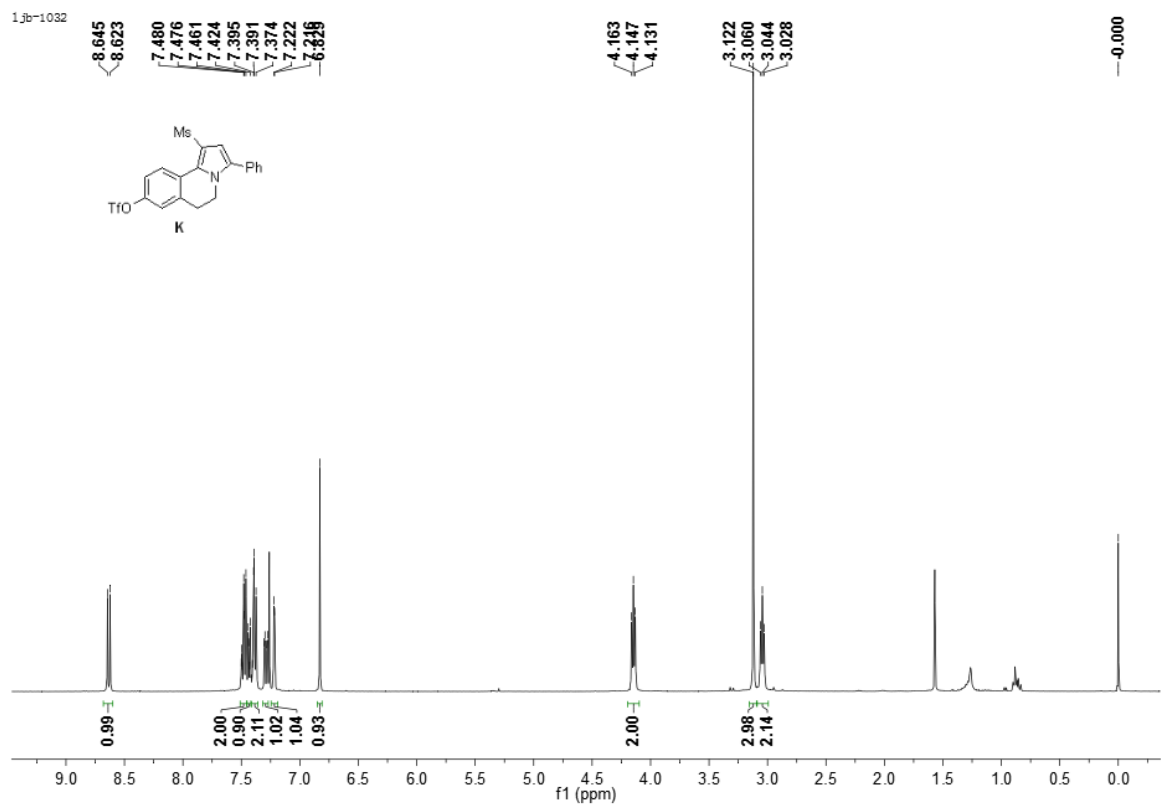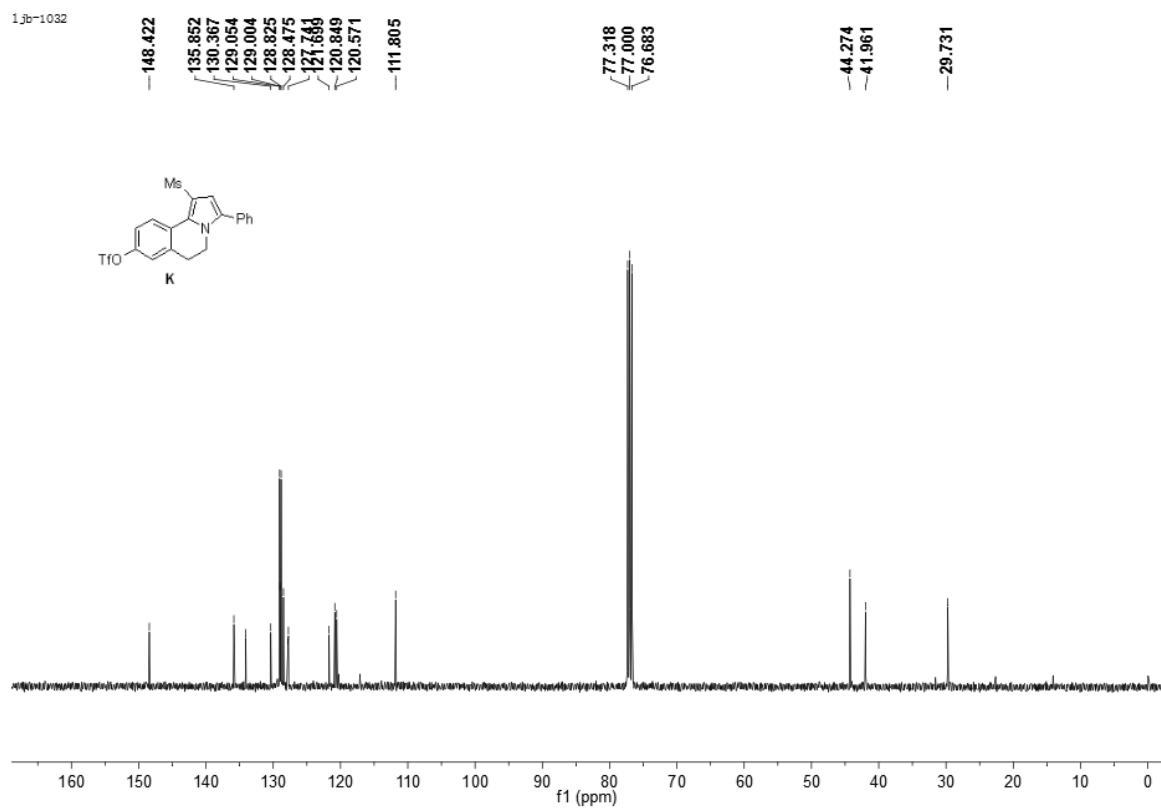

13b-1032

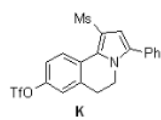

-72.779

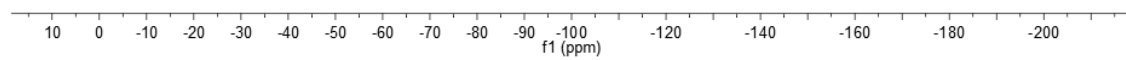

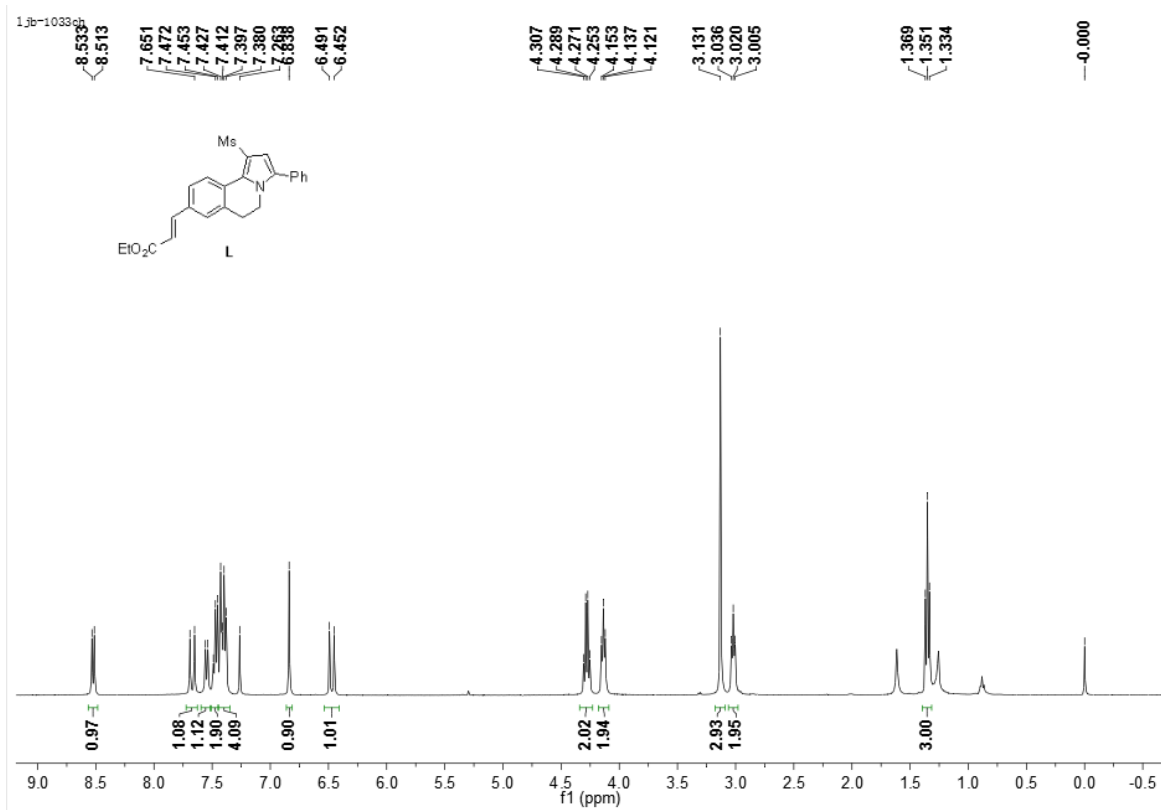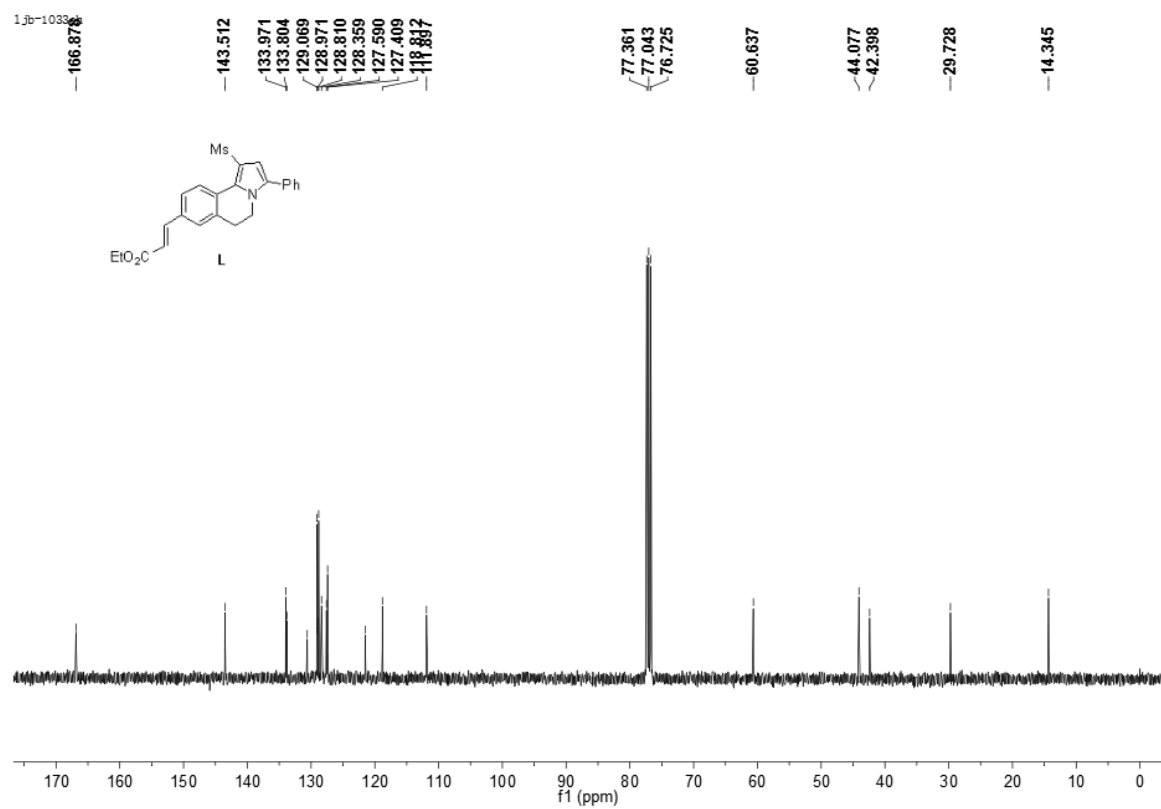

1j0-1111

8.514  
8.494  
7.531  
7.443  
7.392  
7.389  
7.372  
7.350  
7.345

4.131  
4.116  
4.099  
3.121  
3.008  
2.992  
2.976

-0.000

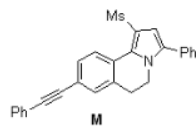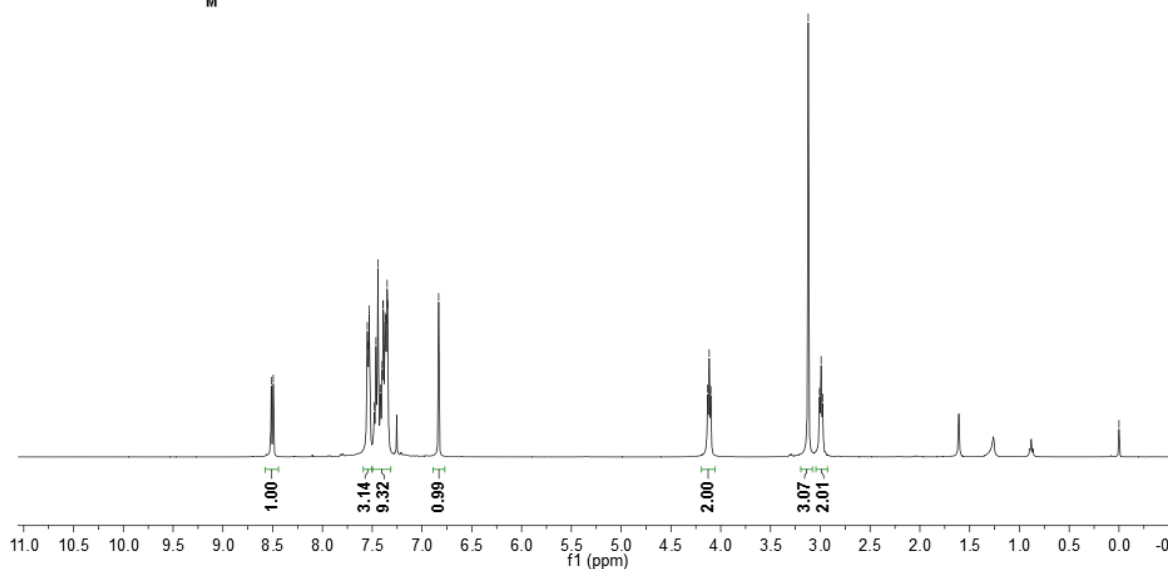

1j0-

133.695  
133.336  
131.604  
130.999  
130.793  
130.595  
129.068  
129.001  
128.731  
128.454  
128.372  
128.232  
127.056  
126.853  
122.951  
122.781  
121.151  
111.694

90.919  
88.966  
77.317  
77.000  
76.682

43.880  
42.299  
29.514

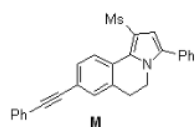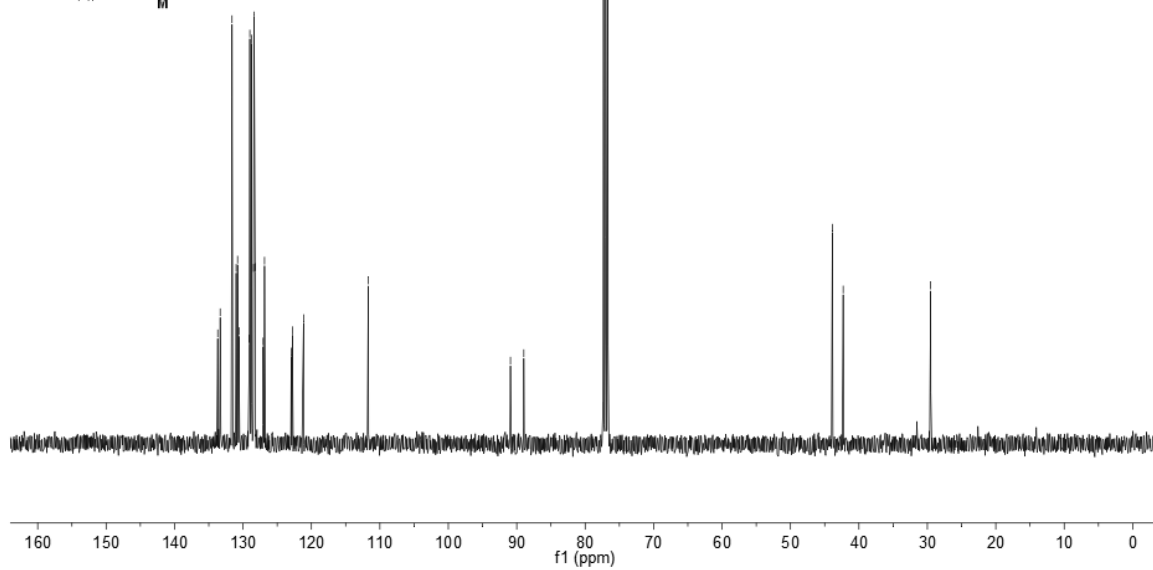



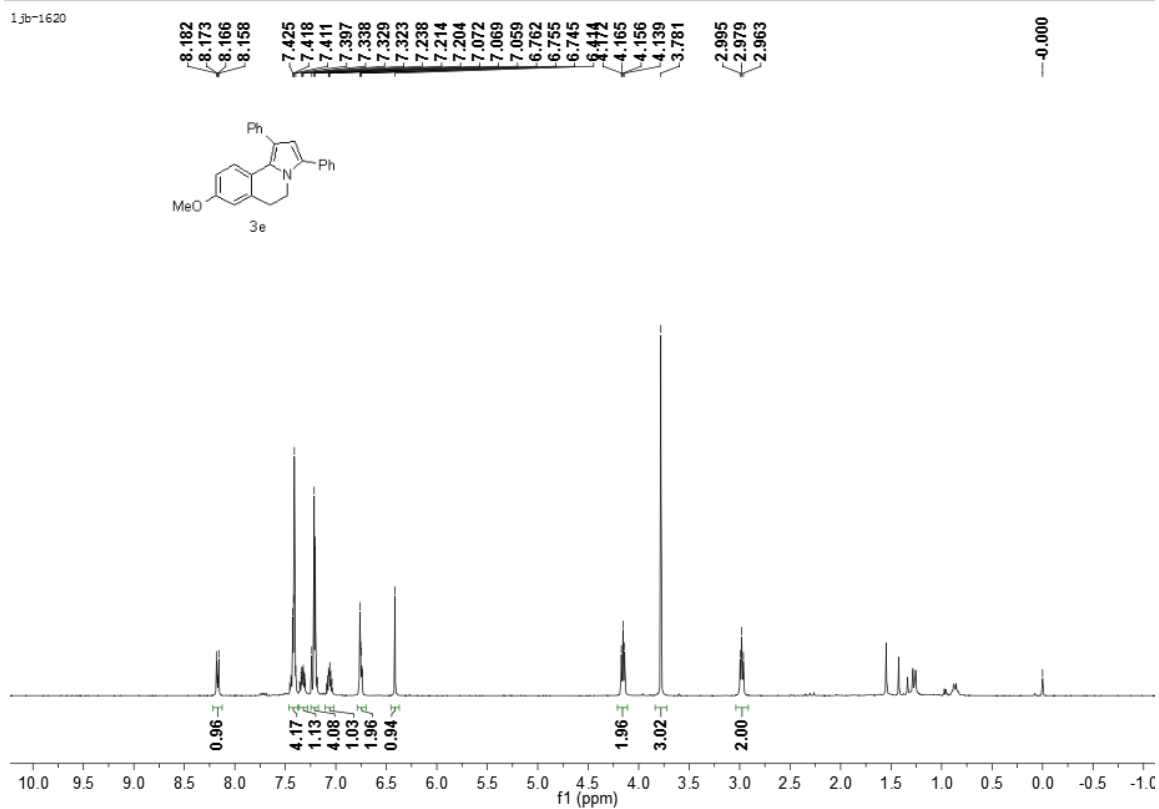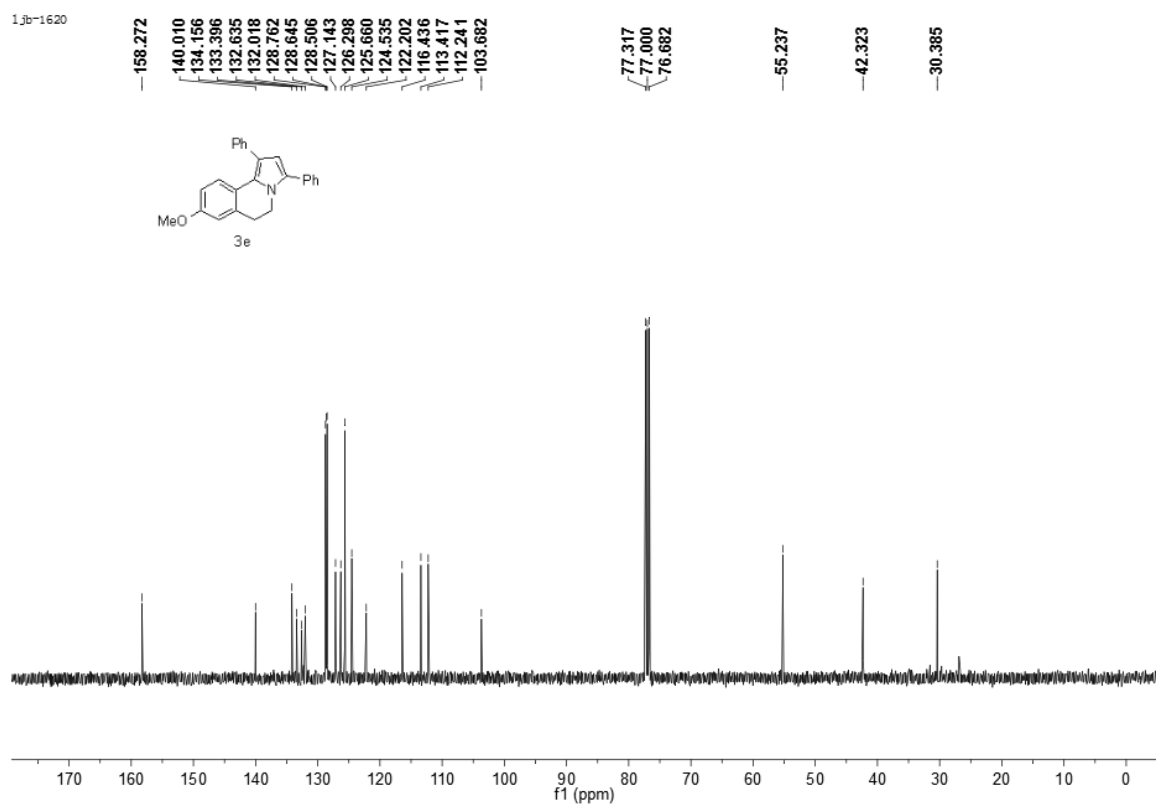

PC-9-6

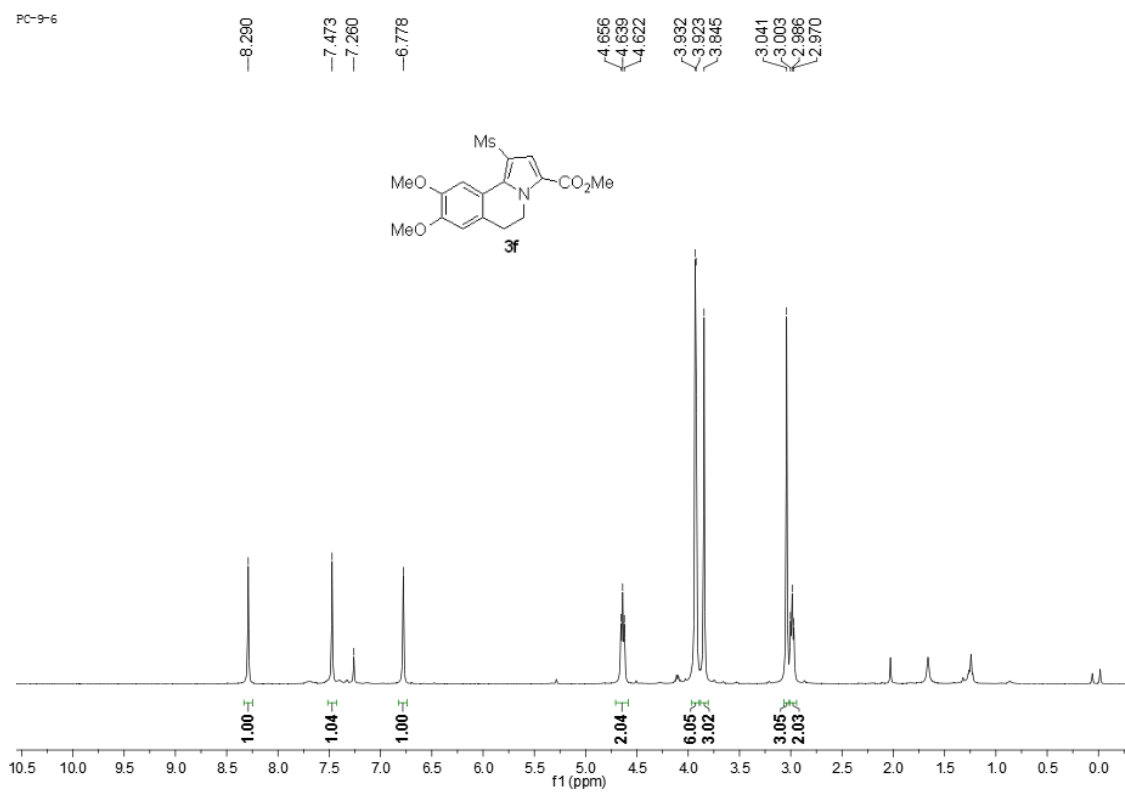

PC-9-6

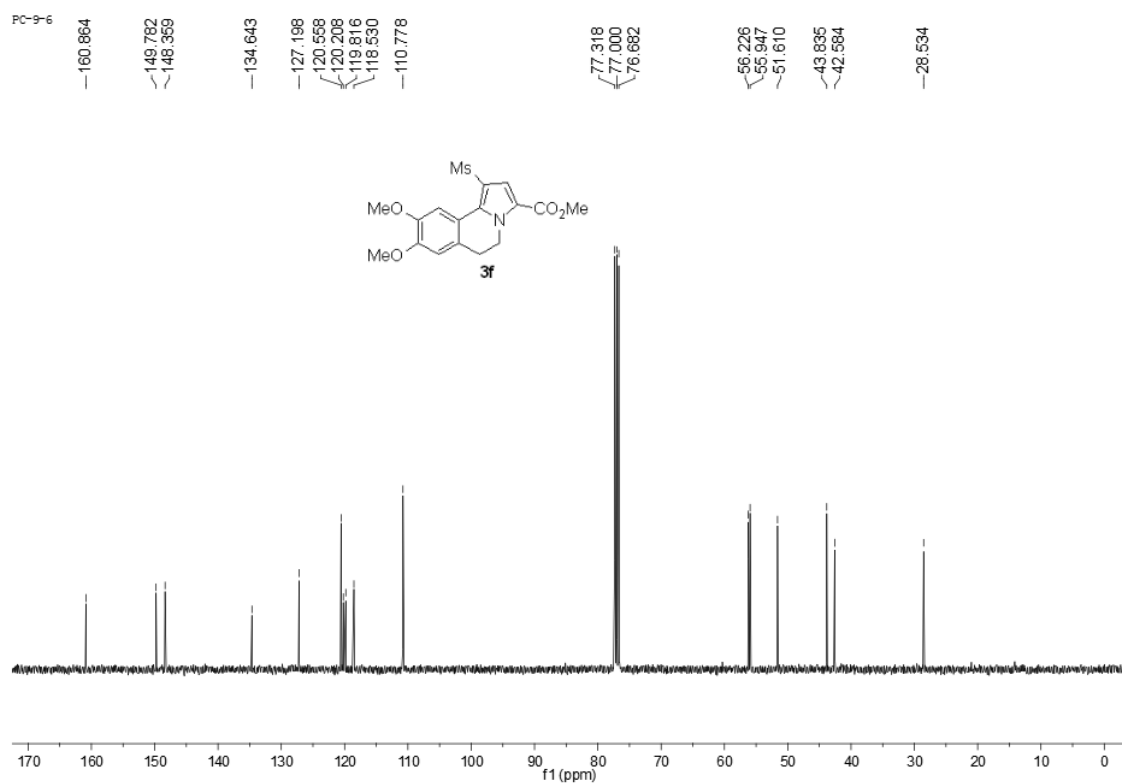

Supplement: Supplementary file 1 [file 14417324]
